# Supplementary material for: σ28-dependent small RNA regulation of flagella biosynthesis
Source: eLife. 2023 Oct 16;12:RP87151. doi: 10.7554/eLife.87151 (PMC10578931; doi:10.7554/eLife.87151)
Supplement: Supplementary file 2. — Total RNA libraries reads were subject to differential expression analyses conducted with DESeq2 (Love et al., 2014). For MotR* and FliX data, three biological repeats were analyzed for the vector control strain (pZE) and for the MotR* or FliX overexpressing strain (pZE-MotR*, pZE-FliX). For ΔfliA data (Fitzgerald et al., 2014), two biological repeats were analyzed for the WT strain and for the ΔfliA strain. [file elife-87151-supp2.xlsx]

## Sheet: MotRstar overexpression
Gene name	Fold change	log2 Fold Change	p-value	padj	-log (padj)	baseMean	lfcSE	Gene Description
flhC	549.49	9.10195	4.06844e-200	1.86701e-196	195.729	156134	0.302435	DNA-binding transcriptional dual regulator FlhC
motR	909.735	9.8293	4.89594e-102	1.12337e-98	97.9495	289349	0.46101	Sigma 28 dependent sRNA
sucA	3.87667	1.95482	4.57274e-73	6.99478e-70	69.1552	822.356	0.108981	subunit of E1(0) component of 2-oxoglutarate dehydrogenase
gatZ	5.35681	2.42137	1.71837e-56	1.9714e-53	52.7052	307.182	0.154664	putative tagatose-1,6-bisphosphate aldolase 2 chaperone
sdhA	6.25246	2.64442	3.65797e-55	3.35729e-52	51.474	542.422	0.170633	succinate:quinone oxidoreductase, FAD binding protein
sdhB	5.66645	2.50244	1.27349e-54	9.74011e-52	51.0114	423.814	0.162399	succinate:quinone oxidoreductase, iron-sulfur cluster binding protein
gatA	8.40981	3.07207	1.59847e-50	1.04791e-47	46.9797	163.919	0.207904	galactitol-specific PTS enzyme IIA component
cspE	2.3726	1.24647	3.27462e-43	1.8784e-40	39.7262	14586.9	0.0919172	transcription antiterminator and regulator of RNA stability CspE
sucB	3.69188	1.88436	1.36646e-36	6.96745e-34	33.1569	276.698	0.151651	SucB-dihydrolipoate // SucB-S-succinyldihydrolipoate // SucB-lipoate // dihydrolipoyltranssuccinylase
dhaM	3.47178	1.79568	4.2782e-35	1.96327e-32	31.707	426.593	0.147825	dihydroxyacetone kinase subunit M
ompF	2.03356	1.02401	2.39027e-34	9.97176e-32	31.0012	4424	0.0850974	outer membrane porin F
malP	6.88956	2.78441	2.97929e-32	1.05169e-29	28.9781	110.169	0.240183	maltodextrin phosphorylase
gatC	6.30967	2.65756	3.67234e-31	1.20374e-28	27.9195	143.287	0.234063	galactitol-specific PTS enzyme IIC component
ivbL	2.87969	1.52591	2.29633e-29	7.02524e-27	26.1533	756.685	0.138526	<i>ilvBN</i> operon leader peptide
cspE_3'	2.63907	1.40003	2.20562e-28	6.32601e-26	25.1989	6291.09	0.129471
sucC	3.84846	1.94428	1.47609e-26	3.56515e-24	23.4479	170.924	0.186681	succinyl-CoA synthetase subunit &beta;
manX	3.03824	1.60324	1.41539e-25	3.24761e-23	22.4884	248.56	0.157222	mannose-specific PTS enzyme IIAB component
fimA	2.58785	1.37175	1.51301e-25	3.30629e-23	22.4807	459.193	0.134387	type 1 fimbriae major subunit
aer	4.77454	2.25536	2.37608e-25	4.95629e-23	22.3048	149.692	0.222054	aerotaxis receptor
sdhC	2.57065	1.36213	5.20807e-25	1.03912e-22	21.9833	810.345	0.135031	succinate:quinone oxidoreductase, membrane protein SdhC
lacZ	2.63862	1.39979	7.05948e-25	1.34983e-22	21.8697	859.455	0.139435	&beta;-galactosidase
csrB	2.17713	1.12243	8.92872e-25	1.63896e-22	21.7854	3712.14	0.112194	small regulatory RNA CsrB
gatB	8.85254	3.14609	1.73242e-24	3.05771e-22	21.5146	67.2133	0.316721	galactitol-specific PTS enzyme IIB component
nuoG	2.04977	1.03546	6.2172e-24	1.05669e-21	20.9761	993.223	0.105043	NADH:quinone oxidoreductase subunit G
malE	8.43966	3.07718	2.03538e-23	3.33585e-21	20.4768	76.1403	0.31518	maltose ABC transporter periplasmic binding protein
gatY	2.36901	1.24429	2.51882e-23	3.98581e-21	20.3995	622.636	0.128402	tagatose-1,6-bisphosphate aldolase 2
malM	9.48204	3.2452	3.00132e-22	4.30408e-20	19.3661	55.7824	0.34289	maltose regulon periplasmic protein
fliT	3.81331	1.93105	1.29423e-21	1.74682e-19	18.7578	260.845	0.207984	flagellar biosynthesis protein FliT
gltB	2.32963	1.2201	1.90696e-21	2.43084e-19	18.6142	443.024	0.131832	glutamate synthase subunit GltB
dhaK	3.34655	1.74268	1.1225e-20	1.3922e-18	17.8563	162.189	0.192582	dihydroxyacetone kinase subunit K
glpK	2.2506	1.17031	2.04414e-20	2.46857e-18	17.6076	450.908	0.130224	glycerol kinase
flgE	2.11304	1.07932	2.91291e-20	3.42753e-18	17.465	1160.99	0.120351	flagellar hook protein FlgE
fliS	4.06543	2.02341	3.15083e-20	3.61479e-18	17.4419	216.174	0.226658	flagellar biosynthesis protein FliS
malT	2.01767	1.01269	7.74235e-20	8.66576e-18	17.0622	717.951	0.114293	DNA-binding transcriptional activator MalT
malK	38.7498	5.27612	2.02985e-19	2.16628e-17	16.6643	45.8971	0.594064	maltose ABC transporter ATP binding subunit
nuoL	2.60264	1.37998	1.99995e-19	2.16628e-17	16.6643	292.652	0.157986	NADH:quinone oxidoreductase subunit L
sdhX	2.44656	1.29075	2.20554e-19	2.30028e-17	16.6382	355.047	0.147937	small regulatory RNA SdhX
manZ	2.77103	1.47042	2.37599e-19	2.42298e-17	16.6157	213.334	0.168816	mannose-specific PTS enzyme IID component
sucD	2.96694	1.56897	2.56683e-19	2.5607e-17	16.5916	212.375	0.180751	succinyl-CoA synthetase subunit &alpha;
gltA	1.92009	0.941171	6.64799e-19	6.22605e-17	16.2058	1582.82	0.109041	citrate synthase
flgD	2.00979	1.00704	1.13965e-18	1.04597e-16	15.9805	809.304	0.117597	flagellar biosynthesis, initiation of hook assembly
malQ	4.02419	2.0087	7.12274e-18	6.28582e-16	15.2016	104.904	0.241592	4-&alpha;-glucanotransferase
nuoC	1.9809	0.986159	2.28677e-17	1.908e-15	14.7194	515.238	0.120096	NADH:quinone oxidoreductase subunit CD
glpQ	2.23633	1.16113	2.82308e-17	2.31341e-15	14.6357	376.752	0.1422	glycerophosphoryl diester phosphodiesterase GlpQ
nuoN	2.40113	1.26371	9.14185e-17	7.35999e-15	14.1331	273.084	0.157629	NADH:quinone oxidoreductase subunit N
glpT	2.96946	1.5702	1.60291e-16	1.26824e-14	13.8968	158.916	0.197858	sn-glycerol 3-phosphate:phosphate antiporter
dhaL	3.44351	1.78388	2.06911e-16	1.60935e-14	13.7934	99.2047	0.226455	dihydroxyacetone kinase subunit L
flhD	2.18201	1.12566	3.5538e-16	2.67351e-14	13.5729	281.316	0.14335	DNA-binding transcriptional dual regulator FlhD
fliH	2.02256	1.01618	6.20074e-16	4.5167e-14	13.3452	673.414	0.130321	flagellar biosynthesis protein FliH
sdhD	3.42711	1.77699	7.81277e-16	5.51582e-14	13.2584	145.459	0.229701	succinate:quinone oxidoreductase, membrane protein SdhD
fliF	1.68422	0.752077	2.48138e-15	1.72531e-13	12.7631	1573.52	0.0979828	flagellar basal-body MS-ring and collar protein
ynfM	2.63767	1.39927	3.05941e-15	2.06465e-13	12.6852	153.017	0.185241	putative transporter YnfM
lacY	2.48236	1.31171	6.44902e-15	4.22779e-13	12.3739	205.689	0.176051	lactose permease
fliK	1.92157	0.942285	1.15918e-14	7.38814e-13	12.1315	466.623	0.126753	flagellar hook-length control protein
arcZ	1.70775	0.772093	3.29453e-14	1.98929e-12	11.7013	1526.58	0.105322	small regulatory RNA ArcZ
fnrS	2.90179	1.53694	3.35515e-14	1.99959e-12	11.6991	189.718	0.212955	small regulatory RNA FnrS
yecR	1.82962	0.871544	3.61317e-14	2.12575e-12	11.6725	652.199	0.119489	lipoprotein YecR
ychH	2.85727	1.51463	5.25992e-14	3.05542e-12	11.5149	173.309	0.211026	stress-induced protein
nuoI	2.26146	1.17725	5.7793e-14	3.31515e-12	11.4795	215.907	0.16393	NADH:quinone oxidoreductase subunit I
sibB	1.65814	0.729567	7.11264e-14	3.98048e-12	11.4001	3212.39	0.100791	small RNA SibB
fliI	1.8578	0.893595	1.20224e-13	6.56794e-12	11.1826	792.266	0.125445	flagellar export ATPase FliI
nuoF	2.15808	1.10975	1.56589e-13	8.45394e-12	11.0729	302.929	0.157156	NADH:quinone oxidoreductase subunit F
amyA	2.55267	1.35201	3.76925e-13	1.96558e-11	10.7065	316.782	0.195547	alpha-amylase
manY	2.22375	1.15299	8.19594e-13	4.16337e-11	10.3806	181.419	0.169277	mannose-specific PTS enzyme IIC component
flgJ	2.04976	1.03545	1.42477e-12	7.03041e-11	10.153	527.868	0.153289	putative peptidoglycan hydrolase FlgJ
fliG	1.789	0.839157	1.74534e-12	8.34308e-11	10.0787	974.35	0.124099	flagellar motor switch protein FliG
flgH	2.06951	1.04929	2.04102e-12	9.65593e-11	10.0152	390.482	0.156567	flagellar L-ring protein
galE	2.43945	1.28656	3.53111e-12	1.6535e-10	9.7816	239.905	0.195459	UDP-glucose 4-epimerase
lamB	3.97168	1.98975	5.01094e-12	2.32275e-10	9.634	61.9963	0.306984	maltose outer membrane channel / phage lambda receptor protein
aldA	4.07738	2.02764	5.42763e-12	2.49074e-10	9.60367	78.6104	0.313525	aldehyde dehydrogenase A
flgB	1.60536	0.6829	5.86012e-12	2.66258e-10	9.5747	1057.81	0.10301	flagellar basal-body rod protein FlgB
flgG	1.80102	0.848812	6.03153e-12	2.7136e-10	9.56645	635.231	0.129047	flagellar basal-body rod protein FlgG
nuoE	2.50642	1.32563	8.50078e-12	3.71525e-10	9.43001	166.515	0.205281	NADH:quinone oxidoreductase subunit E
dctA	2.12086	1.08465	1.62338e-11	6.77245e-10	9.16925	183.298	0.17012	C4 dicarboxylate/orotate:H<sup>+</sup> symporter
lacA	2.85988	1.51595	2.15785e-11	8.84142e-10	9.05348	177.674	0.24157	galactoside <i>O</i>-acetyltransferase
nuoM	2.15183	1.10556	2.1466e-11	8.84142e-10	9.05348	211.526	0.174614	NADH:quinone oxidoreductase subunit M
uhpU	6.86719	2.77972	4.18878e-11	1.68617e-09	8.7731	274.05	0.452171	Sigma 28 dependent sRNA
betA	2.42442	1.27764	4.35086e-11	1.73618e-09	8.76041	190.343	0.205974	choline dehydrogenase
glmY	1.46445	0.550358	1.03648e-10	4.0653e-09	8.39091	12226.5	0.0881237	small regulatory RNA GlmY
acnB	1.53414	0.617431	1.51647e-10	5.75129e-09	8.24023	1282.52	0.100354	AcnB
fimD	2.71678	1.4419	2.33863e-10	8.65481e-09	8.06274	91.6908	0.243768	type I fimbriae usher protein
fliZ	1.71834	0.781015	2.75805e-10	1.01253e-08	7.99459	588.115	0.130194	DNA-binding transcriptional regulator FliZ
raiA	1.67152	0.741158	3.55619e-10	1.28499e-08	7.8911	4697.93	0.124214	ribosome-associated inhibitor A
fliJ	2.01134	1.00816	4.11994e-10	1.46561e-08	7.83398	200.761	0.171454	flagellar biosynthesis protein FliJ
clpA	1.53899	0.621983	5.86626e-10	2.04372e-08	7.68958	843.61	0.10482	ATP-dependent Clp protease ATP-binding subunit ClpA
ynjH	5.15917	2.36714	6.41407e-10	2.2131e-08	7.655	40.5957	0.413119	DUF1496 domain-containing protein YnjH
flhB	1.59282	0.671582	1.25326e-09	4.26015e-08	7.37058	1005.55	0.116013	flagellar biosynthesis protein FlhB
msrB	1.74598	0.804035	1.27949e-09	4.31735e-08	7.36478	459.02	0.140222	methionine sulfoxide reductase B
modB	2.51696	1.33168	1.4347e-09	4.77089e-08	7.3214	97.1263	0.23732	molybdate ABC transporter membrane subunit
cyaR	1.96525	0.974713	1.48046e-09	4.88766e-08	7.3109	238.102	0.17239	small regulatory RNA CyaR
proX	1.5137	0.598081	1.58055e-09	5.14407e-08	7.28869	1182.64	0.103442	glycine betaine ABC transporter periplasmic binding protein ProX
malM_3'	4.32965	2.11425	1.60598e-09	5.19003e-08	7.28483	40.1075	0.378474
flgI	1.85039	0.887828	1.71271e-09	5.45806e-08	7.26296	383.022	0.156671	flagellar P-ring protein
fliO	1.63594	0.710123	2.35218e-09	7.29749e-08	7.13683	724.31	0.125355	flagellar biosynthesis protein FliO
sibA	1.50705	0.591723	2.35352e-09	7.29749e-08	7.13683	896.504	0.103527	small RNA SibA
adhE	1.5638	0.645057	2.84535e-09	8.76329e-08	7.05733	709.88	0.114039	fused acetaldehyde-CoA dehydrogenase and iron-dependent alcohol dehydrogenasealdehyde/alcohol dehydrogenase AdhE
fliN	1.65118	0.7235	2.91056e-09	8.90436e-08	7.0504	455.217	0.128661	flagellar motor switch protein FliN
nuoB	1.96912	0.977552	3.61769e-09	1.09221e-07	6.96169	254.404	0.177246	NADH:quinone oxidoreductase subunit B
flgO	3.68806	1.88286	6.07905e-09	1.78825e-07	6.74757	699.819	0.354413	Sigma 28 dependent sRNA
cheZ	10.9945	3.45872	9.33195e-09	2.7104e-07	6.56697	135.601	0.663982	chemotaxis protein CheZ
flgF	1.8152	0.860125	1.11838e-08	3.20766e-07	6.49381	495.977	0.161098	flagellar basal-body rod protein FlgF
gatD	3.45338	1.78801	1.87791e-08	5.1914e-07	6.28472	44.1683	0.349703	galactitol-1-phosphate 5-dehydrogenase
uhpT	5.05066	2.33647	2.67265e-08	7.30048e-07	6.13665	183.668	0.465262	hexose-6-phosphate:phosphate antiporter
icd	1.40811	0.493763	3.58878e-08	9.74491e-07	6.01122	2379.67	0.0932844	isocitrate dehydrogenase
udp	1.69865	0.764392	4.21656e-08	1.11206e-06	5.95387	545.327	0.149344	uridine phosphorylase
csgC	2.16555	1.11473	4.90155e-08	1.2708e-06	5.89592	97.8397	0.223319	curlin chaperone
flgL	2.81153	1.49135	4.98166e-08	1.28432e-06	5.89133	975.039	0.302009	flagellar hook-filament junction protein 2
ykfB	2.10497	1.0738	5.36187e-08	1.37462e-06	5.86182	109.809	0.215517	CP4-6 prophage; protein YkfB
cyoC	1.59158	0.67046	6.65563e-08	1.68744e-06	5.77277	845.857	0.13207	cytochrome <i>bo</i><sub>3</sub> subunit 3
fliA	1.68903	0.756197	6.99652e-08	1.75448e-06	5.75585	2036.64	0.150462	RNA polymerase sigma factor FliA
flgA	1.5064	0.591103	7.18752e-08	1.79258e-06	5.74652	771.515	0.115856	flagellar basal body P-ring formation protein FlgA
modA	1.76468	0.819408	8.35315e-08	2.07203e-06	5.6836	244.922	0.164983	molybdate ABC transporter periplasmic binding protein
tcyJ	1.62554	0.700917	8.78184e-08	2.16666e-06	5.66421	330.784	0.140113	cystine ABC transporter periplasmic binding protein
glpF	1.86875	0.902077	9.47569e-08	2.32535e-06	5.63351	196.83	0.183833	glycerol facilitator
betB	1.92395	0.944073	1.16134e-07	2.83478e-06	5.54748	200.223	0.194152	betaine aldehyde dehydrogenase
ynaJ	1.47657	0.56225	1.65397e-07	3.93267e-06	5.40531	1058.49	0.113478	DUF2534 domain-containing protein YnaJ
ybhQ	1.65062	0.723007	2.01912e-07	4.75167e-06	5.32315	286.857	0.149629	inner membrane protein YbhQ
fliP	1.52778	0.611434	2.17955e-07	5.10304e-06	5.29217	445.513	0.125403	flagellar biosynthesis protein FliP
modC	2.47147	1.30537	2.3629e-07	5.50424e-06	5.2593	64.9177	0.280422	molybdate ABC transporter ATP binding subunit
malG_3'	18.6943	4.22453	2.76925e-07	6.38598e-06	5.19477	12.8761	0.876161
mcaS	1.46368	0.549599	2.85209e-07	6.54413e-06	5.18415	704.397	0.113138	small regulatory RNA McaS
nuoH	2.08552	1.06041	2.89144e-07	6.6014e-06	5.18036	166.42	0.227875	NADH:quinone oxidoreductase subunit H
deoA	1.97992	0.98544	3.6145e-07	8.17091e-06	5.08773	112.543	0.213219	thymidine phosphorylase
yeiQ	2.02723	1.01951	3.86e-07	8.6831e-06	5.06133	124.997	0.221426	putative oxidoreductase YeiQ
flgC	1.60136	0.679299	4.6455e-07	1.02001e-05	4.9914	400.799	0.145103	flagellar basal-body rod protein FlgC
malG	6.67614	2.73901	4.70722e-07	1.02601e-05	4.98885	16.4609	0.610468	maltose ABC transporter membrane subunit MalG
raiZ	1.61988	0.69589	4.81629e-07	1.04255e-05	4.9819	1665.34	0.149438	small RNA RaiZ
ldhA	1.60909	0.686242	5.12082e-07	1.10326e-05	4.95732	275.786	0.147223	D-lactate dehydrogenase
malF	3.23046	1.69174	7.08087e-07	1.51135e-05	4.82063	37.724	0.38604	maltose ABC transporter membrane subunit MalF
fliL	1.39215	0.477312	7.22733e-07	1.53547e-05	4.81376	1327.09	0.101195	flagellar protein FliL
fumA	1.77032	0.824009	7.29175e-07	1.54202e-05	4.81191	197.404	0.182078	fumarase A
ilvL	1.47006	0.555879	8.14508e-07	1.70675e-05	4.76783	1332.15	0.119985	<i>ilvXGMEDA</i> operon leader peptide
grcA	3.31173	1.72759	8.96417e-07	1.853e-05	4.73212	910.868	0.401639	stress-induced alternate pyruvate formate-lyase subunit
bssR	3.27335	1.71077	9.25259e-07	1.90404e-05	4.72032	36.9497	0.394869	regulator of biofilm formation
fliX	6.74585	2.754	9.62767e-07	1.96606e-05	4.7064	3466.41	0.64979	Sigma 28 dependent sRNA
ryeA	1.59696	0.67533	9.63965e-07	1.96606e-05	4.7064	439.955	0.148665	small antisense RNA RyeA
aroG	1.43603	0.522087	9.76778e-07	1.98338e-05	4.70259	649.893	0.112899	3-deoxy-7-phosphoheptulonate synthase, Phe-sensitive
glpA	2.64932	1.40562	1.51442e-06	3.00852e-05	4.52165	44.4417	0.331921	anaerobic glycerol-3-phosphate dehydrogenase subunit A
hslJ	1.92039	0.941396	1.61146e-06	3.16024e-05	4.50028	130.947	0.21908	lipoprotein implicated in Novobiocin resistance
lysW	1.38219	0.466951	1.62524e-06	3.17371e-05	4.49843	502764	0.102488	tRNA-Lys(UUU)
motA	14.008	3.80818	2.04956e-06	3.91894e-05	4.40683	4012.74	0.944608	motility protein A
yohJ	1.94671	0.961038	2.06338e-06	3.92898e-05	4.40572	133.415	0.225932	putative 3-hydroxypropanoate export protein YohJ
dgcE	1.78789	0.838261	2.35423e-06	4.43471e-05	4.35313	153.818	0.196669	putative diguanylate cyclase DgcE
maeB	1.71242	0.776036	2.38654e-06	4.47014e-05	4.34968	172.714	0.181452	malate dehydrogenase (oxaloacetate-decarboxylating) (NADP<sup>+</sup>)
pepN	1.40847	0.494124	2.43646e-06	4.54508e-05	4.34246	611.611	0.11109	aminopeptidase N
cvrA	1.53474	0.617991	2.51649e-06	4.63782e-05	4.33369	322.401	0.142021	putative K<sup>+</sup>:H<sup>+</sup> antiporter
fdoH	1.5399	0.622838	2.78746e-06	5.07606e-05	4.29447	585.202	0.14374	formate dehydrogenase O subunit &beta;
pdeL	1.57637	0.656607	3.05422e-06	5.53984e-05	4.2565	305.434	0.153119	DNA-binding transcriptional regulator/c-di-GMP phosphodiesterase PdeL
fliE	1.4976	0.582655	3.11728e-06	5.63196e-05	4.24934	605.997	0.134465	flagellar protein FliE
ybgU	1.49353	0.578723	5.03227e-06	8.95081e-05	4.04814	881.033	0.135839	protein YbgU
yfcZ	1.80572	0.852571	5.27866e-06	9.35281e-05	4.02906	362.242	0.209624	DUF406 domain-containing protein YfcZ
dadX	2.44339	1.28888	5.33047e-06	9.40828e-05	4.02649	51.2331	0.325986	alanine racemase 2
valV	1.32443	0.405376	5.59333e-06	9.83441e-05	4.00725	352036	0.0934547	tRNA-Val(GAC)
rcsA	1.53699	0.620107	5.73353e-06	0.000100424	3.99816	281.786	0.148795	DNA-binding transcriptional activator RcsA
lldP	1.67631	0.745287	6.06506e-06	0.000105827	3.9754	156.102	0.182658	lactate/glycolate:H<sup>+</sup> symporter LldP
ryfD	1.26941	0.344163	6.24674e-06	0.000108584	3.96423	9819.76	0.0788756	small regulatory RNA RyfD
gdhA	1.65472	0.726589	6.2894e-06	0.000108913	3.96292	173.005	0.17778	glutamate dehydrogenase
ybgV	1.5455	0.628075	6.38077e-06	0.00011008	3.95829	415.831	0.151914	protein YbgV
ymdB	1.6292	0.704167	6.41351e-06	0.000110231	3.9577	187.939	0.1721	2'-<i>O</i>-acetyl-ADP-ribose deacetylase, regulator of RNase III activity
ymdA	1.94329	0.958499	6.54463e-06	0.000112065	3.95053	87.2506	0.240692	uncharacterized protein YmdA
aspA	1.6189	0.695012	7.62133e-06	0.000129056	3.88922	800.37	0.171294	aspartate ammonia-lyase
fumC	1.97928	0.984977	8.73105e-06	0.000147304	3.83178	76.6388	0.252623	fumarase C
ileV	1.42111	0.507023	9.26416e-06	0.000155726	3.80764	692835	0.122463	tRNA-Ile(GAU)
cyoE	1.50449	0.589277	9.30114e-06	0.000155777	3.8075	1317.97	0.144513	heme O synthase
puuD	2.13308	1.09294	9.90242e-06	0.000164051	3.78502	67.5168	0.285231	&gamma;-glutamyl-&gamma;-aminobutyrate hydrolase
fruA	1.47335	0.559096	1.07906e-05	0.000178123	3.74928	419.36	0.137758	fructose-specific PTS multiphosphoryl transfer protein FruA
hypD_AS	3.77628	1.91696	1.17104e-05	0.000190888	3.71922	133.763	0.522737
flgK	2.95299	1.56218	1.17303e-05	0.000190888	3.71922	1236.25	0.423101	flagellar hook-filament junction protein 1
fliD	2.54448	1.34737	1.2239e-05	0.000197764	3.70385	702.886	0.36227	flagellar filament capping protein
entF	1.9787	0.984554	1.25562e-05	0.000202177	3.69427	96.1848	0.258306	seryl-[EntF peptidyl-carrier protein] // <i>holo</i> [EntF peptidyl-carrier protein] // apo-serine activating enzyme
nuoJ	1.8213	0.864965	1.55575e-05	0.000246184	3.60874	114.428	0.228172	NADH:quinone oxidoreductase subunit J
flhA	1.44198	0.528047	1.87283e-05	0.000292327	3.53413	454.468	0.133624	flagellar biosynthesis protein FlhA
sibD	1.31945	0.399939	1.9308e-05	0.00029733	3.52676	3026.76	0.0985092	small RNA SibD
ghrA	2.20444	1.14042	1.94083e-05	0.000297875	3.52597	50.7938	0.312798	glyoxylate/hydroxypyruvate reductase A
frdA	1.95438	0.966711	2.23015e-05	0.000338879	3.46996	89.4272	0.264417	fumarate reductase flavoprotein subunit
fliC	6.43311	2.68552	2.76797e-05	0.000415106	3.38184	13010.7	0.790815	flagellar filament structural protein
pykA	1.60148	0.679405	2.79763e-05	0.000418074	3.37875	199.44	0.181517	pyruvate kinase 2
acnA	1.52428	0.608124	3.19973e-05	0.000470265	3.32766	225.033	0.1617	aconitate hydratase 1
clpS	1.49793	0.582966	3.56032e-05	0.000512172	3.29058	244.521	0.15543	specificity factor for ClpA-ClpP chaperone-protease complex
tcyN	1.68269	0.75077	3.61118e-05	0.000517866	3.28578	129.131	0.206493	cystine ABC transporter ATP binding subunit
lpxP	1.48892	0.574262	3.86346e-05	0.000550604	3.25916	851.047	0.153503	palmitoleoyl acyltransferase
deoC	1.57549	0.655797	3.91248e-05	0.000555863	3.25503	183.355	0.178741	deoxyribose-phosphate aldolase
proW	1.3015	0.380177	5.31616e-05	0.000739268	3.1312	1353.91	0.0992032	glycine betaine ABC transporter membrane subunit ProW
sodB	1.30952	0.389036	5.81409e-05	0.00080364	3.09494	1586.13	0.102337	superoxide dismutase (Fe)
cydH	1.36718	0.451207	6.61654e-05	0.000909081	3.0414	502.327	0.121647	cytochrome <i>bd</i>-I accessory subunit CydH
nanA	1.92495	0.944824	6.86624e-05	0.000940572	3.02661	69.9183	0.282118	<i>N</i>-acetylneuraminate lyase
lldD	2.52586	1.33678	7.11242e-05	0.000971396	3.0126	32.2085	0.411736	L-lactate dehydrogenase
mdh	1.37038	0.454575	7.59007e-05	0.0010305	2.98695	418.724	0.12388	malate dehydrogenase
deoB	1.30604	0.385204	7.57687e-05	0.0010305	2.98695	1094.37	0.103052	phosphopentomutase
fruB	1.50318	0.58802	7.77169e-05	0.00105204	2.97797	237.026	0.166164	FruB - his299 phosphorylated // fructose-specific PTS multiphosphoryl transfer protein FruB
ybfA	1.58824	0.667427	8.02807e-05	0.00108038	2.96642	242.86	0.19186	DUF2517 domain-containing protein YbfA
fliR	1.40236	0.487862	8.13378e-05	0.0010914	2.96202	411.117	0.134621	flagellar biosynthesis protein FliR
hcaR	2.84596	1.50892	8.65333e-05	0.0011411	2.94268	22.7895	0.478865	DNA-binding transcriptional dual regulator HcaR
yafQ	1.73123	0.7918	8.62956e-05	0.0011411	2.94268	204.635	0.234346	ribosome-dependent mRNA interferase toxin YafQ
fruK	1.5941	0.672745	8.84433e-05	0.00115962	2.93569	151.583	0.195767	1-phosphofructokinase
ileX	1.28737	0.364425	9.33052e-05	0.00121641	2.91492	10484.8	0.0983334	tRNA-Ile(CAU)
mlc	1.62978	0.704675	0.000101043	0.00130615	2.88401	116.964	0.20876	DNA-binding transcriptional repressor Mlc
glpB	2.34774	1.23127	0.000102054	0.00131553	2.8809	35.0359	0.391122	anaerobic glycerol-3-phosphate dehydrogenase subunit B
gcvT	1.64405	0.717254	0.000102816	0.00132163	2.87889	119.396	0.213281	aminomethyltransferase
lgoR	2.14677	1.10217	0.000104588	0.00133248	2.87534	41.7233	0.345795	putative DNA-binding transcriptional regulator LgoR
rsd	1.3613	0.444983	0.000104651	0.00133248	2.87534	713.98	0.123839	regulator of sigma D
hsdR	1.42656	0.512544	0.000109672	0.00139029	2.8569	297.225	0.145864	type I restriction enzyme EcoKI endonuclease subunit
fliM	1.31679	0.39703	0.00011442	0.00144251	2.84088	772.233	0.109654	flagellar motor switch protein FliM
flgN	2.36225	1.24016	0.000117327	0.00147511	2.83118	2038.18	0.402739	flagellar biosynthesis protein FlgN
rmf	2.20214	1.1389	0.000119401	0.001493	2.82594	51.979	0.363014	ribosome modulation factor
cheW	4.63867	2.21371	0.000123891	0.00154493	2.81109	183.021	0.753373	chemotaxis protein CheW
dinJ	1.5173	0.601511	0.000128186	0.00158556	2.79982	331.108	0.176939	antitoxin/DNA-binding transcriptional repressor DinJ
melR	1.84968	0.887278	0.000134255	0.00165618	2.78089	81.7768	0.279202	DNA-binding transcriptional dual regulator MelR
sibC	1.42062	0.506524	0.000145659	0.00177774	2.75013	2037.13	0.14695	small regulatory RNA antitoxin SibC
dadA	1.82322	0.866486	0.000170432	0.0020496	2.68833	76.0437	0.276588	D-amino acid dehydrogenase
yifL	1.41316	0.498922	0.000170614	0.0020496	2.68833	275.793	0.146383	putative lipoprotein YifL
cheY	4.52439	2.17772	0.000180825	0.00214421	2.66873	73.137	0.772748	CheY-acetylated // CheY-P<sup>asp</sup> // chemotaxis protein CheY
ptsI	1.23487	0.30436	0.000183918	0.00216967	2.66361	6639.95	0.0850106	PTS enzyme I
yciK	1.73755	0.797058	0.000193414	0.00227584	2.64286	89.6178	0.25552	putative oxidoreductase
fimX	1.42081	0.506709	0.000208116	0.00243634	2.61326	1308.44	0.152456
rpoS	1.35334	0.436525	0.000207908	0.00243634	2.61326	723.913	0.127655	RNA polymerase sigma factor RpoS
glcC	1.65635	0.728006	0.000227728	0.00264568	2.57746	103.322	0.232613	DNA-binding transcriptional dual regulator GlcC
treA	2.0564	1.04012	0.000254648	0.00293612	2.53223	40.2098	0.355373	periplasmic trehalase
glpC	2.40005	1.26307	0.000272965	0.00311601	2.5064	25.7014	0.446061	anaerobic glycerol-3-phosphate dehydrogenase subunit C
yecV	2.06056	1.04303	0.000272284	0.00311601	2.5064	39.8754	0.359456	protein YecV
cyoD	1.42715	0.513133	0.000349802	0.0039068	2.40818	378.976	0.16083	cytochrome <i>bo</i><sub>3</sub> subunit 4
mntS	1.22106	0.288128	0.000349901	0.0039068	2.40818	2745.85	0.0839248	small protein MntS
cysT	1.33155	0.413107	0.000351458	0.00391466	2.40731	242537	0.116001	tRNA-Cys(GCA)
modF	1.48669	0.572102	0.000355103	0.00394568	2.40388	159.661	0.183075	ABC family protein ModF
alaC	1.70856	0.772785	0.000372439	0.00410846	2.38632	71.4299	0.262982	glutamate&mdash;pyruvate aminotransferase AlaC
cheR	3.68601	1.88206	0.000378255	0.00416262	2.38063	120.713	0.732171	chemotaxis protein methyltransferase
galM	1.47537	0.561075	0.000403676	0.00440016	2.35653	216.424	0.181155	galactose-1-epimerase
ileU	1.29057	0.368008	0.000410357	0.00446239	2.35043	384491	0.111366	tRNA-Ile(GAU)
cspC	1.25691	0.329879	0.000423537	0.00459483	2.33773	4216.69	0.0988041	transcription antiterminator and regulator of mRNA stability CspC
fimI	2.24281	1.16531	0.000427233	0.00462399	2.33498	36.5979	0.430227	putative fimbrial protein FimI
dppD	1.98851	0.991688	0.000453183	0.00487039	2.31244	38.0977	0.361753	dipeptide ABC transporter ATP binding subunit DppD
putA	1.61599	0.692415	0.000464629	0.0049356	2.30666	96.607	0.23627	fused DNA-binding transcriptional repressor / proline dehydrogenase / 1-pyrroline-5-carboxylate dehydrogenase PutA
gpmA	1.21748	0.283903	0.000535281	0.00564691	2.24819	2643.67	0.0855181	2,3-bisphosphoglycerate-dependent phosphoglycerate mutase
galK	1.53324	0.616588	0.000541614	0.00568914	2.24495	134.538	0.209124	galactokinase
fdoI	1.32499	0.405986	0.000550769	0.00575735	2.23978	447.385	0.127885	formate dehydrogenase O subunit &gamma;
tsr	3.75301	1.90805	0.000574051	0.00598709	2.22278	985.375	0.793648	methyl-accepting chemotaxis protein Tsr
cheB	4.83266	2.27282	0.000584589	0.00608317	2.21587	76.5022	0.971481	CheB-P<SUP>asp</SUP> // protein-glutamate methylesterase/protein glutamine deamidase
phoH	1.33771	0.419762	0.000623199	0.00645567	2.19006	678.521	0.134524	ATP-binding protein PhoH
entE	1.55012	0.632382	0.00066924	0.00690145	2.16106	120.468	0.220585	2,3-dihydroxybenzoate-AMP ligase
fepA	1.45169	0.537734	0.000672629	0.00692084	2.15984	174.108	0.181472	ferric enterobactin outer membrane transporter
cheA	4.05172	2.01854	0.00067448	0.00692436	2.15962	610.187	0.876539	chemotaxis protein CheA // chemotaxis protein CheA(S)
nuoK	1.59493	0.673497	0.00073931	0.0075226	2.12363	100.814	0.241873	NADH:quinone oxidoreductase subunit K
sibE	1.24123	0.31177	0.00075913	0.00769017	2.11406	1995.06	0.0977241	small RNA SibE
crfC	2.7034	1.43478	0.000779784	0.00783973	2.1057	519.699	0.608382
ykgH	1.87117	0.903938	0.000792452	0.00794009	2.10017	49.8987	0.351539	uncharacterized protein YkgH
ilvC	1.75462	0.811158	0.00082004	0.00814538	2.08909	54.5088	0.307848	ketol-acid reductoisomerase (NADP<sup>+</sup>)
ilvB	1.5411	0.623957	0.000816573	0.00814538	2.08909	116.188	0.222651	acetohydroxy acid synthase I subunit IlvB
lolE	1.33548	0.417356	0.000938303	0.00920058	2.03618	286.381	0.139279	lipoprotein release complex - inner membrane subunit
tcyL	1.98761	0.991031	0.00104143	0.0100323	1.9986	35.5362	0.405439	cystine ABC transporter membrane subunit
rprA	1.486	0.571431	0.00107767	0.0102927	1.98747	138.214	0.206447	small regulatory RNA RprA
mltD	1.20783	0.272412	0.00107883	0.0102927	1.98747	3437.74	0.0870531	membrane-bound lytic murein transglycosylase D
glgX	1.64398	0.717192	0.0011046	0.0104948	1.97902	67.6842	0.274903	limit dextrin alpha-1,6-glucohydrolase
gltD	1.52429	0.608136	0.00113551	0.0107663	1.96793	124.636	0.22446	glutamate synthase subunit GltD
cdd	1.36064	0.444286	0.00114101	0.010796	1.96674	260.68	0.153277	cytidine/deoxycytidine deaminase
xdhB	3.68459	1.8815	0.00114747	0.0108348	1.96518	9.62601	0.849439	putative xanthine dehydrogenase FAD-binding subunit XdhB
betI	1.27953	0.355617	0.00115708	0.0109032	1.96245	608.427	0.118128	DNA-binding transcriptional repressor BetI
nmpC	1.42518	0.511143	0.00116663	0.0109706	1.95977	423.283	0.182062	DLP12 prophage; putative outer membrane porin NmpC
lrp	1.23766	0.307617	0.00118852	0.0111536	1.95258	1078.57	0.100513	DNA-binding transcriptional dual regulator Lrp
crl	1.2659	0.340166	0.0013101	0.0120822	1.91786	718.971	0.113744	RNA polymerase holoenzyme assembly factor Crl
yeiE	1.37524	0.45968	0.001327	0.0121792	1.91438	232.337	0.162083	DNA-binding transcriptional dual regulator YeiE
msrC	1.28684	0.363829	0.00136408	0.0124697	1.90415	542.378	0.12343	free methionine-(<i>R</i>)-sulfoxide reductase
ydiH	1.66153	0.732511	0.00145332	0.0132065	1.87921	69.3991	0.293752	uncharacterized protein YdiH
argV	1.26692	0.341329	0.00154097	0.0139203	1.85635	22983.7	0.115047	tRNA-Arg(ACG)
flgM	2.302	1.20289	0.00156061	0.0140424	1.85256	1859.42	0.553696	anti-sigma factor for FliA (&sigma;<sup>28</sup>)
ybiV	1.3307	0.412181	0.00169069	0.0151535	1.81949	326.691	0.146322	sugar phosphatase YbiV
yobA	1.35458	0.437841	0.00183362	0.0163706	1.78594	215.735	0.158966	copper-binding protein
sodA	1.2188	0.285464	0.0018974	0.0169072	1.77193	1769.61	0.0969338	superoxide dismutase (Mn)
fimC	2.01725	1.01239	0.00192825	0.0171487	1.76577	27.4769	0.466208	type 1 fimbriae periplasmic chaperone
yhbV	5.38563	2.42912	0.00207268	0.0182563	1.73859	5.50514	1.21803
ycdZ	1.32383	0.404718	0.00208744	0.0183511	1.73634	295.893	0.147	inner membrane protein YcdZ
cstA	1.50052	0.585463	0.00223465	0.019533	1.70923	88.8192	0.235187	pyruvate transporter CstA
mgsA	1.29095	0.368435	0.00242169	0.0210476	1.6768	334.439	0.133781	methylglyoxal synthase
mnaT	1.89009	0.918453	0.00251858	0.0218071	1.6614	27.5081	0.439148	L-amino acid N-acyltransferase
mtgA	1.48229	0.567829	0.00258946	0.0223365	1.65098	101.124	0.2322	peptidoglycan glycosyltransferase MtgA
motB	3.23864	1.69539	0.00260058	0.0223903	1.64994	436.909	1.04396	motility protein B
gcvH	1.59651	0.67492	0.00269813	0.0231002	1.63638	62.8053	0.294802	lipoyl-GcvH-protein // glycine cleavage system H protein
yfjW	1.52778	0.61144	0.00269172	0.0231002	1.63638	70.8856	0.257518	CP4-57 prophage; uncharacterized protein YfjW
yafY	2.26613	1.18023	0.00274229	0.0234346	1.63014	17.6216	0.618902	CP4-6 prophage; inner membrane lipoprotein YafY
galR	1.33665	0.418623	0.00278976	0.0237959	1.6235	225.362	0.158998	DNA-binding transcriptional dual regulator GalR
sgrS	1.57837	0.658433	0.00280826	0.0238926	1.62174	58.9369	0.285823	small regulatory RNA SgrS
exbB	1.20316	0.266825	0.00281672	0.0238926	1.62174	2332.53	0.0940047	Ton complex subunit ExbB
yobF	1.20009	0.26314	0.00281541	0.0238926	1.62174	4264.34	0.0925707	DUF2527 domain-containing protein YobF
lldR	1.5879	0.667117	0.00285925	0.0242087	1.61603	63.0846	0.292083	DNA-binding transcriptional dual regulator LldR
avtA	1.26453	0.3386	0.00287154	0.024268	1.61497	397.686	0.123626	valine&mdash;pyruvate aminotransferase
ffs	1.17299	0.230189	0.00288859	0.0243672	1.6132	159248	0.0801172	signal recognition particle 4.5S RNA
dppA	1.43889	0.524954	0.00291087	0.02451	1.61066	115.294	0.213652	dipeptide ABC transporter periplasmic binding protein
asd	1.31055	0.390174	0.00296599	0.0248828	1.6041	342.275	0.147056	aspartate-semialdehyde dehydrogenase
inaA	1.36529	0.449207	0.0030112	0.025216	1.59832	184.806	0.175062	putative lipopolysaccharide kinase InaA
yhbW	1.67004	0.739882	0.0030256	0.0252905	1.59704	45.28	0.34091	putative luciferase-like monooxygenase YhbW
gltI	1.38998	0.475061	0.00309864	0.0257602	1.58905	220.409	0.18863	glutamate/aspartate ABC transporter periplasmic binding protein
pgsA	1.35223	0.435342	0.00315003	0.0261402	1.58269	246.056	0.1697	CDP-diacylglycerol&mdash;glycerol-3-phosphate 3-phosphatidyltransferase
sroC	1.32299	0.403798	0.00315944	0.0261709	1.58218	462.543	0.154562	small regulatory RNA SroC
ptsP	1.22342	0.290916	0.0032954	0.0271989	1.56545	737.926	0.105549	PtsP-<i>N</i>-phospho-L-histidine // phosphoenolpyruvate-protein phosphotransferase PtsP
ydbK	1.30095	0.379562	0.00335363	0.0275803	1.5594	296.798	0.144287	putative pyruvate-flavodoxin oxidoreductase
flhE	1.38154	0.466276	0.00348433	0.0284007	1.54667	162.221	0.187507	flagellar protein FlhE
fixB	1.12156	0.165513	0.00350538	0.0284689	1.54563	2.36486	0.374813	putative electron transfer flavoprotein FixB
gloC	1.29376	0.37157	0.0036097	0.0290004	1.5376	328.118	0.142068	hydroxyacylglutathione hydrolase GloC
yfbP	1.96974	0.978007	0.00363676	0.0290751	1.53648	25.888	0.523816	uncharacterized protein YfbP
yehU	1.53978	0.622721	0.0037095	0.0294812	1.53045	65.5571	0.278659
ydjA	1.44873	0.534787	0.00371135	0.0294812	1.53045	134.568	0.22744	putative oxidoreductase YdjA
ptsH	1.23981	0.31012	0.00371969	0.0294812	1.53045	1116.04	0.115216	phosphocarrier HPr-<i>N</i><sup>&pi;</sup>-phospho-L-histidine // phosphocarrier protein HPr
add	1.36095	0.444618	0.00382965	0.0302483	1.5193	201.181	0.17968	adenosine deaminase
mglC	2.52109	1.33405	0.00396808	0.0311806	1.50611	11.6462	0.83252	D-galactose/methyl-galactoside ABC transporter membrane subunit
yrdA	1.3341	0.41587	0.00401189	0.031471	1.50209	261.528	0.166054	hexapeptide repeats-containing protein YrdA
yeeZ	1.32744	0.408647	0.00412487	0.032247	1.49151	302.185	0.162628	putative epimerase YeeZ
slt	1.39294	0.478138	0.00427604	0.0333154	1.47736	131.29	0.200168	soluble lytic murein transglycosylase
gcvP	1.42713	0.513121	0.00431067	0.0335283	1.47459	105.672	0.2205	glycine decarboxylase
fliQ	1.37175	0.456019	0.00446037	0.0344589	1.4627	158.739	0.189735	flagellar biosynthesis protein FliQ
dld	1.46793	0.553779	0.00453116	0.0348884	1.45732	112.414	0.246857	quinone-dependent D-lactate dehydrogenase
atpE	1.19638	0.258672	0.00466542	0.0357704	1.44648	1361.8	0.0964775	ATP synthase F<sub>o</sub> complex subunit c
gntT	1.38706	0.472027	0.00474749	0.03625	1.44069	143.164	0.200432	high-affinity gluconate transporter
rutG	3.42135	1.77457	0.00476416	0.0363168	1.43989	6.53409	1.55523	pyrimidine:H<sup>+</sup> symporter
yncD	1.23184	0.300809	0.00478907	0.0364462	1.43835	571.956	0.114907	putative TonB-dependent outer membrane receptor
fdhE	1.2436	0.314519	0.00482788	0.0366807	1.43556	586.137	0.121238	formate dehydrogenase formation protein
treB	1.74577	0.803867	0.00490358	0.0370631	1.43106	30.6005	0.433315	trehalose-specific PTS enzyme IIBC component
sstT	1.29481	0.372742	0.00491052	0.0370631	1.43106	247.863	0.149112	serine/threonine:Na+ symporter
kdpB	1.96043	0.971169	0.00493981	0.037223	1.42919	20.6719	0.573602	K<sup>+</sup> transporting P-type ATPase subunit KdpB
dhaR	1.45301	0.539047	0.00497015	0.0373902	1.42724	85.177	0.241816	DNA-binding transcriptional dual regulator DhaR
atpA	1.16345	0.218409	0.0051229	0.0382882	1.41693	4236.16	0.0810533	ATP synthase F<sub>1</sub> complex subunit &alpha;
lpd	1.17278	0.229933	0.00530026	0.0392305	1.40638	3780.24	0.0860918	lipoamide dehydrogenase
flxA	2.58677	1.37115	0.00578829	0.0423644	1.373	698.405	2.0845	Qin prophage; PF14282 family protein FlxA
puuA	1.27483	0.350305	0.00584068	0.0426797	1.36978	279.049	0.141633	glutamate-putrescine ligase
rihA	1.49079	0.576076	0.00585524	0.0427181	1.36939	85.6288	0.274345	pyrimidine-specific ribonucleoside hydrolase RihA
dppB	1.7173	0.780145	0.00595259	0.0432907	1.36361	30.3988	0.438117	dipeptide ABC transporter membrane subunit DppB
ydiJ	1.36718	0.4512	0.00597757	0.043323	1.36328	130.611	0.196618	putative FAD-linked oxidoreductase YdiJ
yfcL	1.28893	0.366174	0.00604086	0.0436559	1.35996	221.678	0.150468	PF08891 family protein YfcL
yodD	1.77198	0.825359	0.00612251	0.0441764	1.35481	24.8733	0.487183	stress-induced protein
nagK	1.32915	0.410501	0.00653235	0.0466931	1.33075	189.292	0.175986	<i>N</i>-acetyl-D-glucosamine kinase
aceA	1.43121	0.517239	0.00680227	0.0483214	1.31586	81.3452	0.243477	isocitrate lyase
ascF	1.60071	0.678709	0.0069406	0.0490649	1.30923	45.0646	0.36639	&beta;-glucoside specific PTS enzyme IIBC component
ydcI	1.29713	0.375322	0.00694831	0.0490649	1.30923	414.824	0.158691	DNA-binding transcriptional dual regulator YdcI
clsC	1.34871	0.431575	0.00708888	0.0498175	1.30262	128.155	0.190875	cardiolipin synthase C
borD	0.301481	-1.72986	8.51223e-34	3.25522e-31	30.4874	351.838	0.145392	DLP12 prophage; prophage lipoprotein BorD
insJK	0.47804	-1.0648	3.51222e-28	9.48094e-26	25.0231	1083.74	0.098667	IS150 protein InsAB
rrfB	0.474326	-1.07605	1.01139e-27	2.57849e-25	24.5886	1946.03	0.100636	5S ribosomal RNA
ydhS	0.3448	-1.53617	5.75067e-23	8.79661e-21	20.0557	475.577	0.160196	FAD/NAD(P) binding domain-containing protein YdhS
insJ	0.446202	-1.16423	2.99342e-22	4.30408e-20	19.3661	582.259	0.123266	insertion element IS150 protein InsA
mtlA	0.287467	-1.79853	3.77731e-22	5.25275e-20	19.2796	192.897	0.191568	mannitol-specific PTS enzyme IICBA component
plaP	0.491868	-1.02366	1.73065e-21	2.26912e-19	18.6441	2173.74	0.110407	putrescine:H+ symporter PlaP
yqaB	0.443855	-1.17184	3.18792e-19	3.11263e-17	16.5069	697.121	0.135002	fructose-1-phosphate phosphatase YqaB
cspH	0.524714	-0.930397	5.19901e-19	4.97047e-17	16.3036	1338.83	0.107462	CspA family protein CspH
ackA	0.58256	-0.779521	2.15415e-18	1.93831e-16	15.7126	1856.66	0.0914414	acetate kinase
insK	0.493788	-1.01803	8.43853e-18	7.17119e-16	15.1444	588.275	0.122289	IS150 conserved protein InsB
ybaA	0.460588	-1.11845	8.315e-18	7.17119e-16	15.1444	688.74	0.134691	DUF1428 domain-containing protein YbaA
dkgB	0.494411	-1.01622	3.05174e-16	2.33407e-14	13.6319	609.633	0.128975	methylglyoxal reductase DkgB
rho	0.603894	-0.727633	6.04819e-16	4.47664e-14	13.349	7411.29	0.0926279	transcription termination factor Rho
ydhR	0.527996	-0.921401	7.77235e-16	5.51582e-14	13.2584	4815.69	0.118424	putative monooxygenase YdhR
asnA	0.466875	-1.09889	2.78419e-15	1.90696e-13	12.7197	607.305	0.144844	asparagine synthetase A
opgE	0.535186	-0.901887	3.27281e-15	2.17666e-13	12.6622	975.225	0.118688	phosphoethanolamine transferase OpgE
intB	0.568845	-0.813891	6.55558e-15	4.23712e-13	12.3729	839.86	0.108115	KpLE2 phage-like element; putative integrase
htpG	0.479209	-1.06127	1.33744e-14	8.40753e-13	12.0753	947.073	0.143679	chaperone protein HtpG
tusB	0.357954	-1.48215	1.58571e-14	9.83357e-13	12.0073	229.232	0.202301	sulfurtransferase complex subunit TusB
secG	0.644423	-0.63392	3.27498e-14	1.98929e-12	11.7013	10449.4	0.086014	Sec translocon subunit SecG
mioC	0.607109	-0.719973	5.98393e-14	3.39016e-12	11.4698	1415.96	0.0991595	flavoprotein MioC
ygeQ	0.483251	-1.04916	7.25973e-14	4.01385e-12	11.3964	481.323	0.146557	putative lipoprotein YgeQ
fis	0.56524	-0.823065	2.77064e-13	1.47842e-11	10.8302	1178.96	0.11728	DNA-binding transcriptional dual regulator Fis
upp	0.513511	-0.961534	2.82271e-13	1.4889e-11	10.8271	618.992	0.137728	uracil phosphoribosyltransferase
dusB	0.636372	-0.652058	4.93312e-13	2.5436e-11	10.5946	5507.95	0.0932805	tRNA-dihydrouridine synthase B
pyrL	0.350896	-1.51088	8.25597e-13	4.16337e-11	10.3806	112.797	0.222829	<i>pyrBI</i> operon leader peptide
intS	0.517448	-0.950515	9.02687e-13	4.50264e-11	10.3465	580.824	0.139366	CPS-53 (KpLE1) prophage; prophage CPS-53 integrase
yifE	0.610653	-0.711575	1.62128e-12	7.91494e-11	10.1016	1384.75	0.104627
mtlD	0.476509	-1.06942	1.65993e-12	8.01834e-11	10.0959	280.405	0.159127	mannitol-1-phosphate 5-dehydrogenase
yfhR	0.502806	-0.991925	6.54682e-12	2.91683e-10	9.53509	273.706	0.151863	putative peptidase
dnaK	0.502293	-0.9934	6.71493e-12	2.96296e-10	9.52827	1993.72	0.1524	chaperone protein DnaK
pyrD	0.568606	-0.814499	1.00401e-11	4.34659e-10	9.36185	609.237	0.125293	dihydroorotate dehydrogenase, type 2
yghJ	0.521585	-0.939026	1.29788e-11	5.51478e-10	9.25847	295.983	0.145894	putative lipoprotein YghJ
mtlR	0.505304	-0.984776	1.29043e-11	5.51478e-10	9.25847	269.023	0.153115	transcriptional repressor MtlR
rpoH	0.653508	-0.613723	1.40605e-11	5.91961e-10	9.22771	7831.95	0.0941282	RNA polymerase sigma factor RpoH
nfuA	0.528157	-0.920962	2.1892e-11	8.89049e-10	9.05107	525.653	0.144846	iron-sulfur cluster carrier protein NfuA
yafT	0.485238	-1.04324	7.84682e-11	3.10423e-09	8.50805	333.061	0.170338	lipoprotein YafT
rplM	0.708358	-0.49745	1.0469e-10	4.0714e-09	8.39026	16118.7	0.0794315	50S ribosomal subunit protein L13
bhsA	0.50063	-0.998182	1.07513e-10	4.14603e-09	8.38237	276.876	0.163745	DUF1471 domain-containing multiple stress resistance outer membrane protein BhsA
adeP	0.586951	-0.768687	1.1309e-10	4.32474e-09	8.36404	447.299	0.125181	adenine:H<sup>+</sup> symporter
dnaJ	0.511032	-0.968515	1.7245e-10	6.48665e-09	8.18798	393.746	0.161031	chaperone protein DnaJ
cydA	0.551258	-0.8592	2.12872e-10	7.94202e-09	8.10007	715.269	0.142975	cytochrome <i>bd</i>-I subunit 1
tsgA	0.57756	-0.791958	3.17273e-10	1.15553e-08	7.93722	463.52	0.132777	putative transporter TsgA
fadL	0.611271	-0.710116	4.03495e-10	1.44659e-08	7.83965	637.36	0.119252	long-chain fatty acid outer membrane channel / bacteriophage T2 receptor
sugE	0.595842	-0.746998	4.74236e-10	1.67405e-08	7.77623	441.89	0.126287
fabB	0.634575	-0.656137	5.87865e-10	2.04372e-08	7.68958	1447.58	0.110999	3-oxoacyl-[acyl carrier protein] synthase 1
gadX	0.41827	-1.25749	1.16617e-09	3.99369e-08	7.39863	152.905	0.222808	DNA-binding transcriptional dual regulator GadX
groL	0.553291	-0.853891	1.31465e-09	4.4036e-08	7.35619	1763.84	0.149571	chaperonin GroEL
suhB	0.660091	-0.599264	1.50286e-09	4.92615e-08	7.30749	4810.45	0.103617	Nus factor SuhB
pdeA	0.550834	-0.86031	1.63387e-09	5.24323e-08	7.2804	759.085	0.151856	putative c-di-GMP phosphodiesterase PdeA
tsx	0.6279	-0.671393	2.04406e-09	6.4691e-08	7.18916	985.63	0.117861	nucleoside-specific channel-forming protein Tsx
aslB	0.53629	-0.898916	2.2748e-09	7.15003e-08	7.14569	288.069	0.160558	putative anaerobic sulfatase maturation enzyme AslB
rttR	0.642276	-0.638735	3.43942e-09	1.04526e-07	6.98077	852.668	0.113613	small RNA RttR
proS	0.64942	-0.622776	3.94525e-09	1.18332e-07	6.9269	887.03	0.111078	proline&mdash;tRNA ligase
ynfS	0.649266	-0.623118	3.98121e-09	1.18635e-07	6.92579	1522.33	0.111184	Qin prophage; protein YnfS
cspF	0.672677	-0.572015	5.6103e-09	1.66101e-07	6.77963	1971.2	0.102686	Qin prophage; cold shock-like protein CspF
rpsI	0.715616	-0.482742	7.53439e-09	2.20225e-07	6.65713	13576.1	0.0868083	30S ribosomal subunit protein S9
recA	0.714607	-0.484779	9.47421e-09	2.73441e-07	6.56314	3343.75	0.0876781	DNA recombination/repair protein RecA
guaB	0.655847	-0.608569	1.21044e-08	3.45014e-07	6.46216	1130.89	0.112369	inosine 5'-monophosphate dehydrogenase
gpt	0.630288	-0.665917	1.4828e-08	4.20036e-07	6.37671	477.467	0.124389	xanthine-guanine phsophoribosyltransferase
ysgD	0.624557	-0.679096	1.6667e-08	4.69234e-07	6.32861	491.925	0.127433	protein YsgD
pinR	0.577382	-0.792403	1.7692e-08	4.95053e-07	6.30535	642.683	0.150569	Rac prophage; putative site-specific recombinase
lpxT	0.635191	-0.654737	1.83181e-08	5.09466e-07	6.29288	606.173	0.123156	lipid A-core phosphotransferase
tpr	0.658047	-0.603739	2.18499e-08	6.00413e-07	6.22155	667.156	0.113649	protamine-like protein
tufB	0.737334	-0.43961	3.83138e-08	1.03425e-06	5.98538	15920	0.0829283	translation elongation factor Tu 2
hslU	0.612686	-0.70678	3.99892e-08	1.07316e-06	5.96934	484.424	0.137287	ATPase component of the HslVU protease
ibpA	0.430985	-1.21429	4.03593e-08	1.0768e-06	5.96787	183.31	0.242609	small heat shock protein IbpA
yjeV	0.388384	-1.36444	4.18677e-08	1.11058e-06	5.95445	77.9869	0.27312	uncharacterized protein YjeV
rplY	0.68889	-0.537655	4.26372e-08	1.11807e-06	5.95153	3082.93	0.103015	50S ribosomal subunit protein L25
nsrR	0.720216	-0.473498	4.61095e-08	1.20225e-06	5.92	2921.39	0.090196	DNA-binding transcriptional regulator NsrR
bcsE	0.644112	-0.634617	6.14572e-08	1.56682e-06	5.80498	1088.19	0.124392	c-di-GMP-binding protein BcsE
rplJ	0.720951	-0.472026	6.86319e-08	1.73051e-06	5.76183	16609	0.0911653	50S ribosomal subunit protein L10
dinI	0.648603	-0.624593	1.379e-07	3.34828e-06	5.47518	578.943	0.126119	DNA damage-inducible protein I
yoeI	0.477602	-1.06612	1.40762e-07	3.39977e-06	5.46855	143.104	0.222542	uncharacterized protein YoeI
rplK	0.75199	-0.411215	1.43931e-07	3.45812e-06	5.46116	6307.51	0.0809398	50S ribosomal subunit protein L11
ysaE	0.70999	-0.494129	1.59983e-07	3.82376e-06	5.41751	1692.1	0.0988132	protein YsaE
hslV	0.539092	-0.891396	1.78122e-07	4.21342e-06	5.37537	206.224	0.186232	peptidase component of the HslVU protease
codB	0.355257	-1.49306	2.4937e-07	5.7796e-06	5.2381	61.5161	0.324546	cytosine transporter
purH	0.485057	-1.04377	3.02183e-07	6.86494e-06	5.16336	159.392	0.225335	bifunctional AICAR transformylase/IMP cyclohydrolase
rpmF	0.754855	-0.405729	3.91758e-07	8.76964e-06	5.05702	5533.77	0.0830262	50S ribosomal subunit protein L32
rfaH	0.660682	-0.597972	3.97526e-07	8.85556e-06	5.05278	472.207	0.125758	transcription antiterminator RfaH
acrR	0.604652	-0.725822	4.21209e-07	9.33781e-06	5.02976	427.187	0.155344	DNA-binding transcriptional repressor AcrR
ybgE	0.60113	-0.734251	4.27134e-07	9.42365e-06	5.02578	427.405	0.157402	PF09600 family protein YbgE
cadC	0.590231	-0.760648	4.71754e-07	1.02601e-05	4.98885	259.103	0.164113	DNA-binding transcriptional activator CadC
yebF	0.633589	-0.658382	7.06139e-07	1.51135e-05	4.82063	331.275	0.142921	secreted protein YebF
rplA	0.74603	-0.422695	7.80887e-07	1.6438e-05	4.78415	9611.29	0.0892148	50S ribosomal subunit protein L1
yjaA	0.639445	-0.645108	8.62321e-07	1.79872e-05	4.74504	548.363	0.141257	stress response protein
rpsI_3'	0.710507	-0.49308	8.86304e-07	1.84038e-05	4.73509	2767.95	0.105733
rplL	0.757708	-0.400287	1.14706e-06	2.31889e-05	4.63472	21848.5	0.0855957	50S ribosomal subunit protein L7 // 50S ribosomal subunit protein L12
rapA	0.704241	-0.505859	1.23423e-06	2.4733e-05	4.60672	711.356	0.110405	RNA polymerase-binding ATPase and RNAP recycling factor
grpE	0.679908	-0.556589	1.22911e-06	2.4733e-05	4.60672	1771.75	0.122461	nucleotide exchange factor GrpE
yfhL	0.604319	-0.726617	1.49559e-06	2.98403e-05	4.5252	267.599	0.164913	putative 4Fe-4S cluster-containing protein YfhL
ibpB	0.433723	-1.20515	1.54255e-06	3.0512e-05	4.51553	115.752	0.283885	small heat shock protein IbpB
mgtA	0.65514	-0.610125	1.59368e-06	3.13879e-05	4.50324	563.414	0.136895	Mg<sup>2+</sup> importing P-type ATPase
rnr	0.750432	-0.414207	1.75047e-06	3.40377e-05	4.46804	3405.84	0.0905	RNase R
yhcN	0.72386	-0.466218	1.8372e-06	3.54643e-05	4.45021	1119.06	0.102947	DUF1471 domain-containing stress-induced protein YhcN
pyrC	0.630147	-0.666239	1.83929e-06	3.54643e-05	4.45021	406.1	0.15176	dihydroorotase
rcnA	0.474644	-1.07508	1.93824e-06	3.72159e-05	4.42927	91.1711	0.254842	Ni<sup>2+</sup>/Co<sup>2+</sup> exporter
dksA	0.721563	-0.470803	2.16883e-06	4.1127e-05	4.38587	1909.68	0.10494	RNA polymerase-binding transcription factor DksA
rpmH	0.771595	-0.374084	2.35796e-06	4.43471e-05	4.35313	10597.2	0.0823464	50S ribosomal subunit protein L34
ybfE	0.632967	-0.659797	2.44977e-06	4.55142e-05	4.34185	399.101	0.15229	ribbon-helix-helix domain-containing protein YbfE
trmA	0.723727	-0.466483	2.47643e-06	4.58239e-05	4.33891	837.02	0.104531	tRNA m<sup>5</sup>U54 methyltransferase
spf	0.773719	-0.370118	2.5727e-06	4.72245e-05	4.32583	84942.8	0.0825275	small regulatory RNA Spot 42
stpA	0.541281	-0.885551	2.69774e-06	4.93225e-05	4.30696	188.606	0.21103	DNA-binding transcriptional repressor StpA with RNA chaperone activity
yceD	0.787412	-0.344809	3.50274e-06	6.30355e-05	4.20041	11958.7	0.0770299	DUF177 domain-containing protein YceD
rsmH	0.684063	-0.547799	4.06621e-06	7.289e-05	4.13733	575.033	0.127686	16S rRNA m<sup>4</sup>C1402 methyltransferase
rimP	0.756108	-0.403335	4.34999e-06	7.76736e-05	4.10973	1925.04	0.091793	ribosome maturation factor RimP
ynfR	0.647882	-0.626196	6.89178e-06	0.00011757	3.9297	485.509	0.152245	Qin prophage; protein YnfR
dnaG	0.764538	-0.38734	7.59958e-06	0.000129056	3.88922	2489.98	0.0905008	DNA primase
frmA	0.632507	-0.660847	9.78904e-06	0.000163352	3.78687	280.46	0.164894	<i>S</i>-(hydroxymethyl)glutathione dehydrogenase
gcvB	0.782071	-0.354629	9.83192e-06	0.000163474	3.78655	24199.6	0.0835607	small regulatory RNA GcvB
pal	0.768603	-0.37969	1.10596e-05	0.000181908	3.74015	1977.31	0.09032	peptidoglycan-associated outer membrane lipoprotein Pal
rhoL	0.663309	-0.592248	1.1664e-05	0.000190888	3.71922	5122.55	0.147518	<i>rho</i> operon leader peptide
ynfN	0.678678	-0.5592	1.1882e-05	0.000192674	3.71518	512.113	0.13861	Qin prophage; protein YnfN
waaA	0.677247	-0.562247	1.26515e-05	0.000202999	3.69251	491.749	0.139907	KDO transferase
rluA	0.665237	-0.588059	1.38538e-05	0.000221516	3.6546	259.928	0.147777	23S rRNA pseudouridine<sup>746</sup> and tRNA pseudouridine<sup>32</sup> synthase
bax	0.760604	-0.394783	1.42248e-05	0.000226659	3.64463	3391.77	0.0955518	putative glycoside hydrolase Bax
iscR	0.618533	-0.693078	1.44418e-05	0.000229319	3.63956	376.48	0.177868	DNA-binding transcriptional dual regulator IscR
efp	0.761864	-0.392395	1.75938e-05	0.00027745	3.55682	3501.23	0.0960813	protein chain elongation factor EF-P, &beta;-lysyl-Lys34 // protein chain elongation factor EF-P
hpt	0.711229	-0.491614	1.76958e-05	0.000278103	3.55579	556.561	0.123029	hypoxanthine phosphoribosyltransferase
uraA	0.579287	-0.787651	1.82534e-05	0.000285887	3.54381	146.762	0.208321	uracil:H<sup>+</sup> symporter UraA
pta	0.738471	-0.437387	1.883e-05	0.000292919	3.53325	983.832	0.108547	phosphate acetyltransferase
metK	0.696239	-0.522345	1.89534e-05	0.000293842	3.53189	638.212	0.132206	methionine adenosyltransferase
aceK-int	0.65272	-0.615464	1.9141e-05	0.000295751	3.52907	377.072	0.158809
pinQ	0.675078	-0.566873	2.17713e-05	0.000333029	3.47752	675.223	0.14606	Qin prophage; putative recombinase PinQ
rluC	0.733052	-0.448013	2.21496e-05	0.000337689	3.47148	632.017	0.112548	23S rRNA pseudouridine<sup>955/2504/2580</sup> synthase
xanP	0.499294	-1.00204	2.43669e-05	0.000369041	3.43293	84.9372	0.277241	xanthine:H+ symporter XanP
groS	0.639961	-0.643944	2.61389e-05	0.000394577	3.40387	658.233	0.17045	cochaperonin GroES
yegD	0.609656	-0.713933	2.69963e-05	0.000406184	3.39128	151.969	0.191251	HSP70 family protein YegD
lon	0.724475	-0.464992	2.80599e-05	0.000418074	3.37875	1634.44	0.119051	Lon protease
G0-10705	0.626591	-0.674405	2.87598e-05	0.000427116	3.36945	225.91	0.180317
asnC	0.645541	-0.631419	2.92053e-05	0.000432332	3.36418	230.33	0.167903	DNA-binding transcriptional dual regulator AsnC
rcnB	0.542721	-0.881718	3.14585e-05	0.000464189	3.3333	109.008	0.244824	periplasmic protein involved in nickel/cobalt export
rlmG	0.678789	-0.558965	3.20752e-05	0.000470265	3.32766	335.271	0.147417	23S rRNA m<sup>2</sup>G1835 methyltransferase
ynfQ	0.703402	-0.50758	3.31058e-05	0.000483829	3.31531	1219.49	0.131926	Qin prophage; protein YnfQ
mltF	0.693805	-0.527399	3.37895e-05	0.000492254	3.30781	314.506	0.138442	membrane-bound lytic murein transglycosylase F
mngR	0.650636	-0.620078	3.41262e-05	0.000495585	3.30488	203.556	0.16595	DNA-binding transcriptional repressor MngR
ybeD	0.625858	-0.676093	3.46434e-05	0.00050151	3.29972	219.961	0.183498	DUF493 domain-containing protein YbeD
plsX	0.715903	-0.482164	3.51781e-05	0.000507649	3.29444	6920.03	0.125288	putative phosphate acyltransferase
sroA	0.717805	-0.478336	3.62822e-05	0.000518689	3.28509	1000.27	0.125026	small RNA SroA
pqqL	0.598027	-0.741717	3.94522e-05	0.000558785	3.25276	132.847	0.205403	periplasmic metalloprotease
tadA	0.653685	-0.613332	4.05164e-05	0.000572091	3.24253	268.537	0.166187	tRNA adenosine<sup>34</sup> deaminase
hupA	0.763486	-0.389326	4.06808e-05	0.000572651	3.24211	2675.43	0.10017	DNA-binding protein HU-&alpha;
tpke11	0.590723	-0.759445	4.73107e-05	0.000663941	3.17787	161.105	0.214123
erpA	0.735214	-0.443763	5.07388e-05	0.000709879	3.14882	672.291	0.117361	iron-sulfur cluster insertion protein ErpA
rnpA	0.808201	-0.307215	5.11021e-05	0.000712789	3.14704	6082.29	0.0786134	RNase P protein component
kup	0.699696	-0.5152	5.70591e-05	0.000791071	3.10178	294.396	0.139732	K<sup>+</sup>:H<sup>+</sup> symporter Kup
tolC	0.792091	-0.336261	5.93749e-05	0.000818232	3.08712	1993.26	0.0874599	outer membrane channel TolC
pyrG	0.770691	-0.375775	8.02598e-05	0.00108038	2.96642	4861.8	0.100738	CTP synthetase
opgC	0.69607	-0.522696	8.22803e-05	0.00110083	2.95828	402.804	0.14596	osmoregulated periplasmic glucans (OPG) biosynthesis protein C
sixA	0.731487	-0.451096	8.51867e-05	0.0011364	2.94447	420.013	0.123891	phosphohistidine phosphatase SixA
rplI	0.783046	-0.352832	8.56263e-05	0.00113895	2.94349	7275.54	0.0942763	50S ribosomal subunit protein L9
yeeE	0.430941	-1.21444	8.5906e-05	0.00113937	2.94333	38.8634	0.376867
yfdF	0.464344	-1.10673	8.72742e-05	0.00114757	2.94022	49.6887	0.340819	protein YfdF
ecnA	0.64858	-0.624644	9.21249e-05	0.00120445	2.91921	203.058	0.180233	entericidin A lipoprotein, antidote to entericidin B
cpoB	0.790184	-0.339739	9.37531e-05	0.00121879	2.91407	1624.57	0.0911418	cell division coordinator CpoB
dgcI	0.658467	-0.602816	9.57232e-05	0.00124089	2.90627	233.689	0.173856	putative diguanylate cyclase DgcI
tufA	0.808808	-0.306131	0.000104821	0.00133248	2.87534	15412.3	0.082092	translation elongation factor Tu 1
baxL	0.697233	-0.520287	0.000104211	0.00133248	2.87534	419.524	0.147926	putative translational regulatory protein BaxL
rpsU	0.808158	-0.307291	0.00011084	0.00140122	2.85349	14192.1	0.0827854	30S ribosomal subunit protein S21
rph	0.7323	-0.449493	0.000118727	0.00148863	2.82721	439.788	0.126455	truncated RNase PH
zapA	0.760917	-0.394189	0.000125518	0.00156098	2.8066	3549.76	0.109641	cell division protein ZapA
cydB	0.716668	-0.480623	0.00012702	0.00157539	2.80261	389.476	0.137075	cytochrome <i>bd</i>-I subunit 2
cpxP	0.757601	-0.400489	0.000140611	0.00172993	2.76197	12012.1	0.110706	periplasmic protein CpxP
ylaC	0.79289	-0.334807	0.000141879	0.00173991	2.75947	1792.1	0.0923606	putative inner membrane protein
lipB	0.699921	-0.514737	0.000142181	0.00173991	2.75947	276.758	0.149653	lipoyl(octanoyl) transferase
yjaH	0.763473	-0.389352	0.000147251	0.0017924	2.74657	1146.85	0.109438	DUF1481 domain-containing protein YjaH
ompT	0.801627	-0.318997	0.000147677	0.00179283	2.74646	4250.61	0.0878822	DLP12 prophage; omptin family outer membrane protease OmpT
gnsA	0.777252	-0.363545	0.000150044	0.00181676	2.7407	1210.64	0.101502	putative phosphatidylethanolamine synthesis regulator GnsA
rpsB	0.798092	-0.325372	0.000152497	0.0018416	2.7348	8202.24	0.0899667	30S ribosomal subunit protein S2
rsmG	0.747144	-0.420541	0.000172193	0.00206317	2.68546	445.841	0.120652	16S rRNA m<sup>7</sup>G527 methyltransferase
bssS	0.782249	-0.354301	0.000174258	0.00208247	2.68142	1686.37	0.0997667	regulator of biofilm formation
yqeI	0.581297	-0.782652	0.00017647	0.00210343	2.67707	89.533	0.24766	putative transcriptional regulator YqeI
pheP	0.73902	-0.436314	0.000179624	0.00213548	2.6705	415.956	0.126248	phenylalanine:H+ symporter PheP
dinD	0.7083	-0.497567	0.000182967	0.00216401	2.66474	293.285	0.146937	DNA damage-inducible protein D
proP	0.787445	-0.344748	0.000211127	0.00246529	2.60813	1977	0.098241	osmolyte:H<sup>+</sup> symporter ProP
rimO	0.71539	-0.483198	0.00021176	0.00246641	2.60793	354.532	0.143757	ribosomal protein S12 methylthiotransferase RimO
rplS	0.818481	-0.28898	0.000232805	0.00269783	2.56898	4280.78	0.081641	50S ribosomal subunit protein L19
iscS	0.743682	-0.427242	0.000234438	0.00270991	2.56705	829.623	0.125537	cysteine desulfurase IscS
nusG	0.777964	-0.362224	0.000272465	0.00311601	2.5064	1227.73	0.105971	transcription termination/antitermination factor NusG
fxsA	0.554922	-0.849643	0.00027266	0.00311601	2.5064	74.9243	0.284873	protein FxsA
pykF	0.797092	-0.327182	0.000275767	0.00314019	2.50304	3344.08	0.0946775	pyruvate kinase 1
ecnB	0.710647	-0.492795	0.000284204	0.00322825	2.49103	375.254	0.150806	bacteriolytic entericidin B lipoprotein
cutA	0.677414	-0.56189	0.000290524	0.00329189	2.48256	232.379	0.176414	copper binding protein CutA
pmrR	0.657528	-0.604875	0.000296791	0.00334637	2.47543	182.252	0.192284	small regulatory membrane protein PmrR
pppA	0.573749	-0.80151	0.000296257	0.00334637	2.47543	91.6922	0.268403	prepilin peptidase
yghF	0.3779	-1.40392	0.000314604	0.00353852	2.45118	23.4695	0.508999	putative type II secretion system C-type protein YghF
ribB	0.808269	-0.307093	0.000345041	0.00387138	2.41213	2231.3	0.0898065	3,4-dihydroxy-2-butanone-4-phosphate synthase
mnmG	0.798825	-0.324049	0.000368314	0.00407276	2.39011	1444.11	0.0958876	5-carboxymethylaminomethyluridine-tRNA synthase subunit MnmG
pdeC	0.524958	-0.929727	0.000368243	0.00407276	2.39011	55.1481	0.327516	c-di-GMP phosphodiesterase PdeC
rplQ	0.825525	-0.276615	0.000382712	0.00419156	2.37762	8517.95	0.0809454	50S ribosomal subunit protein L17
ydfR	0.657928	-0.603998	0.000382432	0.00419156	2.37762	140.471	0.196818	Qin prophage; protein YdfR
mutM	0.631643	-0.662819	0.00039676	0.00433508	2.363	112.228	0.220968	DNA-formamidopyrimidine glycosylase
iscA	0.719498	-0.474937	0.000428487	0.00462666	2.33473	325.074	0.150013	iron-sulfur cluster insertion protein IscA
hda	0.768651	-0.379599	0.000440645	0.00474677	2.3236	609.053	0.116199	inibitor of reinitiation of DNA replication
guaC	0.775421	-0.366949	0.00045707	0.00490068	2.30974	703.75	0.112157	GMP reductase
cvpA	0.691448	-0.532308	0.000458151	0.00490083	2.30973	209.338	0.172591	colicin V production protein
argS	0.783575	-0.351856	0.000462273	0.00493343	2.30685	917.061	0.107166	arginine&mdash;tRNA ligase
gmk	0.80828	-0.307073	0.000464054	0.0049356	2.30666	2112.34	0.0921813	guanylate kinase
codA	0.586596	-0.769561	0.000517388	0.00548335	2.26095	71.5553	0.271628	cytosine/isoguanine deaminase
dgcN	0.674272	-0.568598	0.000533256	0.00563851	2.24884	182.362	0.189918	diguanylate cyclase DgcN
frmR	0.694689	-0.525562	0.000541763	0.00568914	2.24495	267.157	0.17322	DNA-binding transcriptional repressor FrmR
guaA	0.774695	-0.3683	0.000544374	0.0057035	2.24386	629.218	0.114466	GMP synthetase
nhaR	0.68544	-0.544898	0.000619053	0.00642722	2.19198	159.748	0.182988	DNA-binding transcriptional activator NhaR
queD	0.732906	-0.4483	0.000640455	0.00661947	2.17918	354.884	0.145883	6-carboxy-5,6,7,8-tetrahydropterin synthase
murE	0.743962	-0.4267	0.000683587	0.00700219	2.15477	535.442	0.138644	UDP-N-acetylmuramoyl-L-alanyl-D-glutamate--2,6-diaminopimelate ligase
pepB	0.695275	-0.524345	0.000685796	0.00700917	2.15433	192.32	0.17668	aminopeptidase B
epmA	0.764063	-0.388237	0.00073012	0.0074456	2.1281	471.532	0.124895	EF-P-lysine lysyltransferase
yegQ	0.747277	-0.420286	0.000752705	0.00764195	2.1168	352.333	0.137407
rpoZ	0.811993	-0.300461	0.000769443	0.00777748	2.10916	1417.86	0.0940203	RNA polymerase subunit &omega;
yihI	0.671915	-0.57365	0.000776439	0.00783094	2.10619	124.777	0.199472	Der GTPase-activating protein YihI
rlmN	0.788779	-0.342308	0.000780727	0.00783973	2.1057	699.436	0.10888	23S rRNA m<sup>2</sup>A2503 methyltransferase/tRNA m<sup>2</sup>A37 methyltransferase
yccA	0.811365	-0.301577	0.000811625	0.00811448	2.09074	4137.26	0.0948908	modulator of FtsH protease
maa	0.772748	-0.371931	0.000818964	0.00814538	2.08909	1258.86	0.120294	maltose <i>O</i>-acetyltransferase
tff	0.809527	-0.304849	0.000849819	0.00842294	2.07454	5438.92	0.0964327	putative small RNA T44
rnc	0.806324	-0.310568	0.000855563	0.00842921	2.07421	1150.53	0.0984945	RNase III
yhiN	0.72066	-0.472609	0.000855963	0.00842921	2.07421	249.169	0.15962	putative oxidoreductase YhiN
emrA	0.710687	-0.492713	0.000854587	0.00842921	2.07421	192.031	0.167917	multidrug efflux pump membrane fusion protein EmrA
rplU	0.842126	-0.247893	0.000886671	0.00871292	2.05984	17939.2	0.0772451	50S ribosomal subunit protein L21
corA	0.74154	-0.431403	0.000964263	0.00943497	2.02526	258.442	0.14525	Ni<sup>2+</sup>/Co<sup>2+</sup>/Mg<sup>2+</sup> transporter
metJ	0.754888	-0.405666	0.000966339	0.00943517	2.02525	358.007	0.135253	DNA-binding transcriptional repressor MetJ
gyrA	0.835219	-0.259774	0.00097182	0.00946854	2.02372	3356.41	0.0821245	DNA gyrase subunit A
apt	0.770615	-0.375917	0.000988425	0.00960992	2.01728	530.16	0.125013	adenine phosphoribosyltransferase
gnsB	0.775259	-0.367249	0.0010245	0.00993962	2.00263	604.805	0.121274	Qin prophage; protein GnsB
thiM	0.688916	-0.537601	0.00102999	0.00997181	2.00123	150.104	0.190602	hydroxyethylthiazole kinase
yhbY	0.817418	-0.290854	0.0010339	0.00998855	2.0005	1639.69	0.0932563	ribosome assembly factor YhbY
yhbX	0.625656	-0.676558	0.0010428	0.0100323	1.9986	85.2732	0.254208	putative hydrolase YhbX
rpsD	0.83894	-0.25336	0.00104832	0.0100643	1.99721	15165.7	0.0804401	30S ribosomal subunit protein S4
purL	0.67211	-0.573231	0.00106851	0.0102367	1.98984	128.837	0.207533	phosphoribosylformylglycinamide synthetase
rpmA	0.840453	-0.25076	0.00110417	0.0104948	1.97902	10951.8	0.079905	50S ribosomal subunit protein L27
waaZ	0.75286	-0.409547	0.00122527	0.011475	1.94025	423.807	0.140322	lipopolysaccharide core biosynthesis protein WaaZ
ycjW	0.647623	-0.626773	0.00123292	0.0115232	1.93843	93.4758	0.235665	DNA-binding transcriptional repressor YcjW
tsf	0.836828	-0.256997	0.00124296	0.0115933	1.93579	10235.6	0.0828945	protein chain elongation factor EF-Ts
coaA	0.781798	-0.355133	0.00125009	0.0116363	1.93419	1032.2	0.119057	pantothenate kinase
rpmB	0.833433	-0.262862	0.00126477	0.011749	1.93	12233	0.0863079	50S ribosomal subunit protein L28
rrfA	0.733475	-0.44718	0.00127319	0.0118034	1.92799	804.887	0.156504	5S ribosomal RNA
galU	0.803225	-0.316123	0.00130044	0.0120317	1.91967	1058.33	0.104815	UTP&mdash;glucose-1-phosphate uridylyltransferase
murF	0.769339	-0.378309	0.00131116	0.0120822	1.91786	444.204	0.128777	D-alanyl-D-alanine-adding enzyme
purC	0.604413	-0.726394	0.00132351	0.0121715	1.91465	75.4388	0.286903	phosphoribosylaminoimidazole-succinocarboxamide synthase
yqgC	0.83863	-0.253893	0.00135016	0.0123671	1.90773	3.50919	0.481848	protein YqgC
priB	0.819442	-0.287287	0.00138744	0.012658	1.89764	3884.88	0.0946902	primosomal replication protein N
tig	0.840128	-0.251319	0.00142592	0.0129832	1.88662	9729.9	0.082006	trigger factor
yfaZ	0.576954	-0.793472	0.00152521	0.0138324	1.8591	53.4498	0.32834	putative porin YfaZ
pheU	0.788355	-0.343083	0.00153671	0.0139092	1.8567	241493	0.119111	tRNA-Phe(GAA)
uvrY	0.80348	-0.315666	0.00155059	0.0139797	1.8545	673.252	0.106422	DNA-binding transcriptional activator UvrY-phosphorylated // DNA-binding transcriptional activator UvrY
yecF	0.749588	-0.415831	0.00165873	0.0148961	1.82693	388.263	0.14779	DUF2594 domain-containing protein YecF
dacA	0.81236	-0.299809	0.00179903	0.016093	1.79336	948.826	0.102048	D-alanyl-D-alanine carboxypeptidase DacA
ybiI	0.687361	-0.54086	0.00196398	0.0174327	1.75864	129.619	0.209138	zinc finger domain-containing protein YbiI
yghG	0.560212	-0.835954	0.00198355	0.0175724	1.75517	45.3422	0.368299	lipoprotein YghG
pyrB	0.462785	-1.11159	0.00200286	0.0177093	1.7518	20.9601	0.526462	aspartate carbamoyltransferase catalytic subunit
yajG	0.771553	-0.374162	0.0020549	0.0181345	1.74149	364.389	0.13366	putative lipoprotein YajG
pitA	0.81652	-0.29244	0.00216507	0.0189971	1.72131	1443.72	0.101341	metal phosphate:H<sup>+</sup> symporter PitA
ygcN	0.701499	-0.511487	0.00221202	0.0193721	1.71282	153.764	0.197873	putative oxidoreductase with FAD/NAD(P)-binding domain
rlmC	0.737891	-0.43852	0.00231431	0.0201908	1.69485	189.056	0.164141	23S rRNA m<sup>5</sup>U747 methyltransferase
ssb	0.818717	-0.288563	0.00239553	0.0208597	1.68069	1100.16	0.100895	ssDNA-binding protein
serU	0.816191	-0.293022	0.00244277	0.0211907	1.67385	66223.6	0.102732	tRNA-Ser(CGA)
pspA	0.699161	-0.516304	0.0025258	0.0218284	1.66098	241.594	0.203993	phage shock protein A
ydeA	0.64942	-0.622777	0.00269393	0.0231002	1.63638	89.1009	0.26384	L-arabinose exporter
gluQ	0.788393	-0.343013	0.00295043	0.0247977	1.60559	526.73	0.126077	glutamyl-Q tRNA<sup>Asp</sup> synthetase
rlmH	0.780754	-0.35706	0.00305083	0.025455	1.59423	400.27	0.132873	23S rRNA m<sup>3</sup>&Psi;1915 methyltransferase
purM	0.654367	-0.611828	0.00308264	0.0256737	1.59051	69.7125	0.263076	phosphoribosylformylglycinamide cyclo-ligase
ispZ	0.783499	-0.351998	0.0031745	0.0262483	1.5809	1613.9	0.131195
rne	0.843585	-0.245395	0.00333126	0.0274456	1.56153	3311.27	0.0871338	ribonuclease E
purB	0.773844	-0.369886	0.00338677	0.027803	1.55591	321.818	0.140353	adenylosuccinate lyase
yccE	0.37022	-1.43354	0.00340172	0.0278758	1.55477	11.0686	0.824976	uncharacterized protein YccE
omrB	0.769445	-0.37811	0.00342762	0.0280381	1.55225	804.175	0.144485	small regulatory RNA OmrB
yhjY	0.589511	-0.76241	0.00344275	0.0281117	1.55111	45.3768	0.366044	putative outer membrane protein YhjY
rlmF	0.700349	-0.513854	0.00349306	0.0284213	1.54636	108.53	0.213419	23S rRNA m<sup>6</sup>A1618 methyltransferase
rrrQ	0.705618	-0.50304	0.00351131	0.0284689	1.54563	119.671	0.207777	Qin prophage; putative lysozyme
nrdB	0.795488	-0.330088	0.00353856	0.0285888	1.5438	534.886	0.124769	ribonucleoside-diphosphate reductase 1 subunit &beta;
queG	0.794037	-0.332721	0.00353749	0.0285888	1.5438	498.182	0.124415	epoxyqueuosine reductase
znuC	0.764628	-0.38717	0.00355536	0.0286741	1.54251	255.085	0.149428	Zn<sup>2+</sup> ABC transporter ATP binding subunit
trmJ	0.822397	-0.282093	0.0036064	0.0290004	1.5376	930.092	0.10324	tRNA Cm32/Um32 methyltransferase
sdiA	0.779974	-0.358502	0.0036211	0.0290004	1.5376	753.411	0.136448	DNA-binding transcriptional dual regulator SdiA
purD	0.588642	-0.764537	0.00361791	0.0290004	1.5376	43.4952	0.367927	phosphoribosylamine--glycine ligase
nepI	0.759425	-0.397021	0.00371461	0.0294812	1.53045	292.662	0.155065	purine ribonucleoside exporter
ortT	0.708835	-0.496479	0.00371864	0.0294812	1.53045	121.01	0.205834	orphan toxin OrtT
rpsK	0.858393	-0.22029	0.00378298	0.0299312	1.52388	7171.12	0.0789576	30S ribosomal subunit protein S11
aceK	0.781744	-0.355231	0.00389322	0.0306975	1.5129	511.561	0.136301	isocitrate dehydrogenase kinase/phosphatase
yeiP	0.782411	-0.354001	0.00390295	0.0307215	1.51256	317.427	0.135646	elongation factor P-like protein YeiP
rfaD	0.813091	-0.298512	0.00404542	0.0316799	1.49922	677.551	0.111557	ADP-L-glycero-D-mannoheptose 6-epimerase
rpoA	0.855036	-0.225943	0.00416271	0.0324875	1.48828	20057.1	0.0817177	RNA polymerase subunit &alpha;
mnmC	0.691403	-0.532402	0.00436436	0.0338884	1.46995	88.2308	0.231959	fused tRNA 5-aminomethyl-2-thiouridylate methyltransferase and tRNA 5-aminomethyl-2-thiouridylate synthase
rsmC	0.76464	-0.387147	0.00437271	0.0338959	1.46985	288.733	0.153879	16S rRNA m<sup>2</sup>G1207 methyltransferase
nhaA	0.787339	-0.344943	0.0043989	0.0340414	1.46799	388.268	0.13359	Na<sup>+</sup>:H<sup>+</sup> antiporter NhaA
rpsM	0.853742	-0.228128	0.0045204	0.0348641	1.45762	11237.4	0.0839597	30S ribosomal subunit protein S13
purK	0.657308	-0.605358	0.00462007	0.0355134	1.44961	75.1109	0.280734	5-(carboxyamino)imidazole ribonucleotide synthase
isrB	0.842438	-0.247358	0.00466909	0.0357704	1.44648	4280.34	0.091916
yedE	0.666233	-0.585902	0.00472903	0.0361692	1.44166	84.8849	0.270491	putative selenium transporter YedE
nusA	0.84164	-0.248725	0.00486146	0.0368139	1.43399	3410	0.0929447	transcription termination/antitermination protein NusA
mipA	0.832848	-0.263875	0.0048536	0.0368139	1.43399	1546.93	0.0992812	MltA-interacting protein
trxA	0.845424	-0.242253	0.00501927	0.0376914	1.42376	2009.35	0.090661	oxidized thioredoxin // thioredoxin 1
proQ	0.843026	-0.24635	0.00502662	0.0376914	1.42376	1877.97	0.092479	RNA chaperone ProQ
cspI	0.810526	-0.303069	0.00508608	0.0380751	1.41936	1793.76	0.117083	Qin prophage; cold shock-like protein CspI
yeeJ	0.762714	-0.390787	0.00516386	0.0385317	1.41418	251.778	0.159588	inverse autotransporter adhesin
yeeD	0.595116	-0.748758	0.00518024	0.0385911	1.41351	36.992	0.394758
ychF	0.830627	-0.267728	0.00522989	0.0388539	1.41056	1148.01	0.101902	redox-responsive ATPase YchF
cydX	0.726081	-0.461798	0.00523245	0.0388539	1.41056	130.253	0.198157	cytochrome <i>bd</i>-I accessory subunit CydX
gfcB	0.582306	-0.780151	0.00526974	0.0390676	1.40818	33.3204	0.419724	lipoprotein GfcB
yhbE	0.833854	-0.262133	0.00538709	0.0398089	1.40002	1324.22	0.099881	putative transporter YhbE
ygiL	0.552753	-0.855293	0.00548501	0.0404673	1.3929	24.3771	0.486704	putative fimbrial protein YgiL
glmZ	0.85182	-0.231379	0.00550045	0.0405161	1.39237	6229.67	0.0871942	small regulatory RNA GlmZ
folA	0.769258	-0.378461	0.00564484	0.0415131	1.38182	252.124	0.155315	dihydrofolate reductase
rpmG	0.853094	-0.229223	0.00566008	0.0415586	1.38134	16886.4	0.0866355	50S ribosomal subunit protein L33
ihfB	0.822162	-0.282505	0.00576391	0.0422533	1.37414	957.188	0.109689	integration host factor subunit &beta;
tomB	0.82282	-0.281351	0.00593805	0.0432535	1.36398	2752.83	0.109771	Hha toxicity modulator TomB
azuC	0.847295	-0.239064	0.00596229	0.0432926	1.36359	4055.27	0.0913377	small regulatory membrane protein AzuC
cfa	0.800407	-0.321194	0.00598535	0.043323	1.36328	420.527	0.12822	cyclopropane fatty acyl phospholipid synthase
trmD	0.852974	-0.229426	0.00613777	0.0441977	1.3546	4095	0.0877475	tRNA m<sup>1</sup>G37 methyltransferase
appY	0.537614	-0.895358	0.00614472	0.0441977	1.3546	20.4427	0.550722	DLP12 prophage; DNA-binding transcriptional activator AppY
yebQ	0.639962	-0.643942	0.00625523	0.0448519	1.34822	46.5606	0.32942	putative transporter YebQ
scpA	0.578706	-0.789096	0.00625377	0.0448519	1.34822	30.172	0.456728	methylmalonyl-CoA mutase
yjfZ	0.574186	-0.800411	0.00649602	0.0465058	1.33249	29.4035	0.47301	DUF2686 domain-containing protein YjfZ
slyX	0.756279	-0.40301	0.00654623	0.0467196	1.3305	282.895	0.173015	protein SlyX
yqeG	0.823037	-0.28097	0.00671453	0.0478462	1.32015	705.546	0.111461	putative transporter YqeG
ycjR	0.89295	-0.163349	0.00679073	0.0483142	1.31592	2.4614	0.371388	3-dehydro-D-guloside 4-epimerase
ppiC	0.816462	-0.292542	0.00689718	0.0489199	1.31051	606.716	0.117231	peptidyl-prolyl <i>cis-trans</i> isomerase C
mntP	0.61018	-0.712693	0.00694971	0.0490649	1.30923	38.8834	0.401528	Mn2+ exporter
yhhQ	0.789931	-0.340201	0.00697666	0.0491795	1.30822	297.251	0.140687	queuosine precursor transporter
rpsA	0.867003	-0.205892	0.00699747	0.0492506	1.30759	26310.5	0.0792249	30S ribosomal subunit protein S1
recN	0.794115	-0.332579	0.00715198	0.0501075	1.3001	679.203	0.137186	DNA repair protein RecN
yedD	0.760207	-0.395536	0.00714465	0.0501075	1.3001	173.311	0.170646	lipoprotein YedD
bsmA	1.54582	0.628373	0.00716935	0.0501527	1.29971	57.6957	0.331768	DUF1471 domain-containing putative lipoprotein BsmA
ppa	0.859478	-0.218467	0.00730174	0.051001	1.29242	4088.21	0.085013	inorganic pyrophosphatase
fdoG	1.16783	0.22383	0.00751323	0.0523985	1.28068	2609.69	0.0875435	formate dehydrogenase O subunit &alpha;
thiL	0.779154	-0.360019	0.00756573	0.0526846	1.27832	226.12	0.15284	thiamine monophosphate kinase
sbmA	1.39659	0.481911	0.00774755	0.0538536	1.26879	184.167	0.225593	peptide antibiotic/peptide nucleic acid transporter
zntA	0.814385	-0.296217	0.00775707	0.0538536	1.26879	493.236	0.121053	Zn<sup>2+</sup>/Cd<sup>2+</sup>/Pb<sup>2+</sup> exporting P-type ATPase
exbD	1.24778	0.319369	0.00781936	0.054204	1.26597	650.876	0.132376	Ton complex subunit ExbD
frdB	1.77853	0.830684	0.00785929	0.0543986	1.26441	19.362	0.546337	fumarate reductase iron-sulfur protein
tap	1.2343	0.303692	0.00792259	0.0547542	1.26158	283.769	0.562201	methyl-accepting chemotaxis protein Tap
rpsF	0.859237	-0.218872	0.00796163	0.0549412	1.2601	6835.94	0.0862323	30S ribosomal subunit protein S6
glyQ	0.816714	-0.292098	0.00798705	0.0550339	1.25937	922.8	0.11974	glycine&mdash;tRNA ligase subunit &alpha;
gadW	0.648191	-0.625509	0.00804392	0.0553427	1.25694	43.4849	0.337145	DNA-binding transcriptional dual regulator GadW
mlaA	0.798537	-0.324569	0.00808464	0.0555395	1.2554	461.805	0.136096	intermembrane phospholipid transport system - outer membrane lipoprotein MlaA
yjcZ	1.93274	0.950649	0.00813685	0.0556483	1.25455	359.618	3.04597
rpsR	0.851421	-0.232055	0.00813344	0.0556483	1.25455	2785.22	0.0922009	30S ribosomal subunit protein S18
secE	0.801765	-0.318748	0.00812213	0.0556483	1.25455	540.031	0.133105	Sec translocon subunit SecE
seqA	0.794062	-0.332676	0.0081637	0.0557175	1.25401	441.233	0.140417	negative modulator of initiation of replication
ves	1.30163	0.380314	0.00817126	0.0557175	1.25401	136.25	0.758441	HutD family protein Ves
yicC	0.834325	-0.261319	0.00830888	0.0565719	1.2474	709.099	0.105737	putative RNase adaptor protein YicC
hha	0.836121	-0.258216	0.00835995	0.0568353	1.24538	1213.02	0.104451	haemolysin expression-modulating protein Hha
rdgC	0.794888	-0.331176	0.00838451	0.0569179	1.24475	294.882	0.140024	nucleoid-associated protein RdgC
asnS	0.844994	-0.242987	0.00839747	0.0569217	1.24472	1408.81	0.0975187	asparagine&mdash;tRNA ligase
grxA	0.74424	-0.42616	0.00841422	0.0569511	1.2445	140.766	0.193826	oxidized glutaredoxin 1 // reduced glutaredoxin 1
mdfA	0.73011	-0.453815	0.00846481	0.0571251	1.24317	103.442	0.211842	multidrug efflux pump MdfA / Na<sup>+</sup>:H<sup>+</sup> antiporter / K<sup>+</sup>:H<sup>+</sup> antiporter
ucpA	1.2883	0.365474	0.00845847	0.0571251	1.24317	224.725	0.158807	oxidoreductase UcpA
bipA	0.857496	-0.221798	0.00847778	0.0571285	1.24315	3839.64	0.0882248	50S ribosomal subunit assembly factor BipA
hdeD	0.728674	-0.456655	0.00851532	0.0572974	1.24187	146.943	0.214348	acid-resistance membrane protein
hofM	1.85667	0.89272	0.0085634	0.0575365	1.24006	14.5719	0.667197	DNA utilization protein HofM
lysU	1.20891	0.273707	0.00869904	0.0583624	1.23387	581.307	0.11215	lysine&mdash;tRNA ligase/Ap<sub>4</sub>A synthetase/Ap<sub>3</sub>A synthetase
aroK	0.844838	-0.243254	0.00872082	0.0584231	1.23342	1361.51	0.0982163	shikimate kinase 1
hemB	0.805779	-0.311543	0.0087415	0.0584438	1.23326	437.981	0.130912	porphobilinogen synthase
opgB	0.822373	-0.282135	0.00874937	0.0584438	1.23326	530.043	0.116644	phosphoglycerol transferase II // phosphoglycerol transferase I
yadW	0.720963	-0.472003	0.00880288	0.0587157	1.23125	109.592	0.22558	protein YadW
ybiX	1.55216	0.63428	0.00883446	0.0588408	1.23032	42.0399	0.358435	PKHD-type hydroxylase YbiX
fecR	0.790414	-0.33932	0.00886389	0.0589513	1.22951	270.435	0.145763	ferric citrate regulator FecR
yadL	0.514814	-0.957876	0.00892216	0.0592529	1.22729	14.4104	0.813147	putative fimbrial protein YadL
miaA	0.844249	-0.244259	0.00897631	0.059456	1.2258	1081.05	0.0990404	tRNA dimethylallyltransferase
nlpD	1.19912	0.261979	0.00897864	0.059456	1.2258	701.541	0.107155	murein hydrolase activator NlpD
rbsK	0.782912	-0.353078	0.00899175	0.059457	1.2258	265.025	0.153699	ribokinase
carB	0.686037	-0.543641	0.00902646	0.0596006	1.22475	81.7322	0.280761	carbamoyl-phosphate synthetase large subunit
argX	0.84115	-0.249566	0.00907912	0.0597763	1.22347	119387	0.0982819	tRNA-Arg(CCG)
tsaD	0.752584	-0.410076	0.00906798	0.0597763	1.22347	234.549	0.187511	N<sup>6</sup>-L-threonylcarbamoyladenine synthase, TsaD subunit
rluB	0.848548	-0.236931	0.00911175	0.0599052	1.22254	1664.47	0.0959435	23S rRNA pseudouridine<sup>2605</sup> synthase
ttcA	0.829256	-0.270111	0.00918011	0.0602683	1.21991	600.095	0.111506	tRNA cytosine<sup>32</sup> 2-sulfurtransferase TtcA
waaU	0.814228	-0.296495	0.00922267	0.0604612	1.21852	540.29	0.124344	putative ADP-heptose:LPS heptosyltransferase 4
yiaD	0.738237	-0.437843	0.00924278	0.0605066	1.2182	117.18	0.204977	PF13488 family lipoprotein YiaD
metH	1.30071	0.379299	0.00945908	0.061784	1.20912	170.7	0.169858	cobalamin-dependent methionine synthase
ribE	0.824807	-0.277872	0.00946484	0.061784	1.20912	525.378	0.115996	6,7-dimethyl-8-ribityllumazine synthase
ygdD	0.673817	-0.569571	0.00953948	0.0621828	1.20633	54.5232	0.305741	DUF423 domain-containing inner membrane protein YgdD
epmC	1.26925	0.343974	0.00956102	0.0622347	1.20597	221.577	0.150059	EF-P-Lys34 hydroxylase
deoD	1.18593	0.246013	0.00961709	0.0625111	1.20404	825.04	0.100782	purine nucleoside phosphorylase
torS	1.56441	0.645622	0.00968262	0.062848	1.20171	39.7216	0.379505	sensor histidine kinase TorS
fnr	0.872181	-0.197301	0.0097141	0.0629633	1.20091	6203.5	0.0793514	DNA-binding transcriptional dual regulator FNR
G0-10706	0.761779	-0.392555	0.0097613	0.06318	1.19942	153.587	0.17872	small RNA
ptsG	0.835933	-0.258541	0.0098553	0.0636986	1.19587	1386.13	0.107172	EIIBC<sup>glc</sup> - phosphorylated // glucose-specific PTS enzyme IIBC component
talA	1.78804	0.838381	0.00988607	0.0638076	1.19513	18.2402	0.674084	transaldolase A
rpmE	0.855243	-0.225594	0.00997466	0.0642889	1.19186	5960.15	0.092148	50S ribosomal subunit protein L31
yfiR	0.825992	-0.275801	0.0100558	0.0646303	1.18956	660.644	0.115991	DUF4154 domain-containing protein YfiR
ygdB	0.412907	-1.27611	0.0100515	0.0646303	1.18956	6.4845	1.81745	DUF2509 domain-containing protein YgdB
yieP	1.21761	0.284055	0.0100787	0.064687	1.18918	610.751	0.119902	DNA-binding transcriptional dual regulator YieP
gspH	1.30464	0.383648	0.0101193	0.0648565	1.18805	5.2621	0.755868	type II secretion system protein GspH
mqo	1.24207	0.312745	0.0103932	0.0665194	1.17705	519.053	0.135202	malate:quinone oxidoreductase
paaJ	1.64066	0.714273	0.0104257	0.0666347	1.1763	29.8113	0.478848	&beta;-ketoadipyl-CoA thiolase
ydeE	1.4308	0.516818	0.0105015	0.0670258	1.17376	70.2847	0.26895	dipeptide exporter
rrsA	0.817631	-0.290478	0.0105702	0.0671955	1.17266	5413.91	0.124304	16S ribosomal RNA
yhiJ	0.669101	-0.579705	0.0105721	0.0671955	1.17266	50.2218	0.324327	DUF4049 domain-containing protein YhiJ
ynaA	0.540325	-0.8881	0.0105543	0.0671955	1.17266	14.308	0.750819	Rac prophage; putative prophage tail length tape measure domain-containing protein YnaA
cysB	1.24256	0.313319	0.0106096	0.067341	1.17172	344.241	0.136011	DNA-binding transcriptional dual regulator CysB
lysQ	1.18844	0.249072	0.0106517	0.0675147	1.1706	234672	0.103783	tRNA-Lys(UUU)
rob	1.19721	0.259679	0.0106847	0.0675376	1.17045	661.776	0.108996	DNA-binding transcriptional dual regulator Rob
yfdG	0.823921	-0.279421	0.0106727	0.0675376	1.17045	556.981	0.118918	CPS-53 (KpLE1) prophage; putative bactoprenol-linked glucose translocase
proL	1.15322	0.20567	0.01072	0.0675742	1.17022	285326	0.0867994	tRNA-Pro(GGG)
yncE	1.18006	0.238862	0.0107158	0.0675742	1.17022	1185.66	0.0992519	PQQ-like domain-containing protein YncE
tusE	0.778481	-0.361267	0.0109388	0.0688589	1.16204	226.435	0.163858	sulfur transfer protein TusE
ytfL	0.830426	-0.268077	0.0109581	0.0688857	1.16187	548.47	0.113682
rdlA	1.29754	0.375782	0.0110495	0.06936	1.15889	346.671	0.173119	putative antisense regulatory RNA RdlA
yqfA	1.25568	0.328465	0.0110638	0.06936	1.15889	243.025	0.145363
rapZ	1.22661	0.294681	0.0111379	0.0696349	1.15717	344.888	0.127325	RNase adaptor protein RapZ
uhpA	1.38573	0.470646	0.0111234	0.0696349	1.15717	96.9798	0.237072	UhpA-Phosphorylated // DNA-binding transcriptional activator UhpA
argR	0.81102	-0.30219	0.0111649	0.0697082	1.15672	323.501	0.131363	DNA-binding transcriptional dual regulator ArgR
npr	1.2551	0.3278	0.0111952	0.0698024	1.15613	252.642	0.145135	Npr-<i>N</i>-phospho-L-histidine // phosphorelay protein NPr
trpD	1.4284	0.514399	0.011282	0.0702484	1.15336	68.8342	0.273807	anthranilate synthase subunit TrpD
dapF	1.29284	0.370539	0.0113645	0.0706428	1.15093	189.934	0.170722	diaminopimelate epimerase
hscA	0.821795	-0.28315	0.0113761	0.0706428	1.15093	586.561	0.121963	iron-sulfur cluster biosynthesis chaperone HscA
mntH	1.28641	0.363353	0.0113937	0.0706563	1.15085	237.907	0.165947	Mn<sup>2+</sup>/Fe<sup>2+</sup>: H<sup>+</sup> symporter MntH
yiiX	0.765674	-0.385198	0.0114122	0.0706758	1.15073	175.353	0.179535	putative lipid-binding hydrolase YiiX
cspD	1.60571	0.683209	0.0114687	0.0707392	1.15034	28.5626	0.45405	DNA replication inhibitor CspD
ppsR	1.59925	0.677393	0.0114385	0.0707392	1.15034	26.2869	0.446241	phosphoenolpyruvate synthetase regulatory protein
yejA	1.28668	0.363658	0.0114556	0.0707392	1.15034	185.86	0.166529	putative oligopeptide ABC transporter periplasmic binding protein YejA
rrlA	0.813775	-0.297298	0.0116074	0.0714983	1.1457	6285.3	0.129491	23S ribosomal RNA
yecJ	0.843266	-0.24594	0.0116257	0.0715152	1.1456	807.697	0.10383	DUF2766 domain-containing protein YecJ
fur	0.869979	-0.200947	0.0118077	0.0725373	1.13944	3347.69	0.0832347	DNA-binding transcriptional dual regulator Fur
waaP	0.807925	-0.307707	0.0118323	0.0725913	1.13912	298.847	0.135803	lipopolysaccharide core heptose (I) kinase
yjcE	1.36433	0.448192	0.0118641	0.0726895	1.13853	97.416	0.223845	putative transporter YjcE
holD	0.826933	-0.274158	0.0119008	0.0728172	1.13777	490.105	0.118273	DNA polymerase III subunit &psi;
ybjL	0.814544	-0.295936	0.011994	0.0732893	1.13496	341.259	0.12966	putative transport protein YbjL
gltX	0.843147	-0.246144	0.0120455	0.0735061	1.13368	1199.39	0.104553	glutamate&mdash;tRNA ligase
omrA	0.766627	-0.383402	0.0121132	0.0738213	1.13182	257.492	0.180903	small regulatory RNA OmrA
arcA	0.85708	-0.222497	0.0122422	0.074431	1.12825	2838.38	0.0935406	DNA-binding transcriptional dual regulator ArcA-phosphorylated // DNA-binding transcriptional dual regulator ArcA
shiA	1.25909	0.332381	0.0122457	0.074431	1.12825	236.751	0.150153	shikimate:H+ symporter
gltJ	1.48929	0.574623	0.0123237	0.0748063	1.12606	47.0068	0.338331	glutamate/aspartate ABC transporter membrane subunit GltJ
ppc	1.20341	0.267129	0.012497	0.0757581	1.12057	590.316	0.115577	phosphoenolpyruvate carboxylase
fabI	0.863294	-0.212076	0.0125549	0.0759084	1.11971	1890.52	0.089087	enoyl-[acyl-carrier-protein] reductase
yihY	1.30788	0.387227	0.012542	0.0759084	1.11971	137.034	0.184433	PF03631 family membrane protein YihY
rcsC	1.20846	0.273174	0.0127215	0.0768146	1.11456	507.688	0.119038	RcsC-phospho-L-aspartate // RcsC-<i>N</i>-phospho-L-histidine // histidine kinase RcsC
ylcH	0.566232	-0.820536	0.0127402	0.0768262	1.11449	13.5096	0.761631	DLP12 prophage; uncharacterized protein YlcH
ycgZ	0.687904	-0.539721	0.0128623	0.077394	1.11129	58.0945	0.307726	putative two-component system connector protein YcgZ
yieE	1.20668	0.271041	0.0128681	0.077394	1.11129	652.472	0.118135	putative phosphopantetheinyl transferase
fepG	1.40047	0.48591	0.012924	0.0776287	1.10998	74.398	0.258818	ferric enterobactin ABC transporter membrane subunit FepG
rrlC	0.822171	-0.28249	0.0129481	0.0776719	1.10974	6489.76	0.124371	23S ribosomal RNA
iscU	0.79614	-0.328906	0.0132737	0.0795208	1.09952	354.371	0.150652	scaffold protein for iron-sulfur cluster assembly
hisI	1.51415	0.598506	0.0135983	0.0813595	1.08959	34.8947	0.377314	putative bifunctional phosphoribosyl-AMP cyclohydrolase/phosphoribosyl-ATP pyrophosphatase
mrdA	0.847669	-0.238427	0.0137571	0.0822025	1.08512	834.438	0.10306	peptidoglycan DD-transpeptidase MrdA
mpaA	1.42529	0.511257	0.0138163	0.0824484	1.08382	60.9441	0.286904	murein tripeptide amidase A
ampG-int	1.21009	0.275111	0.0138408	0.0824855	1.08362	500.153	0.121823
cirA	1.2209	0.287948	0.0138584	0.0824855	1.08362	640.92	0.128577	iron-catecholate outer membrane transporter CirA
fabA	0.85556	-0.225059	0.0139735	0.0830627	1.08059	1941	0.0967125	&beta;-hydroxyacyl-acyl carrier protein dehydratase/isomerase
ansP	0.764518	-0.387378	0.0141516	0.0840123	1.07566	135.495	0.189476	L-asparagine transporter
trg	1.28115	0.357434	0.0142884	0.0847151	1.07204	219.388	0.170024	methyl-accepting chemotaxis protein Trg
emrB	0.753123	-0.409043	0.01432	0.0847927	1.07164	110.713	0.20509	multidrug efflux pump membrane subunit EmrB
kdpA	1.68333	0.75132	0.0146878	0.0868584	1.06119	14.2161	0.975855	K<sup>+</sup> transporting P-type ATPase subunit KdpA
mmuM	1.58912	0.668232	0.0150435	0.0888475	1.05135	24.5201	0.507014	CP4-6 prophage; homocysteine <i>S</i>-methyltransferase
pgaA	1.40405	0.489598	0.0151099	0.0891252	1.05	72.1262	0.273426	partially deacetylated poly-&beta;-1,6-<i>N</i>-acetyl-D-glucosamine export outer membrane porin
aceF	1.14968	0.201232	0.0151629	0.0893228	1.04904	5599	0.086501	AceF-dihydrolipoate // AceF-S-acetyldihydrolipoate // AceF-lipoate // pyruvate dehydrogenase, E2 subunit
rsxG	0.772682	-0.372052	0.015353	0.0903268	1.04418	146.154	0.182478	SoxR [2Fe-2S] reducing system protein RsxG
infA	0.870809	-0.199572	0.015597	0.0916447	1.03789	4564.8	0.0866004	translation initiation factor IF-1
rplT	0.880194	-0.184107	0.0158018	0.0926269	1.03326	32018.9	0.0791513	50S ribosomal subunit protein L20
yjiR	1.40374	0.489272	0.0158045	0.0926269	1.03326	63.0459	0.277592	fused putative DNA-binding transcriptional regulator/putative aminotransferase YjiR
hmp	0.665849	-0.586733	0.0158633	0.0928531	1.0322	35.3646	0.387712	nitric oxide dioxygenase
nrdD	1.49322	0.578422	0.015884	0.0928558	1.03219	42.1678	0.384088	anaerobic ribonucleoside-triphosphate reductase
serA	1.23857	0.308678	0.0160273	0.0935325	1.02904	274.603	0.143948	phosphoglycerate dehydrogenase
zipA	1.1794	0.238056	0.0160406	0.0935325	1.02904	784.686	0.105433	cell division protein ZipA
ahpF	0.832523	-0.264439	0.0160997	0.0937581	1.02799	526.328	0.119469	alkyl hydroperoxide reductase, AhpF component
ydcK	1.62717	0.702363	0.0161956	0.0941974	1.02596	15.4129	0.657306	putative acyltransferase YdcK
chaC	1.42733	0.513317	0.0162678	0.0942587	1.02568	64.7705	0.302857	glutathione-specific &gamma;-glutamylcyclotransferase
slyD	0.873513	-0.195098	0.0162625	0.0942587	1.02568	4145.15	0.0852241	FKBP-type peptidyl-prolyl <i>cis-trans</i> isomerase SlyD
yrbG	0.814559	-0.295909	0.0162455	0.0942587	1.02568	284.408	0.136962	putative transport protein YrbG
yeaL	1.55694	0.638716	0.0165166	0.0955797	1.01963	22.8681	0.491389	DUF441 domain-containing inner membrane protein YeaL
tar	1.23885	0.309	0.0165611	0.0955959	1.01956	723.981	0.548952	methyl-accepting chemotaxis protein Tar
pgaC	1.56248	0.643842	0.0165592	0.0955959	1.01956	26.3558	0.496904	poly-<i>N</i>-acetyl-D-glucosamine synthase subunit PgaC
yihG	0.823349	-0.280424	0.0167198	0.0963906	1.01597	363.534	0.12912	1-acylglycerol-3-phosphate <i>O</i>-acyltransferase YihG
evgS	1.16299	0.217836	0.0168644	0.0969808	1.01331	1349.79	0.096167	EvgS-<i>N</i>-phospho-L-histidine-721 // EvgS-phospho-L-aspartate // EvgS-<i>N</i>-phospho-L-histidine-1137 // sensor histidine kinase EvgS
yhjX	1.47199	0.557763	0.016851	0.0969808	1.01331	36.8991	0.361128	putative transporter YhjX
bamC	1.20481	0.268803	0.01692	0.0971106	1.01273	484.219	0.122685	outer membrane protein assembly factor BamC
yibF	1.2967	0.374842	0.0169293	0.0971106	1.01273	132.458	0.18843	glutathione transferase-like protein YibF
pdeH	1.29702	0.3752	0.0171922	0.0984957	1.00658	572.317	0.674885	c-di-GMP phosphodiesterase PdeH
gltT	0.836615	-0.257364	0.0172975	0.0989751	1.00447	1.01503e+06	0.116951	tRNA-Glu(UUC)
thiI	0.84595	-0.241356	0.0174745	0.0998638	1.00059	986.991	0.108969	tRNA uridine 4-sulfurtransferase
sdaB	1.21385	0.27959	0.0175948	0.100426	0.998154	607.747	0.129816	L-serine deaminase II
sspA	0.867955	-0.204308	0.017747	0.101043	0.995492	1390.47	0.0904663	stringent starvation protein A
ygaZ	0.832997	-0.263616	0.0177347	0.101043	0.995492	1662.31	0.121468	L-valine exporter, YgaZ component
glnZ	0.839166	-0.252972	0.0178156	0.101308	0.994355	557.363	0.115437
yggX	1.23512	0.304648	0.0178415	0.10133	0.994261	261.275	0.144812	putative Fe<sup>2+</sup>-trafficking protein
rraA	1.18775	0.248236	0.0180072	0.102145	0.990784	737.39	0.112985	ribonuclease E inhibitor protein A
asr	1.20248	0.266015	0.0180373	0.102189	0.990596	4.54639	0.478469	periplasmic chaperone Asr
clpB	1.13757	0.18595	0.0182176	0.103083	0.986812	5188.43	0.081881	ClpB80 // protein disaggregase ClpB
yaiE	1.21081	0.275973	0.018258	0.103184	0.986386	537.635	0.128541
ybjG	0.783118	-0.352698	0.0182808	0.103186	0.986378	161.859	0.176414	undecaprenyl pyrophosphate phosphatase
essQ	0.730805	-0.452442	0.0184521	0.104025	0.98286	74.66	0.256338	Qin prophage; putative prophage lysis protein EssQ
lysZ	1.17758	0.235827	0.0188396	0.10608	0.974367	229999	0.105528	tRNA-Lys(UUU)
ydcY	0.847056	-0.23947	0.0189219	0.106412	0.973007	770.182	0.109562	DUF2526 domain-containing protein YdcY
ybgL	1.37251	0.456814	0.0190895	0.107224	0.969709	63.1182	0.263533
yaiW	1.32049	0.401074	0.0191174	0.107249	0.969605	174.705	0.213494	surface-exposed outer membrane lipoprotein
yhdJ	0.724133	-0.465673	0.0193313	0.108317	0.965305	64.773	0.27386	DNA adenine methyltransferase
sgcB	1.10495	0.14398	0.0193862	0.108492	0.964603	2.37818	0.354918	putative PTS enzyme IIB component SgcB
cof	1.32998	0.411402	0.0195389	0.10908	0.962254	118.489	0.223422	HMP-PP phosphatase
prlC	0.776511	-0.364922	0.0195335	0.10908	0.962254	163.251	0.188238	oligopeptidase A
xseA	0.858114	-0.220759	0.0197608	0.110185	0.957877	1237.15	0.10108	exodeoxyribonuclease VII subunit XseA
secM	0.870237	-0.20052	0.0199587	0.111019	0.954604	1391.94	0.0904635	SecA translation regulator
yheV	1.50674	0.591434	0.0199415	0.111019	0.954604	29.7727	0.467953	DUF2387 domain-containing protein YheV
rutA	1.07167	0.0998671	0.0202336	0.112276	0.949713	1.69509	0.331434	pyrimidine monooxygenase RutA
ugpE	1.07167	0.0998671	0.0202336	0.112276	0.949713	1.69509	0.331434	<i>sn</i>-glycerol 3-phosphate ABC transporter membrane subunit UgpE
hns	0.872412	-0.196918	0.0204055	0.112864	0.947446	7946.43	0.0890499	DNA-binding transcriptional dual regulator H-NS
lpxC	0.886006	-0.174612	0.0204301	0.112864	0.947446	7180.5	0.0780798	UDP-3-O-acyl-N-acetylglucosamine deacetylase
mglB	1.55064	0.632864	0.0204379	0.112864	0.947446	22.1559	0.634001	D-galactose/methyl-galactoside ABC transporter periplasmic binding protein
yeaO	1.41836	0.504223	0.0204226	0.112864	0.947446	43.8455	0.323513	DUF488 domain-containing protein YeaO
speB	0.779275	-0.359795	0.0204827	0.112975	0.947018	153.795	0.186487	agmatinase
dinF	0.822887	-0.281234	0.0206722	0.11334	0.945618	346.203	0.134828	DNA damage-inducible protein F
hscB	0.796352	-0.328522	0.0206588	0.11334	0.945618	190.049	0.164751	[Fe-S] cluster biosynthesis co-chaperone HscB
maeA	1.20931	0.274183	0.0206724	0.11334	0.945618	333.043	0.13066	malate dehydrogenase (oxaloacetate-decarboxylating)
mscS	0.834942	-0.260252	0.0206344	0.11334	0.945618	404.628	0.122786	small conductance mechanosensitive channel MscS
yfbS	1.32857	0.409877	0.0206548	0.11334	0.945618	99.9511	0.226715	putative transporter YfbS
frr	0.862599	-0.213238	0.0207371	0.113559	0.944777	1210.53	0.0975266	ribosome-recycling factor
yhhI	0.690075	-0.535175	0.0208049	0.113795	0.943877	38.6243	0.368225	putative transposase
dsbB	0.831171	-0.266782	0.0209648	0.114396	0.941588	462.604	0.126942	protein thiol:quinone oxidoreductase DsbB<sub>oxidized</sub> // protein thiol:quinone oxidoreductase DsbB
puuR	1.49342	0.578622	0.0209461	0.114396	0.941588	25.2574	0.451336	DNA-binding transcriptional repressor PuuR
yagL	0.696296	-0.522227	0.021124	0.115128	0.938819	40.2278	0.351049	CP4-6 prophage; resolvase-like catalytic domain-containing protein YagL
metA	0.76866	-0.379583	0.0212274	0.115555	0.937213	131.985	0.203497	homoserine <i>O</i>-succinyltransferase
rrlE	0.835788	-0.258791	0.0212599	0.115595	0.937062	5934.72	0.122725	23S ribosomal RNA
rrlB	0.836104	-0.258245	0.0214086	0.116265	0.934551	6396.97	0.122052	23S ribosomal RNA
spoT	0.876719	-0.189814	0.0216001	0.117166	0.931197	2429.87	0.0862763	bifunctional (p)ppGpp synthase/hydrolase SpoT
mutL	0.85754	-0.221724	0.0216382	0.117235	0.930944	946.261	0.102777	DNA mismatch repair protein MutL
mltA	0.803104	-0.316341	0.021803	0.117988	0.928162	200.945	0.158685	membrane-bound lytic murein transglycosylase A
moaD	1.47864	0.564272	0.0219405	0.118452	0.926457	25.0291	0.440104	MoaD-S // molybdopterin synthase sulfur carrier subunit
ybcK	0.702841	-0.508729	0.0219662	0.118452	0.926457	47.6044	0.340837	DLP12 prophage; putative recombinase YbcK
yieH	0.796305	-0.328607	0.0219363	0.118452	0.926457	175.524	0.167106	6-phosphogluconate phosphatase
glxK	0.85564	-0.224924	0.0220121	0.118561	0.926059	3.95299	0.427682	glycerate 2-kinase 2
entS	1.25805	0.33119	0.0220754	0.118762	0.925322	189.237	0.16899	enterobactin exporter EntS
ispD	0.811072	-0.302099	0.0222193	0.119396	0.923009	238.503	0.150148	2-<i>C</i>-methyl-D-erythritol 4-phosphate cytidylyltransferase
ivy	1.35815	0.441638	0.0225721	0.121009	0.917183	73.4334	0.262701	periplasmic chaperone, inhibitor of vertebrate C-type lysozyme
sdaA	1.22452	0.292213	0.0225601	0.121009	0.917183	246.28	0.144055	L-serine deaminase I
lysY	1.16605	0.221626	0.0226974	0.121538	0.915288	195493	0.10187	tRNA-Lys(UUU)
rbsR	0.762867	-0.390496	0.0228016	0.121886	0.914045	145.157	0.217133	DNA-binding transcriptional dual regulator RbsR
rrlH	0.832113	-0.265149	0.0228155	0.121886	0.914045	5961.49	0.128398	23S ribosomal RNA
waaS	0.834343	-0.261288	0.0235626	0.125731	0.900558	415.326	0.126686	lipopolysaccharide core biosynthesis protein WaaS
lysV	1.19205	0.253441	0.0236821	0.126222	0.898864	277767	0.108443	tRNA-Lys(UUU)
carA	0.702479	-0.509474	0.0238068	0.126739	0.897088	49.8771	0.360612	carbamoyl-phosphate synthetase small subunit
zapC	1.22563	0.293521	0.0238975	0.127075	0.895939	262.345	0.14682	cell division protein ZapC
ydiE	1.20753	0.272061	0.0239672	0.127298	0.895178	323.278	0.133494	PF10636 family protein YdiE
rarA	1.20092	0.264139	0.0241226	0.127863	0.893255	393.606	0.128817	replication-associated recombination protein A
ydhC	1.39117	0.476302	0.0241293	0.127863	0.893255	49.3998	0.309735
yjeM	0.738776	-0.436791	0.0248423	0.131489	0.88111	84.5509	0.268825	putative transporter YjeM
degS	0.833749	-0.262315	0.0250447	0.132408	0.878087	392.038	0.129015	serine endoprotease
yhjC	0.698166	-0.518359	0.0250913	0.132502	0.877778	42.5348	0.386602
cyoB	1.17767	0.235936	0.0251822	0.132829	0.876707	2257.5	0.113588	cytochrome <i>bo</i><sub>3</sub> subunit 1
aspC	1.18963	0.250511	0.0252794	0.133188	0.875533	593.274	0.122032	aspartate aminotransferase
yfiF	0.841213	-0.249457	0.0254858	0.134122	0.8725	549.041	0.121086	putative methyltransferase YfiF
htgA	0.744306	-0.426032	0.0256299	0.134726	0.870549	10.172	0.700475
recO	0.849512	-0.235294	0.0257217	0.135053	0.869494	624.272	0.113893	recombination mediator protein RecO
yhjG	1.22438	0.292054	0.0258882	0.135772	0.867189	233.19	0.50486	AsmA family protein YhjG
tamA	1.23389	0.303215	0.0259316	0.135845	0.866956	212.077	0.155929	translocation and assembly module subunit TamA
fpr	1.29388	0.371705	0.0263031	0.137321	0.862264	110.04	0.208406	flavodoxin/ferredoxin-NADP<sup>+</sup> reductase
pntA	1.25547	0.328223	0.0262983	0.137321	0.862264	171.738	0.174633	pyridine nucleotide transhydrogenase subunit &alpha;
sokB	1.14975	0.201323	0.0262523	0.137321	0.862264	2656.29	0.0955171	putative small regulatory RNA antitoxin SokB
ybbA	1.44885	0.534908	0.0265774	0.138595	0.858252	28.4484	0.443943	putative ABC transporter ATP-binding protein YbbA
cybB	1.23297	0.302137	0.0266822	0.138853	0.857443	229.308	0.156304	superoxide oxidase
moaE	1.38187	0.466618	0.026748	0.138853	0.857443	43.5244	0.313178	molybdopterin synthase catalytic subunit
prlF	1.39082	0.475931	0.0266974	0.138853	0.857443	52.0921	0.323565	antitoxin PrlF
yecA	0.811453	-0.301421	0.0267253	0.138853	0.857443	215.257	0.156105	uncharacterized iron-binding protein YecA
pheS	1.18175	0.240924	0.0268093	0.139014	0.85694	533.588	0.117975	phenylalanine&mdash;tRNA ligase subunit &alpha;
wbbJ	1.16476	0.220035	0.0271125	0.140428	0.852546	909.057	0.106303	putative lipopolysaccharide biosynthesis O-acetyl transferase WbbJ
insA-7	0.820295	-0.285786	0.027383	0.141669	0.848725	285.225	0.146769
yeiW	0.826811	-0.27437	0.027554	0.142393	0.84651	514.275	0.13945	putative metal-chelating domain-containing protein YeiW
ftsN	0.827907	-0.27246	0.0277002	0.142827	0.845189	507.239	0.13846	cell division protein FtsN
yidZ	0.781904	-0.354937	0.0276991	0.142827	0.845189	139.305	0.19814	DNA-binding transcriptional dual regulator YidZ
hicA	1.42726	0.51325	0.0277331	0.142836	0.845162	35.6187	0.400554	mRNA interferase toxin HicA
ansB	0.754099	-0.407174	0.0279227	0.143346	0.843615	83.4065	0.246527	L-asparaginase 2
rpoD	0.869924	-0.201038	0.0278724	0.143346	0.843615	1496.91	0.0966264	RNA polymerase sigma factor RpoD
tbpA	0.754209	-0.406964	0.0279257	0.143346	0.843615	77.2852	0.246575
yhfL	0.685621	-0.544516	0.0280831	0.143993	0.84166	16.2474	0.607048	DUF4223 domain-containing lipoprotein YhfL
pspG	0.704162	-0.50602	0.028317	0.144925	0.838858	47.2688	0.41019	phage shock protein G
ygbK	1.4493	0.535354	0.028328	0.144925	0.838858	24.6201	0.618435	putative 3-oxo-tetronate kinase YgbK
dgcP	1.19494	0.256941	0.0283864	0.145062	0.838447	387.055	0.129052	diguanylate cyclase DgcP
chiX	1.13347	0.180743	0.028491	0.145272	0.837817	6793.95	0.0860526	small regulatory RNA ChiX
hemL	0.806663	-0.309963	0.0284904	0.145272	0.837817	258.834	0.165256	glutamate-1-semialdehyde 2,1-aminomutase
gsiC	1.45374	0.539768	0.0285822	0.145576	0.836912	18.8172	0.549057	glutathione ABC transporter membrane subunit GsiC
rirA	0.805197	-0.312586	0.0287907	0.146475	0.834237	191.222	0.16712	small regulatory RNA RirA
topA	0.886768	-0.173371	0.0289445	0.147094	0.832404	2805.01	0.0827745	DNA topoisomerase 1
ghxP	0.740239	-0.433937	0.0291103	0.147123	0.832321	62.3603	0.283214	guanine/hypoxanthine transporter GhxP
rcsD	1.15794	0.211554	0.0290673	0.147123	0.832321	1353.81	0.103114	RcsD-<i>N</i>-phospho-L-histidine // RcsD phosphotransferase
serC	1.17548	0.233254	0.0290776	0.147123	0.832321	550.928	0.115591	phosphoserine/phosphohydroxythreonine aminotransferase
ybgP	0.692388	-0.530347	0.0290486	0.147123	0.832321	19.3859	0.581406	putative fimbrial chaperone YbgP
yjhR	0.760299	-0.395361	0.0291023	0.147123	0.832321	89	0.238144	KpLE2 phage-like element; PLD-like domain-containing protein YjhR
fecD	1.23987	0.310187	0.0292322	0.147576	0.830985	186.622	0.16558	ferric citrate ABC transporter membrane subunit FecD
yqjI	1.28917	0.366438	0.0292864	0.147687	0.830658	94.852	0.211003
yqgB	0.790165	-0.339774	0.0294391	0.148294	0.828876	141.617	0.189137	acid stress response protein YqgB
intF	0.79859	-0.324474	0.0295676	0.148778	0.827461	208.881	0.177516	CP4-6 prophage; putative phage integrase
ynbB	0.927268	-0.108942	0.0296526	0.149043	0.826689	1.68879	0.334712	putative CDP-diglyceride synthase
nupG	1.29162	0.369185	0.0300045	0.150646	0.822042	121.22	0.216047	nucleoside:H<sup>+</sup> symporter NupG
mraZ	0.856815	-0.222945	0.0303348	0.152138	0.817762	616.236	0.110745	DNA-binding transcriptional repressor MraZ
yeeO	1.39899	0.48439	0.0307402	0.154003	0.812471	42.1816	0.38086	FMN/FAD exporter
mdtO	0.73571	-0.44279	0.0307852	0.15406	0.81231	10.5633	0.668019	putative multidrug efflux pump subunit MdtO
lysC	1.33007	0.411503	0.0310667	0.1553	0.80883	64.4147	0.26178	aspartate kinase III
napF	1.41331	0.499074	0.031365	0.15662	0.805152	14.9978	0.620273	ferredoxin-type protein
dsbA	0.86851	-0.203386	0.0315606	0.157426	0.802924	858.454	0.100512	thiol:disulfide oxidoreductase - DsbA<sub>oxidized</sub> // thiol:disulfide oxidoreductase DsbA
ygeP	0.729274	-0.455468	0.0316618	0.157759	0.802006	47.0867	0.332246	protein YgeP
ycbX	1.24005	0.310398	0.0317194	0.157875	0.801688	160.126	0.169523	6-<i>N</i>-hydroxylaminopurine resistance protein
insB-1	0.764699	-0.387036	0.0318013	0.15811	0.801039	74.5713	0.23714
yadC	0.732535	-0.44903	0.0319823	0.158838	0.799045	52.6799	0.317279	fimbrial tip-adhesin YadC
ynjE	1.41261	0.498359	0.0321368	0.159433	0.797422	17.5775	0.595704	molybdopterin synthase sulfurtransferase
fes	1.33691	0.418904	0.0322928	0.160034	0.795788	64.3251	0.275837	ferric enterobactin esterase
ydhT	1.36175	0.445463	0.0323945	0.160365	0.79489	12.1913	0.632896	uncharacterized protein YdhT
metC	1.31778	0.398113	0.032604	0.161228	0.792559	82.6379	0.251189	cystathionine &beta;-lyase / L-cysteine desulfhydrase / alanine racemase
msrA	1.37931	0.463948	0.0328032	0.162039	0.790381	37.8359	0.347153	methionine sulfoxide reductase A
elaA	1.36306	0.446848	0.032937	0.162524	0.789081	48.515	0.317769	putative acetyltransferase ElaA
ghrB	0.807949	-0.307663	0.0329847	0.162585	0.788918	326.979	0.169557	glyoxylate reductase
yehP	0.929896	-0.104859	0.0330439	0.162702	0.788606	1.6439	0.332717	VWA domain-containing protein YehP
trpT	0.855766	-0.224712	0.0332032	0.163311	0.786984	326927	0.112438	tRNA-Trp(CCA)
ychN	1.25416	0.326719	0.0333278	0.163749	0.785822	160.551	0.185017	DsrE/F sulfur relay family protein YchN
arcB	1.17333	0.230604	0.0338344	0.16606	0.779735	490.443	0.117866	ArcB-<i>N</i>-phospho-L-histidine-292 // ArcB-phospho-L-aspartate-576 // ArcB-<i>N</i>-phospho-L-histidine-717 // sensor histidine kinase ArcB
ileT	1.16158	0.216094	0.0343198	0.168262	0.774013	352388	0.109653	tRNA-Ile(GAU)
yjeJ	0.721955	-0.470018	0.0344291	0.168618	0.773095	35.1188	0.381935	protein YjeJ
ftsY	0.869911	-0.20106	0.0346695	0.169615	0.770537	885.656	0.101186	signal recognition particle receptor
ybhA	0.749285	-0.416413	0.0348196	0.170168	0.769123	70.8328	0.280667	pyridoxal phosphate/fructose-1,6-bisphosphate phosphatase
yidC	0.874363	-0.193696	0.035061	0.171165	0.766585	2476.17	0.0971779	membrane protein insertase YidC
yebG	0.86962	-0.201544	0.0352534	0.171921	0.76467	970.297	0.101767	DNA damage-inducible protein YebG
srlR	0.741528	-0.431427	0.0353431	0.172176	0.764028	54.0225	0.306197	DNA-binding transcriptional repressor SrlR
nrdA	0.8504	-0.233786	0.0355912	0.173201	0.76145	1276.99	0.121494	ribonucleoside-diphosphate reductase 1 subunit &alpha;
ispG	1.164	0.219092	0.035678	0.173439	0.760853	796.367	0.112213	(<em>E</em>)-4-hydroxy-3-methylbut-2-enyl-diphosphate synthase (flavodoxin)
nfsA	0.783263	-0.352431	0.0359379	0.174517	0.758161	102.206	0.212115	NADPH-dependent nitro/quinone reductase NfsA
yjjZ	1.24207	0.312743	0.0362449	0.175822	0.754927	162.149	0.177528	DUF1435 domain-containing protein YjjZ
ydiU	1.19534	0.257423	0.0364506	0.176447	0.753385	427.81	0.137134
yihF	0.770616	-0.375916	0.0364366	0.176447	0.753385	102.836	0.23724	DUF945 domain-containing protein YihF
focA	1.20988	0.274858	0.0369107	0.178486	0.748396	332.085	0.14971	formate channel FocA
rimM	0.88402	-0.177849	0.0370113	0.178784	0.747671	4623.82	0.0893896	ribosome maturation factor RimM
feoA	1.37853	0.46313	0.0372252	0.179628	0.745626	48.5289	0.386723	ferrous iron transport protein A
iraP	1.3576	0.441062	0.0373076	0.179648	0.745578	12.78	0.590614	anti-adaptor protein IraP
rlpA	0.858662	-0.219838	0.0372922	0.179648	0.745578	512.316	0.114163	rare lipoprotein RlpA
ycgR	1.18087	0.239852	0.0374256	0.179862	0.745061	106.848	0.432206	flagellar brake protein YcgR
yidB	0.736395	-0.441449	0.0374304	0.179862	0.745061	41.9703	0.337687	DUF937 domain-containing protein YidB
yqiH	0.748682	-0.417575	0.0375088	0.18005	0.744606	14.2407	0.584579	putative fimbrial chaperone YqiH
ytfK	1.18183	0.241017	0.0376343	0.180464	0.74361	517.495	0.127456	stringent response modulator YtfK
tktB	1.38127	0.465992	0.0376824	0.180506	0.743508	16.0286	0.54335	transketolase 2
hemC	1.16266	0.217429	0.0379205	0.181457	0.741227	696.437	0.112986	hydroxymethylbilane synthase
hisA	1.34937	0.432288	0.0383718	0.183425	0.736541	14.2595	0.573855	1-(5-phosphoribosyl)-5-[(5-phosphoribosylamino)methylideneamino]imidazole-4-carboxamide isomerase
yiaF	0.85792	-0.221085	0.0384681	0.183694	0.735905	801.303	0.115805	DUF3053 domain-containing protein YiaF
sgcR	0.740684	-0.43307	0.0385701	0.18399	0.735206	45.9293	0.326255	KpLE2 phage-like element; putative DNA-binding transcriptional regulator SgcR
gcvA	0.833751	-0.262312	0.0386827	0.184144	0.734842	321.893	0.142871	DNA-binding transcriptional dual regulator GcvA
yajQ	0.852439	-0.230331	0.0386454	0.184144	0.734842	512.919	0.121583	nucleotide binding protein YajQ
araE	0.759707	-0.396485	0.039271	0.186751	0.728738	63.8655	0.270334	arabinose:H<sup>+</sup> symporter
tcyP	0.844364	-0.244063	0.0393813	0.187082	0.727969	287.61	0.434246	cystine/sulfocysteine:cation symporter
dgkA	0.780271	-0.357953	0.0400683	0.189952	0.721356	83.4477	0.22655	diacylglycerol kinase
lpoB	1.31438	0.394385	0.0400398	0.189952	0.721356	63.7795	0.270981	outer membrane lipoprotein - activator of MrcB activity
ymgF	0.729313	-0.455391	0.0402352	0.190546	0.72	28.3241	0.408418	inner membrane protein YmgF
valT	1.13133	0.178022	0.0403205	0.190753	0.719528	1.2426e+06	0.0910198	tRNA-Val(UAC)
yfcT	0.934341	-0.0979787	0.0406933	0.192319	0.715978	1.55509	0.329483
coaD	0.785027	-0.349185	0.0408624	0.192919	0.714625	105.477	0.219297	pantetheine-phosphate adenylyltransferase
gltL	1.28984	0.367193	0.0410781	0.193738	0.712785	86.4499	0.23854	glutamate/aspartate ABC transporter ATP binding subunit
yhdU	0.73379	-0.446561	0.0411366	0.193815	0.712613	15.2397	0.534092	DUF2556 domain-containing protein YhdU
emrE	0.802723	-0.317026	0.0414346	0.195019	0.709923	144.653	0.189067	DLP12 prophage; multidrug/betaine/choline efflux transporter EmrE
hyfE	0.934606	-0.0975691	0.0416503	0.195833	0.708114	1.53511	0.329279	hydrogenase 4 component E
infC	0.896586	-0.157486	0.0420953	0.197521	0.704387	17728.5	0.0806797	translation initiation factor IF-3
ugd	1.21229	0.277735	0.0420778	0.197521	0.704387	229.367	0.157344	UDP-glucose 6-dehydrogenase
allR	1.19655	0.258881	0.0422019	0.197712	0.703968	263.591	0.143614	DNA-binding transcriptional repressor AllR
C0067	0.734298	-0.445562	0.0422221	0.197712	0.703968	17.9347	0.509071
efeO	1.26537	0.339555	0.0426174	0.199359	0.700364	91.6364	0.212077	ferrous iron transport system protein EfeO
clpX	0.884922	-0.176377	0.0428236	0.20012	0.69871	1919.07	0.0909207	ATP-dependent Clp protease ATP-binding subunit ClpX
dosP	1.36517	0.449077	0.0430531	0.200173	0.698595	21.8262	0.443144	oxygen-sensing c-di-GMP phosphodiesterase DosP
lrhA	0.848571	-0.236893	0.0430513	0.200173	0.698595	348.115	0.12916	DNA-binding transcriptional dual regulator LrhA
rpsT	0.890748	-0.16691	0.0429158	0.200173	0.698595	19078.3	0.0866435	30S ribosomal subunit protein S20
ydgI	0.832923	-0.263745	0.0430397	0.200173	0.698595	227.895	0.148021	putative arginine:ornithine antiporter
yqjD	1.25213	0.324389	0.0430283	0.200173	0.698595	121.493	0.197991	ribosome- and membrane-associated DUF883 domain-containing protein YqjD
metN	0.765719	-0.385113	0.0435182	0.20213	0.694368	73.1826	0.26973	L-methionine/D-methionine ABC transporter ATP binding subunit
nfrA	0.78454	-0.35008	0.0437643	0.203068	0.692359	85.4963	0.225447	exopolysaccharide secretion system outer membrane protein NfrA
rrsC	0.85376	-0.228098	0.0438583	0.203299	0.691865	4767.78	0.124038	16S ribosomal RNA
arpA	0.78817	-0.343421	0.0442195	0.204354	0.689617	113.346	0.219519	regulator of acetyl CoA synthetase
panB	1.22787	0.296153	0.0442052	0.204354	0.689617	188.848	0.174599	3-methyl-2-oxobutanoate hydroxymethyltransferase
trpB	1.34866	0.431529	0.0441946	0.204354	0.689617	32.5793	0.366069	tryptophan synthase subunit &beta;
rlmE	0.877163	-0.189083	0.0443345	0.204679	0.688926	1058.1	0.0997251	23S rRNA 2'-<i>O</i>-ribose U2552 methyltransferase
aroC	1.20219	0.26566	0.0449653	0.206346	0.685405	236.445	0.150917	chorismate synthase
ldcC	0.765391	-0.385731	0.0449062	0.206346	0.685405	60.3496	0.273615	lysine decarboxylase 2
nfrB	0.775561	-0.366688	0.0449195	0.206346	0.685405	69.4958	0.248426	cyclic di-3',5'-guanylate-activated glycosyltransferase
srlE	1.14517	0.195566	0.044884	0.206346	0.685405	4.31618	0.388177	sorbitol-specific PTS enzyme IIBC<sub>1</sub> component
ybiU	1.27721	0.352996	0.0447864	0.206346	0.685405	81.4723	0.230752	DUF1479 domain-containing protein YbiU
yhjD	1.34992	0.432878	0.0449282	0.206346	0.685405	27.7217	0.382917	putative transporter YhjD
yeeN	0.869538	-0.201679	0.0450203	0.206392	0.685307	1044	0.107784	putative transcriptional regulator YeeN
glnX	1.13168	0.178467	0.0452061	0.207037	0.683953	833738	0.0936915	tRNA-Gln(CUG)
rraB	1.12815	0.173955	0.0454096	0.207762	0.682435	1602.47	0.0912649	ribonuclease E inhibitor protein B
ssuA	1.0602	0.084338	0.0454737	0.207847	0.682256	1.22833	0.32429	aliphatic sulfonate ABC transporter periplasmic binding protein
appA	1.34795	0.430771	0.0455494	0.207986	0.681966	18.3618	0.481255	periplasmic phosphoanhydride phosphatase/multiple inositol-polyphosphate phosphatase
glyS	0.882046	-0.181075	0.0457864	0.208861	0.680143	1368.93	0.095707	glycine&mdash;tRNA ligase subunit &beta;
yeaG	1.34957	0.432501	0.0459584	0.209437	0.678947	28.266	0.386424	protein kinase YeaG
yddM	0.856275	-0.223855	0.046085	0.209806	0.678183	557.626	0.122547	DNA-binding transcriptional regulator YddM
bdcA	1.33266	0.414309	0.0461556	0.209919	0.677949	21.7742	0.513618	c-di-GMP-binding biofilm dispersal mediator protein
htrL	0.862525	-0.213362	0.0462044	0.209933	0.67792	575.647	0.116225	protein HtrL
nudI	1.28321	0.359762	0.0466723	0.211849	0.673974	87.8956	0.243646	pyrimidine deoxynucleotide diphosphatase NudI
efeB	1.31094	0.390607	0.0468789	0.212577	0.672485	60.2746	0.287624	heme-containing peroxidase/deferrochelatase
rrsB	0.857002	-0.22263	0.0469344	0.212618	0.6724	5160.9	0.120136	16S ribosomal RNA
ycjX	0.757491	-0.400699	0.0470902	0.213114	0.671389	48.2172	0.311833	DUF463 domain-containing protein YcjX
yhiL	0.741669	-0.431152	0.0471651	0.213242	0.671127	27.5824	0.404367	DUF4049 domain-containing protein YhiL
hybO	1.32713	0.408305	0.0474571	0.21381	0.669971	40.8237	0.329324	hydrogenase 2 small subunit
nagC	1.22011	0.287009	0.0475238	0.21381	0.669971	157.481	0.170571	DNA-binding transcriptional dual regulator NagC
parC	0.876377	-0.190376	0.0474815	0.21381	0.669971	753.328	0.102149	DNA topoisomerase IV subunit A
yafV	1.2417	0.312321	0.0474687	0.21381	0.669971	123.712	0.1934	2-oxoglutaramate amidase
ymfA	0.793916	-0.332941	0.0474179	0.21381	0.669971	104.036	0.214335	putative inner membrane protein YmfA
oxyR	0.824793	-0.277896	0.0475979	0.213934	0.66972	189.358	0.163679	DNA-binding transcriptional dual regulator OxyR
rpoB	0.892922	-0.163395	0.0477963	0.214406	0.668763	7215.75	0.0862567	RNA polymerase subunit &beta;
yjcB	0.818789	-0.288437	0.0477796	0.214406	0.668763	175.537	0.172231	uncharacterized protein YjcB
eutD	1.07897	0.109655	0.0480867	0.215498	0.666557	1.79154	0.333871	phosphate acetyltransferase EutD
ybiC	1.32924	0.410603	0.0483394	0.216208	0.665128	36.7988	0.343575
yhdE	1.1873	0.24768	0.0482974	0.216208	0.665128	274.738	0.140681	nucleoside triphosphate pyrophosphatase YhdE
pdeF	0.760935	-0.394155	0.0484141	0.216331	0.66488	54.3083	0.300766	cyclic di-GMP phosphodiesterase PdeF
purN	0.806053	-0.311054	0.0489766	0.218419	0.660709	112.733	0.194076	phosphoribosylglycinamide formyltransferase 1
yahN	1.18433	0.244069	0.0489306	0.218419	0.660709	5.59798	0.427836	putative amino acid exporter YahN
ybeL	1.33894	0.421092	0.0490455	0.218514	0.66052	29.7128	0.381556	DUF1451 domain-containing protein YbeL
aroA	1.19853	0.26127	0.0495192	0.219615	0.658338	213.929	0.151853	3-phosphoshikimate 1-carboxyvinyltransferase
fepC	1.30302	0.38186	0.0494861	0.219615	0.658338	50.0228	0.283071	ferric enterobactin ABC transporter ATP binding subunit
hisL	1.15289	0.205261	0.0495318	0.219615	0.658338	1023.97	0.112498	<i>his</i> operon leader peptide
satP	0.775303	-0.367168	0.0494774	0.219615	0.658338	91.464	0.262061	acetate/succinate:H<sup>+</sup> symporter
sokX	0.808028	-0.307522	0.0493641	0.219615	0.658338	143.3	0.191625	small RNA SokX
ynaE	0.875966	-0.191053	0.0498746	0.220922	0.655762	2655.55	0.103875	Rac prophage; uncharacterized protein YnaE
rpmI	0.900078	-0.151877	0.0501876	0.222094	0.653464	11316.2	0.0805502	50S ribosomal subunit protein L35
napA	1.33325	0.414949	0.0508061	0.224614	0.648563	25.6257	0.410671	periplasmic nitrate reductase subunit NapA
ygaH	0.819201	-0.28771	0.0508865	0.224753	0.648295	171.061	0.175682	L-valine exporter, YgaH component
fklB	1.15135	0.203331	0.0509847	0.22497	0.647876	613.314	0.112188	peptidyl-prolyl <i>cis-trans</i> isomerase FklB
amiC	1.17153	0.228389	0.0514767	0.226586	0.644766	354.744	0.12933	<i>N</i>-acetylmuramoyl-L-alanine amidase C
lpxH	0.868931	-0.202687	0.0514991	0.226586	0.644766	821.57	0.112144	UDP-2,3-diacylglucosamine diphosphatase
rrlD	0.855818	-0.224624	0.0514576	0.226586	0.644766	5133.6	0.126926	23S ribosomal RNA
bcsC	1.25603	0.328872	0.0520791	0.228918	0.640319	116.038	0.217025	cellulose synthase outer membrane channel
yadS	0.794382	-0.332095	0.0521677	0.229089	0.639997	88.8675	0.221515	PF03458 family protein YadS
yibI	0.831428	-0.266338	0.0524705	0.230198	0.637899	8.1491	0.443751	DUF3302 domain-containing protein YibI
dppC	1.32439	0.405327	0.0526214	0.23064	0.637066	19.0543	0.465698	dipeptide ABC transporter membrane subunit DppC
uof	0.875193	-0.192327	0.0527734	0.231085	0.636228	1117.39	0.106141	RyhB-regulated <i>fur</i> leader peptide
tgt	0.888709	-0.170217	0.0531208	0.232301	0.63395	1355.74	0.0925607	tRNA-guanine transglycosylase
yhjA	0.806359	-0.310507	0.0531522	0.232301	0.63395	123.001	0.200338
galF	0.863125	-0.212358	0.0532128	0.232344	0.633868	1030.11	0.11962	UTP:glucose-1-phosphate uridylyltransferase, low activity
yfcA	1.22528	0.293108	0.0532998	0.232503	0.633572	131.886	0.183048	putative transporter YfcA
oxyS	0.760306	-0.395348	0.0535716	0.233466	0.631776	375.522	0.343181	small regulatory RNA OxyS
lolA	1.17803	0.236371	0.0538036	0.234255	0.630311	345.398	0.136558	outer membrane lipoprotein carrier protein
sgrR	0.776329	-0.365259	0.0539821	0.234809	0.629285	65.1781	0.270939	DNA-binding transcriptional dual regulator SgrR
tpx	1.1145	0.1564	0.0543287	0.236093	0.626916	2998.19	0.0846943	lipid hydroperoxide peroxidase
insL-1	0.819646	-0.286928	0.0543899	0.236135	0.626839	168.283	0.179171
ydfK	0.877365	-0.188752	0.0546425	0.237008	0.625237	2511.96	0.104934	Qin prophage; cold shock protein YdfK
ppx	1.21373	0.279448	0.0547156	0.237101	0.625067	181.673	0.171822	exopolyphosphatase
rrfF	0.848917	-0.236305	0.0548371	0.237403	0.624513	646.393	0.137667	5S ribosomal RNA
ydfP	0.765493	-0.385538	0.0549528	0.23768	0.624007	41.8512	0.31636
yihD	0.843133	-0.246167	0.0550087	0.237698	0.623975	272.049	0.145138	DUF1040 domain-containing protein YihD
pth	0.815404	-0.294412	0.0553767	0.238838	0.621896	176.389	0.187076	peptidyl-tRNA hydrolase
ubiE	0.872827	-0.196232	0.0553341	0.238838	0.621896	632.074	0.109965	bifunctional 2-octaprenyl-6-methoxy-1,4-benzoquinol methylase and demethylmenaquinone methyltransferase
glgP	1.20916	0.274004	0.0554572	0.23896	0.621674	171.085	0.167862	glycogen phosphorylase
ygeK	0.781089	-0.356441	0.0558235	0.240313	0.619222	13.0225	0.488273	putative DNA-binding transcriptional regulator YgeK
yccX	1.31383	0.393779	0.0563386	0.242304	0.61564	18.3936	0.451888	acylphosphatase
yegH	1.28687	0.363865	0.0565262	0.242883	0.614603	75.2933	0.275214	inner membrane protein YegH
speG	0.843704	-0.245191	0.0567138	0.243461	0.613571	233.219	0.145779	spermidine <i>N</i>-acetyltransferase
fabH	0.876766	-0.189736	0.0570391	0.2444	0.611899	908.037	0.106654	3-oxoacyl-[acyl carrier protein] synthase 3
yjeI	1.26682	0.341211	0.0569993	0.2444	0.611899	66.925	0.242946	DUF4156 domain-containing lipoprotein YjeI
ybgD	1.20908	0.273912	0.0572058	0.244886	0.611036	8.39118	0.445175	putative fimbrial protein YbgD
pabB	1.24336	0.31424	0.0572733	0.244946	0.61093	103.993	0.209794	aminodeoxychorismate synthase subunit 1
rybA	1.10824	0.148266	0.0573352	0.244983	0.610865	4267.06	0.0809646	small RNA RybA
yggN	0.834534	-0.260958	0.0576292	0.24601	0.609048	217.404	0.159084	DUF2884 domain-containing protein YggN
yiiD	1.26479	0.338895	0.0577277	0.246201	0.60871	80.5217	0.240888
evgL	0.810805	-0.302574	0.0578785	0.246386	0.608383	123.908	0.198677	protein EvgL
ppiD	0.886415	-0.173945	0.0578522	0.246386	0.608383	1298.5	0.0969468	periplasmic folding chaperone
atoE	1.11187	0.152986	0.057993	0.246417	0.60833	3.48302	0.355737	short chain fatty acid transporter
ydjZ	1.31008	0.389655	0.0579587	0.246417	0.60833	20.1384	0.432652	DedA family protein YdjZ
ybhP	1.10638	0.14585	0.0582427	0.247249	0.606866	3.19439	0.352429	endonuclease/exonuclease/phosphatase domain-containing protein YbhP
kbaY	1.05132	0.0722036	0.0587189	0.248599	0.604501	1.25937	0.320229	tagatose-1,6-bisphosphate aldolase 1
purR	0.876764	-0.189739	0.0587233	0.248599	0.604501	680.346	0.107484	DNA-binding transcriptional repressor PurR
uspE	0.88508	-0.17612	0.0587097	0.248599	0.604501	822.445	0.0988208	universal stress protein E
araJ	0.798284	-0.325025	0.0590331	0.249244	0.603375	78.0668	0.225458	putative transport protein AraJ
yaiY	0.868782	-0.202933	0.0590386	0.249244	0.603375	5.5451	0.389878	DUF2755 domain-containing inner membrane protein YaiY
yehT	1.26336	0.337264	0.0589699	0.249244	0.603375	89.1509	0.240799
dgcZ	0.811856	-0.300704	0.059361	0.250145	0.601808	283.736	0.198153	diguanylate cyclase DgcZ
istR	0.864283	-0.210424	0.0593297	0.250145	0.601808	687.533	0.121917	small regulatory RNA IstR-1 // small RNA IstR-2
yfdH	0.884408	-0.177216	0.0594407	0.250251	0.601625	1413.23	0.0999984	CPS-53 (KpLE1) prophage; bactoprenol glucosyl transferase
rrfH	0.84984	-0.234736	0.0595005	0.250273	0.601586	498.608	0.139817	5S ribosomal RNA
emrK	0.874631	-0.193254	0.0599159	0.25162	0.599255	4.89424	0.382612	tripartite efflux pump membrane fusion protein EmrK
ybbD	0.879248	-0.185658	0.0599303	0.25162	0.599255	4.30026	0.377013	putative uncharacterized protein YbbD
yaaJ	1.28873	0.365954	0.06011	0.251913	0.598749	47.2134	0.295744	putative transporter YaaJ
yjjA	0.792816	-0.334942	0.0600845	0.251913	0.598749	78.8981	0.241183	DUF2501 domain-containing protein YjjA
feaR	1.28769	0.364781	0.0605335	0.253457	0.596096	46.6097	0.293541	DNA-binding transcriptional activator FeaR
yceA	0.872072	-0.197481	0.0609607	0.255012	0.593439	635.968	0.113849
rpsP	0.905816	-0.14271	0.0613376	0.255889	0.591948	4903.5	0.0791481	30S ribosomal subunit protein S16
yifK	0.860889	-0.216101	0.0612376	0.255889	0.591948	429.381	0.127165	putative transporter YifK
yqiC	0.876941	-0.189449	0.0613341	0.255889	0.591948	726.626	0.108595
yeaC	1.21756	0.283993	0.0614116	0.255966	0.591819	157.207	0.183647	DUF1315 domain-containing protein YeaC
yddA	0.779558	-0.359273	0.0614976	0.256091	0.591605	15.0563	0.466185	ABC transporter family protein YddA
arnB	0.849507	-0.235303	0.061899	0.257529	0.589173	7.01333	0.413529	UDP-4-amino-4-deoxy-L-arabinose aminotransferase
sbcB	1.22355	0.291077	0.0619957	0.257698	0.58889	123.854	0.190946	exodeoxyribonuclease I
fhuE	1.25967	0.333044	0.0624416	0.259316	0.58617	88.3095	0.241173	ferric coprogen/ferric rhodotorulic acid outer membrane transporter
fabF	0.897343	-0.156268	0.0627324	0.259819	0.58533	3833.67	0.087854	3-oxoacyl-[acyl carrier protein] synthase 2
ycfZ	0.791035	-0.338187	0.0627238	0.259819	0.58533	72.271	0.251966	putative inner membrane protein YcfZ
yohK	1.27405	0.349422	0.0626236	0.259819	0.58533	83.8222	0.268745	putative 3-hydroxypropanoate export protein YohK
bcr	1.17408	0.231534	0.0629433	0.260222	0.584655	288.043	0.139361	multidrug efflux pump Bcr
yoeA	0.797811	-0.325882	0.0628997	0.260222	0.584655	76.9103	0.233873	CP4-44 prophage; TonB-dependent receptor plug domain-containing protein YoeA
csrC	1.1235	0.168001	0.0631636	0.260664	0.58392	1563.35	0.0952489	small regulatory RNA CsrC
rrsE	0.863591	-0.211579	0.0631525	0.260664	0.58392	4414.93	0.1253	16S ribosomal RNA
emrD	0.8219	-0.282966	0.0634979	0.261808	0.582018	161.122	0.185525	multidrug efflux pump EmrD
argA	1.29471	0.372633	0.0636236	0.26209	0.581549	36.8434	0.333614	N-acetylglutamate synthase
argP	1.19951	0.262447	0.0638939	0.262968	0.580098	216.528	0.166236	DNA-binding transcriptional dual regulator ArgP
infB	0.887468	-0.172234	0.0640937	0.263426	0.579342	6567	0.0985813	translation initiation factor IF-2&beta;' // translation initiation factor IF-2&beta; // translation initiation factor IF-2
rrlG	0.86035	-0.217004	0.0641834	0.263426	0.579342	4741.49	0.129789	23S ribosomal RNA
spy	1.25581	0.328616	0.0642348	0.263426	0.579342	91.0378	0.238705	ATP-independent periplasmic chaperone
yedV	1.21844	0.285038	0.064167	0.263426	0.579342	128.92	0.18782
ygiN	1.15013	0.201799	0.0644152	0.26393	0.578512	522.039	0.118482	putative quinol monooxygenase YgiN
ydhZ	1.22536	0.293211	0.0647278	0.264974	0.576797	125.295	0.197373
dusA	0.871009	-0.199241	0.0650222	0.265942	0.575213	542.598	0.119043	tRNA-dihydrouridine synthase A
pepE	1.24692	0.318373	0.0651089	0.26606	0.575021	12.1013	0.455398	peptidase E
mglA	1.24411	0.315114	0.0652505	0.266401	0.574465	12.3675	0.45798	D-galactose/methyl-galactoside ABC transporter ATP binding subunit
yfbO	0.81525	-0.294685	0.065356	0.266594	0.574149	10.2894	0.448279	uncharacterized protein YfbO
lepB	0.87158	-0.198296	0.0655066	0.266972	0.573535	598.389	0.116976	signal peptidase I
fecA	0.893971	-0.1617	0.0656001	0.267115	0.573302	4292.93	0.0923263	ferric citrate outer membrane transporter
folP	0.827919	-0.272438	0.0657254	0.267151	0.573243	153.787	0.177237	dihydropteroate synthase
tldD	1.14578	0.196328	0.065693	0.267151	0.573243	469.091	0.115211	metalloprotease subunit TldD
pdhR	0.903608	-0.146231	0.0660249	0.267894	0.572037	6855	0.0829361	DNA-binding transcriptional dual regulator PdhR
spy_3'	1.28934	0.366637	0.0659677	0.267894	0.572037	53.0665	0.327662
pheL	1.13877	0.187476	0.0660918	0.267929	0.571981	712.877	0.109366	<i>phe</i> operon leader peptide
yhgO	1.25084	0.3229	0.0661732	0.268022	0.57183	12.7451	0.456891	protein YhgO
glnW	1.13512	0.182848	0.0662668	0.268164	0.571599	666537	0.106217	tRNA-Gln(UUG)
pyrH	0.863548	-0.211652	0.066346	0.268248	0.571463	468.679	0.126793	UMP kinase
bfd	1.24231	0.313031	0.0668981	0.270005	0.568629	110.555	0.223859	bacterioferritin-associated ferredoxin
cas1	0.810418	-0.303262	0.0668452	0.270005	0.568629	11.0421	0.451113	multifunctional nuclease Cas1
tdcA	0.772174	-0.373003	0.0672182	0.271058	0.566937	27.1783	0.380215	DNA-binding transcriptional activator TdcA
yhiM	0.779221	-0.359896	0.0673592	0.271389	0.566409	19.9722	0.425712	inner membrane protein YhiM
ftsQ	0.860845	-0.216175	0.067802	0.272933	0.563944	338.676	0.130921	cell division protein FtsQ
znuA		-0.185692	0.0682934	0.27467	0.561189	722.151	0.109304	Zn<sup>2+</sup> ABC transporter periplasmic binding protein
fimZ	0.784279	-0.350561	0.0684361	0.275003	0.560663	16.3126	0.440035	putative LuxR family transcriptional regulator FimZ
prfB	0.882148	-0.180907	0.0685177	0.27509	0.560525	808.304	0.106191	peptide chain release factor RF2
insAB-1	0.840177	-0.251235	0.0687015	0.275587	0.559742	179.088	0.160321
gntK	1.24977	0.321664	0.0687857	0.275683	0.559589	73.1687	0.239071	D-gluconate kinase, thermostable
yhhJ	0.790209	-0.339693	0.0688912	0.275866	0.559303	14.8793	0.44769	ABC transporter family protein YhhJ
truC	0.793573	-0.333565	0.0689755	0.275889	0.559266	59.4725	0.258052	tRNA pseudouridine<sup>65</sup> synthase
yjaG	0.866607	-0.20655	0.0690173	0.275889	0.559266	378.13	0.124491	DUF416 domain-containing protein YjaG
mtn	0.883614	-0.178512	0.0693486	0.276972	0.557564	703.175	0.104897	5'-methylthioadenosine/S-adenosylhomocysteine nucleosidase
yncJ	1.28953	0.366851	0.0695378	0.277486	0.556759	38.512	0.396903	DUF2554 domain-containing protein YncJ
mraY	0.859084	-0.219129	0.0700399	0.279247	0.554012	324.137	0.134739	phospho-N-acetylmuramoyl-pentapeptide-transferase
ypdK	1.22742	0.295633	0.0701036	0.279258	0.553994	98.0273	0.206163	uncharacterized membrane protein YpdK
pdxB	1.1791	0.237688	0.0703323	0.279684	0.553333	259.54	0.149574	erythronate-4-phosphate dehydrogenase
yjdC	1.28284	0.359338	0.0702721	0.279684	0.553333	44.4496	0.323506	putative DNA-binding transcriptional regulator YjdC
argO	0.802276	-0.317829	0.070985	0.282035	0.549697	68.9101	0.238616	L-arginine exporter
pcm	1.17903	0.2376	0.0711563	0.282471	0.549026	222.505	0.150055	protein-L-isoaspartate <i>O</i>-methyltransferase
yjgM	0.79305	-0.334516	0.072033	0.285704	0.544084	63.3083	0.268611	putative <i>N</i>-acetyltransferase YjgM
ddpC	1.12427	0.16899	0.0722098	0.285926	0.543746	4.25492	0.363529	putative D,D-dipeptide ABC transporter membrane subunit DdpC
pgpB	1.21389	0.279632	0.0722137	0.285926	0.543746	145.567	0.190847	phosphatidylglycerophosphatase B
mutY	1.17575	0.233587	0.0723631	0.286271	0.543223	264.544	0.147758	adenine DNA glycosylase
gspC	0.846254	-0.240838	0.0724634	0.286421	0.542996	8.80176	0.409688	type II secretion system protein GspC
wbbK	1.11648	0.158962	0.072697	0.287097	0.541971	1415.78	0.0930587	putative glycosyltransferase WbbK
ykgF	1.22217	0.289445	0.073212	0.288882	0.53928	11.4125	0.436082	putative amino acid dehydrogenase with NAD(P)-binding domain and ferridoxin-like domain
htrE	0.780416	-0.357685	0.0734774	0.289431	0.538454	32.0246	0.362746	putative fimbrial usher protein HtrE
ycfJ	0.851581	-0.231785	0.0734431	0.289431	0.538454	224.634	0.147027	PF05433 family protein YcfJ
fecI	0.880917	-0.182922	0.0740102	0.29128	0.535689	1608.81	0.11002	RNA polymerase sigma factor FecI
treC	1.25101	0.323088	0.0745473	0.293019	0.533104	15.0166	0.43519	trehalose-6-phosphate hydrolase
ycfL	1.17887	0.237401	0.0745798	0.293019	0.533104	199.687	0.152608	DUF1425 domain-containing protein YcfL
ascG	1.26377	0.337735	0.0749372	0.294172	0.531399	49.2539	0.282046	DNA-binding transcriptional repressor AscG
aroE	1.17219	0.229209	0.0755628	0.296296	0.528274	290.765	0.146021	shikimate dehydrogenase
yigA	1.18403	0.243708	0.0756074	0.296296	0.528274	188.601	0.158712	DUF484 domain-containing protein YigA
ygdR	0.854465	-0.226907	0.0757527	0.296612	0.527812	236.679	0.144438	DUF903 domain-containing lipoprotein YgdR
hslO	0.82104	-0.284475	0.0758949	0.296887	0.527409	136.225	0.20193	molecular chaperone Hsp33
purF	0.837331	-0.256131	0.0759616	0.296887	0.527409	162.75	0.171127	amidophosphoribosyltransferase
rpoN	1.12332	0.167765	0.0760568	0.296887	0.527409	1033.28	0.100199	RNA polymerase sigma factor RpoN
yniA	1.26786	0.342391	0.0760816	0.296887	0.527409	22.1518	0.404283	putative kinase YniA
pitB	0.827147	-0.273785	0.0763286	0.297597	0.526371	10.6787	0.424878	metal phosphate:H<sup>+</sup> symporter PitB
glpE	1.16659	0.222293	0.0764394	0.297776	0.52611	293.88	0.140866	thiosulfate sulfurtransferase GlpE
entB	1.26796	0.34251	0.0766321	0.298274	0.525385	43.3588	0.306416	<i>holo</i> EntB // enterobactin synthase component B
cysM	1.26229	0.336045	0.0774132	0.300804	0.521717	45.0526	0.289035	cysteine synthase B
ompW	1.24141	0.311983	0.0773579	0.300804	0.521717	17.4513	0.431526	outer membrane protein W
glgB	1.25074	0.322785	0.0776542	0.301485	0.520734	66.7416	0.260866	1,4-alpha-glucan branching enzyme
rsfS	0.867039	-0.205832	0.0783102	0.303775	0.517448	348.613	0.129029	ribosomal silencing factor RsfS
ycgJ	0.803069	-0.316405	0.078523	0.304343	0.516637	71.3127	0.250865	PF05666 family protein YcgJ
sraB	0.85724	-0.222229	0.0787502	0.304966	0.515748	299.396	0.142595	small RNA SraB
fimE	0.785782	-0.347799	0.0789311	0.305409	0.515119	33.1689	0.343566	regulator for fimA
accC	0.898754	-0.154002	0.079211	0.305812	0.514546	2317.32	0.0922289	biotin carboxylase
mhpF	1.08855	0.122406	0.0792351	0.305812	0.514546	2.48435	0.338351	acetaldehyde dehydrogenase (acetylating) MhpF
nupC	1.20585	0.270047	0.0792124	0.305812	0.514546	137.032	0.187916	nucleoside:H<sup>+</sup> symporter NupC
lptE	0.880231	-0.184046	0.0795231	0.306665	0.513336	603.082	0.113203	lipopolysaccharide assembly protein LptE
fusA	0.911728	-0.133325	0.0796622	0.306767	0.513191	23807.3	0.0789098	elongation factor G
lysT	1.12271	0.166986	0.0796833	0.306767	0.513191	231262	0.0990943	tRNA-Lys(UUU)
dsdC	0.789444	-0.341091	0.0799005	0.307088	0.512737	22.6482	0.393577	DNA-binding transcriptional dual regulator DsdC
ubiG	1.18982	0.250743	0.0798696	0.307088	0.512737	151.058	0.168917	bifunctional 3-demethylubiquinone-<i>8</i> 3-<i>O</i>-methyltransferase and 2-octaprenyl-6-hydroxyphenol methylase
yhcG	0.842058	-0.248008	0.0803264	0.308467	0.510792	172.195	0.166758	DUF1016 domain-containing protein YhcG
dtpA	0.901163	-0.150139	0.0805281	0.308983	0.510066	1482.75	0.0900778	dipeptide/tripeptide:H<sup>+</sup> symporter DtpA
yeaW	1.18932	0.250142	0.0805989	0.308996	0.510047	10.2615	0.407917	carnitine monooxygenase subunit YeaW
yfhG	1.25694	0.329916	0.0806768	0.309037	0.50999	51.8525	0.282334
mrp	1.14092	0.190204	0.0808719	0.309525	0.509304	430.107	0.118116	P-loop NTPase family protein Mrp
yhhY	1.26016	0.333611	0.0812035	0.310536	0.507888	42.5882	0.298837	<i>N</i>-acetyltransferase YhhY
rrsD	0.789985	-0.340102	0.081411	0.31107	0.507142	4340.95	0.329962	16S ribosomal RNA
rplC	0.908805	-0.137957	0.0817168	0.311719	0.506236	11899.9	0.0825183	50S ribosomal subunit protein L3
yjgN	0.791695	-0.336983	0.0816577	0.311719	0.506236	40.8765	0.317909	inner membrane protein YjgN
rplB	0.900896	-0.150567	0.0818405	0.311932	0.50594	10899.6	0.0909349	50S ribosomal subunit protein L2
lsrR	1.19846	0.26118	0.0819168	0.311964	0.505896	10.3789	0.414029	DNA-binding transcriptional repressor LsrR
fimB	1.17473	0.232328	0.0824379	0.313036	0.504406	315.47	0.153631	Type 1 fimbriae regulatory protein FimB
hcaE	1.26624	0.340549	0.0825241	0.313036	0.504406	27.9191	0.352299	putative 3-phenylpropionate/cinnamate dioxygenase subunit &alpha;
rrfC	0.856889	-0.222821	0.0822986	0.313036	0.504406	510.433	0.145372	5S ribosomal RNA
symE	0.794663	-0.331584	0.0825394	0.313036	0.504406	46.3946	0.298083	nucleoid-associated protein SymE
ybaY	1.2378	0.307779	0.0825239	0.313036	0.504406	69.3577	0.244807	PF09619 family lipoprotein YbaY
narX	1.17936	0.237999	0.0831968	0.315269	0.501319	175.638	0.159151	sensor histidine kinase NarX
uxaA	0.792474	-0.335564	0.083334	0.315528	0.500962	21.4672	0.387966	D-altronate dehydratase
ghoS	1.12863	0.174577	0.0836372	0.316415	0.499743	4.42186	0.364495	antitoxin of the GhoTS toxin-antitoxin system
ftsB	0.874692	-0.193153	0.0837938	0.316746	0.499289	397.062	0.12205	cell division protein FtsB
yibA	0.816901	-0.291768	0.084101	0.317646	0.498057	84.6706	0.221725	putative lyase containing HEAT-repeat
yadN	0.792835	-0.334907	0.0857547	0.323424	0.490228	27.771	0.351618	putative fimbrial protein YadN
ydfT	1.26114	0.334733	0.0858054	0.323424	0.490228	25.298	0.369408	Qin prophage; putative antitermination protein Q
yhhZ	1.23563	0.305243	0.0858423	0.323424	0.490228	14.3887	0.413669	putative endonuclease YhhZ
srlD	1.21345	0.279113	0.0860211	0.323552	0.490056	12.5307	0.415716	sorbitol-6-phosphate 2-dehydrogenase
yedI	1.24704	0.31851	0.0860878	0.323552	0.490056	51.2225	0.274573	DUF808 domain-containing inner membrane protein YedI
yfiE	0.819986	-0.286328	0.0859841	0.323552	0.490056	95.6961	0.216615	putative LysR-type DNA-binding transcriptional regulator YfiE
barA	0.860229	-0.217208	0.0862893	0.323779	0.489752	295.403	0.143075	BarA-<i>N</i>-phospho-L-histidine-861 // BarA-<i>N</i>-phospho-L-histidine-302 // BarA-phospho-L-aspartate-718 // sensor histidine kinase BarA
hisG	1.22705	0.295194	0.0862232	0.323779	0.489752	97.4744	0.230842	ATP phosphoribosyltransferase
ydfZ	0.822338	-0.282196	0.086422	0.324012	0.489439	93.8807	0.211582	putative selenoprotein YdfZ
sfmH	0.916498	-0.125797	0.0867775	0.325079	0.488011	2.74897	0.339249	putative fimbrial adhesin protein SfmH
chbC	0.795716	-0.329674	0.0871511	0.32616	0.48657	35.1731	0.320757	<i>N,N'</i>-diacetylchitobiose-specific PTS enzyme IIC component
rplX	0.914239	-0.129356	0.0872081	0.32616	0.48657	8747.92	0.078454	50S ribosomal subunit protein L24
yfaQ	1.16418	0.219316	0.0876214	0.327172	0.485224	6.71533	0.389282	tandem DUF2300 domain-containing protein YfaQ
ymgA	0.79554	-0.329994	0.0875888	0.327172	0.485224	33.0871	0.329504	putative two-component system connector protein YmgA
gfcA	0.809757	-0.304439	0.0880855	0.328371	0.483635	66.768	0.249504	threonine-rich inner membrane protein GfcA
ymjC	1.10405	0.142802	0.0880541	0.328371	0.483635	3.37787	0.346682	putative uncharacterized protein YmjC
yidF	1.2175	0.283921	0.0883502	0.32909	0.482685	88.132	0.216175	uncharacterized protein YidF
atpF	1.0997	0.137111	0.0890756	0.331254	0.479838	2681.62	0.083895	ATP synthase F<sub>o</sub> complex subunit b
yadV	0.81435	-0.296279	0.0890055	0.331254	0.479838	18.047	0.410133	putative fimbrial chaperone YadV
dmsD	1.17339	0.230685	0.0892134	0.331498	0.479519	201.191	0.156758	redox enzyme maturation protein DmsD
bglG	0.844999	-0.242979	0.0897073	0.332554	0.478138	10.6126	0.398956	transcriptional antiterminator BglG
dtd	1.21895	0.28564	0.0896116	0.332554	0.478138	91.1573	0.220628	D-aminoacyl-tRNA deacylase
ygeW	1.14778	0.198844	0.089715	0.332554	0.478138	5.89207	0.376435	putative carbamoyltransferase YgeW
ytfB	1.17937	0.238022	0.089851	0.33279	0.47783	169.303	0.164105	cell division protein YtfB
fucP	1.24581	0.317089	0.0903573	0.334137	0.476075	18.8697	0.387132	L-fucose:H+ symporter
ybgJ	1.24639	0.317756	0.0903606	0.334137	0.476075	44.63	0.286513
hycI	1.23963	0.309907	0.0906007	0.334756	0.475272	17.1338	0.394659	hydrogenase 3 maturation protease
malI	1.22588	0.293824	0.0908095	0.335257	0.474622	74.9644	0.234852	DNA-binding transcriptional repressor MalI
hupB	0.913234	-0.130944	0.0908969	0.33531	0.474553	3233.82	0.0804003	DNA-binding protein HU-&beta;
yqiJ	0.81829	-0.289315	0.0910734	0.335691	0.47406	120.075	0.229835	DUF1449 domain-containing inner membrane protein YqiJ
ampH	1.19698	0.259394	0.0915672	0.336511	0.473001	113.393	0.188876	peptidoglycan DD-carboxypeptidase/peptidoglycan DD-endopeptidase
dapE	0.841159	-0.24955	0.0917678	0.336511	0.473001	138.843	0.177863	succinyl-diaminopimelate desuccinylase
epmB	0.888278	-0.170918	0.091517	0.336511	0.473001	592.317	0.108596	lysine 2,3-aminomutase
G0-10702	0.833062	-0.263504	0.0917976	0.336511	0.473001	157.077	0.194352
glcD	1.12956	0.175766	0.0916906	0.336511	0.473001	5.0725	0.36367	glycolate dehydrogenase, putative FAD-linked subunit
radD	1.20942	0.27431	0.0918824	0.336511	0.473001	96.6704	0.207144	putative DNA repair helicase RadD
sfmA	0.858196	-0.220621	0.0914	0.336511	0.473001	8.75439	0.388508	putative fimbrial protein SfmA
ycgX	0.83711	-0.25651	0.0918497	0.336511	0.473001	119.679	0.185488	DUF1398 domain-containing protein YcgX
nikR	0.799799	-0.322291	0.0922233	0.33749	0.471739	34.9656	0.317957	DNA-binding transcriptional repressor NikR
yqeH	0.8053	-0.312401	0.0926735	0.338867	0.46997	25.7211	0.380003	putative LuxR family transcriptional regulator YqeH
btuD	1.23076	0.299546	0.0930452	0.339956	0.468578	72.1454	0.251129	vitamin B<sub>12</sub> ABC transporter ATP binding subunit
nanS	0.902334	-0.148267	0.0933457	0.340782	0.467523	3.87185	0.349086	<i>N</i>-acetyl-9-<i>O</i>-acetylneuraminate esterase
intQ	0.816085	-0.293209	0.0934478	0.340884	0.467393	18.2443	0.40049	Qin prophage; putative defective integrase
micF	0.86694	-0.205996	0.0937596	0.34175	0.466292	1074.2	0.137989	small regulatory RNA MicF
yciH	0.810879	-0.302441	0.0947555	0.345106	0.462048	60.8025	0.258945	putative translation factor
entH	1.24768	0.319246	0.0952191	0.346519	0.460273	26.1003	0.35197	proofreading thioesterase in enterobactin biosynthesis
ytgA	1.14083	0.190082	0.0953242	0.346627	0.460138	394.781	0.124826	protein YtgA
cmoM	0.84717	-0.239277	0.0955278	0.346816	0.459901	185.895	0.170104	tRNA <b>cmo</b><sup>5</sup>U34 methyltransferase
IS128	0.821935	-0.282904	0.0956297	0.346816	0.459901	17.8274	0.397634
mdtK	0.855961	-0.224383	0.0957489	0.346816	0.459901	202.615	0.155297	multidrug efflux pump MdtK
pdeR	0.817841	-0.290108	0.0958483	0.346816	0.459901	80.1148	0.237349	cyclic di-GMP phosphodiesterase PdeR
pheM	0.870342	-0.200346	0.0959052	0.346816	0.459901	329.892	0.133757	<i>pheST-ihfA</i> operon leader peptide
yebZ	1.17122	0.228009	0.0958071	0.346816	0.459901	173.373	0.159019	CopD family protein
yfjY	1.07345	0.102253	0.0956791	0.346816	0.459901	2.00377	0.328877	CP4-57 prophage; RadC-like JAB domain-containing protein YfjY
rarD	0.859234	-0.218876	0.0963153	0.348024	0.45839	225.187	0.150593	putative transporter RarD
ycgN	0.838071	-0.254856	0.0966111	0.348819	0.4574	128.383	0.188782	putative metal-chelating domain-containing protein YcgN
ridA	1.11574	0.158006	0.0968645	0.349459	0.456604	926.646	0.100886	enamine/imine deaminase, redox-regulated chaperone
yibH	0.865243	-0.208822	0.0970339	0.349795	0.456187	6.94872	0.379927	inner membrane protein YibH
nrfE	0.892031	-0.164834	0.0975515	0.349798	0.456183	4.98514	0.356743	putative cytochrome c-type biogenesis protein NrfE
rcsB	1.1122	0.153422	0.0972987	0.349798	0.456183	890.2	0.097412	RcsB-acetylated // DNA-binding transcriptional dual regulator RcsB-phosphorylated // DNA-binding transcriptional activator RcsB
rpsO	0.916169	-0.126314	0.0973593	0.349798	0.456183	15324.4	0.0790937	30S ribosomal subunit protein S15
xylA	0.80689	-0.309556	0.0974875	0.349798	0.456183	42.241	0.289223	xylose isomerase
yfeC	1.13269	0.179756	0.0972796	0.349798	0.456183	481.097	0.117507	DNA-binding transcriptional dual regulator YfeC
yibQ	1.1597	0.213756	0.0975684	0.349798	0.456183	230.37	0.146319	divergent polysaccharide deacetylase domain-containing protein YibQ
ypfG	1.23604	0.305724	0.0973666	0.349798	0.456183	48.4366	0.276527	DUF1176 domain-containing protein YpfG
cobT	1.2398	0.310105	0.0977341	0.34981	0.456168	25.4509	0.365697	nicotinate-nucleotide&mdash;dimethylbenzimidazole phosphoribosyltransferase
rrsG	0.878904	-0.186223	0.0977615	0.34981	0.456168	3522.11	0.125802	16S ribosomal RNA
soxS	1.14923	0.200663	0.0978004	0.34981	0.456168	323.816	0.134913	DNA-binding transcriptional dual regulator SoxS
insH-3	1.12173	0.16573	0.0979759	0.350165	0.455728	583.471	0.106979
sanA	0.841405	-0.249127	0.0986281	0.352221	0.453184	160.027	0.183697	DUF218 domain-containing protein SanA
gltW	0.897288	-0.156357	0.098835	0.352686	0.452612	720331	0.100588	tRNA-Glu(UUC)
rpsG	0.91617	-0.126312	0.0993532	0.354259	0.450679	10393.7	0.0795032	30S ribosomal subunit protein S7
syd	0.871712	-0.198077	0.0996204	0.354936	0.44985	380.992	0.133796	SecY-interacting protein
waaQ	0.875584	-0.191683	0.0998615	0.355353	0.44934	339.096	0.128368	lipopolysaccharide core heptosyltransferase 3
yiaA	0.824875	-0.277752	0.0998921	0.355353	0.44934	15.4275	0.395049	PF05360 family inner membrane protein YiaA
cdh	0.818947	-0.288157	0.100946	0.358825	0.445117	60.9396	0.242719	CDP-diacylglycerol diphosphatase
yaeP	0.840337	-0.250961	0.101231	0.359352	0.44448	159.383	0.188112	PF06786 family protein YaeP
ybjQ	1.23259	0.301697	0.10133	0.359352	0.44448	49.2665	0.275138	putative heavy metal binding protein YbjQ
ycfP	1.16829	0.224397	0.101281	0.359352	0.44448	188.844	0.158639	PF05728 family protein YcfP
bglB	1.16872	0.224935	0.101557	0.359879	0.443843	9.11195	0.384702	6-phospho-&beta;-glucosidase B
ltaE	1.20831	0.272985	0.101883	0.360758	0.442784	85.1551	0.21797	low-specificity L-threonine aldolase
rluD	0.865357	-0.208633	0.102748	0.363538	0.43945	427.441	0.144889	23S rRNA pseudouridine<sup>1911/1915/1917</sup> synthase
rimL	1.2071	0.271544	0.103197	0.364846	0.43789	83.8314	0.217321	ribosomal-protein-L12-serine <i>N</i>-acetyltransferase
yibX	0.816554	-0.292379	0.103401	0.365288	0.437364	59.4437	0.258767	protein YibX-S // protein YibX
atoB	1.14567	0.19619	0.103569	0.3656	0.436994	8.75104	0.371206	acetyl-CoA acetyltransferase
rseA	0.906202	-0.142095	0.104192	0.367084	0.435234	1971.03	0.0920537	anti-sigma-E factor RseA
yagB	1.22968	0.298278	0.10423	0.367084	0.435234	47.9122	0.275311	CP4-6 prophage; orphan antitoxin YagB
yfjD	0.865545	-0.20832	0.104157	0.367084	0.435234	259.568	0.145232	UPF0053 family inner membrane protein YfjD
cysS	0.883133	-0.179297	0.105158	0.369786	0.43205	502.874	0.120633	cysteine&mdash;tRNA ligase
yejF	1.20751	0.27204	0.1051	0.369786	0.43205	79.6304	0.221185	putative oligopeptide ABC transporter ATP binding subunit YejF
clcB	1.22653	0.294579	0.105738	0.371539	0.429996	49.428	0.268308	putative chloride:H<sup>+</sup> antiporter ClcB
tdcG	0.825511	-0.276641	0.105956	0.371737	0.429764	74.4085	0.231356	L-serine deaminase III
yebW	1.21556	0.281623	0.105897	0.371737	0.429764	62.0651	0.239066	DUF1482 domain-containing protein YebW
yggP	1.11818	0.16115	0.106777	0.374331	0.426745	5.08066	0.352512	putative zinc-binding dehydrogenase YggP
ycjT	1.16379	0.218836	0.106967	0.374712	0.426303	8.05057	0.379421	kojibiose phosphorylase
cysU	0.912589	-0.131963	0.107509	0.375747	0.425105	3.94285	0.339827	sulfate/thiosulfate ABC transporter inner membrane subunit CysU
eutB	1.19584	0.258026	0.107518	0.375747	0.425105	12.1303	0.387498	ethanolamine ammonia-lyase subunit &alpha;
hfq	0.910183	-0.135771	0.10759	0.375747	0.425105	1554.11	0.0883427	RNA-binding protein Hfq
priC	0.815552	-0.294152	0.107395	0.375747	0.425105	24.8241	0.362158	primosomal replication protein N''
trpA	1.22585	0.293781	0.109652	0.38261	0.417244	44.8975	0.280133	tryptophan synthase subunit &alpha;
ylbH	0.813572	-0.297657	0.109722	0.38261	0.417244	26.0746	0.346508	putative RHS domain-containing protein YlbH
ygfK	0.833491	-0.262761	0.110162	0.383852	0.415836	14.5472	0.385372	putative oxidoreductase, Fe-S subunit
ydcO	1.21257	0.278067	0.110372	0.384291	0.415339	18.7153	0.376716	putative transport protein YdcO
ydiK	1.19672	0.259083	0.110456	0.384294	0.415336	116.524	0.208025	putative transporter YdiK
rppH	1.12449	0.169267	0.110726	0.384743	0.414829	489.109	0.114524	RNA pyrophosphohydrolase
ybaV	0.813955	-0.29698	0.110753	0.384743	0.414829	38.7283	0.299692	helix-hairpin-helix 3 family protein
nrdH	0.813412	-0.297942	0.11102	0.384797	0.414768	36.033	0.315436	glutaredoxin-like protein NrdH
ycaR	1.16399	0.219075	0.111005	0.384797	0.414768	187.143	0.159562	PF03966 family protein YcaR
yhhH	0.814053	-0.296805	0.110862	0.384797	0.414768	29.0255	0.341162	PF15631 family protein YhhH
acrF	1.22297	0.29039	0.111164	0.385006	0.414533	51.1805	0.272572	multidrug efflux pump RND permease AcrF
gstB	1.21481	0.280734	0.11128	0.38501	0.414528	71.8503	0.246774	glutathione <i>S</i>-transferase GstB
hemG	0.857329	-0.22208	0.111333	0.38501	0.414528	158.733	0.163221	protoporphyrinogen oxidase
yciV	1.17768	0.235946	0.111449	0.385118	0.414406	143.517	0.17834
yjhF	0.818174	-0.28952	0.111861	0.386253	0.413128	46.0769	0.272347	KpLE2 phage-like element; putative transporter YjhF
glgC	1.21766	0.284114	0.111994	0.386297	0.413078	56.0433	0.255155	glucose-1-phosphate adenylyltransferase
nudL	1.18368	0.243283	0.112126	0.386297	0.413078	130.987	0.188376	putative NUDIX hydrolase with low 3-phosphohydroxypyruvate phosphatase activity
ydjF	0.833381	-0.262952	0.112092	0.386297	0.413078	84.826	0.216994	putative DNA-binding transcriptional regulator YdjF
smg	1.14644	0.197157	0.112469	0.386861	0.412445	359.851	0.139285	DUF494 domain-containing protein Smg
xylE	1.21452	0.280389	0.112543	0.386861	0.412445	23.5987	0.370502	D-xylose:H<sup>+</sup> symporter
yajD	0.854985	-0.226029	0.11238	0.386861	0.412445	167.889	0.168401	HNH nuclease family protein YajD
pntB	1.1718	0.228726	0.112803	0.387328	0.411922	171.462	0.171019	pyridine nucleotide transhydrogenase subunit &beta;
yjdM	0.85485	-0.226258	0.112847	0.387328	0.411922	150.484	0.16901	zinc ribbon domain-containing protein YjdM
cca	1.19165	0.252957	0.113056	0.387465	0.411768	197.538	0.201276	fused CCA tRNA nucleotidyltransferase/phosphohydrolase
dcyD	1.18681	0.247084	0.112973	0.387465	0.411768	109.925	0.19446	D-cysteine desulfhydrase
gsk	0.879044	-0.185993	0.113383	0.388293	0.410841	324.29	0.129878	inosine/guanosine kinase
waaY	0.880251	-0.184013	0.113544	0.388557	0.410545	388.832	0.128309	lipopolysaccharide core heptose (II) kinase
ubiF	1.18092	0.239912	0.113645	0.388612	0.410483	115.286	0.185208	3-demethoxyubiquinol 3-hydroxylase
ppiB	0.900434	-0.151307	0.113933	0.389305	0.40971	1368.97	0.10181	peptidyl-prolyl <i>cis-trans</i> isomerase B
orn	0.863096	-0.212407	0.11423	0.390032	0.4089	236.168	0.155153	oligoribonuclease
yghT	0.927609	-0.108412	0.114434	0.390436	0.40845	2.50527	0.33032	putative ATP-binding protein YghT
rhaB	1.06705	0.0936238	0.114872	0.390768	0.408081	1.80536	0.325198	rhamnulokinase
rzpD	0.819074	-0.287935	0.114709	0.390768	0.408081	23.1172	0.35128	DLP12 prophage; putative prophage endopeptidase RzpD
slyA	1.11447	0.156361	0.114686	0.390768	0.408081	931.23	0.105734	DNA-binding transcriptional dual regulator SlyA
ybbW	1.06705	0.0936238	0.114872	0.390768	0.408081	1.80536	0.325198	putative allantoin transporter
rpsL	0.919614	-0.120899	0.114969	0.390808	0.408036	6343.53	0.0795348	30S ribosomal subunit protein S12
renD	0.817266	-0.291122	0.115167	0.390903	0.407931	40.0412	0.297508	DLP12 prophage; protein RenD
ygdQ	0.878654	-0.186633	0.115155	0.390903	0.407931	334.625	0.131108	PF03741 family inner membrane protein YgdQ
rhaS	1.14522	0.195629	0.115635	0.392201	0.406491	7.59909	0.366809	DNA-binding transcriptional activator RhaS
rplD	0.913443	-0.130614	0.115919	0.392876	0.405744	11643	0.0868099	50S ribosomal subunit protein L4
livM	1.22204	0.289295	0.116752	0.394779	0.403646	25.2299	0.337487	branched chain amino acid/phenylalanine ABC transporter membrane subunit LivM
mdtL	0.819321	-0.2875	0.116727	0.394779	0.403646	48.9618	0.284188	efflux pump MdtL
nrfD	0.954637	-0.0669759	0.116582	0.394779	0.403646	1.07997	0.317929	putative menaquinol-cytochrome <i>c</i> reductase subunit NrfD
yhdT	0.817404	-0.290879	0.116825	0.394779	0.403646	31.8684	0.321799	DUF997 domain-containing protein YhdT
proM	0.900374	-0.151404	0.117136	0.395015	0.403387	304659	0.105523	tRNA-Pro(UGG)
sgbE	0.872374	-0.196981	0.117153	0.395015	0.403387	8.19158	0.36637	L-ribulose-5-phosphate 4-epimerase SgbE
yraK	0.816855	-0.291848	0.117067	0.395015	0.403387	30.999	0.329965	putative fimbrial adhesin YraK
sufD	1.22431	0.291969	0.117391	0.395526	0.402825	44.9511	0.313484	Fe-S cluster scaffold complex subunit SufD
yrfG	0.866103	-0.20739	0.11753	0.395703	0.40263	222.986	0.151876	purine nucleotidase
mrcB	1.13986	0.188854	0.118002	0.396523	0.401732	288.454	0.134265	PBP1B&gamma; // peptidoglycan glycosyltransferase / peptidoglycan DD-transpeptidase MrcB
och5	1.20326	0.266943	0.117947	0.396523	0.401732	71.2438	0.231489	small regulatory RNA Och5
yfiP	0.863167	-0.212288	0.118032	0.396523	0.401732	184.836	0.157229
ccmG	1.18771	0.248183	0.118923	0.399224	0.398783	13.7848	0.375958	thiol:disulfide oxidoreductase CcmG
serV	1.10284	0.141229	0.119352	0.40037	0.397539	316144	0.0954367	tRNA-Ser(GCU)
dicA	1.11856	0.161641	0.119519	0.400429	0.397474	659.866	0.111597	DNA-binding transcriptional dual regulator DicA
lysS	0.904435	-0.144911	0.119593	0.400429	0.397474	1184.84	0.0985044	lysine&mdash;tRNA ligase
yiaV	0.887977	-0.171406	0.119631	0.400429	0.397474	6.86898	0.354623	putative membrane fusion protein YiaV
ymgD	0.819626	-0.286963	0.120499	0.403038	0.394653	35.084	0.302612	PF16456 family protein YmgD
fadK	1.15499	0.207876	0.120774	0.403371	0.394295	7.92419	0.369	short chain acyl-CoA synthetase
yciY	1.10321	0.141702	0.120728	0.403371	0.394295	1046.57	0.0962574	uncharacterized protein YciY
asnV	0.90584	-0.142671	0.121512	0.404073	0.39354	479421	0.0974476	tRNA-Asn(GUU)
basR	0.820832	-0.284841	0.121329	0.404073	0.39354	38.1888	0.291792	DNA-binding transcriptional dual regulator BasR-phosphorylated // DNA-binding transcriptional dual regulator BasR
dacC	1.19497	0.25697	0.121267	0.404073	0.39354	92.853	0.216104	D-alanyl-D-alanine carboxypeptidase DacC
mprA	0.895183	-0.159745	0.121397	0.404073	0.39354	684.245	0.110942	DNA-binding transcriptional regulator MprA
nadC	1.13019	0.176561	0.121227	0.404073	0.39354	413.011	0.124686	quinolinate phosphoribosyltransferase (decarboxylating)
yncG	1.19328	0.25493	0.121435	0.404073	0.39354	13.7355	0.372049	putative glutathione <i>S</i>-transferase YncG
yqeF	1.19245	0.253926	0.121747	0.404559	0.393018	84.4715	0.21325	putative acyltransferase
panD	1.11515	0.157232	0.122175	0.405688	0.391808	564.86	0.109085	PanD &beta; cleavage product // PanD &alpha; cleavage product // aspartate 1-decarboxylase proenzyme
ftp	0.853815	-0.228004	0.122704	0.407152	0.390244	212.696	0.177799	FAD:protein FMN transferase
nikB	1.15982	0.213904	0.122923	0.407581	0.389786	9.57084	0.370038	Ni(2+) ABC transporter membrane subunit NikB
dauA	1.17166	0.228548	0.12317	0.408108	0.389225	125.367	0.178651	aerobic C4-dicarboxylate transporter DauA
waaJ	0.893336	-0.162725	0.123915	0.410277	0.386923	535.326	0.114488	UDP-glucose:(glucosyl)LPS &alpha;-1,2-glucosyltransferase
hyaE	1.06013	0.0842401	0.124168	0.410821	0.386348	1.96815	0.321926	putative HyaA chaperone
ftnA	1.1197	0.163117	0.124646	0.411512	0.385618	560.721	0.114638	ferritin iron storage protein
rsmF	0.844366	-0.24406	0.124479	0.411512	0.385618	126.925	0.201921	16S rRNA m<sup>5</sup>C1407 methyltransferase
yfdP	0.822272	-0.282313	0.124572	0.411512	0.385618	33.7525	0.321053	CPS-53 (KpLE1) prophage; uncharacterized protein YfdP
csrD	0.879388	-0.185429	0.124751	0.411561	0.385566	342.351	0.134445	regulator of CsrB and CsrC decay
wcaC	0.955828	-0.0651776	0.125246	0.412897	0.384158	1.04001	0.317402	colanic acid biosynthesis galactosyltransferase WcaC
helD	1.16137	0.21583	0.125394	0.413088	0.383957	168.242	0.165989	DNA helicase IV
srlA	0.830022	-0.268779	0.125707	0.413822	0.383186	56.8367	0.248508	sorbitol-specific PTS enzyme IIC<sub>2</sub> component
purE	0.830437	-0.268057	0.125838	0.413956	0.383046	63.3468	0.248	<i>N<sup>5</sup></i>-carboxyaminoimidazole ribonucleotide mutase
entA	1.21578	0.281881	0.126019	0.41396	0.383041	31.6816	0.308176	2,3-dihydro-2,3-dihydroxybenzoate dehydrogenase
ppsA	1.20196	0.265384	0.125962	0.41396	0.383041	64.5553	0.241193	phosphoenolpyruvate synthetase
ydfI	1.21098	0.276178	0.127006	0.416606	0.380274	24.7063	0.337599	putative oxidoreductase YdfI
yjbT	1.10565	0.144899	0.126936	0.416606	0.380274	4.86945	0.342637	PF17089 family protein YjbT
ygcS	1.11542	0.157587	0.127125	0.416698	0.380179	5.08122	0.347628	putative transporter YgcS
cytR	1.17181	0.228742	0.127786	0.417243	0.379611	130.403	0.182811	DNA-binding transcriptional repressor CytR
dgcT	1.19825	0.260934	0.127508	0.417243	0.379611	84.3931	0.234299	probable diguanylate cyclase DgcT
insL-3	0.852068	-0.230959	0.127837	0.417243	0.379611	165.578	0.18653
kdsD	1.12951	0.175694	0.127643	0.417243	0.379611	320.69	0.12656	D-arabinose 5-phosphate isomerase KdsD
phoE	0.828964	-0.270619	0.127796	0.417243	0.379611	23.8342	0.344025	outer membrane porin PhoE
yceH	1.21074	0.275895	0.127777	0.417243	0.379611	40.404	0.276327	DUF480 domain-containing protein YceH
yhdV	0.846628	-0.240199	0.128026	0.417563	0.379278	15.954	0.367478	lipoprotein YhdV
ycjM	0.842539	-0.247185	0.128134	0.41762	0.379219	17.1474	0.367933	glucosylglycerate phosphorylase
nusB	0.887494	-0.17219	0.128751	0.418767	0.378028	550.561	0.124309	transcription antitermination protein NusB
ygdH	1.13365	0.180975	0.12876	0.418767	0.378028	307.185	0.131849
ysdE	0.874113	-0.194109	0.128749	0.418767	0.378028	10.3279	0.3611	protein YsdE
wzc	0.930986	-0.103168	0.128876	0.418846	0.377946	2.55843	0.327278	protein-tyrosine kinase Wzc
racC	0.931132	-0.102942	0.129318	0.419985	0.376766	2.5535	0.327185	Rac prophage; protein RacC
era	0.903284	-0.146748	0.130739	0.4237	0.372941	830.323	0.103349	30S ribosomal subunit maturation GTPase Era
yhfT	1.17696	0.235064	0.13067	0.4237	0.372941	11.7162	0.367789	uncharacterized protein YhfT
yphA	0.86387	-0.211114	0.130621	0.4237	0.372941	10.21	0.365533	putative inner membrane protein
rplO	0.922334	-0.116639	0.130925	0.424004	0.37263	5825.65	0.0804552	50S ribosomal subunit protein L15
yafZ	1.06683	0.0933315	0.131263	0.424799	0.371817	2.3433	0.324237	CP4-6 prophage; DUF932 domain-containing protein YafZ
putP	1.18451	0.24429	0.13147	0.425139	0.371469	95.4231	0.208284	proline:Na<sup>+</sup> symporter
tamB	1.11337	0.154937	0.131575	0.425139	0.371469	654.124	0.110258	translocation and assembly module subunit TamB
ydgK	0.88737	-0.172393	0.131646	0.425139	0.371469	373.509	0.125541	DUF2569 domain-containing inner membrane protein YdgK
yadX	0.827165	-0.273752	0.132007	0.426004	0.370586	29.1097	0.318814	protein YadX
yjgA	0.901234	-0.150027	0.13333	0.429972	0.36656	598.09	0.106893	putative ribosome biogenesis factor YjgA
mrdB	0.891311	-0.165998	0.134212	0.432513	0.364001	631.278	0.120956	peptidoglycan glycosyltransferase MrdB
opgG	0.892913	-0.163409	0.134349	0.43265	0.363864	412.834	0.118593	osmoregulated periplasmic glucans biosynthesis protein G
lepA	0.908468	-0.138492	0.134694	0.433459	0.363052	916.132	0.0982144	30S ribosomal subunit biogenesis factor LepA
torR	1.18014	0.238952	0.135684	0.435636	0.360877	16.5623	0.363149	DNA-binding transcriptional dual regulator TorR
yeaK	1.15392	0.206549	0.13575	0.435636	0.360877	178.346	0.161203	mischarged aminoacyl-tRNA deacylase
ygcP	0.840727	-0.25029	0.135581	0.435636	0.360877	15.7151	0.357261	putative anti-terminator regulatory protein
yqiK	0.82877	-0.270957	0.135735	0.435636	0.360877	40.1094	0.29844	flotillin family inner membrane protein YqiK
agp	1.20538	0.269485	0.135992	0.435744	0.360768	42.2237	0.276491	glucose-1-phosphatase
dedA	1.13348	0.180756	0.136069	0.435744	0.360768	273.488	0.134712	DedA family protein DedA
ulaD	0.896768	-0.157193	0.136029	0.435744	0.360768	5.10309	0.346465	3-keto-L-gulonate-6-phosphate decarboxylase UlaD
atpG	1.09181	0.126717	0.136749	0.437617	0.358906	1955.46	0.0890205	ATP synthase F<sub>1</sub> complex subunit &gamma;
ddlB	1.12619	0.17145	0.136916	0.437845	0.35868	408.925	0.126506	D-alanine&mdash;D-alanine ligase B
rseX	0.951736	-0.0713671	0.137037	0.437927	0.358598	1.82647	0.31802	small regulatory RNA RseX
slmA	0.873761	-0.194689	0.137214	0.438187	0.35834	261.607	0.149935	nucleoid occlusion factor SlmA
ybeF	0.837195	-0.256364	0.137939	0.439889	0.356657	61.0579	0.242289	putative DNA-binding transcriptional regulator YbeF
ydgD	1.20317	0.266846	0.137897	0.439889	0.356657	56.2816	0.272426	putative serine protease YdgD
dnaC	0.84434	-0.244105	0.138138	0.440199	0.356351	98.7525	0.216037	DNA replication protein DnaC
ydfE	0.893726	-0.162096	0.138228	0.440199	0.356351	5.81299	0.347514	Qin prophage; protein YdfE
ampD	1.17978	0.238517	0.138509	0.440271	0.35628	96.3778	0.206766	1,6-anhydro-<i>N</i>-acetylmuramoyl-L-alanine amidase
ybcV	0.926497	-0.110142	0.138459	0.440271	0.35628	2.90163	0.329416	DLP12 prophage; DUF1398 domain-containing protein YbcV
ythA	0.946851	-0.0787906	0.138538	0.440271	0.35628	1.60699	0.319684	KpLE2 phage-like element; uncharacterized protein YthA
kdgR	0.880142	-0.184192	0.138702	0.440486	0.356068	259.658	0.140036	DNA-binding transcriptional repressor KdgR
yaiO	0.833087	-0.263461	0.138827	0.440578	0.355977	45.8056	0.267682	outer membrane protein YaiO
yhbT	1.18798	0.248508	0.138997	0.440813	0.355746	77.3007	0.22509
fdrA	0.961002	-0.0573883	0.139721	0.4426	0.353989	1.11992	0.31561	putative oxamate carbamoyltransferase FdrA
wbbI	1.0956	0.131717	0.139753	0.4426	0.353989	1224.38	0.0937449	&beta;-1,6-galactofuranosyltransferase WbbI
dmsA	1.19918	0.262053	0.140056	0.442643	0.353947	30.4907	0.330644	dimethyl sulfoxide reductase subunit A
G0-10698	1.20162	0.264987	0.139934	0.442643	0.353947	27.8307	0.322353
rsxE	0.865302	-0.208725	0.139965	0.442643	0.353947	259.071	0.166901	SoxR [2Fe-2S] reducing system protein RsxE
rsxA	0.883974	-0.177924	0.140435	0.443067	0.353531	284.079	0.134398	SoxR [2Fe-2S] reducing system protein RsxA
ydfG	1.11878	0.161921	0.140472	0.443067	0.353531	418.893	0.119302	3-hydroxy acid dehydrogenase YdfG
yheS	0.890386	-0.167498	0.14048	0.443067	0.353531	353.956	0.124616	putative ATP-binding protein YheS
blr	0.876173	-0.190712	0.140751	0.443618	0.352991	212.103	0.147347	&beta;-lactam resistance protein
mdlA	0.870741	-0.199685	0.140998	0.444091	0.352528	216.919	0.157073	ABC transporter family protein MdlA
potA	0.892848	-0.163513	0.141287	0.444696	0.351937	839.663	0.121072	spermidine preferential ABC transporter ATP binding subunit
cyoA	0.917453	-0.124295	0.14172	0.445142	0.351502	4162.44	0.0885205	cytochrome <i>bo</i><sub>3</sub> subunit 2
otsB	1.1254	0.170432	0.141691	0.445142	0.351502	7.27253	0.34972	trehalose-6-phosphate phosphatase
valX	1.08476	0.117382	0.141645	0.445142	0.351502	584611	0.082936	tRNA-Val(UAC)
aphA	1.16376	0.218789	0.142299	0.44635	0.350325	122.671	0.180918	acid phosphatase / phosphotransferase
bamD	0.919715	-0.120741	0.142298	0.44635	0.350325	2327.43	0.0859186	outer membrane protein assembly factor BamD
ulaF	1.11249	0.153799	0.142448	0.446512	0.350167	5.40863	0.344268	L-ribulose-5-phosphate 4-epimerase UlaF
hicB	1.20132	0.264626	0.1433	0.446753	0.349933	60.383	0.280637	antitoxin of the HicA-HicB toxin-antitoxin system / DNA-binding transcriptional repressor HicB
hslR	0.834179	-0.261571	0.143009	0.446753	0.349933	49.3642	0.268046	heat shock protein Hsp15
hspQ	0.860908	-0.216068	0.143252	0.446753	0.349933	169.197	0.178449	heat shock protein HspQ
paaK	1.17988	0.238644	0.142993	0.446753	0.349933	15.3452	0.354686	phenylacetate-CoA ligase
pyrE	0.835931	-0.258545	0.143301	0.446753	0.349933	52.0752	0.258987	orotate phosphoribosyltransferase
trpC	1.16247	0.217196	0.142926	0.446753	0.349933	141.199	0.17966	fused indole-3-glycerol phosphate synthase/phosphoribosylanthranilate isomerase
ydhQ	1.15191	0.204028	0.143401	0.446753	0.349933	177.382	0.163	putative adhesin-related protein YdhQ
yjiX	1.20095	0.264176	0.143355	0.446753	0.349933	44.6877	0.283134	PF04328 family protein YjiX
yqcA	1.18362	0.243207	0.142866	0.446753	0.349933	80.3444	0.219221	putative flavodoxin YqcA
mgtT	1.13049	0.176954	0.143589	0.447034	0.349659	489.606	0.134509	protein MgtT
kgtP	1.10835	0.148416	0.143817	0.447116	0.34958	4109.65	0.109276	&alpha;-ketoglutarate:H<sup>+</sup> symporter
panC	1.14816	0.19933	0.143907	0.447116	0.34958	177.768	0.158155	pantothenate synthetase
rplW	0.916912	-0.125145	0.143898	0.447116	0.34958	7497.22	0.0896134	50S ribosomal subunit protein L23
emrY	0.851208	-0.232416	0.144118	0.447469	0.349237	16.3572	0.355774	tripartite efflux pump membrane subunit EmrY
hyfC	1.05955	0.0834579	0.144687	0.448325	0.348407	1.93508	0.320653	hydrogenase 4 component C
mscK	0.90796	-0.1393	0.144672	0.448325	0.348407	751.111	0.10138	potassium dependent, small conductance mechanosensitive channel
ypdB	1.16737	0.223266	0.144657	0.448325	0.348407	112.727	0.188528
opgH	0.903229	-0.146837	0.144827	0.448431	0.348305	604.477	0.107836	osmoregulated periplasmic glucans biosynthesis protein H
pldB	0.880515	-0.183581	0.144917	0.448431	0.348305	278.312	0.142392	lysophospholipase L2
rrfD	0.880345	-0.18386	0.145143	0.448828	0.347921	539.65	0.140854	5S ribosomal RNA
ycfK	1.09016	0.124537	0.145278	0.448943	0.347809	3.56963	0.333669	e14 prophage; protein StfP
fadI	1.19616	0.258405	0.146189	0.451453	0.345387	28.9097	0.325651	3-ketoacyl-CoA thiolase FadI
menE	1.18862	0.249286	0.146775	0.452958	0.343942	72.4494	0.23725	<i>o</i>-succinylbenzoate&mdash;CoA ligase
holB	0.861632	-0.214857	0.146877	0.452969	0.343932	131.671	0.179205	DNA polymerase III subunit &delta;'
bamB	1.12005	0.16356	0.146979	0.452981	0.34392	851.069	0.123066	outer membrane protein assembly factor BamB
alr	1.12918	0.175276	0.147254	0.453523	0.343401	334.121	0.134389	alanine racemase 1
rnlB	1.10781	0.147707	0.147533	0.453773	0.343161	588.639	0.109358	CP4-57 prophage; antitoxin RnlB
rybB	1.18535	0.245311	0.147497	0.453773	0.343161	1128.8	0.34478	small regulatory RNA RybB
ygeM	0.888668	-0.170284	0.147766	0.454185	0.342767	7.59951	0.348913
sufA	1.17272	0.22986	0.148143	0.45504	0.34195	20.3573	0.355033	iron-sulfur cluster insertion protein SufA
frdC	1.19097	0.252141	0.148251	0.455067	0.341925	22.213	0.33303	fumarate reductase membrane protein FrdC
alsB	1.15114	0.203064	0.148895	0.455968	0.341066	9.63704	0.356047	D-allose ABC transporter periplasmic binding protein
tdcB	0.917503	-0.124215	0.148869	0.455968	0.341066	5.1408	0.332733	catabolic threonine dehydratase
yncL	1.19705	0.25948	0.148942	0.455968	0.341066	30.0585	0.303908	uncharacterized protein YncL
yodB	0.885603	-0.175268	0.148718	0.455968	0.341066	8.40957	0.349313	putative cytochrome b561 YodB
sppA	1.13326	0.180477	0.14962	0.457739	0.339382	251.447	0.140773	protease IV, a signal peptide peptidase
yhbO	1.05821	0.0816219	0.149724	0.457752	0.33937	1.64115	0.320462	protein/nucleic acid deglycase 2
frlB	1.12797	0.173725	0.151048	0.46054	0.336733	8.62604	0.347966	fructoselysine 6-phosphate deglycase
uhpC	1.19483	0.2568	0.151	0.46054	0.336733	41.6917	0.278252	UhpC-glucose-6-P // inner membrane protein sensing glucose-6-phosphate
yagA	1.07693	0.106923	0.151014	0.46054	0.336733	2.96029	0.327318	CP4-6 prophage; integrase core domain-containing protein YagA
yfbR	1.17322	0.230474	0.151138	0.46054	0.336733	111.292	0.205053	dCMP phosphohydrolase
ynfC	1.16199	0.216594	0.15101	0.46054	0.336733	117.321	0.18455	PF06788 family lipoprotein YnfC
ada	1.18655	0.246775	0.151462	0.46057	0.336705	73.4568	0.241239	DNA-binding transcriptional dual regulator / DNA repair protein Ada
entC	1.13471	0.182329	0.151549	0.46057	0.336705	243.665	0.143532	isochorismate synthase EntC
pncA	1.16072	0.215025	0.151474	0.46057	0.336705	117.879	0.182238	nicotinamidase
yccJ	1.15951	0.213519	0.151539	0.46057	0.336705	12.5949	0.354332	PF13993 family protein YccJ
ydcR	0.86831	-0.203717	0.151732	0.460818	0.33647	159.575	0.168202	fused putative DNA-binding transcriptional regulator/putative aminotransferase YdcR
mug	1.19021	0.251216	0.152075	0.461252	0.336062	52.9487	0.256689	stationary phase mismatch/uracil DNA glycosylase
yjiP	0.893942	-0.161747	0.152059	0.461252	0.336062	6.21171	0.344637
rhtB	0.848404	-0.237176	0.152342	0.461754	0.335589	18.8619	0.345081	L-homoserine/L-homoserine lactone/L-threonine exporter
tnaC	0.938227	-0.0919918	0.1526	0.461935	0.335419	2.33283	0.323034	<i>tnaAB</i> operon leader peptide
yehC	1.05658	0.0793976	0.152603	0.461935	0.335419	1.65667	0.319815	putative fimbrial chaperone YehC
yncM	1.14544	0.195906	0.152847	0.462371	0.33501	9.18927	0.35294
nudJ	1.19191	0.253275	0.153017	0.462509	0.33488	48.103	0.263567	phosphatase NudJ
ynfL	1.13783	0.186284	0.153095	0.462509	0.33488	9.80227	0.351181	putative DNA-binding transcriptional regulator YnfL
trmH	0.894282	-0.161198	0.153379	0.462951	0.334465	655.617	0.12385	tRNA (Gm18) 2'-O-methyltransferase
ydeM	0.895472	-0.15928	0.153443	0.462951	0.334465	6.29961	0.343522	putative anaerobic sulfatase maturation enzyme YdeM
uspA	1.09905	0.136261	0.154142	0.464756	0.332775	1726.01	0.101359	universal stress protein A
acrB	0.913419	-0.130651	0.154687	0.466091	0.331529	1269.9	0.0970596	multidrug efflux pump RND permease AcrB
insC-6	0.842299	-0.247595	0.155066	0.46666	0.331	22.0604	0.328066
norR	1.14715	0.198059	0.155079	0.46666	0.331	90.9096	0.352622	DNA-binding transcriptional dual regulator NorR
yfdX	0.879936	-0.18453	0.155517	0.467673	0.330058	9.84623	0.350542	protein YfdX
cobB	1.18027	0.239112	0.156397	0.468917	0.328904	70.3393	0.229302	CobB-S // protein-lysine deacetylase/desuccinylase/delipoylase
dmsB	0.917866	-0.123644	0.156646	0.468917	0.328904	3.86146	0.332362	dimethyl sulfoxide reductase subunit B
eutS	1.03483	0.0493938	0.156513	0.468917	0.328904	0.837848	0.313951	putative ethanolamine catabolic microcompartment shell protein EutS
glnS	0.915361	-0.127587	0.156257	0.468917	0.328904	971.798	0.0948152	glutamine&mdash;tRNA ligase
glrK	0.878601	-0.18672	0.15662	0.468917	0.328904	208.79	0.150909	GlrK-<i>N</i>-phospho-L-histidine // histidine kinase GlrK
wcaF	1.03483	0.0493938	0.156513	0.468917	0.328904	0.837848	0.313951	colanic acid biosynthesis acetyltransferase WcaF
yphF	1.08266	0.114579	0.156545	0.468917	0.328904	3.18932	0.329377	putative ABC transporter periplasmic binding protein YphF
alsA	0.938453	-0.0916437	0.156877	0.468996	0.328831	2.24281	0.322836	D-allose ABC transporter ATP binding subunit
greA	0.904731	-0.144439	0.156873	0.468996	0.328831	670.418	0.109426	transcription elongation factor GreA
pgpA	1.12133	0.165214	0.157267	0.46955	0.328318	304.811	0.128719	phosphatidylglycerophosphatase A
ybaQ	1.11804	0.160977	0.157206	0.46955	0.328318	445.56	0.124214	DNA-binding transcriptional regulator YbaQ
lpp	1.09393	0.129518	0.157507	0.469655	0.328221	41320.1	0.0965485	murein lipoprotein
purU	0.903308	-0.14671	0.15743	0.469655	0.328221	619.415	0.111672	formyltetrahydrofolate deformylase
ligA	0.879332	-0.18552	0.158079	0.471055	0.326928	207.205	0.15042	DNA ligase
yfcE	0.878707	-0.186546	0.158587	0.472261	0.325818	207.763	0.152002	phosphodiesterase YfcE
cysK	1.13877	0.187472	0.159858	0.47507	0.323242	236.18	0.153313	cysteine synthase A
fepD	1.11364	0.155287	0.159879	0.47507	0.323242	882.729	0.120278	ferric enterobactin ABC transporter membrane subunit FebD
speD	0.898559	-0.154315	0.15968	0.47507	0.323242	535.701	0.119328	<i>S</i>-adenosylmethionine decarboxylase proenzyme // &beta; cleavage product of SpeD // &alpha; cleavage product of SpeD
yrfF	1.11981	0.163253	0.159944	0.47507	0.323242	332.283	0.12771
gntX	0.887081	-0.172863	0.160841	0.47681	0.321655	258.258	0.138208
rpmJ	0.922197	-0.116854	0.160839	0.47681	0.321655	3696.72	0.0870743	50S ribosomal subunit protein L36
ydaF	0.843685	-0.245223	0.160741	0.47681	0.321655	27.8058	0.318929	Rac prophage; DUF1391 domain-containing protein YdaF
aaeR	1.1622	0.216857	0.161068	0.476963	0.321515	133.331	0.193266	DNA-binding transcriptional activator AaeR
queF	0.878847	-0.186317	0.161101	0.476963	0.321515	278.069	0.153173	7-cyano-7-deazaguanine reductase
yfeZ	1.18495	0.244828	0.161304	0.477112	0.32138	50.0763	0.253849	putative inner membrane protein
zur		-0.135757	0.161359	0.477112	0.32138	733.814	0.103173	DNA-binding transcriptional repressor Zur
luxS	0.903084	-0.147067	0.161615	0.477254	0.32125	587.185	0.11338	<i>S</i>-ribosylhomocysteine lyase
ybdG	0.880457	-0.183676	0.161547	0.477254	0.32125	245.811	0.150105	miniconductance mechanosensitive channel YbdG
dnaA	0.913875	-0.129931	0.161966	0.47795	0.320618	1211.31	0.0983047	chromosomal replication initiator protein DnaA
yieK	0.878358	-0.18712	0.162059	0.47795	0.320618	10.7372	0.347487	putative glucosamine-6-phosphate deaminase YieK
yjbD	0.878425	-0.187009	0.162656	0.4794	0.319302	224.099	0.154593	DUF3811 domain-containing protein YjbD
gspE	0.858358	-0.220349	0.163139	0.480517	0.318292	15.5142	0.344755	type II secretion system protein GspE
yciN	1.09496	0.130878	0.163463	0.481163	0.317707	852.679	0.0993051	protein YciN
ypeA	1.17057	0.227207	0.163582	0.481204	0.317671	89.7224	0.214222	putative acetyltransferase YpeA
yggF	1.18681	0.247091	0.163781	0.481481	0.317421	36.1174	0.277356	fructose 1,6-bisphosphatase YggF
yafW	1.08398	0.116338	0.164015	0.48186	0.317079	3.55729	0.329316	antitoxin of the YkfI-YafW toxin-antitoxin pair
artQ	1.18609	0.246215	0.164849	0.483383	0.315709	41.1602	0.280492	L-arginine ABC transporter membrane subunit ArtQ
gltS	1.16091	0.215252	0.164754	0.483383	0.315709	103.816	0.193384	glutamate:sodium symporter
priA	0.864376	-0.21027	0.164642	0.483383	0.315709	134.447	0.186082	primosomal protein N'
nudG	1.17475	0.232355	0.164998	0.48351	0.315595	21.1478	0.332054	5-hydroxy-CTP diphosphatase
intZ	1.12621	0.171477	0.165179	0.48373	0.315397	381.702	0.138468	CPZ-55 prophage; putative phage integrase IntZ
epd	1.08981	0.124076	0.16542	0.483819	0.315317	1541.8	0.0940008	D-erythrose-4-phosphate dehydrogenase
folK	0.881891	-0.181328	0.165365	0.483819	0.315317	211.04	0.149432	2-amino-4-hydroxy-6-hydroxymethyldihydropteridine diphosphokinase
eutP	1.04169	0.0589272	0.165885	0.484254	0.314927	1.23686	0.314817	putative ethanolamine utilization acetate kinase EutP
pspB	0.846902	-0.239733	0.165855	0.484254	0.314927	34.0112	0.323053	phage shock protein B
yeiH	1.16401	0.219106	0.165799	0.484254	0.314927	105.273	0.201105	PF03601 family inner membrane protein YeiH
phnM	0.942883	-0.0848486	0.166193	0.484537	0.314673	2.34363	0.320586	RPnTP hydrolase
ykiD	1.15252	0.20479	0.166118	0.484537	0.314673	12.8923	0.346721	protein YkiD
pheA	1.11626	0.158677	0.16654	0.484625	0.314594	446.756	0.125439	fused chorismate mutase/prephenate dehydratase
psiE	1.17841	0.236842	0.166401	0.484625	0.314594	59.3946	0.241479	putative phosphate starvation-inducible protein PsiE
ylcI	1.05176	0.0728107	0.166482	0.484625	0.314594	1.74187	0.317834	DLP12 prophage; DUF3950 domain-containing protein YlcI
chiZ	1.18405	0.243728	0.166949	0.485259	0.314027	33.291	0.307106
tsaE	0.845528	-0.242076	0.16697	0.485259	0.314027	43.2949	0.261717	N<sup>6</sup>-L-threonylcarbamoyladenine synthase, TsaE subunit
nlpE	1.17225	0.229278	0.16749	0.486462	0.312951	76.063	0.222275	sensor lipoprotein NlpE
lpxL	1.1465	0.197233	0.167631	0.486565	0.31286	134.791	0.169528	lauroyl acyltransferase
glyT	1.07841	0.108908	0.168039	0.48744	0.312079	214541	0.0820535	tRNA-Gly(UCC)
ycdU	0.877984	-0.187734	0.169011	0.489949	0.309849	9.64772	0.346035	uncharacterized protein YcdU
frmB	0.857461	-0.221857	0.169283	0.490429	0.309424	81.9514	0.209752	<i>S</i>-formylglutathione hydrolase FrmB
panF	0.861525	-0.215036	0.169448	0.490596	0.309276	118.968	0.198461	pantothenate:Na+ symporter
fldA	0.919469	-0.121128	0.169763	0.4912	0.308742	1255.1	0.0927436	oxidized flavodoxin 1 // flavodoxin 1
ccmC	0.855829	-0.224606	0.170494	0.492977	0.307173	18.2941	0.333926	cytochrome <i>c</i> maturation protein C
micA	0.902761	-0.147583	0.170592	0.492977	0.307173	6254.6	0.113207	small regulatory RNA MicA
ycaQ	1.15769	0.211251	0.170822	0.49333	0.306862	122.632	0.191567	interstrand DNA crosslink repair glycosylase
ynjB	1.17196	0.228927	0.171021	0.493594	0.30663	21.1319	0.329111	putative ABC transporter periplasmic binding protein YnjB
tdk	0.865619	-0.208195	0.171304	0.494101	0.306184	192.143	0.189029	thymidine/deoxyuridine kinase
apaG	1.13064	0.177144	0.171429	0.494151	0.30614	303.972	0.147212	DUF525 domain-containing protein ApaG
prs	0.910926	-0.134595	0.171644	0.49446	0.305869	886.114	0.104981	ribose-phosphate diphosphokinase
metY	1.08151	0.113053	0.171925	0.494756	0.305609	84052.2	0.0915307	tRNA-initiator Met(CAU)
pdeN	1.11066	0.15142	0.171962	0.494756	0.305609	400.597	0.120441	putative c-di-GMP phosphodiesterase PdeN
gspF	1.15699	0.210377	0.172395	0.49538	0.305061	13.262	0.341866	type II secretion system protein GspF
yfiS	1.11239	0.153659	0.172331	0.49538	0.305061	5.80251	0.338898	protein YfiS
pldA	0.884005	-0.177874	0.17318	0.497011	0.303634	248.871	0.149308	outer membrane phospholipase A
yigB	1.16711	0.222945	0.173088	0.497011	0.303634	77.5114	0.215506	5-amino-6-(5-phospho-D-ribitylamino)uracil phosphatase
ybhI	0.94108	-0.087611	0.173803	0.49849	0.302344	3.0013	0.321041	putative tricarboxylate transporter
argT	1.13568	0.183555	0.174089	0.498836	0.302042	194.355	0.156033	lysine/arginine/ornithine ABC transporter periplasmic binding protein
eutC	1.15358	0.206115	0.174141	0.498836	0.302042	12.8451	0.341986	ethanolamine ammonia-lyase subunit &beta;
fdhF	1.18008	0.23888	0.174562	0.499197	0.301728	34.2191	0.29858	formate dehydrogenase H
sufB	1.17941	0.238069	0.17442	0.499197	0.301728	63.4062	0.259122	Fe-S cluster scaffold complex subunit SufB
yigZ	1.16903	0.225316	0.174594	0.499197	0.301728	94.7691	0.223116	IMPACT family member YigZ
narP	0.877246	-0.188947	0.1755	0.501164	0.30002	155.275	0.163926	DNA-binding transcriptional dual regulator NarP-phosphorylated // DNA-binding transcriptional dual regulator NarP
yjgL	0.855792	-0.224668	0.175456	0.501164	0.30002	72.2303	0.222592	protein YjgL
abgR	1.1676	0.223547	0.175824	0.501776	0.29949	22.597	0.330953	putative LysR-type DNA-binding transcriptional regulator AbgR
yeiS	0.848382	-0.237214	0.176024	0.502034	0.299267	41.0604	0.284693	DUF2542 domain-containing protein YeiS
yfaD	1.17587	0.233733	0.176244	0.502038	0.299264	25.6845	0.310625
ygcR	1.05266	0.0740345	0.176168	0.502038	0.299264	1.63715	0.317785	putative flavoprotein
dpiA	1.17452	0.232072	0.176547	0.50259	0.298786	21.775	0.316518	DNA-binding transcriptional dual regulator DpiA-phosphorylated // DNA-binding transcriptional dual regulator DpiA
ycbJ	1.17397	0.231396	0.176808	0.50302	0.298415	53.4601	0.242261	putative phosphotransferase YcbJ
menA	0.856289	-0.223831	0.17741	0.504109	0.297475	72.5931	0.223976	1,4-dihydroxy-2-naphthoate octaprenyltransferase
yebK	1.15505	0.207954	0.177584	0.504109	0.297475	103.395	0.191816	DNA-binding transcriptional repressor YebK
yfbT	1.15858	0.212361	0.177504	0.504109	0.297475	95.642	0.199789
ymdF	0.871327	-0.198715	0.17763	0.504109	0.297475	12.736	0.341245	stress-induced bacterial acidophilic repeat motifs-containing protein YmdF
mzrA	1.12731	0.172881	0.178025	0.504606	0.297047	237.424	0.145334	modulator protein MzrA
waaG	0.893564	-0.162357	0.177936	0.504606	0.297047	309.024	0.134146	lipopolysaccharide glucosyltransferase I
pstS	1.17208	0.229072	0.178313	0.50511	0.296614	108.792	0.23817	phosphate ABC transporter periplasmic binding protein
evgA	0.9062	-0.142099	0.178665	0.505796	0.296024	675.826	0.114105	DNA-binding transcriptional activator EvgA-phosphorylated // DNA-binding transcriptional activator EvgA
ydjE	0.851881	-0.231276	0.179027	0.506507	0.295414	27.1607	0.312125	putative transporter YdjE
aceE	1.07236	0.100793	0.179514	0.506948	0.295037	10198.4	0.0774922	pyruvate dehydrogenase E1 component
narG	1.16582	0.221346	0.17945	0.506948	0.295037	22.7873	0.327767	nitrate reductase A subunit &alpha;
phr	1.17359	0.230928	0.179363	0.506948	0.295037	49.7233	0.246966	deoxyribodipyrimidine photolyase
iroK	1.0323	0.0458578	0.180116	0.508335	0.29385	0.778368	0.313239	protein IroK
yjcO	1.17276	0.229904	0.181051	0.51066	0.291868	50.8016	0.24604	Sel1 repeat-containing protein YjcO
ampC	0.854417	-0.226987	0.181437	0.511396	0.291243	58.2636	0.236949	&beta;-lactamase
yebS	1.12739	0.172989	0.181535	0.511396	0.291243	261.544	0.147311
yihL	1.1714	0.228237	0.181834	0.511923	0.290795	53.6924	0.24134	putative DNA-binding transcriptional regulator YihL
mdtI	1.1602	0.214377	0.182222	0.512546	0.290267	83.5474	0.208355	multidrug/spermidine efflux pump membrane subunit MdtI
yceI	1.17571	0.233533	0.182278	0.512546	0.290267	47.1344	0.265442	protein YceI
smf	1.13713	0.185397	0.182468	0.512766	0.290081	206.1	0.162854	protein Smf
mrr	1.15817	0.211851	0.183337	0.514892	0.288283	93.6369	0.204805	Type IV methyl-directed restriction enzyme EcoKMrr
ftsA	0.916627	-0.125593	0.183865	0.515427	0.287833	855.682	0.099622	cell division protein FtsA
lhr	1.17032	0.226905	0.183817	0.515427	0.287833	81.4879	0.239303	ATP-dependent helicase Lhr
yahC	0.945698	-0.0805482	0.183686	0.515427	0.287833	2.40172	0.318721	uncharacterized protein YahC
crcB	0.853457	-0.22861	0.184131	0.515617	0.287673	58.8538	0.24755	F<sup>-</sup> channel
ppdB	0.882162	-0.180885	0.184157	0.515617	0.287673	10.1182	0.339923	prepilin-type N-terminal cleavage/methylation domain-containing protein PpdB
ymbA	0.879442	-0.185339	0.184596	0.51653	0.286905	179.003	0.163971
napD	1.08809	0.121801	0.184726	0.516579	0.286864	5.14429	0.328973	NapA signal peptide-binding chaperone NapD
yohO	1.1237	0.16826	0.185004	0.517043	0.286473	366.046	0.143187	UPF0387 family protein YohO
csgG	0.852767	-0.229776	0.185286	0.517517	0.286076	31.8751	0.295195	curli secretion channel
dgoK	0.853603	-0.228363	0.185423	0.517583	0.28602	25.4115	0.307619	2-dehydro-3-deoxygalactonokinase
3'ETS-leuZ	0.851331	-0.232207	0.18651	0.517892	0.285761	19141	0.276252
csgF	0.963318	-0.053916	0.186534	0.517892	0.285761	0.86636	0.314542	curli assembly component CsgF
fucO	0.907497	-0.140035	0.185937	0.517892	0.285761	6.56644	0.333211	L-1,2-propanediol oxidoreductase
serS	1.09413	0.129778	0.186332	0.517892	0.285761	1617.38	0.104524	serine&mdash;tRNA ligase
sgcQ	0.885385	-0.175624	0.186549	0.517892	0.285761	9.82686	0.338825	KpLE2 phage-like element; putative nucleoside triphosphatase
yajR	1.14257	0.192286	0.186517	0.517892	0.285761	158.553	0.174298	putative transport protein YajR
ybiT	0.912276	-0.132458	0.186082	0.517892	0.285761	690.832	0.107236	putative ATP-binding protein YbiT
yfgM	1.12236	0.166538	0.186117	0.517892	0.285761	453.332	0.141563	ancillary SecYEG translocon subunit
yjdP	0.884928	-0.176368	0.186068	0.517892	0.285761	12.3223	0.338405	protein YjdP
insC-5	0.856585	-0.223331	0.187209	0.517939	0.285722	22.9327	0.313222
mtfA	1.16598	0.221545	0.186846	0.517939	0.285722	72.6034	0.231093	Mlc titration factor
pgrR	1.14166	0.191138	0.187141	0.517939	0.285722	155.466	0.173083	DNA-binding transcriptional repressor PgrR
ribF	1.10548	0.144672	0.187321	0.517939	0.285722	490.382	0.119067	bifunctional riboflavin kinase / FMN adenylyltransferase
sseB	0.892998	-0.163271	0.187356	0.517939	0.285722	256.204	0.138968	protein SseB
yadH	1.15844	0.212188	0.187034	0.517939	0.285722	81.4226	0.208097	putative ABC transporter membrane subunit YadH
ykiA	1.1659	0.221448	0.187026	0.517939	0.285722	67.3078	0.229884	DUF2773 domain-containing protein YkiA
hemH	0.866578	-0.206599	0.187521	0.518082	0.285602	102.56	0.198698	ferrochelatase
atpI	0.911902	-0.133049	0.187758	0.518218	0.285488	1146.82	0.108154	ATP synthase accessory factor AtpI
phnL	0.965454	-0.0507201	0.187909	0.518218	0.285488	0.930271	0.314017	methylphosphonate degradation complex subunit PhnL
yigL	1.15311	0.20553	0.187817	0.518218	0.285488	110.593	0.195934	phosphosugar phosphatase YigL
metQ	0.894525	-0.160807	0.188673	0.520011	0.283987	336.432	0.136954	L-methionine/D-methionine ABC transporter membrane anchored binding protein
eutR	0.869567	-0.201631	0.189315	0.52022	0.283813	15.3313	0.332356	putative DNA-binding transcriptional regulator EutR
nuoA	1.11065	0.151401	0.189228	0.52022	0.283813	460.291	0.125878	NADH:quinone oxidoreductase subunit A
soxR	0.857062	-0.222528	0.189135	0.52022	0.283813	26.1384	0.314067	DNA-binding transcriptional dual regulator SoxR
yjfF	1.16564	0.221123	0.189115	0.52022	0.283813	20.7274	0.317111	galactofuranose ABC transporter putative membrane subunit YjtF
yqcE	0.929313	-0.105764	0.189166	0.52022	0.283813	3.30513	0.324433	putative transport protein YqcE
insF-2	0.85343	-0.228655	0.190056	0.520608	0.28349	37.0859	0.279544
kptA	1.17226	0.229287	0.190137	0.520608	0.28349	36.5363	0.278617	RNA 2'-phosphotransferase
potG	0.930523	-0.103886	0.189936	0.520608	0.28349	3.16739	0.324192	putrescine ABC transporter ATP binding subunit
rdgB	0.859578	-0.218299	0.190009	0.520608	0.28349	77.9656	0.226375	dITP/XTP pyrophosphatase
ydjO	0.890153	-0.167875	0.189864	0.520608	0.28349	11.3564	0.337016	protein YdjO
ykgM	0.87323	-0.195567	0.190008	0.520608	0.28349	13.1209	0.334757	50S ribosomal subunit protein L31B
yeeR	0.877317	-0.18883	0.190268	0.520655	0.28345	14.206	0.337072	CP4-44 prophage; inner membrane protein YeeR
rutD	1.04743	0.0668533	0.190645	0.521376	0.282849	1.87819	0.315793	putative aminoacrylate hydrolase RutD
idnK	0.893923	-0.161778	0.190952	0.521595	0.282667	8.21681	0.336572	D-gluconate kinase, thermosensitive
yhgF	0.877618	-0.188335	0.1909	0.521595	0.282667	253.201	0.172646	putative RNA-binding protein YhgF
yncP	1.16903	0.225317	0.191645	0.523176	0.281352	27.3425	0.300991	protein YncP
yfiL	0.872024	-0.19756	0.191988	0.523802	0.280833	15.4855	0.333236	DUF2799 domain-containing lipoprotein YfiL
ycgM	1.14068	0.189897	0.19225	0.524204	0.280499	155.095	0.175074	putative isomerase/hydrolase
nei	1.17057	0.227208	0.192503	0.524271	0.280444	36.9888	0.27439	endonuclease VIII
yihX	1.1576	0.211142	0.192436	0.524271	0.280444	85.2444	0.211434	&alpha;-D-glucose-1-phosphate phosphatase YihX
abgA	0.944766	-0.0819709	0.192959	0.525202	0.279673	2.02333	0.31912	<i>p</i>-aminobenzoyl-glutamate hydrolase subunit A
dcm	0.883029	-0.179467	0.193731	0.52699	0.278198	195.587	0.161545	DNA-cytosine methyltransferase
amiD	1.17014	0.226676	0.194543	0.527237	0.277994	43.7282	0.27576	<i>N</i>-acetylmuramoyl-L-alanine amidase D
chbB	0.871085	-0.199114	0.194403	0.527237	0.277994	124.66	0.192143	<I>N,N'</I>-diacetylchitobiose-specific PTS enzyme IIB component
cysD	0.922737	-0.116008	0.194581	0.527237	0.277994	5.2023	0.326324	sulfate adenylyltransferase subunit 2
frvA	0.891359	-0.165922	0.194927	0.527237	0.277994	10.0612	0.335048	putative PTS enzyme IIA component FrvA
gltF	0.861836	-0.214515	0.194256	0.527237	0.277994	73.5164	0.223113	periplasmic protein GltF
waaO	0.907866	-0.139449	0.194971	0.527237	0.277994	467.215	0.116992	UDP-D-glucose:(glucosyl)LPS &alpha;-1,3-glucosyltransferase
yaeH	1.12274	0.167024	0.194858	0.527237	0.277994	231.947	0.14626	DUF3461 domain-containing protein YaeH
yhcD	0.878533	-0.186831	0.194078	0.527237	0.277994	150.345	0.171637	putative fimbrial usher protein YhcD
ypjD	0.881953	-0.181226	0.194505	0.527237	0.277994	191.362	0.164616	cytochrome <i>c</i> assembly family protein
yqiA	0.91254	-0.13204	0.194962	0.527237	0.277994	569.913	0.109195	esterase YqiA
ymfK	0.87958	-0.185114	0.195851	0.529305	0.276294	167.005	0.171047	e14 prophage; putative repressor protein YmfK
ruvA	1.13258	0.179618	0.19636	0.530368	0.275422	164.753	0.16332	Holliday junction branch migration complex subunit RuvA
rhsB	0.864884	-0.209422	0.196608	0.530725	0.27513	97.0616	0.213199	rhs element protein RhsB
yiaL	0.966655	-0.0489269	0.196971	0.531394	0.274583	0.952143	0.313632	DUF386 domain-containing protein YiaL
csdA	0.907893	-0.139406	0.197171	0.531621	0.274398	428.752	0.117249	cysteine sulfinate desulfinase
ymfJ	1.1386	0.187263	0.197307	0.531675	0.274354	11.5838	0.333677	e14 prophage; uncharacterized protein YmfJ
nanR	1.10819	0.148202	0.197617	0.532198	0.273927	360.188	0.126259	NanR
insB-3	0.86284	-0.212835	0.198648	0.534034	0.272431	63.0738	0.22429
malZ	1.16532	0.220722	0.198552	0.534034	0.272431	52.8408	0.248324	maltodextrin glucosidase
yecT	0.859847	-0.217848	0.198424	0.534034	0.272431	69.0336	0.241117	protein YecT
hypA	0.909147	-0.137414	0.19878	0.534075	0.272397	6.07832	0.331246	hydrogenase 3 nickel incorporation protein HypA
oxc	0.892837	-0.163531	0.199458	0.534957	0.271681	10.4173	0.334322	oxalyl-CoA decarboxylase
rbbA	0.863364	-0.211959	0.199231	0.534957	0.271681	67.9167	0.222166	ribosome-associated ATPase
speE	0.912626	-0.131904	0.199444	0.534957	0.271681	650.518	0.110442	spermidine synthase
rfbB	1.08555	0.118426	0.200079	0.536309	0.270585	1448.67	0.0974869	dTDP-glucose 4,6-dehydratase 1
cysN	0.891116	-0.166315	0.200421	0.536599	0.27035	12.3411	0.333198	sulfate adenylyltransferase subunit 1
rsxC	0.903015	-0.147178	0.200378	0.536599	0.27035	621.213	0.126379	SoxR [2Fe-2S] reducing system protein RsxC
yegW	1.15494	0.20782	0.200582	0.536717	0.270255	91.7372	0.213148	putative DNA-binding transcriptional regulator YegW
araC	0.871249	-0.198843	0.200799	0.536986	0.270037	16.736	0.32623	DNA-binding transcriptional dual regulator AraC
clsA	1.12404	0.168691	0.201403	0.537972	0.26924	188.971	0.151185	cardiolipin synthase A
rnd	0.910984	-0.134502	0.201392	0.537972	0.26924	511.681	0.113646	RNase D
elbB	1.16233	0.217018	0.201812	0.538748	0.268615	79.2588	0.241933	low activity glyoxalase ElbB
speF	1.14255	0.192258	0.202045	0.538748	0.268615	13.839	0.329888	inducible ornithine decarboxylase
yneE	0.895425	-0.159356	0.201992	0.538748	0.268615	235.561	0.140481	PF01062 family inner membrane protein YneE
aqpZ	0.900603	-0.151037	0.202475	0.539266	0.268197	7.88935	0.332081	water channel AqpZ
yciZ	1.16466	0.219912	0.202397	0.539266	0.268197	63.8672	0.26048	UPF0509 family protein YciZ
ydeR	0.932168	-0.101338	0.203139	0.540721	0.267027	3.08843	0.322726	putative fimbrial protein YdeR
cspA	0.926353	-0.110366	0.20338	0.540736	0.267015	152781	0.084584	cold shock protein CspA
solA	0.881626	-0.181761	0.203329	0.540736	0.267015	143.293	0.16985	N-methyl-L-tryptophan oxidase
ybfC	0.873579	-0.194991	0.203662	0.541172	0.266665	14.4199	0.327722	uncharacterized protein YbfC
rrfE	0.895208	-0.159706	0.204007	0.541277	0.266581	537.883	0.141295	5S ribosomal RNA
yaeQ	1.14815	0.199314	0.204055	0.541277	0.266581	124.194	0.197836	uncharacterized protein YaeQ
yphH	1.16257	0.217323	0.203909	0.541277	0.266581	33.3431	0.292314	putative DNA-binding transcriptional regulator, NAGC-like
ybjT	1.16197	0.216576	0.204254	0.541491	0.266408	54.745	0.244678	putative NAD(P)-binding protein YbjT
aslA	0.860129	-0.217376	0.205109	0.542024	0.265981	28.2827	0.291707	putative sulfatase AslA
crr	1.07801	0.108367	0.205164	0.542024	0.265981	2287.61	0.089376	Enzyme IIA<sup>Glc</sup>
kbl	0.901044	-0.150331	0.204871	0.542024	0.265981	326.698	0.131393	2-amino-3-ketobutyrate CoA ligase
ushA	1.15267	0.204974	0.204875	0.542024	0.265981	76.1617	0.21137	5'-nucleotidase / UDP-sugar hydrolase
yheO	0.903908	-0.145751	0.204936	0.542024	0.265981	419.409	0.126534	DNA-binding transcriptional regulator YheO
yhgP	1.1301	0.17645	0.204677	0.542024	0.265981	10.8672	0.332675	protein YhgP
pdeB	0.904563	-0.144708	0.205319	0.542123	0.265902	373.088	0.125361	c-di-GMP phosphodiesterase PdeB
frvB	0.869038	-0.202509	0.205908	0.543365	0.264908	19.9144	0.319799	putative PTS enzyme IIBC component FrvB
acrA	0.917896	-0.123597	0.206515	0.544166	0.264268	807.594	0.104213	multidrug efflux pump membrane fusion lipoprotein AcrA
mcrA	0.867808	-0.204553	0.206567	0.544166	0.264268	98.9404	0.213957	e14 prophage; Type IV methyl-directed restriction enzyme EcoKMcrA
nrdG	0.867521	-0.205029	0.206559	0.544166	0.264268	18.1378	0.316914	anaerobic ribonucleoside-triphosphate reductase activating protein
yfeY	1.13009	0.176436	0.206981	0.544631	0.263898	200.29	0.164791	DUF1131 domain-containing lipoprotein YfeY
yjgR	1.16255	0.217295	0.206946	0.544631	0.263898	33.5976	0.284269	DUF853 domain-containing protein YjgR
ubiI	1.12301	0.167366	0.207101	0.544635	0.263894	197.742	0.152325	2-octaprenylphenol 6-hydroxylase
arrS	0.946964	-0.0786179	0.207581	0.545271	0.263388	2.03533	0.317772	small regulatory RNA ArrS
yhaL	1.16203	0.216647	0.20751	0.545271	0.263388	54.5763	0.253338	uncharacterized protein YhaL
ddlA	0.906053	-0.142333	0.208257	0.545515	0.263193	366.062	0.123896	D-alanine&mdash;D-alanine ligase A
prc	1.07947	0.110323	0.208268	0.545515	0.263193	2183.28	0.0917461	tail-specific protease
ybfQ	0.934338	-0.0979842	0.20808	0.545515	0.263193	3.06799	0.321741	inactive transposase YbfQ
ybhL	1.10186	0.139937	0.20791	0.545515	0.263193	434.73	0.120925	Bax1-I family protein YbhL
yfeH	1.1597	0.213757	0.208182	0.545515	0.263193	69.3373	0.24143	putative solute:Na<sup>+</sup> symporter
ygiM	1.13684	0.18503	0.208989	0.547092	0.26194	277.19	0.177583	putative signal transduction protein (SH3 domain)
narV	0.927223	-0.109011	0.20954	0.547597	0.261539	4.37448	0.323702	nitrate reductase Z subunit &gamma;
ynaM	0.922362	-0.116595	0.209355	0.547597	0.261539	1454.6	0.0984056	Rac prophage; protein YnaM
yqgF	1.14666	0.197439	0.209444	0.547597	0.261539	93.0666	0.20042	ribonuclease H-like domain-containing nuclease
yohH	0.95211	-0.0707993	0.209713	0.547736	0.261428	2.19394	0.31626
kdpF	1.06754	0.0942893	0.210666	0.549751	0.259834	2.83071	0.320943	K<sup>+</sup> transporting P-type ATPase subunit KdpF
yifO	1.16002	0.214151	0.210724	0.549751	0.259834	59.3952	0.25091
ychQ	1.12522	0.170212	0.211074	0.550351	0.25936	159.144	0.158462	SirB family protein YchQ
dcuD	0.896954	-0.156894	0.211601	0.550514	0.259232	8.45599	0.331112	putative transporter DcuD
garD	1.11154	0.152555	0.211654	0.550514	0.259232	9.46464	0.330461	GarD
nth	0.905227	-0.143648	0.211356	0.550514	0.259232	339.666	0.126266	endonuclease III
yhiI	0.900877	-0.150598	0.211736	0.550514	0.259232	306.211	0.134291	putative membrane fusion protein YhiI
ykgJ	0.863098	-0.212404	0.211623	0.550514	0.259232	32.7352	0.29301	putative metal-chelating domain-containing protein YkgJ
glnH	0.871577	-0.198301	0.21205	0.550625	0.259144	177.208	0.205953	L-glutamine ABC transporter periplasmic binding protein
xerC	1.1296	0.175808	0.212139	0.550625	0.259144	156.84	0.166016	site-specific tyrosine recombinase
ydhB	1.16123	0.215659	0.211949	0.550625	0.259144	52.0371	0.263956
minE	1.12065	0.164342	0.212483	0.550633	0.259138	228.043	0.150906	Z-ring positioning protein MinE
pgm	0.912703	-0.131782	0.212502	0.550633	0.259138	674.138	0.114106	phosphoglucomutase
yjiA	1.15478	0.207624	0.212366	0.550633	0.259138	58.4306	0.230508	P-loop guanosine triphosphatase YjiA
ypdC	1.13663	0.184768	0.212694	0.550821	0.258989	126.52	0.180135	putative AraC-type DNA-binding transcriptional regulator YpdC
ssrS	1.07018	0.0978513	0.213235	0.551909	0.258132	164229	0.07632	6S RNA
gsiA	1.1589	0.212759	0.213944	0.553433	0.256935	44.6798	0.253294	glutathione ABC transporter ATP binding subunit GsiA
sutR	1.15787	0.211478	0.214348	0.554164	0.256362	54.6013	0.244502	DNA-binding transcriptional dual regulator SutR
ghxQ	1.14971	0.201268	0.215147	0.555918	0.254989	19.923	0.311603	guanine/hypoxanthine transporter GhxQ
alaE	1.15928	0.213223	0.21618	0.557786	0.253532	47.8022	0.279306	AlaE
hisQ	1.15813	0.211794	0.216356	0.557786	0.253532	34.9315	0.285874	lysine/arginine/ornithine ABC transporter / histidine ABC transporter, membrane subunit HisQ
lexA	0.930814	-0.103435	0.216292	0.557786	0.253532	2860.84	0.0876136	DNA-binding transcriptional repressor LexA
menI	1.15829	0.211998	0.216029	0.557786	0.253532	35.8327	0.282889	1,4-dihydroxy-2-naphthoyl-CoA hydrolase
gltV	0.936272	-0.0950008	0.216542	0.557814	0.253511	388648	0.0797547	tRNA-Glu(UUC)
mngA	1.08674	0.120008	0.21661	0.557814	0.253511	5.48168	0.324969	2-O-alpha-mannosyl-D-glycerate specific PTS enzyme II
def	0.926528	-0.110094	0.216895	0.558233	0.253185	1374.86	0.0935498	peptide deformylase
betT	1.08695	0.120282	0.217195	0.558482	0.252991	1642.37	0.103605	choline:H+ symporter
patZ	1.13555	0.18339	0.217235	0.558482	0.252991	118.769	0.181145	peptidyl-lysine <i>N</i>-acetyltransferase
gspM	1.11728	0.159985	0.217647	0.558549	0.252939	12.1427	0.329603	type II secretion system protein GspM
htpX	1.10034	0.137954	0.2179	0.558549	0.252939	392.813	0.121925	protease HtpX
insA-1	0.884247	-0.177479	0.217753	0.558549	0.252939	146.33	0.172536
waaL	0.90919	-0.137347	0.217543	0.558549	0.252939	559.323	0.12166	O-antigen ligase
yceB	1.09912	0.136346	0.21782	0.558549	0.252939	438.033	0.120299	putative lipid-binding lipoprotein YceB
yoeE	1.05757	0.0807471	0.217991	0.558549	0.252939	2.24708	0.317805
yhjR	0.864432	-0.210175	0.218208	0.558794	0.252749	56.9834	0.251153	PF10945 family protein YhjR
ydhF	1.14696	0.197812	0.218481	0.559179	0.252449	82.7631	0.209064	putative oxidoreductase YdhF
rssB	1.13773	0.18616	0.218827	0.559441	0.252245	104.215	0.186498	RssB-P // regulator of RpoS
ybcI	0.897005	-0.156812	0.218775	0.559441	0.252245	9.26891	0.329441	PF04307 family inner membrane protein YbcI
arfB	1.15298	0.205367	0.219517	0.560001	0.251811	62.5997	0.231439	peptidyl-tRNA hydrolase, ribosome rescue factor
nimR	1.15765	0.211194	0.219534	0.560001	0.251811	35.2189	0.277166	DNA-binding transcriptional repressor NimR
yjjY	1.14463	0.194876	0.219413	0.560001	0.251811	78.7715	0.204356	uncharacterized protein YjjY
yqjK	1.1431	0.192949	0.21947	0.560001	0.251811	103.913	0.199706	PF13997 family protein YqjK
ybgK	1.15763	0.211176	0.219685	0.560075	0.251754	46.2445	0.260861
cdgI	0.922355	-0.116606	0.220269	0.561253	0.250842	4.7591	0.324099	putative c-di-GMP binding protein CdgI
cynT	1.04611	0.0650406	0.220607	0.561802	0.250417	1.48587	0.314954	carbonic anhydrase 1
ynjI	1.14462	0.194868	0.221001	0.562491	0.249884	80.5715	0.205963	DUF1266 domain-containing protein YnjI
yrbN	0.917828	-0.123704	0.221336	0.563033	0.249466	752.357	0.108545	uncharacterized protein YrbN
psd	0.895717	-0.158885	0.22155	0.563264	0.249288	219.622	0.148457	phosphatidylserine decarboxylase proenzyme // phosphatidylserine decarboxylase, &beta; chain // phosphatidylserine decarboxylase, &alpha; chain
gabT	1.07668	0.106592	0.221942	0.563384	0.249195	3.60399	0.322399	4-aminobutyrate aminotransferase GabT
mdtH	0.910565	-0.135166	0.221965	0.563384	0.249195	7.44436	0.327397	multidrug efflux pump MdtH
moaB	1.15623	0.209431	0.221748	0.563384	0.249195	41.5399	0.273145	protein MoaB
tabA	1.14583	0.196389	0.222095	0.563401	0.249182	107.449	0.209092	DUF386 domain-containing toxin-antitoxin biofilm protein TabA
asmA	1.11201	0.153172	0.22229	0.563586	0.24904	362.519	0.141236	putative assembly protein AsmA
ybiE	1.12084	0.164577	0.223201	0.565583	0.247504	11.4677	0.327371	protein YbiE
ampE	1.1553	0.208266	0.224462	0.566277	0.246971	42.3893	0.268479	protein AmpE
bioB	1.1209	0.164662	0.223759	0.566277	0.246971	14.3379	0.327753	biotin synthase
fdx	0.884413	-0.177207	0.224366	0.566277	0.246971	148.356	0.17616	oxidized ferredoxin // reduced ferredoxin
insL-2	0.884892	-0.176426	0.224182	0.566277	0.246971	150.185	0.174987
kefB	1.1465	0.197236	0.224218	0.566277	0.246971	72.3949	0.21461	K+ : H+ antiporter KefB
prmB	1.10656	0.146078	0.224045	0.566277	0.246971	328.039	0.133152	ribosomal protein L3 <i>N</i><sup>5</sup>-glutamine methyltransferase
rfe	0.919853	-0.120525	0.224194	0.566277	0.246971	825.069	0.105946	UDP-<i>N</i>-acetylglucosamine&mdash;undecaprenyl-phosphate <i>N</i>-acetylglucosaminephosphotransferase
ubiD	1.082	0.113703	0.224021	0.566277	0.246971	832.83	0.0987435	3-octaprenyl-4-hydroxybenzoate decarboxylase
yghB	1.10762	0.147461	0.2247	0.566565	0.246751	290.772	0.134984	DedA family protein YghB
acpP	0.936712	-0.0943221	0.225268	0.567686	0.245892	10961.5	0.0807719	octanoyl-ACP // lipoyl-ACP // <i>cis</i>-&Delta;<sup>5</sup>-dodecenoyl-ACP // <i>trans</i>-&Delta;<sup>2</sup>-cis-&Delta;<sup>5</sup>-dodecenoyl-ACP // succinyl-ACP // <i>cis</i>-&Delta;<SUP>3</SUP>-decenoyl-ACP // 3-oxo-<i>cis</i>-&Delta;<sup>5</sup>-dodecenoyl-ACP // (3<i>R</i>)-hydroxy <i>cis</i> &Delta;<sup>5</sup>-dodecenoyl-ACP // (3<i>R</i>)-3-hydroxybutanoyl-ACP // <i>trans</i> oct-2-en…
ykgE	1.07007	0.0977075	0.225933	0.56905	0.24485	5.30125	0.320596	putative lactate utilization oxidoreductase YkgE
yciQ	1.11501	0.157054	0.226308	0.569368	0.244607	243.201	0.147283	DUF2207 domain-containing protein YciQ
ydiN	0.96859	-0.0460419	0.226291	0.569368	0.244607	0.841455	0.313046	putative transporter YdiN
hybB	1.1454	0.195852	0.226576	0.569729	0.244332	22.4854	0.307149	hydrogenase 2 membrane subunit
hemY	1.09918	0.136433	0.226895	0.570219	0.243958	579.033	0.124105	protein HemY
ymjA	1.1378	0.186243	0.227357	0.571068	0.243313	118.133	0.194077	DUF2543 domain-containing protein YmjA
glnD	0.889081	-0.169613	0.227828	0.571938	0.242651	193.668	0.166404	protein-PII uridylyltransferase/uridylyl-removing enzyme
ysgA	1.15183	0.203927	0.228063	0.572216	0.24244	28.6139	0.288169	putative dienelactone hydrolase
lpoA	1.12344	0.167922	0.228276	0.572436	0.242273	159.046	0.163388	outer membrane lipoprotein - activator of MrcA activity
yjbB	1.14624	0.196911	0.229238	0.574535	0.240684	70.231	0.219286	putative inorganic phosphate export protein YjbB
map	0.932761	-0.10042	0.229802	0.575634	0.239853	2796.03	0.0875397	methionine aminopeptidase
hcaD	0.927124	-0.109166	0.23028	0.576181	0.239441	4.49253	0.322409	putative 3-phenylpropionate/cinnamate dioxygenase ferredoxin reductase subunit
livK	1.15094	0.202814	0.230648	0.576181	0.239441	29.3168	0.289437	L-leucine/L-phenylalanine ABC transporter periplasmic binding protein
rclC	0.910515	-0.135245	0.230565	0.576181	0.239441	6.43693	0.325785	DUF417 domain-containing inner membrane protein RclC
ygeX	0.933855	-0.0987292	0.230494	0.576181	0.239441	4.24167	0.320416	2,3-diaminopropionate ammonia-lyase
ypjJ	1.06181	0.0865316	0.230422	0.576181	0.239441	2.65899	0.318141	CP4-57 prophage; DUF987 domain-containing protein YpjJ
hinT	1.13102	0.177621	0.231053	0.576663	0.239078	144.215	0.180051	purine nucleoside phosphoramidase
leuU	0.94358	-0.0837832	0.231104	0.576663	0.239078	126590	0.0764947	tRNA-Leu(GAG)
tmk	0.884742	-0.176671	0.231218	0.576663	0.239078	115.093	0.179305	Tmk
uhpB	1.14784	0.198924	0.231392	0.576783	0.238987	62.6123	0.230004	sensory histidine kinase UhpB - phosphorylated // sensory histidine kinase UhpB
insE-5	1.14563	0.196138	0.231772	0.577417	0.238511	26.3464	0.302753
dinQ	1.09893	0.136099	0.232089	0.577805	0.238219	367.627	0.124596	membrane toxin DinQ
yafS	1.10823	0.14826	0.23218	0.577805	0.238219	233.61	0.139072	putative S-adenosyl-L-methionine-dependent methyltransferase
fdhD	0.88505	-0.176169	0.23254	0.577897	0.23815	111.229	0.179328	sulfurtransferase for molybdenum cofactor sulfuration
nanC	0.924191	-0.113737	0.232419	0.577897	0.23815	5.47277	0.322356	<i>N</i>-acetylneuraminate outer membrane channel
yehY	1.07365	0.10253	0.232594	0.577897	0.23815	3.89403	0.32051	glycine betaine ABC transporter membrane subunit YehY
ydcA	1.15056	0.202334	0.233059	0.578739	0.237517	52.3386	0.24596	protein YdcA
yccS	0.910371	-0.135474	0.233312	0.579052	0.237282	335.41	0.124512	putative transporter YccS
yfcR	1.06879	0.0959787	0.233473	0.579139	0.237217	3.65781	0.319386	putative fimbrial protein YfcR
cedA	0.885083	-0.176116	0.233631	0.579219	0.237157	115.964	0.180242	cell division modulator
bglH	0.901709	-0.149267	0.234192	0.579983	0.236585	8.4765	0.325183	carbohydrate-specific outer membrane porin, cryptic
murJ	0.895661	-0.158976	0.234083	0.579983	0.236585	175.361	0.154298	lipid II flippase MurJ
mepH	0.880803	-0.183108	0.234636	0.580769	0.235997	110.665	0.193779	peptidoglycan endopeptidase/peptidoglycan L,D-carboxypeptidase MepH
yebB	0.89578	-0.158784	0.235173	0.581469	0.235473	11.4465	0.324697	putative papain-like amidase YebB
ynaK	0.892164	-0.164619	0.235163	0.581469	0.235473	12.015	0.323518	Rac prophage; ParB-like nuclease domain-containing protein YnaK
argF	1.1378	0.186243	0.23609	0.582529	0.234682	21.86	0.311046	CP4-6 prophage; ornithine carbamoyltransferase ArgF
hokC	1.15054	0.202309	0.236309	0.582529	0.234682	41.8017	0.259793	protein HokC
pdeD	0.884265	-0.177449	0.236185	0.582529	0.234682	18.6497	0.318157	putative c-di-GMP phosphodiesterase PdeD
puuP	1.14998	0.201613	0.236309	0.582529	0.234682	44.271	0.26337	putrescine:H+ symporter PuuP
rrrD	0.872836	-0.196217	0.236363	0.582529	0.234682	60.246	0.230537	DLP12 prophage; lysozyme
yahJ	0.870834	-0.19953	0.236235	0.582529	0.234682	28.4049	0.283854	amidohydrolase family protein YahJ
rydC	1.0844	0.116891	0.236852	0.583422	0.234017	1321.3	0.323094	small regulatory RNA RydC
hisF	1.14993	0.20154	0.237419	0.584474	0.233235	36.5839	0.269236	imidazole glycerol phosphate synthase subunit HisF
mdtP	0.891918	-0.165018	0.237534	0.584474	0.233235	12.4167	0.321472	putative multidrug efflux pump outer membrane channel
yafN	0.870664	-0.199812	0.237672	0.584499	0.233216	40.5575	0.276493	antitoxin YafN
secY	0.941738	-0.0866023	0.238604	0.586477	0.231749	18794.2	0.0759563	Sec translocon subunit SecY
aspT	0.923346	-0.115057	0.23896	0.586594	0.231663	531409	0.106092	tRNA-Asp(GUC)
fixA	0.951767	-0.0713189	0.239224	0.586594	0.231663	1.90562	0.31551	putative electron transfer flavoprotein FixA
galT	1.14898	0.200357	0.238905	0.586594	0.231663	56.6177	0.251945	galactose-1-phosphate uridylyltransferase
hflK	1.08547	0.118323	0.239651	0.586594	0.231663	680.427	0.107462	regulator of FtsH protease
mcbA	1.08316	0.115245	0.239491	0.586594	0.231663	4.83842	0.322346	DUF1471 domain-containing protein McbA
pdeI	0.876834	-0.189625	0.239802	0.586594	0.231663	86.1075	0.214579	putative c-di-GMP phosphodiesterase PdeI
trpR	0.887157	-0.172738	0.239724	0.586594	0.231663	114.257	0.178255	DNA-binding transcriptional repressor TrpR
ybjJ	1.14456	0.194792	0.239691	0.586594	0.231663	65.2594	0.227117	inner membrane protein YbjJ
yefM	1.12551	0.170573	0.239286	0.586594	0.231663	227.708	0.17316	YefM antitoxin of the YoeB-YefM toxin-antitoxin pair and DNA binding transcriptional repressor
alkA	1.14143	0.190844	0.23999	0.586741	0.231554	22.8233	0.302909	DNA-3-methyladenine glycosylase 2
yciI	1.13637	0.184429	0.240294	0.587173	0.231234	84.355	0.200392	protein YciI
cadB	0.899571	-0.152691	0.241	0.587933	0.230672	9.62045	0.323624	lysine:cadaverine antiporter
dsdA	0.880525	-0.183564	0.241118	0.587933	0.230672	19.2782	0.310313	D-serine ammonia-lyase
iap	0.883709	-0.178356	0.240964	0.587933	0.230672	100.607	0.189188	alkaline phosphatase isozyme conversion protein
sgcX	0.906967	-0.140878	0.240865	0.587933	0.230672	8.24183	0.323455	KpLE2 phage-like element; putative endoglucanase with Zn-dependent exopeptidase domain
nadA	1.14833	0.199537	0.241371	0.588237	0.230447	37.2521	0.274296	quinolinate synthase
argC	0.872787	-0.196299	0.242526	0.588341	0.230371	35.9608	0.284587	N-acetylglutamylphosphate reductase
fepB	1.12945	0.175623	0.242567	0.588341	0.230371	109.622	0.184812	ferric enterobactin ABC transporter periplasmic binding protein
katE	0.892609	-0.163899	0.242371	0.588341	0.230371	12.5674	0.31994	catalase HPII
mokC	1.14655	0.197303	0.242222	0.588341	0.230371	52.0363	0.242971	regulatory protein MokC
murB	0.914248	-0.129343	0.241915	0.588341	0.230371	507.516	0.120391	UDP-<i>N</i>-acetylenolpyruvoylglucosamine reductase
smpB	1.09114	0.12584	0.241695	0.588341	0.230371	500.019	0.116046	SsrA-binding protein
thiC	1.10593	0.145259	0.24187	0.588341	0.230371	328.345	0.139	phosphomethylpyrimidine synthase
tnaA	0.899294	-0.153134	0.242422	0.588341	0.230371	10.1226	0.323192	tryptophanase
yfgI	0.871991	-0.197615	0.241968	0.588341	0.230371	42.2459	0.254224	nalidixic acid resistance protein YfgI
chbG	1.14344	0.193386	0.242698	0.588347	0.230366	24.0961	0.29483	chitooligosaccharide monodeacetylase ChbG
creD	1.1469	0.197745	0.243003	0.588464	0.23028	29.9264	0.279681	putative inner membrane protein CreD
macA	1.1462	0.196855	0.242984	0.588464	0.23028	50.2284	0.246791	ABC-type tripartite efflux pump membrane fusion protein
alkB	0.884083	-0.177746	0.244352	0.588485	0.230265	17.0992	0.313051	DNA oxidative demethylase
argQ	1.14316	0.193022	0.243997	0.588485	0.230265	79482.1	0.29557	tRNA-Arg(ACG)
cmk	0.926226	-0.110563	0.244935	0.588485	0.230265	1003.36	0.100807	cytidylate kinase
melA	0.874491	-0.193485	0.243499	0.588485	0.230265	27.4874	0.291072	&alpha;-galactosidase
nanM	0.883113	-0.17933	0.24333	0.588485	0.230265	18.9507	0.311081	<i>N</i>-acetylneuraminate mutarotase
ndh	0.932195	-0.101297	0.244434	0.588485	0.230265	1698.27	0.0914804	NADH:quinone oxidoreductase II
purA	0.929699	-0.105164	0.244741	0.588485	0.230265	1506.41	0.0953047	adenylosuccinate synthetase
rrsH	0.914589	-0.128805	0.244872	0.588485	0.230265	5154.41	0.121264	16S ribosomal RNA
smrB	0.888061	-0.171269	0.24414	0.588485	0.230265	139.018	0.179306	ribosome rescue factor SmrB
yedL	0.920442	-0.119602	0.244008	0.588485	0.230265	7.49931	0.322056	putative acetyltransferase YedL
ygcG	0.935665	-0.0959355	0.244522	0.588485	0.230265	3.68015	0.318766	TPM domain-containing protein YgcG
yiaU	0.8793	-0.185573	0.244933	0.588485	0.230265	98.0515	0.208226	putative DNA-binding transcriptional regulator YiaU
yjhH	1.12936	0.175504	0.244273	0.588485	0.230265	14.3862	0.314544	KpLE2 phage-like element; putative 2-dehydro-3-deoxy-D-pentonate aldolase
yjjI	1.12584	0.171001	0.243688	0.588485	0.230265	15.7139	0.318197	DUF3029 domain-containing protein YjjI
yrdD	1.09219	0.127222	0.24476	0.588485	0.230265	480.233	0.118523	putative DNA topoisomerase
apaH	1.12871	0.174678	0.245479	0.589483	0.229529	102.856	0.185988	diadenosine tetraphosphatase
yfjM	0.891154	-0.166254	0.246084	0.590628	0.228686	12.812	0.318306	CP4-57 prophage; protein YfjM
bamE	0.926243	-0.110538	0.246657	0.591248	0.22823	785.556	0.101649	outer membrane protein assembly factor BamE
grxC	0.913529	-0.130478	0.246723	0.591248	0.22823	355.258	0.123223	oxidized glutaredoxin 3 // reduced glutaredoxin 3
ohsC	0.87703	-0.189302	0.246858	0.591248	0.22823	22.6074	0.295454	small regulatory RNA OhsC
yebO	0.930268	-0.104282	0.246822	0.591248	0.22823	1344.12	0.0949121	uncharacterized protein YebO
recG	0.91476	-0.128534	0.247789	0.593169	0.226822	415.01	0.121359	ATP-dependent DNA helicase RecG
nrdF	1.1434	0.193336	0.24833	0.593843	0.226328	32.7768	0.282103	ribonucleoside-diphosphate reductase 2 subunit &beta;
yjfJ	0.883596	-0.178542	0.248235	0.593843	0.226328	20.208	0.308219	PspA family protein YjfJ
adk	0.928243	-0.107425	0.248733	0.594188	0.226076	1572.45	0.0985616	adenylate kinase
yhdZ	0.882758	-0.17991	0.248655	0.594188	0.226076	17.7032	0.307168	putative ABC transporter ATP-binding subunit YhdZ
hisC	1.13625	0.184281	0.249207	0.594262	0.226022	27.4904	0.301794	histidinol-phosphate aminotransferase
prfC	0.916631	-0.125586	0.249177	0.594262	0.226022	474.697	0.118256	peptide chain release factor RF3
ycfT	1.09734	0.134011	0.249382	0.594262	0.226022	7.28743	0.322641	inner membrane protein YcfT
yghU	1.14473	0.195009	0.249511	0.594262	0.226022	32.7775	0.272985	disulfide reductase / organic hydroperoxide reductase
yijF	0.909549	-0.136776	0.249171	0.594262	0.226022	7.48916	0.322251	DUF1287 domain-containing protein YijF
ynfH	1.13581	0.183721	0.249541	0.594262	0.226022	83.4753	0.206721	putative menaquinol dehydrogenase
yahD	1.05065	0.0712771	0.250077	0.594972	0.225503	2.05398	0.315252	ankyrin repeat-containing protein YahD
yjeH	1.13548	0.183308	0.250098	0.594972	0.225503	106.966	0.206723	L-methionine/branched chain amino acid exporter
mgrR	0.930264	-0.104288	0.250752	0.596218	0.224595	8419.29	0.0958057	small regulatory RNA MgrR
hisB	1.14363	0.193614	0.251055	0.596629	0.224296	38.6811	0.263197	imidazoleglycerol-phosphate dehydratase / histidinol-phosphatase
eutQ	1.03207	0.0455444	0.252004	0.597304	0.223805	0.997654	0.311784	putative ethanolamine utilization acetate kinase EutQ
hlyE	1.09304	0.128343	0.252072	0.597304	0.223805	6.57233	0.321616	hemolysin E
iadA	1.14029	0.189397	0.251979	0.597304	0.223805	66.8777	0.227583	isoaspartyl dipeptidase
yafK	1.08248	0.114347	0.25212	0.597304	0.223805	770.46	0.106393
ygeH	0.883993	-0.177894	0.251744	0.597304	0.223805	19.2853	0.306776	putative transcriptional regulator YgeH
yidQ	1.13737	0.185703	0.251675	0.597304	0.223805	71.0941	0.215486	DUF1375 domain-containing putative lipoprotein YidQ
rbsB	1.09691	0.13345	0.252253	0.597311	0.223799	358.236	0.128299	ribose ABC transporter periplasmic binding protein
ompN	0.881188	-0.182478	0.25257	0.597753	0.223478	25.5936	0.299282	outer membrane porin N
ileS	1.07487	0.104163	0.253266	0.599092	0.222507	1075.86	0.0960184	isoleucine&mdash;tRNA ligase
mcbR	0.883078	-0.179388	0.25416	0.600586	0.221425	19.4589	0.304684	DNA-binding transcriptional dual regulator McbR
yohF	1.07267	0.101206	0.254125	0.600586	0.221425	3.98393	0.319288	putative oxidoreductase YohF
cra	1.10456	0.143477	0.254936	0.601629	0.220671	275.468	0.141797	DNA-binding transcriptional dual regulator Cra
leuZ	0.887192	-0.172681	0.254994	0.601629	0.220671	371927	0.307607	tRNA-Leu(UAA)
yehQ	1.10107	0.138909	0.254805	0.601629	0.220671	8.18837	0.321469	SWIM zinc finger domains-containing protein YehQ
ccmE	0.909435	-0.136957	0.255523	0.601896	0.220478	7.89659	0.321097	periplasmic heme chaperone
clpP	0.917895	-0.123599	0.255894	0.601896	0.220478	424.117	0.118028	ATP-dependent Clp protease proteolytic subunit
glnQ	0.881283	-0.182323	0.255682	0.601896	0.220478	95.3276	0.212625	L-glutamine ABC transporter ATP binding subunit
insC-3	0.883234	-0.179132	0.255856	0.601896	0.220478	22.346	0.302395
symR	1.08313	0.115212	0.255255	0.601896	0.220478	1745.99	0.10818	small regulatory RNA antitoxin SymR
yfbV	0.892723	-0.163715	0.255616	0.601896	0.220478	128.668	0.172409	PF04217 family membrane protein YfbV
gntU	1.14282	0.192604	0.256068	0.601997	0.220406	42.571	0.258706	low-affinity gluconate transporter
araB	0.904182	-0.145314	0.256583	0.60259	0.219978	9.74408	0.320066	ribulokinase
umuC	0.876823	-0.189642	0.256471	0.60259	0.219978	31.9941	0.279061	DNA polymerase V catalytic protein
sroH	1.08073	0.112005	0.256728	0.602622	0.219955	1989.41	0.10495	small RNA SroH
ybhB	0.878287	-0.187235	0.257608	0.604377	0.218692	55.3429	0.231153	putative kinase inhibitor
yqiG	0.886744	-0.17341	0.25828	0.605645	0.217782	101.201	0.192745	putative outer membrane usher protein YqiG
slyB	0.926771	-0.109715	0.259074	0.606887	0.216892	700.966	0.103463	outer membrane lipoprotein SlyB
yfeR	0.883873	-0.17809	0.25901	0.606887	0.216892	20.5547	0.303337	putative DNA-binding transcriptional regulator YfeR
murP	1.12907	0.17513	0.259244	0.606974	0.21683	18.0174	0.305129	N-acetylmuramic acid-specific PTS enzyme IICB component / anhydro-N-acetylmuramic acid transporter
yegR	0.93564	-0.0959753	0.259508	0.607282	0.216609	3.92654	0.318064	uncharacterized protein YegR
arsR	0.87718	-0.189054	0.259718	0.607312	0.216588	39.3437	0.270216	DNA-binding transcriptional repressor ArsR
higA	0.879727	-0.184873	0.259785	0.607312	0.216588	78.0254	0.223452	antitoxin/DNA-binding transcriptional repressor HigA
fiu	1.10807	0.148045	0.259985	0.60747	0.216475	449.608	0.150339	iron catecholate outer membrane transporter Fiu
yjbR	1.13614	0.184135	0.260289	0.607872	0.216188	69.3688	0.223132	PF04237 family protein YjbR
etk	0.886896	-0.173163	0.260552	0.608122	0.216009	93.1491	0.193855	protein-tyrosine kinase Etk
oppC	1.11159	0.152624	0.260662	0.608122	0.216009	226.867	0.156784	murein tripeptide ABC transporter / oligopeptide ABC transporter inner membrane subunit OppC
yqgG	0.905971	-0.142464	0.260803	0.608142	0.215995	271.433	0.143443	protein YqgG
mrcA	1.08286	0.114843	0.261104	0.608269	0.215904	584.334	0.109558	peptidoglycan glycosyltransferase / peptidoglycan DD-transpeptidase MrcA
uxaC	0.879376	-0.185448	0.261122	0.608269	0.215904	57.9427	0.230931	D-glucoronate/D-galacturonate isomerase
hyfD	0.94259	-0.0852972	0.262211	0.610496	0.214317	3.07862	0.316253	hydrogenase 4 component D
zupT		-0.154176	0.262489	0.610833	0.214077	152.903	0.160872	divalent metal ion transporter ZupT
fetA	1.13046	0.176904	0.263001	0.611714	0.213451	87.1772	0.204114	putative iron ABC exporter ATP-binding subunit FetA
yhhX	0.908307	-0.138748	0.263533	0.612329	0.213015	963.326	0.139453	putative oxidoreductase YhhX
ytfP	0.921182	-0.118442	0.263423	0.612329	0.213015	476.81	0.114423	&gamma;-glutamylamine cyclotransferase family protein YtfP
ddpB	1.07506	0.104411	0.263747	0.612517	0.212882	4.65745	0.318402	putative D,D-dipeptide ABC transporter membrane subunit DdpB
gntR	1.10229	0.140504	0.264208	0.613277	0.212343	367.192	0.141576	DNA-binding transcriptional repressor GntR
abpB	1.11366	0.155306	0.265374	0.613997	0.211834	159.819	0.163222	CP4-57 prophage; putative helicase YfjK
elaB	1.13785	0.186305	0.265341	0.613997	0.211834	33.2061	0.272537	tail-anchored inner membrane protein ElaB
oppF	1.1218	0.165818	0.265302	0.613997	0.211834	242.242	0.181355	murein tripeptide ABC transporter / oligopeptide ABC transporter ATP binding subunit OppF
uvrD	0.920963	-0.118784	0.265141	0.613997	0.211834	442.755	0.115186	DNA helicase II
yddG	1.13781	0.186256	0.264802	0.613997	0.211834	50.4926	0.241354	amino acid exporter YddG
yehK	0.963705	-0.0533358	0.264818	0.613997	0.211834	1.17485	0.312527	uncharacterized protein YehK
yobD	1.13723	0.185518	0.265454	0.613997	0.211834	49.8358	0.238357	DUF986 domain-containing inner membrane protein YobD
nemA	1.13165	0.178429	0.265682	0.614213	0.211681	73.2946	0.210351	<i>N</i>-ethylmaleimide reductase
ybbJ	1.13261	0.179652	0.265837	0.614262	0.211646	21.2566	0.293189	NfeD-like family protein YbbJ
ycbK	0.91787	-0.123639	0.266034	0.614408	0.211543	381.085	0.121124
dxs	1.08615	0.119219	0.26721	0.616814	0.209846	501.049	0.11608	1-deoxy-D-xylulose-5-phosphate synthase
envZ	0.898062	-0.155112	0.267649	0.617517	0.209351	143.209	0.165091	sensor histidine kinase EnvZ
rpiB	1.13265	0.179702	0.267953	0.617908	0.209076	24.2347	0.290951	allose-6-phosphate isomerase / ribose-5-phosphate isomerase B
yjdF	0.892661	-0.163816	0.26933	0.620772	0.207068	16.2417	0.309403	DUF2238 domain-containing inner membrane protein YjdF
yphD	1.0837	0.115967	0.269615	0.621116	0.206828	5.49946	0.31875	putative ABC transporter membrane subunit YphD
anmK	1.13302	0.180178	0.271192	0.62222	0.206056	60.153	0.223777	anhydro-<i>N</i>-acetylmuramic acid kinase
ddpX	1.04013	0.0567626	0.271092	0.62222	0.206056	1.78413	0.312909	D-alanyl-D-alanine dipeptidase
glmU	0.924299	-0.113569	0.271147	0.62222	0.206056	1099.07	0.111153	fused N-acetylglucosamine-1-phosphate uridyltransferase and glucosamine-1-phosphate acetyltransferase
hycB	0.970072	-0.0438358	0.271439	0.62222	0.206056	0.713634	0.312463	formate hydrogenlyase subunit HycB
insB-5	0.883998	-0.177885	0.270787	0.62222	0.206056	74.4844	0.217349
matP	0.909665	-0.136593	0.270535	0.62222	0.206056	289.521	0.139153	macrodomain Ter protein
rsmD	0.889012	-0.169725	0.270953	0.62222	0.206056	91.1096	0.194579	16S rRNA m<sup>2</sup>G966 methyltransferase
[truncated: 2,600 more rows]

## Sheet: FliX overexpression
Gene name	Fold change	log2 Fold Change	p-value	padj	-log (padj)	baseMean	lfcSE	Gene Description
fliX	167.203	7.38546	1.9057e-100	8.74336e-97	96.0583	164769	0.349334	Sigma 28 dependent sRNA
carB	7.55366	2.91718	4.29249e-57	9.84697e-54	53.0067	451.668	0.185268	carbamoyl-phosphate synthetase large subunit
tyrT	3.02031	1.5947	1.16312e-38	1.77879e-35	34.7499	344085	0.12422	tRNA-Tyr(GUA)
carA	7.2071	2.84942	9.40977e-32	1.0793e-28	27.9669	176.824	0.248465	carbamoyl-phosphate synthetase small subunit
csrB	1.87068	0.903561	1.62737e-15	6.78763e-13	12.1683	9653.69	0.118465	small regulatory RNA CsrB
sokB	1.74316	0.801703	1.61156e-11	3.89149e-09	8.40988	2325.31	0.126259	putative small regulatory RNA antitoxin SokB
sokC	1.80399	0.851194	8.24657e-10	1.89176e-07	6.72313	1809.27	0.14949	small regulatory RNA antitoxin SokC
bsmA	1.87482	0.906754	8.96631e-10	1.95893e-07	6.70798	491.46	0.159938	DUF1471 domain-containing putative lipoprotein BsmA
uraA	2.14269	1.09942	1.01329e-09	1.97926e-07	6.7035	168.321	0.195247	uracil:H<sup>+</sup> symporter UraA
emrD	2.04098	1.02926	1.03536e-09	1.97926e-07	6.7035	188.069	0.182671	multidrug efflux pump EmrD
pyrB	3.78062	1.91862	2.22276e-09	3.92232e-07	6.40646	49.6459	0.349553	aspartate carbamoyltransferase catalytic subunit
dusB	1.50081	0.585739	1.18238e-08	1.80825e-06	5.74274	2706.11	0.11093	tRNA-dihydrouridine synthase B
suhB	1.57639	0.656628	4.44219e-08	6.17599e-06	5.20929	2253.56	0.131131	Nus factor SuhB
treC	2.4157	1.27244	2.12953e-07	2.32626e-05	4.63334	77.866	0.275646	trehalose-6-phosphate hydrolase
upp	1.556	0.637842	2.56655e-07	2.61674e-05	4.58224	872.815	0.136826	uracil phosphoribosyltransferase
sokX	2.25834	1.17526	3.35733e-07	3.27733e-05	4.48448	88.8239	0.260586	small RNA SokX
mltD	1.49408	0.579256	4.15662e-07	3.73932e-05	4.42721	5209.43	0.126588	membrane-bound lytic murein transglycosylase D
sibC	1.43469	0.520735	6.85933e-07	5.61975e-05	4.25028	3231.53	0.115503	small regulatory RNA antitoxin SibC
valZ	1.41287	0.498629	7.16675e-07	5.76861e-05	4.23893	660304	0.11049	tRNA-Val(UAC)
glnP	1.79218	0.841719	9.17175e-07	6.89836e-05	4.16125	489.408	0.194474	L-glutamine ABC transporter membrane subunit
pheV	1.74968	0.807094	1.40711e-06	0.000104126	3.98244	267712	0.190252	tRNA-Phe(GAA)
mgtT	1.68209	0.750255	1.74913e-06	0.000127381	3.8949	226.753	0.1785	protein MgtT
yqeI	1.64143	0.714954	1.88533e-06	0.000135155	3.86917	590.546	0.170172	putative transcriptional regulator YqeI
bipA	1.43128	0.517302	5.26551e-06	0.000330933	3.48026	2043.57	0.12779	50S ribosomal subunit assembly factor BipA
glnQ	1.86534	0.899439	8.61194e-06	0.000513137	3.28977	318.914	0.238005	L-glutamine ABC transporter ATP binding subunit
mrcA	1.43041	0.516425	1.13793e-05	0.000652603	3.18535	503.933	0.133765	peptidoglycan glycosyltransferase / peptidoglycan DD-transpeptidase MrcA
bioF	2.87066	1.52138	1.24976e-05	0.000707888	3.15004	43.7983	0.420919	8-amino-7-oxononanoate synthase
rnpB	1.52555	0.609328	1.55741e-05	0.000860894	3.06505	40848.6	0.163387	RNase P catalytic RNA component
fnrS	1.34278	0.425224	1.8655e-05	0.000995225	3.00208	40150.8	0.110418	small regulatory RNA FnrS
rfbA	1.53922	0.622203	2.49003e-05	0.00129821	2.88665	490.194	0.173017	glucose-1-phosphate thymidylyltransferase 1
appY	1.77066	0.824283	2.59632e-05	0.00133842	2.87341	126.246	0.234586	DLP12 prophage; DNA-binding transcriptional activator AppY
yshB	1.55682	0.638605	2.88673e-05	0.00145837	2.83613	371.535	0.180011	uncharacterized protein YshB
melR	1.49938	0.584361	2.92436e-05	0.00145837	2.83613	323.809	0.163598	DNA-binding transcriptional dual regulator MelR
nupC	1.42665	0.51263	2.89951e-05	0.00145837	2.83613	692.007	0.141755	nucleoside:H<sup>+</sup> symporter NupC
speA	1.40321	0.488729	3.3016e-05	0.00162879	2.78814	748.265	0.135236	biosynthetic arginine decarboxylase
rsxE	1.7681	0.822201	3.43976e-05	0.0016789	2.77498	95.9974	0.239278	SoxR [2Fe-2S] reducing system protein RsxE
yhhA	1.50659	0.591283	3.96562e-05	0.00191519	2.71779	351.705	0.169742	DUF2756 domain-containing protein YhhA
dinQ	1.47258	0.558346	4.44107e-05	0.0021058	2.67658	376.359	0.160772	membrane toxin DinQ
cmk	1.36971	0.453867	4.65533e-05	0.00214347	2.66888	611.145	0.127991	cytidylate kinase
infA	1.40684	0.492462	4.87173e-05	0.00221302	2.65501	3607.99	0.140756	translation initiation factor IF-1
ydhC	1.4824	0.567934	5.3286e-05	0.00237355	2.6246	323.265	0.166284
bioD	3.5943	1.84571	6.3389e-05	0.00279643	2.5534	23.6295	0.584367	dethiobiotin synthetase
tff	1.32252	0.403294	7.14383e-05	0.00301721	2.52039	4246.53	0.115744	putative small RNA T44
cspE	1.43998	0.52605	7.60897e-05	0.00317363	2.49844	28310.6	0.156403	transcription antiterminator and regulator of RNA stability CspE
bioA	2.06636	1.04709	0.000163464	0.0065215	2.18565	65.5625	0.3617	adenosylmethionine-8-amino-7-oxononanoate aminotransferase
rplK	1.33586	0.417771	0.000172107	0.00674895	2.17076	2066.97	0.129925	50S ribosomal subunit protein L11
atpH	1.2935	0.37128	0.000179557	0.00698143	2.15606	1973.58	0.113794	ATP synthase F<sub>1</sub> complex subunit &delta;
treB	1.62621	0.701512	0.000183616	0.00707924	2.15001	181.614	0.236366	trehalose-specific PTS enzyme IIBC component
accB	1.37161	0.455873	0.000185469	0.00709108	2.14929	443.932	0.144816	biotin carboxyl carrier protein
sroH	1.28785	0.364965	0.000222145	0.00835411	2.0781	2308.33	0.113773	small RNA SroH
atpG	1.32331	0.404152	0.000229564	0.00856292	2.06738	2206.98	0.12846	ATP synthase F<sub>1</sub> complex subunit &gamma;
plaP	1.37378	0.458147	0.000239332	0.00871473	2.05975	603.699	0.149384	putrescine:H+ symporter PlaP
valT	1.32261	0.403389	0.000238492	0.00871473	2.05975	1.05963e+06	0.128578	tRNA-Val(UAC)
ypdK	1.74312	0.801669	0.000247378	0.00879823	2.0556	68.7755	0.282997	uncharacterized membrane protein YpdK
glnH	1.54722	0.629683	0.000246295	0.00879823	2.0556	454.155	0.216318	L-glutamine ABC transporter periplasmic binding protein
pyrD	1.35915	0.442704	0.000272736	0.00947964	2.02321	402.569	0.145453	dihydroorotate dehydrogenase, type 2
yhdE	1.35434	0.437586	0.000271885	0.00947964	2.02321	383.094	0.143374	nucleoside triphosphate pyrophosphatase YhdE
yigM	1.6079	0.685181	0.00027482	0.00948027	2.02318	156.284	0.240735
ychH	1.33875	0.420889	0.000328632	0.0111686	1.952	1285.67	0.139668	stress-induced protein
insL-1	1.34684	0.429575	0.000341864	0.0114487	1.94124	440.024	0.143826
hslO	1.39369	0.478909	0.000365326	0.0120584	1.91871	271.52	0.164646	molecular chaperone Hsp33
rfbX	1.45651	0.542511	0.000420656	0.0129528	1.88764	575.612	0.19416	polyisoprenol-linked O16-antigen repeat unit flippase
dnaK	1.2943	0.372169	0.000419156	0.0129528	1.88764	8466.1	0.123638	chaperone protein DnaK
potD	1.36362	0.447437	0.000425936	0.013028	1.88512	367.295	0.154532	spermidine preferential ABC transporter periplasmic binding protein
metK	1.35181	0.434897	0.00044075	0.0133918	1.87316	386.806	0.149989	methionine adenosyltransferase
sdaC	1.33163	0.413191	0.000447054	0.013494	1.86986	1474.98	0.140733	L-serine:H+ symporter SdaC
hslV	1.30733	0.386627	0.000450911	0.0135214	1.86898	873.639	0.130641	peptidase component of the HslVU protease
rapA	1.32787	0.409112	0.000505668	0.0148718	1.82764	488.185	0.141689	RNA polymerase-binding ATPase and RNAP recycling factor
rrsA	1.27834	0.354268	0.000514597	0.0149878	1.82426	3669.68	0.119283	16S ribosomal RNA
rfbC	1.51113	0.595633	0.000534041	0.0151246	1.82032	220.905	0.223315	dTDP-4-dehydrorhamnose 3,5-epimerase
hdeA	1.44825	0.534312	0.0005848	0.0159817	1.79638	483.514	0.198973	periplasmic acid stress chaperone HdeA
rrfD	1.39035	0.475446	0.000590381	0.0159817	1.79638	742.868	0.173166	5S ribosomal RNA
miaB	1.33727	0.419294	0.000592174	0.0159817	1.79638	531.45	0.148226	isopentenyl-adenosine A37 tRNA methylthiolase
sibB	1.24785	0.319448	0.000588541	0.0159817	1.79638	7615.87	0.107867	small RNA SibB
thrT	1.31899	0.399429	0.000638176	0.017023	1.76896	523614	0.141281	tRNA-Thr(GGU)
rpsS	1.2266	0.294663	0.000675059	0.0176981	1.75207	8073.97	0.0984023	30S ribosomal subunit protein S19
valS	1.27629	0.35196	0.00069596	0.0177392	1.75106	1456.88	0.1223	valine&mdash;tRNA ligase
codA	1.64232	0.715739	0.00071405	0.0180003	1.74472	68.278	0.288993	cytosine/isoguanine deaminase
speC	1.54557	0.628142	0.000744474	0.018463	1.7337	103.928	0.249784	constitutive ornithine decarboxylase
lysT	1.3163	0.396485	0.000748758	0.0184694	1.73355	184548	0.141749	tRNA-Lys(UUU)
rpsT	1.3138	0.39374	0.000757892	0.0185947	1.73061	22849.1	0.143001	30S ribosomal subunit protein S20
rydC	1.32876	0.410077	0.00081314	0.0196352	1.70697	3070.47	0.150423	small regulatory RNA RydC
glmS	1.26802	0.342581	0.000826667	0.0198573	1.70208	2004.72	0.120847	L-glutamine&mdash;D-fructose-6-phosphate aminotransferase
ygiQ	1.38749	0.47248	0.000921436	0.0214596	1.66838	287.746	0.182439	radical SAM superfamily protein YgiQ
rrfH	1.43772	0.52378	0.000927575	0.0214935	1.66769	706.1	0.207558	5S ribosomal RNA
yqgH	1.57635	0.656584	0.000934067	0.0215352	1.66685	78.797	0.273036	protein YqgH
lysQ	1.32072	0.401322	0.00101565	0.0231201	1.63601	155039	0.150778	tRNA-Lys(UUU)
lysZ	1.31138	0.391082	0.00101346	0.0231201	1.63601	179515	0.145948	tRNA-Lys(UUU)
rluC	1.34634	0.429048	0.00102412	0.0231462	1.63552	317.206	0.164214	23S rRNA pseudouridine<sup>955/2504/2580</sup> synthase
yidC	1.22447	0.292152	0.0010495	0.0236036	1.62702	2587.79	0.102292	membrane protein insertase YidC
mnmA	1.25723	0.330249	0.00105885	0.0236975	1.6253	1027.85	0.119133	tRNA-specific 2-thiouridylase
fadL	1.30636	0.385549	0.00107026	0.0238368	1.62275	367.51	0.144483	long-chain fatty acid outer membrane channel / bacteriophage T2 receptor
groL	1.24343	0.314328	0.00109031	0.0240498	1.61889	5912.16	0.111972	chaperonin GroEL
ybeY	1.33874	0.420871	0.00110362	0.0242269	1.6157	329.586	0.162058	endoribonuclease YbeY
rrsH	1.2769	0.352648	0.00111304	0.0243172	1.61409	3942.81	0.129907	16S ribosomal RNA
rrfE	1.43474	0.520788	0.00113587	0.0246984	1.60733	1007.49	0.2124	5S ribosomal RNA
yhjX	1.60365	0.681357	0.0012132	0.0260101	1.58486	89.4841	0.299013	putative transporter YhjX
yqiB	1.31971	0.40022	0.00127413	0.0270634	1.56762	446.671	0.155198	DUF1249 domain-containing protein YqiB
ydgV	1.35401	0.437237	0.00140437	0.0290236	1.53725	216.303	0.175958
glnA	1.35377	0.43698	0.0014008	0.0290236	1.53725	1859.88	0.176102	adenylyl-[glutamine synthetase] // glutamine synthetase
ycdZ	1.26098	0.334544	0.00146224	0.0300842	1.52166	853.831	0.126075	inner membrane protein YcdZ
prfC	1.33603	0.417951	0.00148715	0.0303246	1.5182	379.166	0.167912	peptide chain release factor RF3
gadE	1.43953	0.525601	0.00150899	0.0306338	1.5138	344.496	0.225675	DNA-binding transcriptional activator GadE
rrsD	1.26773	0.342245	0.00154387	0.0312039	1.50579	2933.44	0.130758	16S ribosomal RNA
pyrI	1.83726	0.877552	0.00158982	0.0317134	1.49876	40.3966	0.42606	aspartate carbamoyltransferase, PyrI subunit
glnL	1.38157	0.466304	0.00164108	0.0323145	1.4906	238.47	0.196641	protein histidine kinase NtrB
lysY	1.29417	0.372031	0.00164018	0.0323145	1.4906	164505	0.146607	tRNA-Lys(UUU)
ydiY	1.52453	0.608362	0.00174041	0.0338659	1.47024	80.2614	0.279794	acid-inducible putative outer membrane protein YdiY
valX	1.2514	0.323541	0.00174201	0.0338659	1.47024	783677	0.12372	tRNA-Val(UAC)
glnG	1.39021	0.475302	0.00183696	0.0354117	1.45085	272.447	0.205613	DNA-binding transcriptional dual regulator NtrC
insL-2	1.28489	0.361643	0.00191465	0.0367549	1.43468	402.842	0.14476
toiL	1.36885	0.452967	0.00194007	0.0370877	1.43077	249.002	0.19504
atpA	1.2514	0.323545	0.00198938	0.0378725	1.42168	4098.73	0.126162	ATP synthase F<sub>1</sub> complex subunit &alpha;
yicG	1.44388	0.529952	0.00203766	0.0383492	1.41624	110.273	0.240897	PF03458 family inner membrane protein YicG
rpsR	1.27984	0.355967	0.00204949	0.0383492	1.41624	940.845	0.14335	30S ribosomal subunit protein S18
rrsG	1.2414	0.311973	0.00206457	0.0383492	1.41624	2658.52	0.121017	16S ribosomal RNA
rsxG	1.50192	0.586803	0.00210922	0.0390206	1.40871	82.1669	0.278368	SoxR [2Fe-2S] reducing system protein RsxG
gpt	1.30086	0.379461	0.00218465	0.0400927	1.39694	330.707	0.157304	xanthine-guanine phsophoribosyltransferase
uhpA	1.51221	0.596663	0.00236728	0.0425924	1.37067	128.594	0.294044	UhpA-Phosphorylated // DNA-binding transcriptional activator UhpA
agrA	1.21905	0.285752	0.00269306	0.0466255	1.33138	1449.89	0.112438	small RNA AgrA
rrsE	1.23907	0.309253	0.00273316	0.0469653	1.32822	3398.73	0.125119	16S ribosomal RNA
rrfF	1.38813	0.473144	0.00290036	0.0494678	1.30568	622.779	0.224122	5S ribosomal RNA
atpB	1.21268	0.2782	0.00295244	0.0499845	1.30116	2790.55	0.110091	ATP synthase F<sub>o</sub> complex subunit a
lacY	0.300444	-1.73483	5.58213e-25	5.12216e-22	21.2905	499.034	0.172889	lactose permease
tyrV	0.474332	-1.07603	3.50507e-21	2.68021e-18	17.5718	368125	0.117636	tRNA-Tyr(GUA)
lacZ	0.459606	-1.12153	1.63646e-20	1.07258e-17	16.9696	2644.6	0.12493	&beta;-galactosidase
rrfB	0.433032	-1.20745	8.4705e-20	4.85783e-17	16.3136	1553.77	0.137389	5S ribosomal RNA
rseA	0.423318	-1.24019	4.55614e-19	2.32262e-16	15.634	1653.37	0.142905	anti-sigma-E factor RseA
lacA	0.312324	-1.67889	7.85342e-17	3.60315e-14	13.4433	436.688	0.210549	galactoside <i>O</i>-acetyltransferase
rpoE	0.467659	-1.09647	1.62167e-12	5.36585e-10	9.27036	2674.82	0.164767	RNA polymerase sigma factor RpoE
yjcZ	0.44681	-1.16227	1.63736e-12	5.36585e-10	9.27036	278.995	0.174732
micL	0.437431	-1.19287	1.57099e-12	5.36585e-10	9.27036	786.112	0.179277	small regulatory RNA MicL-S
yhjJ	0.510506	-0.97	1.82657e-12	5.58687e-10	9.25283	555.704	0.14584	peptidase M16 family protein YhjJ
rseB	0.509461	-0.972957	2.99143e-12	8.57791e-10	9.06662	812.175	0.14792	anti-sigma factor stabilizing protein RseB
ygiM	0.508384	-0.976009	5.91267e-12	1.59572e-09	8.79704	485.511	0.150794	putative signal transduction protein (SH3 domain)
bamE	0.567236	-0.817979	8.61039e-12	2.19469e-09	8.65863	1082.71	0.127149	outer membrane protein assembly factor BamE
raiZ	0.606952	-0.720345	9.52103e-10	1.97926e-07	6.7035	14229.6	0.126169	small RNA RaiZ
cutC	0.475408	-1.07276	1.09166e-09	2.00342e-07	6.69823	671.29	0.191188	PF03932 family protein CutC
raiA	0.642381	-0.638499	2.79167e-09	4.74376e-07	6.32388	32567.8	0.115635	ribosome-associated inhibitor A
flxA	0.491391	-1.02506	4.32204e-09	7.08196e-07	6.14985	791.014	0.190835	Qin prophage; PF14282 family protein FlxA
gnsA	0.649489	-0.622622	4.75586e-09	7.52409e-07	6.12355	984.946	0.114589	putative phosphatidylethanolamine synthesis regulator GnsA
tap	0.572525	-0.804589	3.4094e-08	5.04591e-06	5.29706	549.894	0.160575	methyl-accepting chemotaxis protein Tap
ydhR	0.644727	-0.633241	3.85926e-08	5.53321e-06	5.25702	1778.94	0.125631	putative monooxygenase YdhR
napH	0.64185	-0.639691	4.72957e-08	6.38214e-06	5.19503	575.112	0.127973	ferredoxin-type protein NapH
rseC	0.562995	-0.828805	4.95593e-08	6.49652e-06	5.18732	254.82	0.167581	protein RseC
yobF	0.64161	-0.640231	5.27055e-08	6.71702e-06	5.17282	9900.47	0.128723	DUF2527 domain-containing protein YobF
crfC	0.58023	-0.785303	8.23401e-08	1.02102e-05	4.99097	410.834	0.161972
yfeS	0.455753	-1.13368	8.71709e-08	1.05247e-05	4.97779	129.37	0.236677	PF05406 family protein YfeS
yggN	0.533966	-0.905179	1.41936e-07	1.66975e-05	4.77735	185.897	0.191733	DUF2884 domain-containing protein YggN
cheR	0.537685	-0.895166	1.78512e-07	2.04753e-05	4.68877	206.729	0.191817	chemotaxis protein methyltransferase
uhpU	0.444341	-1.17026	1.85584e-07	2.07673e-05	4.68262	237.098	0.253294	Sigma 28 dependent sRNA
tar	0.617213	-0.69616	2.323e-07	2.47858e-05	4.6058	955.394	0.149456	methyl-accepting chemotaxis protein Tar
uhpT	0.455498	-1.13448	2.50252e-07	2.60945e-05	4.58345	176.176	0.248787	hexose-6-phosphate:phosphate antiporter
micA	0.614338	-0.702896	3.14278e-07	3.13459e-05	4.50382	9233.55	0.153103	small regulatory RNA MicA
ydfZ	0.698021	-0.518657	3.58167e-07	3.42348e-05	4.46553	2297.15	0.111704	putative selenoprotein YdfZ
flgN	0.667994	-0.582092	3.72072e-07	3.48381e-05	4.45795	1045.93	0.126466	flagellar biosynthesis protein FlgN
hupA	0.631363	-0.663459	3.89286e-07	3.57208e-05	4.44708	3739.54	0.145539	DNA-binding protein HU-&alpha;
yfeK	0.443632	-1.17256	4.86891e-07	4.29588e-05	4.36695	102.633	0.264845	DUF5329 domain-containing protein YfeK
cheA	0.638731	-0.64672	5.13559e-07	4.36335e-05	4.36018	676.114	0.143524	chemotaxis protein CheA // chemotaxis protein CheA(S)
yihD	0.593082	-0.753696	5.0885e-07	4.36335e-05	4.36018	834.544	0.168314	DUF1040 domain-containing protein YihD
napB	0.621177	-0.686924	6.14552e-07	5.12648e-05	4.29018	301.594	0.15415	periplasmic nitrate reductase cytochrome c<SUB>550</SUB> protein
rpoH	0.688353	-0.53878	7.89401e-07	6.1386e-05	4.21193	2642.92	0.120684	RNA polymerase sigma factor RpoH
osmE	0.505985	-0.982833	7.8922e-07	6.1386e-05	4.21193	112.783	0.226372	osmotically-inducible lipoprotein OsmE
yhjG	0.59653	-0.745334	8.59374e-07	6.57134e-05	4.18235	333.817	0.170692	AsmA family protein YhjG
flgM	0.656325	-0.607517	1.94924e-06	0.000137586	3.86142	1144.28	0.143782	anti-sigma factor for FliA (&sigma;<sup>28</sup>)
motA	0.605847	-0.722974	2.42171e-06	0.000168346	3.7738	815.917	0.174976	motility protein A
yaiE	0.719359	-0.475216	2.83309e-06	0.000194003	3.71219	1371.08	0.112598
cspC	0.69703	-0.520708	3.33252e-06	0.000224847	3.64811	7175.44	0.12549	transcription antiterminator and regulator of mRNA stability CspC
napA	0.711023	-0.492032	3.44691e-06	0.000229194	3.6398	1790.69	0.118224	periplasmic nitrate reductase subunit NapA
aer	0.53843	-0.89317	4.31453e-06	0.000282786	3.54854	117.256	0.225814	aerotaxis receptor
eptB	0.668834	-0.58028	4.47538e-06	0.000289197	3.53881	511.705	0.143305	phosphoethanolamine transferase EptB
katG	0.67441	-0.568301	5.20955e-06	0.000330933	3.48026	2431.01	0.141508	catalase/hydroperoxidase HPI
aceK-int	0.650876	-0.619545	6.10032e-06	0.00037822	3.42226	647.395	0.156742
yeeX	0.712096	-0.489857	6.73675e-06	0.000412109	3.38499	1582.7	0.122312
nrfA	0.683909	-0.548123	7.50814e-06	0.000453255	3.34366	935.536	0.139078	cytochrome <i>c</i><sub>552</sub> nitrite reductase
yejG	0.611376	-0.709868	1.07595e-05	0.000632881	3.19868	295.264	0.187966	protein YejG
yjaH	0.66636	-0.585626	1.09367e-05	0.000635158	3.19712	1627.73	0.153108	DUF1481 domain-containing protein YjaH
tsr	0.655493	-0.609348	1.31721e-05	0.000736997	3.13253	779.674	0.161957	methyl-accepting chemotaxis protein Tsr
napF	0.682023	-0.552109	1.58955e-05	0.000868196	3.06138	631.783	0.147257	ferredoxin-type protein
aceK	0.689197	-0.537012	1.73628e-05	0.000937185	3.02817	852.634	0.143769	isocitrate dehydrogenase kinase/phosphatase
yfcZ	0.711529	-0.491006	2.48413e-05	0.00129821	2.88665	2918.17	0.133493	DUF406 domain-containing protein YfcZ
serU	0.718754	-0.47643	4.4521e-05	0.0021058	2.67658	90411.2	0.134852	tRNA-Ser(CGA)
motB	0.61451	-0.702492	4.51462e-05	0.00211358	2.67498	414.025	0.207383	motility protein B
nrfB	0.651	-0.61927	4.67191e-05	0.00214347	2.66888	235.261	0.180918	periplasmic nitrite reductase penta-heme <i>c</i>-type cytochrome
fliC	0.668198	-0.581653	4.96806e-05	0.00223466	2.65079	3438.35	0.16817	flagellar filament structural protein
fimB	0.648648	-0.624492	6.46136e-05	0.00282331	2.54924	319.499	0.187758	Type 1 fimbriae regulatory protein FimB
rybB	0.65484	-0.610785	6.68341e-05	0.00289278	2.53868	420.968	0.183751	small regulatory RNA RybB
cheB	0.58106	-0.783242	6.85232e-05	0.00293817	2.53192	154.15	0.242506	CheB-P<SUP>asp</SUP> // protein-glutamate methylesterase/protein glutamine deamidase
motR	0.692176	-0.530789	7.16818e-05	0.00301721	2.52039	602.099	0.158249	Sigma 28 dependent sRNA
rpmI	0.74078	-0.432884	8.49241e-05	0.0035102	2.45467	3504.85	0.127423	50S ribosomal subunit protein L35
fdoG	0.719821	-0.47429	9.50291e-05	0.00385835	2.4136	1607.8	0.142669	formate dehydrogenase O subunit &alpha;
ihfA	0.71702	-0.479915	9.48109e-05	0.00385835	2.4136	746.124	0.144645	integration host factor subunit &alpha;
hns	0.752664	-0.409922	9.92057e-05	0.00399259	2.39874	9679.55	0.121215	DNA-binding transcriptional dual regulator H-NS
pdeH	0.692513	-0.530086	0.000168049	0.00664663	2.1774	765.68	0.170998	c-di-GMP phosphodiesterase PdeH
yohO	0.601773	-0.732708	0.000210329	0.0079751	2.09826	99.5746	0.25179	UPF0387 family protein YohO
kgtP	0.762719	-0.390777	0.000235696	0.00871473	2.05975	1397.55	0.123911	&alpha;-ketoglutarate:H<sup>+</sup> symporter
napG	0.733785	-0.446571	0.000241509	0.00872475	2.05925	372.048	0.145229	ferredoxin-type protein NapG
srlE	0.591365	-0.75788	0.00025934	0.00915269	2.03845	95.8323	0.268041	sorbitol-specific PTS enzyme IIBC<sub>1</sub> component
cpxP	0.734128	-0.445896	0.000284957	0.00975659	2.0107	912.05	0.147449	periplasmic protein CpxP
cheY	0.592348	-0.755483	0.000341221	0.0114487	1.94124	82.9171	0.277084	CheY-acetylated // CheY-P<sup>asp</sup> // chemotaxis protein CheY
fliD	0.750175	-0.414702	0.000348211	0.0115767	1.93641	745.775	0.138329	flagellar filament capping protein
udp	0.779986	-0.358481	0.000371891	0.012101	1.91718	3439.92	0.116977	uridine phosphorylase
yeaO	0.630027	-0.666515	0.000369625	0.012101	1.91718	118.753	0.242419	DUF488 domain-containing protein YeaO
uspA	0.763864	-0.388612	0.000377204	0.0121874	1.91409	951.517	0.129001	universal stress protein A
cheZ	0.615819	-0.699422	0.000389835	0.0125074	1.90283	155.267	0.258867	chemotaxis protein CheZ
clpA	0.759319	-0.397223	0.000393506	0.0125375	1.90179	1771.16	0.133052	ATP-dependent Clp protease ATP-binding subunit ClpA
yqhA	0.694767	-0.525398	0.000397024	0.0125624	1.90093	341.833	0.185944	UPF0114 family protein YqhA
modA	0.716467	-0.481029	0.000406769	0.0127826	1.89338	301.573	0.16795	molybdate ABC transporter periplasmic binding protein
flhC	0.750661	-0.413766	0.000420139	0.0129528	1.88764	585.49	0.140621	DNA-binding transcriptional dual regulator FlhC
fkpA	0.715366	-0.483247	0.000469818	0.0139969	1.85397	2123.8	0.171712	peptidyl-prolyl <i>cis-trans</i> isomerase FkpA
fimA	0.624888	-0.678331	0.000492517	0.0145785	1.83629	120.542	0.257107	type 1 fimbriae major subunit
bepA	0.708553	-0.497053	0.000522321	0.0149878	1.82426	241.093	0.179665	&beta;-barrel assembly-enhancing protease
hdfR	0.693966	-0.527063	0.000518769	0.0149878	1.82426	269.396	0.192695	DNA-binding transcriptional dual regulator HdfR
rof	0.636001	-0.652898	0.000522677	0.0149878	1.82426	100.989	0.247724	modulator of Rho-dependent transcription termination
tabA	0.713722	-0.486566	0.000528087	0.0150488	1.8225	287.486	0.175469	DUF386 domain-containing toxin-antitoxin biofilm protein TabA
ivy	0.584558	-0.774583	0.000544939	0.0153385	1.81422	61.3046	0.303474	periplasmic chaperone, inhibitor of vertebrate C-type lysozyme
flgL	0.784837	-0.349536	0.000566671	0.015662	1.80515	957.29	0.118821	flagellar hook-filament junction protein 2
crp	0.784181	-0.350742	0.000564516	0.015662	1.80515	2337.74	0.119353	DNA-binding transcriptional dual regulator CRP
yibT	0.630646	-0.665097	0.000562283	0.015662	1.80515	105.535	0.255885	protein YibT
feoB	0.712742	-0.488548	0.000614952	0.0164994	1.78253	406.634	0.17987	Fe<sup>2+</sup> transporter FeoB
cca	0.732382	-0.449332	0.000674474	0.0176981	1.75207	420.65	0.164441	fused CCA tRNA nucleotidyltransferase/phosphohydrolase
cyoE	0.729387	-0.455243	0.000671795	0.0176981	1.75207	346.702	0.167078	heme O synthase
napD	0.749944	-0.415145	0.000695254	0.0177392	1.75106	477.708	0.149942	NapA signal peptide-binding chaperone NapD
msrC	0.741911	-0.430682	0.000693456	0.0177392	1.75106	313.457	0.156662	free methionine-(<i>R</i>)-sulfoxide reductase
yijD	0.737896	-0.438512	0.000688185	0.0177392	1.75106	403.695	0.160042	DUF1422 domain-containing inner membrane protein YijD
ykgF	0.692573	-0.529963	0.000684933	0.0177392	1.75106	214.666	0.201331	putative amino acid dehydrogenase with NAD(P)-binding domain and ferridoxin-like domain
mmuM	0.596246	-0.746019	0.000700216	0.0177491	1.75082	67.7537	0.303737	CP4-6 prophage; homocysteine <i>S</i>-methyltransferase
msrB	0.775184	-0.367389	0.000721104	0.0180788	1.74283	612.485	0.129622	methionine sulfoxide reductase B
degP	0.709366	-0.495397	0.00073481	0.0183223	1.73702	367.657	0.18742	periplasmic serine endoprotease DegP
can	0.765122	-0.386239	0.000791599	0.0193184	1.71403	513.303	0.139369	carbonic anhydrase 2
ybaQ	0.746196	-0.422374	0.000796787	0.0193421	1.7135	419.268	0.155822	DNA-binding transcriptional regulator YbaQ
ybjC	0.735978	-0.442265	0.000843942	0.0201667	1.69537	256.468	0.166105	DUF1418 domain-containing protein YbjC
infC	0.817901	-0.290002	0.000856202	0.0202603	1.69335	8211.42	0.0998987	translation initiation factor IF-3
bamD	0.790368	-0.339404	0.000865522	0.0202603	1.69335	1416.74	0.120537	outer membrane protein assembly factor BamD
gatZ	0.774123	-0.369365	0.000857663	0.0202603	1.69335	2381.57	0.133527	putative tagatose-1,6-bisphosphate aldolase 2 chaperone
yncL	0.650945	-0.619393	0.000865019	0.0202603	1.69335	104.409	0.251804	uncharacterized protein YncL
ydhZ	0.723386	-0.467161	0.00101793	0.0231201	1.63601	224.017	0.182785
rpmF	0.808136	-0.30733	0.00108097	0.0239589	1.62053	3776.32	0.109331	50S ribosomal subunit protein L32
cheW	0.678362	-0.559873	0.00114387	0.024755	1.60634	208.263	0.233762	chemotaxis protein CheW
glpK	0.786279	-0.346887	0.0011774	0.0253611	1.59583	988.849	0.128419	glycerol kinase
fliS	0.728243	-0.457508	0.00127119	0.0270634	1.56762	205.118	0.184003	flagellar biosynthesis protein FliS
yhcB	0.791118	-0.338035	0.00130062	0.0274988	1.56069	1176.57	0.126026
yebZ	0.69953	-0.515542	0.00132555	0.0278974	1.55444	140.868	0.215209	CopD family protein
gatC	0.774974	-0.367781	0.00134263	0.0281278	1.55086	1154.37	0.140642	galactitol-specific PTS enzyme IIC component
luxS	0.780196	-0.358092	0.00134952	0.0281436	1.55062	1053.23	0.136004	<i>S</i>-ribosylhomocysteine lyase
sixA	0.705796	-0.502677	0.0014818	0.0303246	1.5182	202.609	0.213055	phosphohistidine phosphatase SixA
tpx	0.785727	-0.347901	0.00157201	0.031495	1.50176	895.517	0.133954	lipid hydroperoxide peroxidase
ybaA	0.639422	-0.645159	0.00157182	0.031495	1.50176	70.9139	0.294678	DUF1428 domain-containing protein YbaA
yedD	0.724793	-0.464359	0.00160393	0.0318563	1.4968	163.677	0.194801	lipoprotein YedD
rpmE	0.784298	-0.350526	0.00171825	0.0336894	1.47251	1762.11	0.136822	50S ribosomal subunit protein L31
fau	0.771316	-0.374605	0.00179933	0.0348325	1.45802	1092.95	0.150295	putative 5-formyltetrahydrofolate cyclo-ligase
yeiQ	0.740777	-0.432889	0.00202039	0.0383038	1.41676	305.999	0.184974	putative oxidoreductase YeiQ
lpxT	0.725677	-0.462601	0.00205889	0.0383492	1.41624	224.465	0.203112	lipid A-core phosphotransferase
yjdP	0.483639	-1.048	0.00205915	0.0383492	1.41624	20.609	0.566054	protein YjdP
fliT	0.760764	-0.39448	0.00218198	0.0400927	1.39694	277.14	0.165978	flagellar biosynthesis protein FliT
ykgE	0.674305	-0.568527	0.00221531	0.0404935	1.39262	99.0315	0.270444	putative lactate utilization oxidoreductase YkgE
yehD	0.722262	-0.469406	0.00222668	0.0405397	1.39212	182.682	0.21016	putative fimbrial protein YehD
cyaY	0.708026	-0.498125	0.00227966	0.0413402	1.38363	121.048	0.228437	frataxin CyaY
nrfC	0.713189	-0.487643	0.00236205	0.0425924	1.37067	133.14	0.222689	putative menaquinol-cytochrome <i>c</i> reductase 4Fe-4S subunit
trxA	0.819758	-0.286731	0.00238638	0.0427685	1.36888	2601.89	0.111146	oxidized thioredoxin // thioredoxin 1
mgsA	0.800378	-0.321247	0.00246781	0.0438849	1.35768	1884.65	0.129223	methylglyoxal synthase
ydcY	0.798886	-0.323938	0.00246494	0.0438849	1.35768	1423.77	0.130616	DUF2526 domain-containing protein YdcY
cybB	0.678572	-0.559427	0.002527	0.0447641	1.34907	82.1314	0.272949	superoxide oxidase
ssrA	0.812512	-0.299538	0.002551	0.0450154	1.34664	95685.5	0.112352	tmRNA
dhaM	0.810181	-0.303683	0.00258232	0.0453934	1.34301	1385.13	0.120763	dihydroxyacetone kinase subunit M
ycfP	0.7706	-0.375945	0.00261378	0.045771	1.33941	692.901	0.160405	PF05728 family protein YcfP
flgK	0.819626	-0.286962	0.00266429	0.0463021	1.3344	1333.17	0.113004	flagellar hook-filament junction protein 1
tdcD	0.706184	-0.501883	0.00266351	0.0463021	1.3344	232.784	0.239309	propionate kinase
nrfD	0.699509	-0.515585	0.00272562	0.0469653	1.32822	108.873	0.2484	putative menaquinol-cytochrome <i>c</i> reductase subunit NrfD
bluF	0.642413	-0.638426	0.00284383	0.0486847	1.31261	59.4403	0.336836	blue light- and temperature-regulated antirepressor BluF
tesA	0.634161	-0.657078	0.00291721	0.049571	1.30477	69.4388	0.355141	multifunctional acyl-CoA thioesterase I and protease I and lysophospholipase L1
codB	1.75377	0.810459	0.00305749	0.0514135	1.28892	49.319	0.475942	cytosine transporter
ccmA	0.792064	-0.33631	0.00307047	0.0514135	1.28892	545.672	0.142217	cytochrome <i>c</i> maturation protein A
yaeP	0.732525	-0.449049	0.00306194	0.0514135	1.28892	196.91	0.211114	PF06786 family protein YaeP
ybfA	1.32113	0.401772	0.00310577	0.0518155	1.28554	1100.22	0.181453	DUF2517 domain-containing protein YbfA
gatD	0.792098	-0.336249	0.00323291	0.0535473	1.27126	522.447	0.143399	galactitol-1-phosphate 5-dehydrogenase
hypD_AS	0.711274	-0.491523	0.00323096	0.0535473	1.27126	167.27	0.243364
modB	0.71182	-0.490417	0.00325451	0.0537111	1.26994	118.563	0.242823	molybdate ABC transporter membrane subunit
modC	0.706236	-0.501778	0.00340284	0.0559577	1.25214	105.015	0.252999	molybdate ABC transporter ATP binding subunit
trg	0.699863	-0.514856	0.00350516	0.0574345	1.24083	156.123	0.265966	methyl-accepting chemotaxis protein Trg
rng	1.22556	0.293437	0.00355018	0.0579652	1.23683	879.326	0.121404	RNase G
waaS	1.35904	0.442591	0.00357962	0.0582387	1.23479	228.441	0.214119	lipopolysaccharide core biosynthesis protein WaaS
pitA	1.19473	0.256683	0.00360767	0.0584877	1.23294	2835.67	0.102359	metal phosphate:H<sup>+</sup> symporter PitA
ccmD	0.665697	-0.587063	0.00373321	0.0603097	1.21961	78.8661	0.326294	cytochrome <i>c</i> maturation protein D
glpD	0.829302	-0.270031	0.00378577	0.0609442	1.21507	4280.1	0.110225	aerobic glycerol 3-phosphate dehydrogenase
mfd	1.22659	0.294656	0.00384016	0.0616037	1.21039	764.577	0.123642	transcription-repair coupling factor
pcnB	1.22771	0.295969	0.00394825	0.0628978	1.20136	813.801	0.12484	poly(A) polymerase I
dnaE	1.20511	0.269162	0.00394506	0.0628978	1.20136	1695.47	0.110655	DNA polymerase III subunit &alpha;
rlmL	1.25888	0.332136	0.00401666	0.0635463	1.19691	346.348	0.146474	fused 23S rRNA m<sup>2</sup>G2445 methyltransferase and 23S rRNA m<sup>7</sup>G2069 methyltransferase
lnt	1.25052	0.322523	0.0040143	0.0635463	1.19691	460.122	0.140723	apolipoprotein <i>N</i>-acyltransferase
gadX	1.33079	0.412288	0.00421257	0.0661892	1.17921	170.568	0.200641	DNA-binding transcriptional dual regulator GadX
miaA	1.20468	0.26865	0.00420435	0.0661892	1.17921	1450.87	0.111136	tRNA dimethylallyltransferase
pyrH	1.27207	0.34718	0.00423536	0.0663203	1.17835	323.308	0.1574	UMP kinase
gatR_2	0.719608	-0.474716	0.00430567	0.0671919	1.17268	144.08	0.248171
tdcE	0.765282	-0.385937	0.00439697	0.0683841	1.16504	190.191	0.184599	activated 2-ketobutyrate formate-lyase / pyruvate formate-lyase 4 // 2-ketobutyrate formate-lyase/pyruvate formate-lyase 4
sroD	1.42231	0.508238	0.00444515	0.0686679	1.16325	91.8948	0.276552
rrsC	1.23396	0.3033	0.00443477	0.0686679	1.16325	3403.8	0.131953	16S ribosomal RNA
ppiC	0.798944	-0.323834	0.00448609	0.0690677	1.16073	490.844	0.14463	peptidyl-prolyl <i>cis-trans</i> isomerase C
ycgI	6.24486	2.64267	0.00459884	0.0705668	1.1514	4.72149	1.5391	protein YcgI
tusA	1.33358	0.415302	0.00466706	0.0713748	1.14645	156.233	0.208157	sulfur transfer protein TusA
recF	1.26222	0.335963	0.00475527	0.0724823	1.13977	489.894	0.153751	recombination mediator protein RecF
gadF	1.38081	0.465515	0.0050094	0.0760239	1.11905	117.56	0.252215	small regulatory RNA GadF
rnd	1.27798	0.353869	0.00505256	0.0760239	1.11905	236.693	0.167691	RNase D
rrsB	1.22169	0.288875	0.0050539	0.0760239	1.11905	3613.13	0.128052	16S ribosomal RNA
manY	0.818846	-0.288336	0.00503344	0.0760239	1.11905	899.98	0.12579	mannose-specific PTS enzyme IIC component
trmA	1.255	0.327687	0.00508985	0.0763144	1.11739	402.682	0.150585	tRNA m<sup>5</sup>U54 methyltransferase
ghrA	1.47284	0.558596	0.00511381	0.0764239	1.11677	59.5457	0.338059	glyoxylate/hydroxypyruvate reductase A
ihfB	0.822668	-0.281618	0.00517954	0.0771549	1.11264	869.209	0.122621	integration host factor subunit &beta;
obgE	1.2589	0.33216	0.00531618	0.0789341	1.10274	332.914	0.154853	GTPase ObgE
fdoI	0.799532	-0.322771	0.00542704	0.0803202	1.09518	493.099	0.149403	formate dehydrogenase O subunit &gamma;
yjiL	0.638969	-0.646181	0.00547202	0.0807255	1.09299	39.744	0.449008	putative ATPase, activator of (R)-hydroxyglutaryl-CoA dehdratase
accD	1.20696	0.271372	0.0055116	0.0810488	1.09125	1287.8	0.117879	acetyl-CoA carboxyltransferase subunit &beta;
sibE	1.22226	0.289546	0.00556041	0.0815054	1.08881	2547.32	0.129075	small RNA SibE
wecE	1.26088	0.334434	0.00560035	0.0818293	1.08709	345.426	0.1582	dTDP-4-dehydro-6-deoxy-D-glucose transaminase
epmC	1.28334	0.359907	0.00565172	0.0823177	1.08451	248.551	0.176257	EF-P-Lys34 hydroxylase
aroC	1.27101	0.34597	0.00575207	0.0835142	1.07824	290.946	0.166939	chorismate synthase
lysU	1.23671	0.306507	0.00581456	0.0841552	1.07492	978.648	0.140651	lysine&mdash;tRNA ligase/Ap<sub>4</sub>A synthetase/Ap<sub>3</sub>A synthetase
ibpB	1.24786	0.319453	0.0059369	0.0856556	1.06724	419.741	0.149888	small heat shock protein IbpB
hdeB	1.37238	0.456684	0.00614357	0.0883595	1.05375	294.748	0.262414	periplasmic acid stress chaperone HdeB
osmC	0.624271	-0.679755	0.00620582	0.0889759	1.05073	33.8731	0.538931	osmotically inducible peroxiredoxin OsmC
agrB	1.23162	0.300562	0.00646978	0.0924715	1.03399	414.839	0.139949	small regulatory RNA AgrB
waaB	1.31335	0.393249	0.00651461	0.0926733	1.03305	334.846	0.209746	UDP-D-galactose:(glucosyl)lipopolysaccharide-1,6-D-galactosyltransferase
rpmJ	0.840124	-0.251326	0.0065243	0.0926733	1.03305	4637.19	0.109771	50S ribosomal subunit protein L36
rplA	1.24613	0.317455	0.00660427	0.0935197	1.0291	2939.66	0.151549	50S ribosomal subunit protein L1
mntS	1.20131	0.26461	0.00677503	0.0956426	1.01935	965.747	0.118342	small protein MntS
atpI	1.19343	0.255109	0.0069876	0.0983408	1.00727	1435.16	0.11325	ATP synthase accessory factor AtpI
srlA	0.798391	-0.324832	0.00701093	0.0983674	1.00715	349.102	0.159752	sorbitol-specific PTS enzyme IIC<sub>2</sub> component
csrC	1.22255	0.289892	0.00707099	0.0989077	1.00477	2139.63	0.135584	small regulatory RNA CsrC
fis	1.23575	0.305387	0.00714545	0.0993434	1.00286	426.466	0.14627	DNA-binding transcriptional dual regulator Fis
panZ	0.662229	-0.594598	0.00713205	0.0993434	1.00286	46.3434	0.458469	acetyl-CoA-bound PanD maturation factor // PanD maturation factor
rffG	1.23688	0.306708	0.00736038	0.0994643	1.00233	423.325	0.148046	dTDP-glucose 4,6-dehydratase 2
tpke11	1.23437	0.303773	0.00723555	0.0994643	1.00233	596.826	0.145578
sdaB	1.22378	0.291343	0.0073267	0.0994643	1.00233	705.506	0.137501	L-serine deaminase II
rplY	1.18379	0.243414	0.00729976	0.0994643	1.00233	1573.81	0.107047	50S ribosomal subunit protein L25
tauC	1.03385	0.0480203	0.00737094	0.0994643	1.00233	2.17314	0.188753	taurine ABC transporter membrane subunit
rdoA	0.828107	-0.272112	0.00734638	0.0994643	1.00233	860.654	0.125025
ccmF	0.810325	-0.303427	0.00735575	0.0994643	1.00233	406.747	0.146109	holocytochrome <I>c</I> synthase CcmF component
ybjN	0.797385	-0.326651	0.00725139	0.0994643	1.00233	1017.89	0.162391	protein YbjN
cfa	0.795349	-0.330341	0.00722571	0.0994643	1.00233	378.288	0.164781	cyclopropane fatty acyl phospholipid synthase
hcr	0.69141	-0.532386	0.0072555	0.0994643	1.00233	78.8611	0.370831	NADH oxidoreductase
rpsH	1.22908	0.297577	0.00744771	0.100206	0.999108	3561.17	0.142384	30S ribosomal subunit protein S8
rplT	0.834144	-0.261631	0.00772274	0.103602	0.984631	9402.57	0.120503	50S ribosomal subunit protein L20
hupB	0.827108	-0.273852	0.00777719	0.104028	0.982848	2069.01	0.127576	DNA-binding protein HU-&beta;
sdhD	0.888711	-0.170213	0.00781233	0.104195	0.982155	10.1734	0.311166	succinate:quinone oxidoreductase, membrane protein SdhD
ves	0.725381	-0.46319	0.00783565	0.104203	0.98212	102.983	0.298897	HutD family protein Ves
dmsB	1.26739	0.341863	0.00788055	0.104497	0.980896	237.982	0.177248	dimethyl sulfoxide reductase subunit B
tdcA	1.25988	0.333282	0.00796427	0.105303	0.97756	740.484	0.171036	DNA-binding transcriptional activator TdcA
wbbH	1.26308	0.336949	0.00802662	0.10548	0.976828	623.203	0.174665	putative O-antigen polymerase
rplI	1.25074	0.322781	0.00800754	0.10548	0.976828	1908.04	0.163087	50S ribosomal subunit protein L9
yehT	0.764705	-0.387025	0.00804667	0.10548	0.976828	151.783	0.218491
gltX	1.21942	0.286197	0.00808822	0.105723	0.975831	983.048	0.13688	glutamate&mdash;tRNA ligase
bfd	1.43862	0.52469	0.00830671	0.10827	0.96549	47.313	0.385283	bacterioferritin-associated ferredoxin
hybB	0.810533	-0.303056	0.00863423	0.112221	0.949927	321.035	0.151417	hydrogenase 2 membrane subunit
yecR	0.815388	-0.294441	0.00868176	0.11252	0.948772	766.778	0.14522	lipoprotein YecR
cyoA	0.803474	-0.315678	0.00878158	0.113493	0.945032	524.296	0.161191	cytochrome <i>bo</i><sub>3</sub> subunit 2
rep	1.24372	0.314662	0.00885017	0.114058	0.942875	246.584	0.160714	ATP-dependent DNA helicase Rep
adk	1.21203	0.27742	0.0089711	0.11497	0.939414	860.607	0.13385	adenylate kinase
sra	0.765444	-0.385631	0.00896354	0.11497	0.939414	120.061	0.22494	ribosome-associated protein Sra
uvrA	1.23057	0.299325	0.00908846	0.115827	0.936189	455.465	0.149996	UvrABC excision nuclease subunit A
mcrA	0.727393	-0.459193	0.00907761	0.115827	0.936189	64.3974	0.314544	e14 prophage; Type IV methyl-directed restriction enzyme EcoKMcrA
fabR	0.817214	-0.291213	0.00926269	0.117721	0.929147	939.567	0.145037	DNA-binding transcriptional repressor FabR
ybbN	1.22656	0.294618	0.00935195	0.118527	0.926183	387.649	0.147533
treA	0.726762	-0.460445	0.00940694	0.118895	0.924835	80.4328	0.320502	periplasmic trehalase
hybO	0.833921	-0.262017	0.00944297	0.119023	0.92437	799.709	0.124738	hydrogenase 2 small subunit
xapB	0.677909	-0.560836	0.00947494	0.119099	0.924093	29.4256	0.554977	xanthosine:H+ symporter XapB
thrV	1.23946	0.309711	0.00955798	0.119327	0.923261	891277	0.143224	tRNA-Thr(GGU)
rpsN	1.22393	0.291519	0.00956757	0.119327	0.923261	2034.14	0.14633	30S ribosomal subunit protein S14
napC	0.832451	-0.264563	0.00960405	0.119327	0.923261	871.491	0.127298	periplasmic nitrate reductase cytochrome c protein
ptrA	0.827256	-0.273594	0.00962315	0.119327	0.923261	486.156	0.133446	protease 3
yehA	0.669447	-0.578957	0.00960225	0.119327	0.923261	20.3831	1.07724	putative fimbrial adhesin YehA
wcaK	0.952162	-0.0707217	0.00990019	0.122102	0.913276	4.48966	0.199656	colanic acid biosynthesis pyruvyl transferase WcaK
ccmE	0.762347	-0.39148	0.00989599	0.122102	0.913276	107.444	0.240282	periplasmic heme chaperone
ygeQ	0.761635	-0.392829	0.0100958	0.124181	0.905945	118.758	0.243631	putative lipoprotein YgeQ
glmY	1.2023	0.265801	0.0101299	0.124267	0.905644	8922.15	0.129632	small regulatory RNA GlmY
ygbA	0.684343	-0.547209	0.0101626	0.124336	0.905402	48.8653	0.582318	protein YgbA
yhbY	1.19041	0.251454	0.0102722	0.125343	0.9019	2657.97	0.119903	ribosome assembly factor YhbY
dcuS	1.22214	0.289412	0.0103585	0.12606	0.899421	425.42	0.147421	DcuS-<i>N</i>-phospho-L-histidine // sensor histidine kinase DcuS
glpB	0.854091	-0.227537	0.0104757	0.12715	0.895685	4392.81	0.104993	anaerobic glycerol-3-phosphate dehydrogenase subunit B
holC	1.26067	0.334191	0.01054	0.127592	0.894175	201.126	0.186297	DNA polymerase III subunit &chi;
hslU	1.20855	0.273278	0.0105787	0.127724	0.893726	1622.58	0.135556	ATPase component of the HslVU protease
speD	1.26758	0.342073	0.0106189	0.127872	0.893223	245.106	0.193793	<i>S</i>-adenosylmethionine decarboxylase proenzyme // &beta; cleavage product of SpeD // &alpha; cleavage product of SpeD
pliG	0.734314	-0.445531	0.0107469	0.129076	0.889155	75.7956	0.326269	inhibitor of g-type lysozyme
stpA	0.824359	-0.278656	0.0108198	0.129612	0.887355	700.188	0.140971	DNA-binding transcriptional repressor StpA with RNA chaperone activity
ebgR	1.19863	0.261392	0.010893	0.130149	0.88556	543.021	0.128344	DNA-binding transcriptional repressor EbgR
yffB	0.712402	-0.489236	0.0110379	0.131537	0.880951	41.1189	0.436061	putative reductase YffB
waaL	1.20458	0.268531	0.011078	0.131673	0.880503	928.827	0.133746	O-antigen ligase
uspE	0.8339	-0.262053	0.0111715	0.132442	0.877974	805.297	0.129651	universal stress protein E
cedA	0.745797	-0.423144	0.0112796	0.133378	0.874916	72.2385	0.300936	cell division modulator
rsxD	1.26984	0.344645	0.0113767	0.13418	0.872312	152.854	0.201354	SoxR [2Fe-2S] reducing system protein RsxD
groS	1.17052	0.227147	0.0114972	0.135254	0.868849	2443.99	0.106606	cochaperonin GroES
exbB	0.846847	-0.239827	0.0116678	0.13691	0.863566	1392.77	0.115626	Ton complex subunit ExbB
guaC	1.2062	0.270474	0.0118771	0.139011	0.856952	449.702	0.137709	GMP reductase
fabA	0.83607	-0.258305	0.0122881	0.143455	0.843285	794.701	0.129838	&beta;-hydroxyacyl-acyl carrier protein dehydratase/isomerase
rrfC	1.26361	0.337549	0.0123488	0.143702	0.842537	690.655	0.19971	5S ribosomal RNA
atpD	1.20148	0.264816	0.0124659	0.143702	0.842537	2653.09	0.134874	ATP synthase F<sub>1</sub> complex subunit &beta;
rpoD	1.17867	0.237163	0.0124041	0.143702	0.842537	1316.53	0.11507	RNA polymerase sigma factor RpoD
atpF	1.1677	0.223673	0.012441	0.143702	0.842537	2924.41	0.10606	ATP synthase F<sub>o</sub> complex subunit b
atpE	1.15972	0.213773	0.0124112	0.143702	0.842537	2274.16	0.0998219	ATP synthase F<sub>o</sub> complex subunit c
ychF	1.215	0.280952	0.0127102	0.145786	0.836283	493.753	0.148392	redox-responsive ATPase YchF
frwB	0.894277	-0.161207	0.0126895	0.145786	0.836283	12.0379	0.290056	putative PTS enzyme IIB component FrwB
clpS	0.828118	-0.272092	0.0127709	0.146117	0.835298	550.842	0.141703	specificity factor for ClpA-ClpP chaperone-protease complex
yfhR	1.33978	0.421995	0.0129716	0.147644	0.830785	57.5543	0.327553	putative peptidase
truD	1.21749	0.283914	0.0130018	0.147644	0.830785	352.105	0.151727	tRNA pseudouridine<sup>13</sup> synthase
ygiN	0.856142	-0.224079	0.0130331	0.147644	0.830785	1267.15	0.107581	putative quinol monooxygenase YgiN
waaZ	0.819671	-0.286884	0.012966	0.147644	0.830785	339.131	0.154805	lipopolysaccharide core biosynthesis protein WaaZ
insL-3	1.21159	0.276896	0.0135256	0.152846	0.815745	411.342	0.147786
rpmA	0.846345	-0.240682	0.0136383	0.15374	0.813212	5209.5	0.120146	50S ribosomal subunit protein L27
argS	1.20994	0.27493	0.0136976	0.153831	0.812955	562.162	0.146595	arginine&mdash;tRNA ligase
yadH	0.776691	-0.364587	0.0137134	0.153831	0.812955	97.8241	0.243114	putative ABC transporter membrane subunit YadH
yfcC	1.21427	0.280091	0.0137873	0.154284	0.81168	640.744	0.151001	putative transporter YfcC
alsA	0.875166	-0.192371	0.0139467	0.155688	0.807746	16.2363	0.342554	D-allose ABC transporter ATP binding subunit
eutR	1.33095	0.412459	0.0141125	0.156397	0.805772	25.3165	0.752635	putative DNA-binding transcriptional regulator EutR
lysW	1.22555	0.293426	0.0140733	0.156397	0.805772	252497	0.163607	tRNA-Lys(UUU)
hemB	0.8355	-0.259288	0.0140861	0.156397	0.805772	545.522	0.135119	porphobilinogen synthase
ryhB	1.31845	0.398848	0.0141499	0.156433	0.805672	171.006	0.308629	small regulatory RNA RyhB
yebY	0.784306	-0.350512	0.0141993	0.156602	0.805203	165.092	0.228716	DUF2511 domain-containing protein YebY
cysD	1.05294	0.074423	0.0142726	0.156658	0.805049	4.44249	0.201358	sulfate adenylyltransferase subunit 2
bolA	0.836339	-0.257841	0.0142664	0.156658	0.805049	570.946	0.134554	DNA binding transcriptional dual regulator BolA-phosphorylated // DNA-binding transcriptional dual regulator BolA
gpmA	0.834799	-0.2605	0.0143793	0.157452	0.802853	846.095	0.136809	2,3-bisphosphoglycerate-dependent phosphoglycerate mutase
cysZ	1.3105	0.390119	0.0144453	0.157746	0.802041	85.978	0.291337	sulfate:H+ symporter
bioB	1.14725	0.198174	0.014475	0.157746	0.802041	23.5155	0.353596	biotin synthase
galK	0.816171	-0.293056	0.0145298	0.157969	0.801429	231.368	0.165515	galactokinase
fruB	0.851559	-0.231821	0.0146179	0.158177	0.800856	2229.68	0.115704	FruB - his299 phosphorylated // fructose-specific PTS multiphosphoryl transfer protein FruB
ilvL	0.845108	-0.242793	0.0145945	0.158177	0.800856	2204.02	0.123553	<i>ilvXGMEDA</i> operon leader peptide
lpxK	1.22423	0.29187	0.0148888	0.160729	0.793906	241.224	0.165553	tetraacyldisaccharide 4'-kinase
ydeE	0.84672	-0.240043	0.0152062	0.16377	0.785766	18.2604	0.448822	dipeptide exporter
rfbD	1.24725	0.318755	0.0152534	0.163894	0.785438	314.752	0.195374	dTDP-4-dehydrorhamnose reductase
prmB	1.20586	0.270058	0.0153789	0.164856	0.782896	441.384	0.147223	ribosomal protein L3 <i>N</i><sup>5</sup>-glutamine methyltransferase
aegA	0.829254	-0.270114	0.0154865	0.16544	0.781359	399.453	0.148085	putative oxidoreductase AegA
yjdM	0.806178	-0.31083	0.0155055	0.16544	0.781359	197.638	0.188386	zinc ribbon domain-containing protein YjdM
gntU	1.25571	0.328509	0.0155662	0.165702	0.780672	183.756	0.208498	low-affinity gluconate transporter
uhpB	1.30672	0.385947	0.015888	0.168531	0.77332	80.0213	0.310143	sensory histidine kinase UhpB - phosphorylated // sensory histidine kinase UhpB
ndk	1.3039	0.382832	0.0159054	0.168531	0.77332	124.116	0.299874	nucleoside diphosphate kinase
recQ	1.21892	0.285599	0.0160128	0.168889	0.772399	279.332	0.163118	ATP-dependent DNA helicase RecQ
patZ	0.841763	-0.248513	0.0159983	0.168889	0.772399	508.557	0.130847	peptidyl-lysine <i>N</i>-acetyltransferase
tig	1.16811	0.224176	0.0161229	0.169272	0.771416	4386.94	0.110417	trigger factor
ppc	0.830144	-0.268567	0.0160976	0.169272	0.771416	713.386	0.149034	phosphoenolpyruvate carboxylase
opgB	1.18989	0.250833	0.0162139	0.169839	0.769962	562.683	0.133111	phosphoglycerol transferase II // phosphoglycerol transferase I
maa	0.808726	-0.306278	0.0164172	0.171576	0.765543	372.666	0.187003	maltose <i>O</i>-acetyltransferase
ybjM	1.27409	0.349471	0.0165175	0.172232	0.763885	99.6548	0.244758	putative inner membrane protein
pheP	1.21537	0.281396	0.0166114	0.172382	0.763508	305.231	0.161375	phenylalanine:H+ symporter PheP
rluB	1.20684	0.271234	0.0165832	0.172382	0.763508	414.47	0.151705	23S rRNA pseudouridine<sup>2605</sup> synthase
srlD	0.768876	-0.379177	0.0166446	0.172382	0.763508	75.6775	0.305692	sorbitol-6-phosphate 2-dehydrogenase
focA	1.14594	0.196525	0.0169052	0.174687	0.757738	6207.65	0.0952706	formate channel FocA
tolB	1.1795	0.238178	0.0171212	0.176521	0.753203	813.995	0.124856	Tol-Pal system periplasmic protein TolB
rrfA	1.21182	0.27718	0.0173298	0.178272	0.748918	941.887	0.159493	5S ribosomal RNA
glf	1.21012	0.275155	0.0175326	0.179553	0.745808	676.216	0.158159	UDP-galactopyranose mutase
flgC	0.83904	-0.253189	0.0175107	0.179553	0.745808	698.309	0.138157	flagellar basal-body rod protein FlgC
yfcA	1.24696	0.318417	0.0177112	0.180549	0.743406	133.324	0.208059	putative transporter YfcA
topA	1.17187	0.228813	0.0177843	0.180549	0.743406	1298.04	0.118887	DNA topoisomerase 1
nuoA	0.850301	-0.233955	0.0177873	0.180549	0.743406	692.003	0.122897	NADH:quinone oxidoreductase subunit A
uxaB	0.780789	-0.356995	0.0176985	0.180549	0.743406	95.321	0.271625	tagaturonate reductase
valU	1.18452	0.244308	0.0179327	0.181623	0.740828	813971	0.131255	tRNA-Val(UAC)
slp	1.30622	0.385403	0.0180464	0.1819	0.740167	67.6832	0.368014	starvation lipoprotein
rfbB	1.20193	0.265358	0.0180435	0.1819	0.740167	503.344	0.15019	dTDP-glucose 4,6-dehydratase 1
hcaB	0.93621	-0.0950956	0.018079	0.1819	0.740167	6.08926	0.214728	2,3-dihydroxy-2,3-dihydrophenylpropionate dehydrogenase
dgcP	1.21121	0.276448	0.0181862	0.182578	0.738551	285.115	0.161062	diguanylate cyclase DgcP
dksA	0.848418	-0.237153	0.0182907	0.182875	0.737844	1910.27	0.126476	RNA polymerase-binding transcription factor DksA
ogt	0.784837	-0.349534	0.0182955	0.182875	0.737844	83.1732	0.265117	methylated-DNA&mdash;[protein]-cysteine <i>S</i>-methyltransferase
map	0.849986	-0.234489	0.0186552	0.186065	0.730335	1339.91	0.124996	methionine aminopeptidase
metT	1.1944	0.256283	0.0188096	0.186839	0.728532	453953	0.143486	tRNA-Met(CAU)
yoaG	0.769452	-0.378097	0.0188142	0.186839	0.728532	38.3269	0.447914	DUF1869 domain-containing protein YoaG
fucP	1.23311	0.302296	0.0188961	0.187247	0.727586	190.632	0.19239	L-fucose:H+ symporter
yjiM	0.784788	-0.349625	0.0189473	0.18735	0.727347	82.0029	0.273685	putative dehydratase subunit
torY	0.910302	-0.135583	0.0189908	0.187376	0.727286	9.7078	0.252551	cytochrome <i>c</i> quinol dehydrogenase TorY
ycfT	0.907758	-0.13962	0.0191183	0.187826	0.726244	10.9823	0.256991	inner membrane protein YcfT
galM	0.826553	-0.274821	0.0191093	0.187826	0.726244	287.491	0.162923	galactose-1-epimerase
yjbB	0.796322	-0.328577	0.0193422	0.18962	0.722117	104.897	0.235289	putative inorganic phosphate export protein YjbB
yabI	0.781446	-0.355781	0.0193937	0.189719	0.721889	115.372	0.294985	DedA family protein YabI
atpC	1.16475	0.220026	0.0196248	0.191165	0.718592	1402.32	0.114976	ATP synthase F<sub>1</sub> complex subunit &epsilon;
leuS	1.15986	0.213955	0.0196203	0.191165	0.718592	1421.35	0.110242	leucine&mdash;tRNA ligase
folM	1.27861	0.354574	0.0197824	0.192084	0.716509	65.1372	0.295711	dihydromonapterin reductase
rhtC	1.26923	0.343955	0.0198816	0.192084	0.716509	85.865	0.269015	L-threonine exporter
yibN	1.17524	0.232957	0.0198867	0.192084	0.716509	603.299	0.125672	putative sulfurtransferase YibN
xseA	0.860118	-0.217393	0.0198373	0.192084	0.716509	1089.35	0.113644	exodeoxyribonuclease VII subunit XseA
rnb	1.20611	0.270359	0.0203578	0.19581	0.708165	342.418	0.161484	RNase II
paaK	1.15723	0.210678	0.020338	0.19581	0.708165	18.2865	0.365503	phenylacetate-CoA ligase
fixA	1.04546	0.0641423	0.0206343	0.198055	0.703215	3.39755	0.195595	putative electron transfer flavoprotein FixA
arfA	1.2634	0.337314	0.0206888	0.198163	0.702977	84.9717	0.263075	alternative ribosome-rescue factor A
ysgD	1.21976	0.286598	0.0210402	0.200691	0.697472	482.384	0.182099	protein YsgD
yfhL	1.21106	0.276274	0.0210346	0.200691	0.697472	298.998	0.170221	putative 4Fe-4S cluster-containing protein YfhL
ompW	1.23787	0.307856	0.0211489	0.201107	0.696572	131.871	0.211933	outer membrane protein W
ynaE	1.20232	0.265821	0.0211715	0.201107	0.696572	494.457	0.158782	Rac prophage; uncharacterized protein YnaE
ygbM	0.949422	-0.0748783	0.0214644	0.203049	0.692399	4.55545	0.201033	putative 2-oxo-tetronate isomerase YgbM
rmuC	0.844202	-0.24434	0.0214217	0.203049	0.692399	385.08	0.138781	putative recombination limiting protein RmuC
panF	1.25898	0.332259	0.0217389	0.203378	0.691696	86.4626	0.261058	pantothenate:Na+ symporter
sbcC	1.21238	0.277838	0.0217472	0.203378	0.691696	231.362	0.173602	ATP-dependent structure-specific DNA nuclease - SbcC subunit
leuX	1.18873	0.249421	0.0217627	0.203378	0.691696	890586	0.143673	tRNA-Leu(CAA)
cysS	1.18033	0.239188	0.0217803	0.203378	0.691696	580.06	0.134387	cysteine&mdash;tRNA ligase
gpmM	1.17831	0.236717	0.0219414	0.203378	0.691696	3449.96	0.13099	2,3-bisphosphoglycerate-independent phosphoglycerate mutase
rpoB	1.17521	0.232921	0.0215924	0.203378	0.691696	5816.67	0.128642	RNA polymerase subunit &beta;
ykfI	0.976655	-0.0340789	0.0219425	0.203378	0.691696	1.86589	0.184218	CP4-6 prophage; toxin of the YkfI-YafW toxin-antitoxin system
yieE	0.861111	-0.215729	0.0218358	0.203378	0.691696	1436.65	0.115039	putative phosphopantetheinyl transferase
manZ	0.853565	-0.228427	0.0218169	0.203378	0.691696	1064.42	0.125533	mannose-specific PTS enzyme IID component
znuC	0.823442	-0.280261	0.0218882	0.203378	0.691696	385.505	0.177714	Zn<sup>2+</sup> ABC transporter ATP binding subunit
bioC	1.04533	0.0639639	0.0221407	0.204802	0.688667	23.5334	0.195347	malonyl-acyl carrier protein methyltransferase
csdE	1.20139	0.264701	0.0223861	0.206655	0.684755	245.557	0.16084	sulfur acceptor protein CsdE
yfcI	0.787162	-0.345268	0.0224499	0.206827	0.684392	52.1241	0.378054
potB	1.21882	0.285489	0.0225332	0.207179	0.683653	205.36	0.186721	spermidine preferential ABC transporter membrane subunit PotB
deoB	1.17478	0.232395	0.022719	0.207894	0.682159	3421.71	0.12953	phosphopentomutase
damX	1.16149	0.215971	0.0227469	0.207894	0.682159	949.267	0.116468	cell division protein DamX
yegV	1.0882	0.12195	0.0227164	0.207894	0.682159	9.04236	0.237117	putative sugar kinase YegV
lomR_2	0.944813	-0.0818989	0.0228212	0.208159	0.681605	4.9371	0.205087
mreD	1.19947	0.262398	0.0229163	0.208194	0.681531	254.977	0.159673	cell shape determining protein MreD
yifL	1.1977	0.260263	0.0229613	0.208194	0.681531	268.758	0.157496	putative lipoprotein YifL
fdoH	0.839536	-0.252335	0.0229493	0.208194	0.681531	535.485	0.149851	formate dehydrogenase O subunit &beta;
polB	1.20573	0.269901	0.0230665	0.208325	0.681259	263.787	0.168316	DNA polymerase II
mrdA	1.16892	0.225176	0.0230389	0.208325	0.681259	739.891	0.124112	peptidoglycan DD-transpeptidase MrdA
add	0.827346	-0.273437	0.0231192	0.208391	0.681121	267.007	0.173207	adenosine deaminase
gutQ	0.82801	-0.27228	0.0232286	0.208966	0.679925	292.158	0.172411	D-arabinose 5-phosphate isomerase GutQ
exuR	0.850737	-0.233214	0.0233398	0.209556	0.678701	567.974	0.132145	DNA-binding transcriptional repressor ExuR
ompA	1.18396	0.243621	0.0234754	0.210362	0.677034	8069.73	0.141358	outer membrane protein A
glyV	1.17602	0.233916	0.0236946	0.210394	0.676968	1.20042e+06	0.132988	tRNA-Gly(GCC)
wecC	1.17289	0.230069	0.0237083	0.210394	0.676968	595.119	0.129625	UDP-<i>N</i>-acetyl-D-mannosamine dehydrogenase
narQ	0.818874	-0.288287	0.0235793	0.210394	0.676968	182.207	0.194473	sensor histidine kinase NarQ
yjbD	0.817517	-0.290679	0.0236842	0.210394	0.676968	234.14	0.199612	DUF3811 domain-containing protein YjbD
nudI	0.802944	-0.31663	0.023671	0.210394	0.676968	109.973	0.247027	pyrimidine deoxynucleotide diphosphatase NudI
yhhY	0.79252	-0.335481	0.0238116	0.210903	0.675918	41.6332	0.391631	<i>N</i>-acetyltransferase YhhY
avtA	0.820023	-0.286264	0.0239266	0.211106	0.675499	232.949	0.193818	valine&mdash;pyruvate aminotransferase
tcyP	0.813496	-0.297793	0.0238806	0.211106	0.675499	128.546	0.211573	cystine/sulfocysteine:cation symporter
ylbH	0.850506	-0.233606	0.0239829	0.211197	0.675312	22.4528	0.390545	putative RHS domain-containing protein YlbH
ftsB	1.18969	0.250591	0.0242102	0.21279	0.672048	336.999	0.150549	cell division protein FtsB
rimI	1.21728	0.28366	0.024363	0.213547	0.670507	166.704	0.190921	protein <i>N</i>-acetyltransferase RimI
sdaA	1.20751	0.272036	0.0244359	0.213547	0.670507	264.977	0.175754	L-serine deaminase I
gatA	0.860132	-0.217369	0.0244259	0.213547	0.670507	1108.36	0.12025	galactitol-specific PTS enzyme IIA component
ecnB	0.802089	-0.318165	0.0246246	0.214786	0.667994	119.369	0.260487	bacteriolytic entericidin B lipoprotein
yihI	1.23436	0.303769	0.0248853	0.215422	0.66671	124.412	0.227127	Der GTPase-activating protein YihI
nth	1.23155	0.30047	0.0248454	0.215422	0.66671	134.484	0.221262	endonuclease III
aroK	1.16227	0.216943	0.0248691	0.215422	0.66671	846.784	0.120153	shikimate kinase 1
fliJ	0.831481	-0.266245	0.0247538	0.215422	0.66671	301.356	0.170064	flagellar biosynthesis protein FliJ
rseX	1.02483	0.0353882	0.0250981	0.216855	0.66383	1.60776	0.184495	small regulatory RNA RseX
leuT	1.17093	0.227658	0.0251846	0.216878	0.663784	262947	0.129841	tRNA-Leu(CAG)
ompX	1.15622	0.209412	0.0252399	0.216878	0.663784	5846.32	0.114426	outer membrane protein X
ygcR	0.942339	-0.0856821	0.0252426	0.216878	0.663784	5.83246	0.207367	putative flavoprotein
smg	0.831137	-0.266842	0.0253519	0.21741	0.66272	243.428	0.171997	DUF494 domain-containing protein Smg
ymiC	1.25151	0.323673	0.0254289	0.217663	0.662215	41.131	0.390589	protein YmiC
macA	0.807905	-0.307742	0.0255156	0.217999	0.661545	98.6789	0.241431	ABC-type tripartite efflux pump membrane fusion protein
tdcB	1.23312	0.302313	0.0257085	0.218023	0.661498	287.49	0.230885	catabolic threonine dehydratase
narK	0.882653	-0.180082	0.0255965	0.218023	0.661498	5655.95	0.094145	nitrate:nitrite antiporter NarK
fruA	0.871397	-0.198598	0.0256699	0.218023	0.661498	2477.74	0.106967	fructose-specific PTS multiphosphoryl transfer protein FruA
yidQ	0.817402	-0.290882	0.0256137	0.218023	0.661498	159.173	0.208468	DUF1375 domain-containing putative lipoprotein YidQ
proA	0.849792	-0.234818	0.025824	0.218599	0.660352	391.108	0.139229	glutamate-5-semialdehyde dehydrogenase
mdtG	1.25253	0.324843	0.02601	0.219504	0.658558	65.7607	0.326383	efflux pump MdtG
glyA	1.17242	0.229486	0.0260525	0.219504	0.658558	836.155	0.133081	serine hydroxymethyltransferase
yjcH	1.04251	0.060061	0.02611	0.219504	0.658558	3.18085	0.193448	DUF485 domain-containing inner membrane protein YjcH
dtd	0.826392	-0.275101	0.0261223	0.219504	0.658558	186.651	0.185871	D-aminoacyl-tRNA deacylase
arcZ	1.18516	0.245086	0.0261787	0.219576	0.658416	3112.31	0.148711	small regulatory RNA ArcZ
metG	1.17387	0.231275	0.0267529	0.223168	0.651368	442.901	0.135909	methionine&mdash;tRNA ligase
bglG	0.938302	-0.091876	0.0266698	0.223168	0.651368	6.8778	0.21136	transcriptional antiterminator BglG
yicI	0.802776	-0.316931	0.0267473	0.223168	0.651368	43.2661	0.367498	&alpha;-D-xyloside xylohydrolase
prs	1.17871	0.237208	0.0268507	0.223172	0.65136	720.139	0.141996	ribose-phosphate diphosphokinase
yjfP	0.803632	-0.315394	0.0268468	0.223172	0.65136	41.6	0.374782	carboxylesterase
efeB	0.912743	-0.131719	0.0269328	0.22345	0.65082	10.6644	0.245578	heme-containing peroxidase/deferrochelatase
mmuP	0.867496	-0.20507	0.0271094	0.224509	0.648767	20.5768	0.339002	CP4-6 prophage; <i>S</i>-methyl-L-methionine transporter
yhhQ	1.20694	0.271357	0.0273522	0.226112	0.645677	194.636	0.184503	queuosine precursor transporter
gatB	0.856006	-0.224308	0.0275296	0.227168	0.643652	572.274	0.130772	galactitol-specific PTS enzyme IIB component
fhuC	0.831575	-0.266081	0.0277347	0.22845	0.641208	29.6029	0.407459	iron(III) hydroxamate ABC transporter ATP binding subunit
rpsB	1.14379	0.193822	0.0278921	0.229335	0.639529	3422.79	0.105148	30S ribosomal subunit protein S2
lspA	1.18316	0.242646	0.0280449	0.229874	0.63851	506.174	0.150224	lipoprotein signal peptidase
ydiJ	0.818054	-0.289731	0.0280579	0.229874	0.63851	120.989	0.219636	putative FAD-linked oxidoreductase YdiJ
yggR	0.933057	-0.0999626	0.0282142	0.230351	0.637611	7.04915	0.217037	Type II/IV secretion system family protein
nrfE	0.815734	-0.293829	0.0282164	0.230351	0.637611	150.021	0.229352	putative cytochrome c-type biogenesis protein NrfE
ppiB	0.872251	-0.197185	0.0285251	0.232457	0.633658	2651.74	0.108784	peptidyl-prolyl <i>cis-trans</i> isomerase B
fimF	0.952618	-0.0700308	0.0291886	0.237442	0.624443	4.27102	0.197933	type 1 fimbriae minor subunit FimF
yqiJ	1.2041	0.267957	0.0294237	0.238931	0.621728	153.138	0.186007	DUF1449 domain-containing inner membrane protein YqiJ
purF	1.21184	0.277195	0.0295246	0.239326	0.621009	159.083	0.202525	amidophosphoribosyltransferase
yciO	1.21142	0.2767	0.0295781	0.239337	0.62099	177.64	0.202518	putative RNA-binding protein YciO
ybcM	1.23554	0.30514	0.029802	0.240725	0.618479	65.1209	0.293221	DLP12 prophage; putative DNA-binding transcriptional regulator
lon	1.14545	0.195913	0.0300208	0.240908	0.618148	3111.72	0.109009	Lon protease
ynfS	0.839286	-0.252765	0.0300373	0.240908	0.618148	373.363	0.167341	Qin prophage; protein YnfS
smrB	0.832431	-0.264598	0.0300873	0.240908	0.618148	194.713	0.184259	ribosome rescue factor SmrB
fumA	0.817687	-0.290379	0.0298913	0.240908	0.618148	104.811	0.233467	fumarase A
uxaA	0.812179	-0.300131	0.030078	0.240908	0.618148	78.3017	0.269399	D-altronate dehydratase
ycdY	1.22097	0.288028	0.0303171	0.242325	0.615601	106.705	0.229173	chaperone protein YcdY
hybC	0.855264	-0.225558	0.0304443	0.242498	0.615293	592.638	0.136388	hydrogenase 2 large subunit
yobD	0.818007	-0.289815	0.0303947	0.242498	0.615293	104.953	0.237778	DUF986 domain-containing inner membrane protein YobD
yadW	0.811358	-0.301589	0.0307034	0.244137	0.612366	56.2432	0.308442	protein YadW
amn	0.830819	-0.267393	0.0310657	0.246591	0.608023	198.869	0.191732	AMP nucleosidase
ytfR	0.887868	-0.171583	0.0315822	0.250258	0.601612	17.4531	0.288974	galactofuranose ABC transporter putative ATP binding subunit
alaV	1.15819	0.211877	0.0318486	0.251933	0.598715	1.42642e+06	0.124816	tRNA-Ala(UGC)
accC	1.1454	0.195851	0.032018	0.252838	0.597158	1167	0.111875	biotin carboxylase
thrU	1.15766	0.211208	0.0325992	0.256984	0.590093	913038	0.125156	tRNA-Thr(UGU)
minD	0.861048	-0.215834	0.0326785	0.257168	0.589783	669.775	0.130122	Z-ring positioning protein MinD
ybgP	0.885108	-0.176074	0.0328243	0.257873	0.588594	20.325	0.292471	putative fimbrial chaperone YbgP
yaeI	0.84905	-0.236078	0.033042	0.259139	0.586466	31.9463	0.35711	phosphodiesterase YaeI
rimO	1.2119	0.277268	0.0331045	0.259187	0.586387	129.333	0.222049	ribosomal protein S12 methylthiotransferase RimO
rsxC	1.1709	0.227617	0.033231	0.259734	0.585472	457.615	0.142913	SoxR [2Fe-2S] reducing system protein RsxC
rffH	1.19431	0.256179	0.0333797	0.26001	0.585009	227.33	0.180251	glucose-1-phosphate thymidylyltransferase 2
yahM	0.84935	-0.235568	0.0333231	0.26001	0.585009	505.365	0.153226	uncharacterized protein YahM
frmR	0.826347	-0.27518	0.0335526	0.260914	0.583502	140.581	0.220253	DNA-binding transcriptional repressor FrmR
amyA	0.842494	-0.247261	0.0340108	0.26403	0.578347	326.105	0.170068	alpha-amylase
spy_3'	1.22185	0.289066	0.0341059	0.264321	0.577869	80.7135	0.293624
hslR	1.20225	0.265741	0.0344409	0.266112	0.574936	153.514	0.201611	heat shock protein Hsp15
ydgI	1.20129	0.264578	0.034453	0.266112	0.574936	214.434	0.199047	putative arginine:ornithine antiporter
guaA	1.17393	0.231352	0.0347661	0.268079	0.571738	660.956	0.149983	GMP synthetase
rbsK	0.849496	-0.23532	0.0348345	0.268155	0.571614	399.019	0.155911	ribokinase
dnaJ	1.15372	0.206298	0.035141	0.269168	0.569976	1101.18	0.123748	chaperone protein DnaJ
yidI	0.834046	-0.261801	0.0351421	0.269168	0.569976	37.5802	0.357653	putative inner membrane protein YidI
insCD-2	0.827098	-0.273869	0.0351352	0.269168	0.569976	45.2062	0.336543
priB	1.1649	0.22021	0.0353258	0.269519	0.569411	1826.72	0.13868	primosomal replication protein N
uspD	0.828529	-0.271376	0.0352856	0.269519	0.569411	127.76	0.219634	universal stress protein D
yhiI	0.824076	-0.27915	0.0353641	0.269519	0.569411	94.798	0.247484	putative membrane fusion protein YhiI
nagZ	0.859373	-0.218644	0.0355395	0.270406	0.567983	532.22	0.137038	&beta;-<i>N</i>-acetylglucosaminidase
rpsU	1.14112	0.190451	0.0356378	0.270706	0.567503	25161.9	0.109992	30S ribosomal subunit protein S21
bglX	1.18231	0.241603	0.0362132	0.274622	0.561265	215.193	0.166484	&beta;-D-glucoside glucohydrolase, periplasmic
ispZ	1.19835	0.261044	0.0364098	0.275657	0.559631	1121.49	0.343499
ybjX	1.16424	0.219383	0.036529	0.276104	0.558928	469.594	0.138917	DUF535 domain-containing protein YbjX
proM	1.18241	0.241731	0.037424	0.276568	0.558198	271023	0.163014	tRNA-Pro(UGG)
yhdT	1.15746	0.210968	0.0374344	0.276568	0.558198	25.5328	0.32497	DUF997 domain-containing protein YhdT
moaA	0.881064	-0.182682	0.0369994	0.276568	0.558198	2754.11	0.104821	GTP 3',8'-cyclase
fur	0.875912	-0.191141	0.0370253	0.276568	0.558198	2458.16	0.112188	DNA-binding transcriptional dual regulator Fur
grxD	0.872851	-0.196193	0.03743	0.276568	0.558198	2545.12	0.116702	glutaredoxin 4
ytfE	0.865335	-0.20867	0.0373667	0.276568	0.558198	57.3647	0.3213	iron-sulfur cluster repair protein YtfE
nuoJ	0.852687	-0.229912	0.0369278	0.276568	0.558198	258.783	0.153689	NADH:quinone oxidoreductase subunit J
glgS	0.850023	-0.234427	0.0371667	0.276568	0.558198	272.143	0.15896	surface composition regulator
dxr	0.84886	-0.236402	0.0374145	0.276568	0.558198	220.632	0.162109	1-deoxy-D-xylulose 5-phosphate reductoisomerase
recC	0.846946	-0.239659	0.036653	0.276568	0.558198	415.861	0.164819	exodeoxyribonuclease V subunit RecC
yfbT	0.841457	-0.249039	0.0371638	0.276568	0.558198	194.467	0.180963
yiiD	0.838061	-0.254872	0.0367999	0.276568	0.558198	154.876	0.190356
ubiA	0.835764	-0.258832	0.0369608	0.276568	0.558198	138.669	0.199088	4-hydroxybenzoate octaprenyltransferase
insCD-3	0.827786	-0.27267	0.0370898	0.276568	0.558198	49.998	0.313486
leuU	1.16819	0.224279	0.03778	0.27792	0.556081	164749	0.145961	tRNA-Leu(GAG)
tolA	1.15016	0.201829	0.037799	0.27792	0.556081	729.847	0.122338	Tol-Pal system protein TolA
yiaF	0.850149	-0.234213	0.0377132	0.27792	0.556081	646.263	0.159905	DUF3053 domain-containing protein YiaF
yeiE	1.18073	0.239677	0.0380938	0.279192	0.554096	253.339	0.167758	DNA-binding transcriptional dual regulator YeiE
dmsA	1.1459	0.196475	0.038044	0.279192	0.554096	1051.94	0.117529	dimethyl sulfoxide reductase subunit A
ydcJ	0.917016	-0.124981	0.0382122	0.279614	0.553442	11.7593	0.235934	DUF1338 domain-containing protein YdcJ
yijO	0.84935	-0.235569	0.0384536	0.28004	0.55278	42.4095	0.334304	putative DNA-binding transcriptional regulator YijO
yfeY	0.838486	-0.254141	0.0384051	0.28004	0.55278	194.694	0.194564	DUF1131 domain-containing lipoprotein YfeY
ydhS	0.831001	-0.267078	0.0384353	0.28004	0.55278	47.2499	0.310211	FAD/NAD(P) binding domain-containing protein YdhS
hflC	1.14701	0.197873	0.0389174	0.282521	0.54895	871.09	0.119901	regulator of FtsH protease
flgB	0.881302	-0.182292	0.0388655	0.282521	0.54895	1617.65	0.106339	flagellar basal-body rod protein FlgB
ssb	1.14121	0.190561	0.0398368	0.288705	0.539545	824.378	0.113667	ssDNA-binding protein
ymgJ	1.02999	0.0426271	0.0398952	0.288705	0.539545	2.08424	0.186386	uncharacterized protein YmgJ
parC	1.14153	0.190968	0.0405309	0.292843	0.533364	791.305	0.114984	DNA topoisomerase IV subunit A
selB	0.871085	-0.199114	0.0407266	0.293795	0.531956	620.111	0.123364	selenocysteyl-tRNA-specific translation elongation factor
dmsC	1.16291	0.217736	0.0408345	0.294111	0.531489	392.989	0.143277	dimethyl sulfoxide reductase subunit C
gsk	1.17665	0.234688	0.0409096	0.29419	0.531372	258.457	0.166465	inosine/guanosine kinase
eptC	1.17682	0.234896	0.041102	0.295111	0.530015	190.762	0.167691	phosphoethanolamine transferase EptC
ydfK	1.15512	0.20804	0.041264	0.29535	0.529664	505.463	0.132925	Qin prophage; cold shock protein YdfK
yajQ	1.15312	0.205537	0.0412415	0.29535	0.529664	1167.58	0.130278	nucleotide binding protein YajQ
tdcC	0.843294	-0.245893	0.0415874	0.297201	0.52695	292.131	0.190073	threonine/serine:H<sup>+</sup> symporter
feoA	1.15579	0.208879	0.0417014	0.297552	0.526437	445.73	0.134538	ferrous iron transport protein A
garR	1.08607	0.119115	0.0421184	0.300061	0.522791	11.7261	0.230293	tartronate semialdehyde reductase
ynfR	1.20036	0.263471	0.042285	0.300781	0.52175	68.8534	0.270052	Qin prophage; protein YnfR
era	1.15979	0.213865	0.0424317	0.301357	0.520918	409.398	0.141265	30S ribosomal subunit maturation GTPase Era
yqiC	0.865356	-0.208634	0.042674	0.302143	0.519788	456.838	0.135855
rsd	0.840438	-0.250787	0.0426454	0.302143	0.519788	208.096	0.205842	regulator of sigma D
yifK	0.852591	-0.230074	0.0428388	0.302806	0.518836	259.782	0.164783	putative transporter YifK
yciU	0.846363	-0.240652	0.0428997	0.302806	0.518836	174.785	0.182916	DUF440 domain-containing protein YciU
sfmH	0.980421	-0.0285269	0.0430904	0.303685	0.517577	1.48387	0.182829	putative fimbrial adhesin protein SfmH
manX	0.887089	-0.172849	0.0432735	0.303706	0.517547	1916.79	0.10159	mannose-specific PTS enzyme IIAB component
ytfP	0.868985	-0.202597	0.043292	0.303706	0.517547	498.305	0.129321	&gamma;-glutamylamine cyclotransferase family protein YtfP
queG	0.863655	-0.211472	0.0432486	0.303706	0.517547	422.229	0.140535	epoxyqueuosine reductase
ychS	1.10719	0.146908	0.0434649	0.304453	0.51648	17.8473	0.255011	putative uncharacterized protein YchS
ssuD	1.04055	0.0573448	0.0437106	0.305242	0.515355	3.87567	0.191679	FMNH<sub>2</sub>-dependent alkanesulfonate monooxygenase
ycfL	0.84859	-0.23686	0.0436795	0.305242	0.515355	232.269	0.178029	DUF1425 domain-containing protein YcfL
yjfC	0.92062	-0.119323	0.0448656	0.312832	0.504689	11.4321	0.229636	putative acid&mdash;amine ligase YjfC
purL	1.18352	0.243084	0.0455078	0.316348	0.499834	178.514	0.197473	phosphoribosylformylglycinamide synthetase
mqo	0.870947	-0.199343	0.0454841	0.316348	0.499834	26.7216	0.299934	malate:quinone oxidoreductase
nfsA	0.846269	-0.240812	0.0457736	0.317468	0.4983	149.811	0.193358	NADPH-dependent nitro/quinone reductase NfsA
exbD	0.843598	-0.245373	0.0458073	0.317468	0.4983	118.662	0.205573	Ton complex subunit ExbD
ygbK	0.893233	-0.162891	0.0460533	0.318691	0.49663	24.0005	0.268504	putative 3-oxo-tetronate kinase YgbK
mgtS	1.16907	0.225366	0.0462359	0.318993	0.496219	227.338	0.164013	small protein MgtS
ydeP	0.89389	-0.161831	0.0461999	0.318993	0.496219	20.0723	0.267638	putative oxidoreductase YdeP
ackA	1.13555	0.183397	0.0465958	0.320993	0.493504	3640.47	0.113308	acetate kinase
hybA	0.864606	-0.209886	0.0467384	0.321493	0.492829	447.984	0.142029	hydrogenase 2 iron-sulfur protein
ompF	1.1586	0.212383	0.0474676	0.324563	0.488702	2332.52	0.146463	outer membrane porin F
rybA	1.12696	0.172441	0.0474609	0.324563	0.488702	1664.73	0.103621	small RNA RybA
ygbN	0.900783	-0.150748	0.0474048	0.324563	0.488702	20.578	0.256357	putative transporter YgbN
yjjJ	0.85143	-0.232041	0.047379	0.324563	0.488702	204.77	0.179903	toxin YjjJ
yjjQ	1.05293	0.0744157	0.0475478	0.324627	0.488615	6.1044	0.199227	DNA-binding transcriptional repressor YjjQ
ileT	1.16391	0.218975	0.0478149	0.325482	0.487473	269965	0.156658	tRNA-Ile(GAU)
wzxC	0.958291	-0.0614644	0.0477745	0.325482	0.487473	5.10475	0.193201	colanic acid repeat unit flippase
rffC	1.16699	0.222787	0.0480668	0.326712	0.485835	200.498	0.163307	RffC
bhsA	0.849122	-0.235955	0.0481568	0.326839	0.485665	46.0657	0.293297	DUF1471 domain-containing multiple stress resistance outer membrane protein BhsA
ibaG	1.16883	0.225064	0.0484969	0.327199	0.485188	196.791	0.168075	acid stress protein IbaG
ybcL	0.918361	-0.122867	0.0484057	0.327199	0.485188	13.3053	0.231973	DLP12 prophage; periplasmic protein YbcL
fliN	0.880449	-0.183689	0.048465	0.327199	0.485188	840.207	0.11549	flagellar motor switch protein FliN
fruK	0.867048	-0.205816	0.0485664	0.327199	0.485188	1460.85	0.139713	1-phosphofructokinase
cobT	0.864413	-0.210207	0.0483194	0.327199	0.485188	35.0222	0.300125	nicotinate-nucleotide&mdash;dimethylbenzimidazole phosphoribosyltransferase
apt	1.15582	0.208911	0.0486491	0.327275	0.485087	402.742	0.1441	adenine phosphoribosyltransferase
rrfG	1.16593	0.221482	0.0487269	0.327319	0.485029	753.305	0.298817	5S ribosomal RNA
yfiS	0.955681	-0.0653988	0.0489461	0.328311	0.483715	5.11066	0.194802	protein YfiS
C0719	0.939597	-0.0898861	0.0492154	0.329636	0.481966	8.30843	0.20788
shoB	1.17405	0.231497	0.0496508	0.331583	0.479407	148.688	0.184111	toxic peptide ShoB
ygcW	1.02046	0.0292175	0.0496299	0.331583	0.479407	1.30052	0.182911	putative deoxygluconate dehydrogenase
yobA	0.851283	-0.232289	0.0499141	0.332857	0.477742	136.664	0.187533	copper-binding protein
yfiR	1.14345	0.193392	0.0501359	0.333389	0.477049	508.486	0.126775	DUF4154 domain-containing protein YfiR
gltA	0.852411	-0.23038	0.0501391	0.333389	0.477049	157.661	0.183374	citrate synthase
nlpD	1.14556	0.196057	0.0505631	0.335628	0.474141	448.871	0.130354	murein hydrolase activator NlpD
clpB	1.12912	0.175195	0.0506954	0.335628	0.474141	12700.4	0.108764	ClpB80 // protein disaggregase ClpB
ssnA	1.03753	0.0531529	0.0506555	0.335628	0.474141	3.37536	0.189773	putative aminohydrolase SsnA
ccmB	0.849751	-0.234888	0.0508102	0.335904	0.473785	214.933	0.197616	cytochrome <i>c</i> maturation protein B
eutB	0.900032	-0.151951	0.0509904	0.33661	0.472873	20.05	0.255997	ethanolamine ammonia-lyase subunit &alpha;
dinB	1.182	0.24123	0.0512579	0.33789	0.471225	66.7742	0.261096	DNA polymerase IV
nikA	1.13634	0.184397	0.0514213	0.33848	0.470466	886.51	0.118412	Ni(2+) ABC transporter periplasmic binding protein
yeeY	0.847167	-0.239282	0.0516972	0.339809	0.468765	98.2757	0.22262	putative DNA-binding transcriptional regulator YeeY
umpG	1.16773	0.223713	0.0521945	0.342587	0.465229	268.376	0.17382	broad specificity 5'(3')-nucleotidase and polyphosphatase
ldtD	0.854587	-0.226701	0.0523612	0.34319	0.464465	170.209	0.181619	L,D-transpeptidase LdtD
mlaA	1.15424	0.206947	0.0525265	0.343293	0.464335	321.46	0.146941	intermembrane phospholipid transport system - outer membrane lipoprotein MlaA
yihM	0.847676	-0.238415	0.0525155	0.343293	0.464335	76.989	0.238403	putative TIM barrel domain-containing protein YihM
yedW	1.15674	0.210069	0.0527471	0.343755	0.463751	45.7355	0.2889
lrp	0.880984	-0.182813	0.0526723	0.343755	0.463751	650.967	0.118189	DNA-binding transcriptional dual regulator Lrp
nrdG	0.85018	-0.23416	0.0530964	0.345541	0.4615	79.8211	0.266088	anaerobic ribonucleoside-triphosphate reductase activating protein
pdxH	1.1456	0.196107	0.0533342	0.346597	0.460175	355.005	0.133633	pyridoxine/pyridoxamine 5'-phosphate oxidase
mcrC	1.17877	0.237282	0.0537153	0.348087	0.458312	93.3548	0.232712	Type IV methyl-directed restriction enzyme EcoKMcrBC subunit
ybhS	0.85442	-0.226982	0.0537122	0.348087	0.458312	70.0731	0.277325	ABC exporter membrane subunit YbhS
3'ETS-leuZ	1.1632	0.218093	0.0542527	0.350679	0.45509	26449.4	0.16855
valY	1.12322	0.167636	0.0542682	0.350679	0.45509	434518	0.104293	tRNA-Val(UAC)
purD	1.17738	0.235586	0.0545604	0.35097	0.45473	72.488	0.253201	phosphoribosylamine--glycine ligase
msrP	1.17703	0.235156	0.0546192	0.35097	0.45473	91.5166	0.220707	protein-L-methionine sulfoxide reductase catalytic subunit MsrP
pyrL	1.17332	0.230595	0.0545197	0.35097	0.45473	89.2811	0.26414	<i>pyrBI</i> operon leader peptide
rrrQ	0.93699	-0.0938949	0.0544264	0.35097	0.45473	9.32707	0.210003	Qin prophage; putative lysozyme
yegW	0.850845	-0.233032	0.0547267	0.351169	0.454484	83.6903	0.255394	putative DNA-binding transcriptional regulator YegW
yhdY	0.947698	-0.0775003	0.0551897	0.353646	0.451432	8.12038	0.200415	putative ABC transporter membrane subunit YhdY
queD	1.1601	0.214252	0.0555048	0.355169	0.449565	215.909	0.163415	6-carboxy-5,6,7,8-tetrahydropterin synthase
sppA	1.15979	0.213866	0.055641	0.355545	0.449106	214.594	0.162822	protease IV, a signal peptide peptidase
yfgG	1.12959	0.175802	0.0558664	0.355861	0.44872	759.185	0.113401	nickel/cobalt stress response protein YfgG
yccT	0.937224	-0.0935337	0.0560784	0.355861	0.44872	8.61448	0.209643	DUF2057 domain-containing protein YccT
cyoB	0.875538	-0.191759	0.055865	0.355861	0.44872	451.805	0.131457	cytochrome <i>bo</i><sub>3</sub> subunit 1
nadE	0.85875	-0.219689	0.0560639	0.355861	0.44872	195.461	0.17613	NH<sub>3</sub>-dependent NAD<sup>+</sup> synthetase
yebF	0.851298	-0.232264	0.0559582	0.355861	0.44872	102.033	0.221791	secreted protein YebF
yihL	1.17021	0.226766	0.0566394	0.356953	0.447389	128.174	0.195915	putative DNA-binding transcriptional regulator YihL
yeeN	1.14013	0.189196	0.056368	0.356953	0.447389	2101.53	0.12845	putative transcriptional regulator YeeN
nusA	1.13785	0.186311	0.0565654	0.356953	0.447389	1760.22	0.125176	transcription termination/antitermination protein NusA
proS	1.12826	0.174098	0.0565832	0.356953	0.447389	887.129	0.112281	proline&mdash;tRNA ligase
yiaA	0.917609	-0.124049	0.0564474	0.356953	0.447389	15.5928	0.230926	PF05360 family inner membrane protein YiaA
yegD	1.1743	0.231796	0.0569481	0.357915	0.44622	82.7287	0.239349	HSP70 family protein YegD
clpP	1.12794	0.173696	0.056943	0.357915	0.44622	863.646	0.112005	ATP-dependent Clp protease proteolytic subunit
lptC	1.14077	0.190007	0.0570678	0.358176	0.445903	467.392	0.130006	lipopolysaccharide transport system protein LptC
yjiC	1.05578	0.0783026	0.0574594	0.358787	0.445163	7.90946	0.200892	DUF2686 domain-containing protein YjiC
djlB	0.939915	-0.0893981	0.057381	0.358787	0.445163	9.16053	0.207061	J domain-containing protein DjlB
pflC	0.921426	-0.11806	0.0572698	0.358787	0.445163	14.4437	0.226349	putative pyruvate formate-lyase 2 activating enzyme PflC
srlB	0.866152	-0.207308	0.0574779	0.358787	0.445163	39.0016	0.277949	sorbitol-specific PTS enzyme IIA component
lysV	1.15111	0.203025	0.0581385	0.361926	0.44138	225277	0.149063	tRNA-Lys(UUU)
ygeI	0.962377	-0.0553257	0.0581373	0.361926	0.44138	3.73968	0.190403	protein YgeI
insC-6	0.909379	-0.137047	0.058447	0.363354	0.43967	18.2695	0.240582
yhjB	0.903764	-0.145981	0.0586761	0.363646	0.439322	25.5096	0.247074	putative DNA-binding transcriptional regulator YhjB
grcA	0.885622	-0.175237	0.0586472	0.363646	0.439322	24743.9	0.114026	stress-induced alternate pyruvate formate-lyase subunit
flgI	0.880389	-0.183786	0.0587318	0.363646	0.439322	717.129	0.123011	flagellar P-ring protein
trmH	1.13686	0.185051	0.0588124	0.363654	0.439311	771.984	0.126347	tRNA (Gm18) 2'-O-methyltransferase
cdsA	1.14546	0.195927	0.0589788	0.363702	0.439254	346.151	0.139492	CDP-diglyceride synthetase
sdhC	0.886255	-0.174206	0.0589307	0.363702	0.439254	26.8372	0.267103	succinate:quinone oxidoreductase, membrane protein SdhC
sdhA	0.854638	-0.226614	0.059669	0.367465	0.434784	90.8655	0.223625	succinate:quinone oxidoreductase, FAD binding protein
epmA	1.14196	0.191512	0.0599051	0.367612	0.43461	460.824	0.135195	EF-P-lysine lysyltransferase
gcvB	1.13097	0.177562	0.0599019	0.367612	0.43461	48250.1	0.113363	small regulatory RNA GcvB
sdhB	0.854645	-0.226603	0.0599333	0.367612	0.43461	81.1931	0.229299	succinate:quinone oxidoreductase, iron-sulfur cluster binding protein
symR	1.14941	0.200894	0.060456	0.369603	0.432265	4258.53	0.149563	small regulatory RNA antitoxin SymR
aroB	1.12775	0.173453	0.0604183	0.369603	0.432265	900.014	0.114429	3-dehydroquinate synthase
moaE	0.867407	-0.205219	0.0605309	0.369603	0.432265	290.106	0.157012	molybdopterin synthase catalytic subunit
dcyD	0.85683	-0.22292	0.06058	0.369603	0.432265	117.521	0.20384	D-cysteine desulfhydrase
yhfA	0.873573	-0.195	0.0609356	0.370786	0.430877	307.914	0.142262	OsmC family protein YhfA
yoaB	0.872129	-0.197387	0.0608637	0.370786	0.430877	335.597	0.145115	RutC family protein YoaB
ftsA	0.891039	-0.16644	0.0611157	0.371389	0.430171	1189.05	0.108087	cell division protein FtsA
mpl	1.13312	0.180304	0.0617652	0.374388	0.426678	531.265	0.122944	UDP-<i>N</i>-acetylmuramate&mdash;L-alanyl-&gamma;-D-glutamyl-<i>meso</i>-2,6-diaminoheptanedioate ligase
hcaE	0.868924	-0.202698	0.0617724	0.374388	0.426678	41.1532	0.269657	putative 3-phenylpropionate/cinnamate dioxygenase subunit &alpha;
efp	0.877953	-0.187785	0.0619433	0.374739	0.426271	3872.05	0.132263	protein chain elongation factor EF-P, &beta;-lysyl-Lys34 // protein chain elongation factor EF-P
gsiB	0.864836	-0.209502	0.0620541	0.374739	0.426271	64.4516	0.265799	glutathione ABC transporter periplasmic binding protein
dctA	0.859097	-0.219106	0.0620754	0.374739	0.426271	157.155	0.197473	C4 dicarboxylate/orotate:H<sup>+</sup> symporter
trmI	1.14166	0.191137	0.0625925	0.377237	0.423386	302.957	0.137649
surA	1.12297	0.167313	0.06272	0.377237	0.423386	1311.3	0.109834	chaperone SurA
umuC	0.898748	-0.154011	0.0627358	0.377237	0.423386	26.8707	0.251274	DNA polymerase V catalytic protein
frlR	0.86195	-0.214324	0.0629613	0.378098	0.422396	60.2517	0.256082	DNA-binding transcriptional regulator FrlR
rlpA	1.14356	0.193533	0.0633794	0.378818	0.421569	412.92	0.141563	rare lipoprotein RlpA
rplE	1.13842	0.187031	0.0632739	0.378818	0.421569	4520.51	0.13365	50S ribosomal subunit protein L5
ygeF	1.04304	0.0607918	0.0632668	0.378818	0.421569	5.5811	0.19236	protein YgeF
ydeO	1.03444	0.0488496	0.0634116	0.378818	0.421569	3.22363	0.188017	DNA-binding transcriptional dual regulator YdeO
puuE	0.951575	-0.0716109	0.0635994	0.378953	0.421415	6.84495	0.197087	4-aminobutyrate aminotransferase PuuE
sthA	0.880318	-0.183903	0.0635368	0.378953	0.421415	446.812	0.129434	soluble pyridine nucleotide transhydrogenase
C0614	1.16162	0.216142	0.0637902	0.379289	0.42103	130.768	0.189845
hybE	0.868385	-0.203594	0.0638211	0.379289	0.42103	220.615	0.159475	hydrogenase 2-specific chaperone
rplF	1.14395	0.194021	0.0641561	0.380787	0.419318	3327.98	0.143819	50S ribosomal subunit protein L6
yhiD	1.13533	0.183112	0.0643723	0.381576	0.418419	50.3993	0.266886	inner membrane protein YhiD
dnaC	0.859228	-0.218887	0.0646211	0.382557	0.417304	78.3104	0.230782	DNA replication protein DnaC
ccmC	0.870946	-0.199345	0.0651154	0.384987	0.414554	318.249	0.15484	cytochrome <i>c</i> maturation protein C
ygjK	1.0802	0.111295	0.0653512	0.385202	0.414311	18.2873	0.22013	glycoside hydrolase
yphC	0.942468	-0.085484	0.0654238	0.385202	0.414311	8.51049	0.204173	putative zinc-binding dehydrogenase YphC
patD	0.906831	-0.141094	0.0653756	0.385202	0.414311	19.6757	0.241053	&gamma;-aminobutyraldehyde dehydrogenase
chpB	0.862254	-0.213816	0.0654878	0.385202	0.414311	136.011	0.191481	endoribonuclease toxin ChpB
artP	1.16182	0.216389	0.0656665	0.385759	0.413683	212.359	0.201816	L-arginine ABC transporter ATP binding subunit
waaO	1.15068	0.202485	0.0658423	0.385804	0.413633	292.135	0.160947	UDP-D-glucose:(glucosyl)LPS &alpha;-1,3-glucosyltransferase
yciT	0.863197	-0.212239	0.0657808	0.385804	0.413633	147.184	0.185946	DNA-binding transcriptional dual regulator YciT
rpsC	0.88166	-0.181705	0.066112	0.385905	0.413519	6719.06	0.129436	30S ribosomal subunit protein S3
exuT	0.881653	-0.181716	0.0661073	0.385905	0.413519	51.6514	0.263369	hexuronate transporter
ydaN	0.865217	-0.208866	0.0660033	0.385905	0.413519	66.7784	0.252841
fimI	0.960933	-0.0574926	0.0661979	0.385916	0.413507	4.66456	0.191055	putative fimbrial protein FimI
rffM	1.15323	0.205682	0.066843	0.387217	0.412046	260.842	0.16951	UDP-N-acetyl-D-mannosaminuronic acid transferase
fepA	1.13136	0.178062	0.066595	0.387217	0.412046	32.56	0.262511	ferric enterobactin outer membrane transporter
ohsC	1.06922	0.0965588	0.0665405	0.387217	0.412046	11.262	0.21063	small regulatory RNA OhsC
paoA	1.05455	0.0766249	0.0667644	0.387217	0.412046	7.30201	0.199487	aldehyde dehydrogenase, Fe-S subunit
tusD	0.861946	-0.214331	0.0668039	0.387217	0.412046	81.8605	0.23625	sulfurtransferase complex subunit TusD
argV	1.03958	0.0560057	0.0670009	0.387642	0.411569	48213.2	0.190661	tRNA-Arg(ACG)
yceK	1.09948	0.136824	0.0672982	0.388872	0.410193	19.6255	0.237865	DUF1375 domain-containing lipoprotein YceK
glgX	1.16088	0.21522	0.0674544	0.389284	0.409733	200.483	0.206742	limit dextrin alpha-1,6-glucohydrolase
pdeI	1.16133	0.215779	0.0675563	0.389383	0.409624	210.346	0.214797	putative c-di-GMP phosphodiesterase PdeI
sufB	1.08515	0.11789	0.0679015	0.390881	0.407956	14.9508	0.224122	Fe-S cluster scaffold complex subunit SufB
yieP	1.1329	0.180021	0.0683887	0.391918	0.406804	1627.79	0.127755	DNA-binding transcriptional dual regulator YieP
rhtB	1.13101	0.177605	0.0684474	0.391918	0.406804	34.2661	0.259916	L-homoserine/L-homoserine lactone/L-threonine exporter
insD-2	0.886724	-0.173443	0.0682933	0.391918	0.406804	30.8562	0.258386
ykfB	0.870131	-0.200695	0.0683609	0.391918	0.406804	63.0867	0.254038	CP4-6 prophage; protein YkfB
fucR	0.86305	-0.212483	0.0685089	0.391918	0.406804	128.152	0.198772	DNA-binding transcriptional activator FucR
gss	1.1494	0.200884	0.0686071	0.391992	0.406723	204.03	0.162555	fused glutathionylspermidine amidase / glutathionylspermidine synthetase
omrA	1.15845	0.212196	0.0688634	0.392832	0.405793	269.612	0.196121	small regulatory RNA OmrA
mipA	1.13966	0.188597	0.0689254	0.392832	0.405793	542.049	0.141008	MltA-interacting protein
G0-10705	1.15887	0.212719	0.0691802	0.393795	0.40473	149.692	0.206633
yfjW	1.14964	0.20118	0.069544	0.394886	0.403529	193.863	0.164945	CP4-57 prophage; uncharacterized protein YfjW
rihA	1.14724	0.198164	0.0695099	0.394886	0.403529	229.241	0.15845	pyrimidine-specific ribonucleoside hydrolase RihA
guaB	1.12685	0.172298	0.0699663	0.396793	0.401436	772.813	0.118254	inosine 5'-monophosphate dehydrogenase
nuoI	0.873052	-0.195861	0.0702255	0.397771	0.400366	370.709	0.155569	NADH:quinone oxidoreductase subunit I
ecnA	0.864388	-0.210249	0.0704669	0.398646	0.399412	107.827	0.199169	entericidin A lipoprotein, antidote to entericidin B
araJ	1.15784	0.211434	0.0705958	0.398884	0.399154	92.2803	0.208338	putative transport protein AraJ
sgrR	0.864509	-0.210048	0.0710235	0.400807	0.397065	110.925	0.220724	DNA-binding transcriptional dual regulator SgrR
rlmI	1.14245	0.192127	0.0711562	0.400847	0.397021	272.629	0.150825	23S rRNA m<sup>5</sup>C1962 methyltransferase
yqjI	0.864983	-0.209257	0.0712054	0.400847	0.397021	122.513	0.197713
yifE	1.12035	0.163947	0.0715503	0.401312	0.396518	3383	0.111036
galF	1.11986	0.163323	0.0715056	0.401312	0.396518	934.039	0.111485	UTP:glucose-1-phosphate uridylyltransferase, low activity
rpsP	1.11322	0.154741	0.0715062	0.401312	0.396518	3054.77	0.102498	30S ribosomal subunit protein S16
katE	0.945857	-0.0803058	0.0716668	0.401474	0.396343	10.0733	0.200965	catalase HPII
srmB	1.12937	0.175524	0.0719592	0.401641	0.396162	452.517	0.126385	ATP-dependent RNA helicase SrmB
hflK	1.12212	0.166223	0.0719132	0.401641	0.396162	1298.87	0.114455	regulator of FtsH protease
yfcV	0.972165	-0.0407267	0.0718265	0.401641	0.396162	2.52659	0.18553	putative fimbrial protein YfcV
yqeG	1.14269	0.192433	0.0720541	0.401682	0.396118	354.355	0.150571	putative transporter YqeG
hflX	1.11618	0.158569	0.0724183	0.402269	0.395483	1712.75	0.107112	ribosome rescue factor HflX
rplP	0.887424	-0.172304	0.0723103	0.402269	0.395483	4773.93	0.123049	50S ribosomal subunit protein L16
fadE	0.866456	-0.206802	0.0724225	0.402269	0.395483	74.103	0.230434	acyl-CoA dehydrogenase
rluA	1.15359	0.20613	0.0727311	0.403495	0.394162	108.269	0.230825	23S rRNA pseudouridine<sup>746</sup> and tRNA pseudouridine<sup>32</sup> synthase
trkH	0.877555	-0.188438	0.0728888	0.403882	0.393746	347.219	0.146252	K+ transporter TrkH
asnU	1.13381	0.181176	0.0730132	0.403946	0.393676	783796	0.134561	tRNA-Asn(GUU)
yjeO	1.10315	0.141627	0.0730766	0.403946	0.393676	23.6479	0.238489	DUF2645 domain-containing inner membrane protein YjeO
adeP	1.14992	0.201535	0.0734552	0.405063	0.392477	181.318	0.175225	adenine:H<sup>+</sup> symporter
narJ	0.89198	-0.164917	0.0734184	0.405063	0.392477	1820.42	0.114777	nitrate reductase 1 molybdenum cofactor assembly chaperone
ykiE	1.15225	0.204458	0.0736658	0.405737	0.391756	169.57	0.184738	protein YkiE
yqiI	1.15074	0.20256	0.0738447	0.406235	0.391223	57.2267	0.238873	putative fimbrial protein YqiI
acnA	0.870835	-0.199528	0.0740065	0.406637	0.390793	173.069	0.171257	aconitate hydratase 1
hflD	1.14233	0.19198	0.0746048	0.409158	0.388109	297.451	0.154412	lysogenization regulator
cpoB	1.12415	0.168837	0.0746436	0.409158	0.388109	776.244	0.119887	cell division coordinator CpoB
viaA	0.877773	-0.188081	0.0752448	0.411961	0.385144	668.557	0.149007	protein ViaA
gspJ	1.03454	0.0489915	0.0754151	0.412401	0.38468	3.49699	0.187886	type II secretion system protein GspJ
dgcI	1.14966	0.201203	0.0756776	0.412778	0.384283	206.614	0.181647	putative diguanylate cyclase DgcI
argY	1.12327	0.167706	0.0755804	0.412778	0.384283	237824	0.11914	tRNA-Arg(ACG)
arsB	1.08729	0.120739	0.0757539	0.412778	0.384283	18.3297	0.224466	arsenite/antimonite:H<sup>+</sup> antiporter
acnB	0.884491	-0.177081	0.0760466	0.413881	0.383124	718.318	0.131965	AcnB
aldB	1.05044	0.070987	0.0764746	0.415046	0.381904	6.04551	0.196347	aldehyde dehydrogenase B
gnsB	0.885234	-0.175868	0.0766001	0.415046	0.381904	527.475	0.131136	Qin prophage; protein GnsB
yidF	0.876148	-0.190753	0.0765876	0.415046	0.381904	1022.24	0.15634	uncharacterized protein YidF
yieH	0.868323	-0.203696	0.076708	0.415046	0.381904	89.3044	0.214502	6-phosphogluconate phosphatase
ybgL	0.868305	-0.203727	0.0767129	0.415046	0.381904	123.635	0.199839
prpE	1.08672	0.119979	0.0770855	0.41657	0.380312	16.885	0.223779	propionyl-CoA synthetase
trmD	1.12404	0.16869	0.0779237	0.419617	0.377147	2218.85	0.122248	tRNA m<sup>1</sup>G37 methyltransferase
hcp	0.93588	-0.0956045	0.0778573	0.419617	0.377147	178.68	0.208901	protein <i>S</i>-nitrosylase
yeiI	0.870902	-0.199417	0.0778987	0.419617	0.377147	81.3653	0.228781	putative sugar kinase YeiI
tcyL	0.887441	-0.172277	0.0780394	0.419748	0.377012	50.5001	0.247878	cystine ABC transporter membrane subunit
phnI	1.01631	0.0233418	0.0781364	0.419777	0.376981	1.23461	0.181776	carbon-phosphorus lyase core complex subunit PhnI
yhdN	1.1495	0.201008	0.0788993	0.420444	0.376292	78.3549	0.222096	DUF1992 domain-containing protein YhdN
fkpB	1.14489	0.195208	0.0787463	0.420444	0.376292	236.183	0.169362	peptidyl-prolyl <i>cis-trans</i> isomerase FkpB
ilvI	1.14474	0.19502	0.0788258	0.420444	0.376292	61.2204	0.236813	acetolactate synthase / acetohydroxybutanoate synthase, catalytic subunit
yccX	0.893762	-0.162037	0.0784987	0.420444	0.376292	30.4668	0.245524	acylphosphatase
dgoK	0.883196	-0.179194	0.078902	0.420444	0.376292	39.5133	0.247424	2-dehydro-3-deoxygalactonokinase
yecA	0.872663	-0.196504	0.0787658	0.420444	0.376292	147.561	0.174958	uncharacterized iron-binding protein YecA
argE	0.869515	-0.201717	0.0783551	0.420444	0.376292	95.4075	0.213526	acetylornithine deacetylase
ymfI	1.14902	0.200407	0.079079	0.420445	0.376291	171.622	0.190892	e14 prophage; uncharacterized protein YmfI
borD	0.877549	-0.188449	0.0790854	0.420445	0.376291	384.713	0.155837	DLP12 prophage; prophage lipoprotein BorD
C0664	1.0489	0.0688818	0.0795015	0.42168	0.375017	5.7246	0.195232
leuZ	0.9658	-0.0502042	0.0794361	0.42168	0.375017	644844	0.17912	tRNA-Leu(UAA)
dkgB	0.871589	-0.198281	0.079598	0.421704	0.374992	78.9169	0.226624	methylglyoxal reductase DkgB
ispD	1.14405	0.194151	0.080352	0.425208	0.371399	198.32	0.171486	2-<i>C</i>-methyl-D-erythritol 4-phosphate cytidylyltransferase
recJ	1.12509	0.170036	0.0806833	0.426469	0.370113	398.304	0.126419	ssDNA-specific exonuclease RecJ
yebT	1.14487	0.19519	0.0807877	0.426529	0.370051	166.392	0.175825
yhbX	1.1481	0.19925	0.0816569	0.427185	0.369384	102.429	0.210152	putative hydrolase YhbX
yjjG	1.14309	0.192933	0.0814218	0.427185	0.369384	161.152	0.170025	pyrimidine 5'-nucleotidase YjjG
ybiE	1.0788	0.109429	0.0812968	0.427185	0.369384	14.1186	0.216612	protein YbiE
yedK	0.94209	-0.0860635	0.0815443	0.427185	0.369384	9.05665	0.203317	genome maintenance protein
pepT	0.89883	-0.15388	0.0811947	0.427185	0.369384	1157.22	0.107364	peptidase T
diaA	0.882007	-0.181138	0.0814385	0.427185	0.369384	253.784	0.144627	DnaA initiator-associating protein DiaA
yciI	0.877544	-0.188457	0.0813995	0.427185	0.369384	312.301	0.158904	protein YciI
yiiS	0.871496	-0.198433	0.0816488	0.427185	0.369384	143.516	0.196433	DUF406 domain-containing protein YiiS
ydbD	0.924963	-0.112532	0.0818033	0.427464	0.3691	18.3597	0.218094	DUF2773 domain-containing protein YdbD
potA	1.12245	0.166651	0.0819321	0.427532	0.369032	585.401	0.122825	spermidine preferential ABC transporter ATP binding subunit
yhfW	1.03796	0.0537497	0.0820154	0.427532	0.369032	4.84077	0.189234	putative mutase YhfW
rstB	0.873796	-0.194632	0.0820958	0.427532	0.369032	146.882	0.179475	sensory histidine kinase RstB - phosphorylated // sensory histidine kinase RstB
rfaH	1.13512	0.182843	0.0822407	0.427801	0.368759	242.168	0.147956	transcription antiterminator RfaH
yfjQ	0.984242	-0.022915	0.0825502	0.428925	0.367619	1.20028	0.181703	CP4-57 prophage; DUF932 domain-containing protein YfjQ
rob	1.11225	0.15348	0.0829097	0.430305	0.366224	989.184	0.10764	DNA-binding transcriptional dual regulator Rob
sseB	1.14166	0.191139	0.083078	0.430357	0.366171	161.265	0.167863	protein SseB
ydfA	0.959752	-0.0592667	0.0831332	0.430357	0.366171	4.89455	0.191229	Qin prophage; DUF1391 domain-containing protein YdfA
ybhG	0.877186	-0.189046	0.0832012	0.430357	0.366171	73.6457	0.232742	HlyD_D23 family protein YbhG
pncC	0.872825	-0.196235	0.0837575	0.432747	0.363766	105.126	0.197091	NMN aminohydrolase
insJK	0.874136	-0.19407	0.0839144	0.43307	0.363442	131.071	0.182968	IS150 protein InsAB
glyY	1.12418	0.168869	0.0845702	0.434558	0.361952	642028	0.127648	tRNA-Gly(GCC)
glmU	1.11692	0.159532	0.0845816	0.434558	0.361952	2095.72	0.115613	fused N-acetylglucosamine-1-phosphate uridyltransferase and glucosamine-1-phosphate acetyltransferase
ybdO	0.915789	-0.126912	0.084545	0.434558	0.361952	21.5892	0.22597	putative LysR family DNA-binding transcriptional regulator YbdO
dsrB	0.883472	-0.178744	0.0843223	0.434558	0.361952	281.963	0.145058	protein DsrB
pheM	1.13488	0.182539	0.0853338	0.436955	0.359563	259.627	0.151715	<i>pheST-ihfA</i> operon leader peptide
pta	1.12351	0.168019	0.0852745	0.436955	0.359563	2432.84	0.127182	phosphate acetyltransferase
ivbL	1.10978	0.150269	0.0853274	0.436955	0.359563	1140.99	0.10551	<i>ilvBN</i> operon leader peptide
yidL	0.932182	-0.101317	0.0856474	0.438071	0.358455	14.1558	0.211178	putative DNA-binding transcriptional regulator YidL
yggE	0.875221	-0.19228	0.0858977	0.438863	0.357671	128.068	0.181564	DUF541 domain-containing protein YggE
frdA	1.1103	0.150947	0.0860133	0.438964	0.357571	2707.63	0.108632	fumarate reductase flavoprotein subunit
uup	1.1294	0.175554	0.086425	0.440087	0.356462	328.227	0.1406	ATP-binding protein Uup
glnS	1.11774	0.160585	0.0864038	0.440087	0.356462	958.475	0.11817	glutamine&mdash;tRNA ligase
fadR	1.12714	0.172665	0.0873936	0.444525	0.352103	426.435	0.135468	DNA-binding transcriptional dual regulator FadR
yecH	0.892854	-0.163503	0.0875828	0.444994	0.351646	1926.46	0.123295	DUF2492 domain-containing protein YecH
abpB	0.880268	-0.183985	0.0880503	0.446875	0.349814	269.626	0.160356	CP4-57 prophage; putative helicase YfjK
sroC	1.12643	0.171753	0.0883036	0.447665	0.349047	576.315	0.13528	small regulatory RNA SroC
yghQ	0.959623	-0.0594603	0.0887106	0.449232	0.347529	5.28117	0.191147	putative transport protein YghQ
ycjX	1.13325	0.180467	0.0890533	0.449479	0.347291	252.855	0.152484	DUF463 domain-containing protein YcjX
proV	0.895369	-0.159446	0.0888607	0.449479	0.347291	1152	0.118686	glycine betaine ABC transporter ATP binding subunit ProV
yheO	0.887867	-0.171584	0.0890249	0.449479	0.347291	333.701	0.136607	DNA-binding transcriptional regulator YheO
yfaT	0.967712	-0.0473498	0.0895711	0.451053	0.345773	3.27903	0.187136	DUF1175 domain-containing protein YfaT
renD	0.901777	-0.149157	0.0897583	0.451053	0.345773	30.0842	0.235062	DLP12 prophage; protein RenD
fliO	0.896716	-0.157276	0.0894821	0.451053	0.345773	927.056	0.116427	flagellar biosynthesis protein FliO
mrr	0.876373	-0.190382	0.0897056	0.451053	0.345773	109	0.202085	Type IV methyl-directed restriction enzyme EcoKMrr
nanA	1.14487	0.195183	0.090138	0.451688	0.345161	173.609	0.210565	<i>N</i>-acetylneuraminate lyase
dld	1.13703	0.185273	0.0901459	0.451688	0.345161	190.886	0.16657	quinone-dependent D-lactate dehydrogenase
lgoT	1.12591	0.171089	0.0904755	0.451688	0.345161	42.3993	0.23639	galactonate:H+ symporter
dnaN	1.12058	0.164243	0.0903918	0.451688	0.345161	683.517	0.125871	&beta; sliding clamp
yehP	1.03903	0.0552314	0.0902508	0.451688	0.345161	4.26989	0.189619	VWA domain-containing protein YehP
insD-3	0.899746	-0.152411	0.0903144	0.451688	0.345161	33.473	0.235407
ynaM	1.13311	0.180289	0.0906254	0.451945	0.344915	356.053	0.154626	Rac prophage; protein YnaM
yjiT	0.879451	-0.185326	0.0907666	0.452158	0.34471	189.594	0.170105	putative uncharacterized protein YjiT
holD	1.12282	0.167131	0.0913414	0.454527	0.34244	541.829	0.131044	DNA polymerase III subunit &psi;
yieF	0.877195	-0.18903	0.0915861	0.455252	0.341749	117.258	0.196807	quinone reductase
yjhH	0.942948	-0.0847492	0.091896	0.455884	0.341146	10.6627	0.201925	KpLE2 phage-like element; putative 2-dehydro-3-deoxy-D-pentonate aldolase
yceM	0.877576	-0.188405	0.091912	0.455884	0.341146	110.282	0.192612	putative oxidoreductase YceM
priA	1.13609	0.184078	0.0920487	0.456068	0.34097	167.689	0.16668	primosomal protein N'
murF	1.11328	0.154823	0.0922797	0.45672	0.34035	636.914	0.114799	D-alanyl-D-alanine-adding enzyme
ybhC	1.12751	0.173136	0.0927485	0.458545	0.338618	244.816	0.142982	outer membrane lipoprotein YbhC
topB	0.893024	-0.163229	0.0934121	0.461329	0.335989	468.766	0.127454	DNA topoisomerase III
pldA	1.12951	0.175701	0.0937129	0.462317	0.33506	228.23	0.149169	outer membrane phospholipase A
cspE_3'	1.12015	0.163687	0.0940446	0.462332	0.335046	8646.98	0.234424
rplM	1.10878	0.148974	0.0940681	0.462332	0.335046	3501.82	0.108777	50S ribosomal subunit protein L13
glpC	0.896575	-0.157504	0.0939514	0.462332	0.335046	1933.4	0.119641	anaerobic glycerol-3-phosphate dehydrogenase subunit C
ykgG	0.878884	-0.186255	0.0941189	0.462332	0.335046	94.7923	0.203277	DUF162 domain-containing lactate utilization protein YkgG
chbF	1.07862	0.109193	0.0946918	0.462669	0.33473	16.8853	0.214442	monoacetylchitobiose-6-phosphate hydrolase
ydjJ	0.973596	-0.0386055	0.0945865	0.462669	0.33473	3.1318	0.18467	putative zinc-binding dehydrogenase YdjJ
ygbL	0.965866	-0.0501049	0.0945233	0.462669	0.33473	4.34594	0.187879	putative 3-oxo-tetronate 4-phosphate decarboxylase YgbL
mlaE	0.891892	-0.165059	0.0946181	0.462669	0.33473	372.86	0.130905	intermembrane phospholipid transport system, integral membrane subunit MlaE
mtfA	0.878714	-0.186534	0.0943265	0.462669	0.33473	139.338	0.194934	Mlc titration factor
ycjY	1.04076	0.0576353	0.0949325	0.463351	0.33409	4.57969	0.190358	putative hydrolase YcjY
ybeX	1.13522	0.182977	0.0957581	0.465071	0.33248	308.506	0.17228	CorC-HlyC family protein YbeX
ppsA	1.13098	0.177571	0.0957917	0.465071	0.33248	61.7185	0.222875	phosphoenolpyruvate synthetase
gcvT	1.13074	0.17727	0.0956733	0.465071	0.33248	251.622	0.154983	aminomethyltransferase
ybcF	1.01946	0.0278114	0.0955198	0.465071	0.33248	1.71263	0.182337	putative carbamate kinase
ygaZ	0.904376	-0.145005	0.0954904	0.465071	0.33248	1395.65	0.105383	L-valine exporter, YgaZ component
rsmC	1.12485	0.169737	0.0960878	0.466016	0.331599	290.754	0.139987	16S rRNA m<sup>2</sup>G1207 methyltransferase
aqpZ	1.08218	0.113943	0.0964991	0.467516	0.330203	18.9681	0.216719	water channel AqpZ
ydaG	1.04236	0.0598583	0.0971986	0.467861	0.329883	5.21611	0.191046	Rac prophage; uncharacterized protein YdaG
secY	0.903652	-0.146161	0.0972841	0.467861	0.329883	15205.7	0.107538	Sec translocon subunit SecY
tag	0.897611	-0.155837	0.0969226	0.467861	0.329883	42.3176	0.230635	3-methyl-adenine DNA glycosylase I, constitutive
tyrR	0.894591	-0.160701	0.0971321	0.467861	0.329883	824.104	0.126473	DNA-binding transcriptional dual regulator TyrR
cspH	0.894411	-0.160991	0.0972708	0.467861	0.329883	434.416	0.127278	CspA family protein CspH
hybF	0.881172	-0.182505	0.0972827	0.467861	0.329883	173.719	0.176103	hydrogenase maturation protein HybF
pncA	0.881147	-0.182546	0.0967958	0.467861	0.329883	136.194	0.176197	nicotinamidase
paaY	0.897605	-0.155848	0.0975513	0.468655	0.329147	39.7771	0.230964	2-hydroxycyclohepta-1,4,6-triene-1-carboxyl-CoA thioesterase
cmtA	0.956004	-0.0649119	0.0979618	0.470134	0.327778	6.07171	0.192877	mannitol-specific PTS enzyme IICB component CmtA
gph	1.13429	0.181789	0.0986599	0.47299	0.325148	180.417	0.177546	phosphoglycolate phosphatase
ydcP	1.13442	0.18195	0.0989629	0.473947	0.32427	137.601	0.178658
rnt	1.13452	0.182077	0.0995488	0.476257	0.322159	113.005	0.182862	ribonuclease T
yncG	0.944574	-0.0822647	0.0996914	0.476442	0.32199	10.5529	0.20028	putative glutathione <i>S</i>-transferase YncG
yfhH	0.882088	-0.181005	0.100264	0.478679	0.319956	103.13	0.194002	putative DNA-binding transcriptional regulator YfhH
rbbA	0.8862	-0.174296	0.100554	0.479564	0.319153	62.4454	0.218856	ribosome-associated ATPase
hpf	0.893858	-0.161882	0.100921	0.480817	0.31802	357.516	0.131192	ribosome hibernation-promoting factor
purH	1.13071	0.177225	0.101697	0.481729	0.317197	146.385	0.168493	bifunctional AICAR transformylase/IMP cyclohydrolase
ycdU	0.931274	-0.102722	0.101743	0.481729	0.317197	14.8816	0.209947	uncharacterized protein YcdU
cspD	0.892809	-0.163577	0.101419	0.481729	0.317197	63.7004	0.226031	DNA replication inhibitor CspD
ycgR	0.890174	-0.16784	0.101343	0.481729	0.317197	57.2922	0.224686	flagellar brake protein YcgR
yidG	0.883327	-0.17898	0.10155	0.481729	0.317197	398.292	0.173523	inner membrane protein YidG
cobB	0.882234	-0.180767	0.101509	0.481729	0.317197	118.773	0.189162	CobB-S // protein-lysine deacetylase/desuccinylase/delipoylase
rhaD	1.03196	0.0453832	0.10195	0.482213	0.316761	4.27025	0.186293	rhamnulose-1-phosphate aldolase
yibQ	1.12417	0.168856	0.102417	0.483426	0.31567	295.73	0.145277	divergent polysaccharide deacetylase domain-containing protein YibQ
alsC	0.954229	-0.0675925	0.102347	0.483426	0.31567	9.66165	0.193888	D-allose ABC transporter membrane subunit
ybaO	1.1264	0.171716	0.102694	0.484236	0.314943	204.642	0.151134
rlmF	1.13085	0.177407	0.103381	0.485078	0.314189	88.4455	0.206129	23S rRNA m<sup>6</sup>A1618 methyltransferase
recG	1.12106	0.164861	0.103405	0.485078	0.314189	615.647	0.138377	ATP-dependent DNA helicase RecG
sibD	1.11239	0.153668	0.103507	0.485078	0.314189	4829.21	0.120639	small RNA SibD
envC	1.10459	0.143511	0.103359	0.485078	0.314189	1350.22	0.10726	murein hydrolase activator EnvC
cas1	1.07709	0.107135	0.103372	0.485078	0.314189	17.2906	0.211987	multifunctional nuclease Cas1
ybeR	1.03083	0.0438029	0.103311	0.485078	0.314189	3.15794	0.185936	DUF1266 domain-containing protein YbeR
yqgD	1.12948	0.175664	0.103828	0.485093	0.314175	144.776	0.171548	DUF2684 domain-containing protein YqgD
ribA	0.892109	-0.164708	0.103817	0.485093	0.314175	471.81	0.139188	GTP cyclohydrolase 2
yafV	0.886929	-0.173109	0.103819	0.485093	0.314175	176.979	0.158754	2-oxoglutaramate amidase
yehL	0.965033	-0.0513491	0.104173	0.485453	0.313853	4.75104	0.188056	putative AAA+ MoxR family ATPase YehL
slyA	0.900338	-0.151461	0.104222	0.485453	0.313853	1367.84	0.118263	DNA-binding transcriptional dual regulator SlyA
yijE	0.884185	-0.177579	0.104078	0.485453	0.313853	160.766	0.177012	cystine exporter
yffL	0.886083	-0.174487	0.104385	0.485717	0.313616	71.2979	0.210336	CPZ-55 prophage; uncharacterized protein YffL
yidB	0.905655	-0.142966	0.104586	0.486159	0.313222	32.1302	0.22554	DUF937 domain-containing protein YidB
sdhX	1.12758	0.17323	0.104938	0.487244	0.312254	419.242	0.160062	small regulatory RNA SdhX
csdA	0.891989	-0.164903	0.105031	0.487244	0.312254	294.268	0.141485	cysteine sulfinate desulfinase
fucI	1.0706	0.0984177	0.105218	0.487619	0.31192	16.7644	0.207312	L-fucose isomerase
ybgS	0.940868	-0.087935	0.1058	0.489693	0.310076	11.6671	0.202423	PF13985 family protein YbgS
preA	0.896879	-0.157015	0.10588	0.489693	0.310076	56.6385	0.224775	dihydropyrimidine dehydrogenase (NAD<sup>+</sup>) subunit PreA
yfgD	0.886315	-0.174108	0.106113	0.49028	0.309556	190.836	0.166024	putative oxidoreductase YfgD
mscM	0.902947	-0.147286	0.106235	0.490348	0.309496	698.403	0.113821	miniconductance mechanosensitive channel MscM
lsrG	0.981184	-0.0274047	0.107003	0.493397	0.306804	1.55952	0.182165	(4<i>S</i>)-4-hydroxy-5-phosphonooxypentane-2,3-dione isomerase
mutT	1.10277	0.141127	0.107376	0.49462	0.305728	35.1637	0.224458	8-oxo-dGTP diphosphatase
cyoD	0.888182	-0.171072	0.107815	0.496142	0.304394	91.5312	0.210889	cytochrome <i>bo</i><sub>3</sub> subunit 4
dsrA	1.12009	0.163609	0.108164	0.496973	0.303667	1028.58	0.14103	small regulatory RNA DsrA
flhD	1.11205	0.153216	0.108212	0.496973	0.303667	519.13	0.12311	DNA-binding transcriptional dual regulator FlhD
fabB	0.911293	-0.134013	0.108686	0.49865	0.302204	2291.87	0.0992329	3-oxoacyl-[acyl carrier protein] synthase 1
ybbJ	1.10859	0.148721	0.109092	0.500016	0.301016	35.4314	0.224511	NfeD-like family protein YbbJ
ppa	0.906886	-0.141007	0.109216	0.500082	0.300959	3106.53	0.107606	inorganic pyrophosphatase
arsR	0.922385	-0.116559	0.109372	0.500299	0.30077	26.013	0.215071	DNA-binding transcriptional repressor ArsR
rhlE	1.123	0.167355	0.10985	0.501221	0.299971	324.354	0.151107	ATP-dependent RNA helicase RhlE
rplR	1.11027	0.150914	0.109901	0.501221	0.299971	2588.73	0.120962	50S ribosomal subunit protein L18
hsdR	0.902891	-0.147376	0.109776	0.501221	0.299971	1253.45	0.115989	type I restriction enzyme EcoKI endonuclease subunit
fimX	1.12169	0.165669	0.110393	0.501714	0.299544	733.316	0.147871
yfcL	1.12117	0.165009	0.110871	0.501714	0.299544	324.791	0.147073	PF08891 family protein YfcL
folD	1.10931	0.149659	0.111259	0.501714	0.299544	573.307	0.119906	bifunctional methylenetetrahydrofolate dehydrogenase / methenyltetrahydrofolate cyclohydrolase
yidD	1.10584	0.145141	0.112258	0.501714	0.299544	683.929	0.1139	membrane protein insertion efficiency factor
creD	1.06732	0.0939896	0.112596	0.501714	0.299544	15.126	0.204647	putative inner membrane protein CreD
ymfN	1.02644	0.0376431	0.110821	0.501714	0.299544	2.64319	0.184337	e14 prophage; chimeric replication protein/phage terminase YmfN
ymiB	0.985791	-0.0206463	0.111517	0.501714	0.299544	1.04618	0.181317	putative protein YmiB
frwD	0.981159	-0.0274406	0.112673	0.501714	0.299544	1.49664	0.182201	putative PTS enzyme IIB component FrwD
torC	0.980953	-0.0277442	0.112478	0.501714	0.299544	1.5032	0.182242	cytochrome <i>c</i> menaquinol dehydrogenase TorC
ydcT	0.966397	-0.0493118	0.110775	0.501714	0.299544	4.07465	0.187328	putative ABC transporter ATP-binding protein YdcT
thiF	0.955584	-0.0655452	0.111777	0.501714	0.299544	8.11539	0.192588	sulfur carrier protein ThiS adenylyltransferase
entS	0.932914	-0.100184	0.110777	0.501714	0.299544	17.666	0.207593	enterobactin exporter EntS
elfC	0.93152	-0.102341	0.111414	0.501714	0.299544	15.7328	0.208523	putative fimbrial usher protein ElfC
yfeR	0.927766	-0.108168	0.112069	0.501714	0.299544	19.7341	0.210872	putative DNA-binding transcriptional regulator YfeR
nuoG	0.908074	-0.139118	0.111998	0.501714	0.299544	1802.07	0.106893	NADH:quinone oxidoreductase subunit G
gutM	0.906735	-0.141247	0.110966	0.501714	0.299544	35.8962	0.222432	DNA-binding transcriptional activator GutM
ychT	0.905575	-0.143094	0.112723	0.501714	0.299544	35.6018	0.221484	protein YchT
ryeA	0.901566	-0.149495	0.111296	0.501714	0.299544	608.286	0.120015	small antisense RNA RyeA
rpsM	0.901386	-0.149783	0.112466	0.501714	0.299544	11871.7	0.121437	30S ribosomal subunit protein S13
zntA	0.894375	-0.161048	0.11217	0.501714	0.299544	316.401	0.140844	Zn<sup>2+</sup>/Cd<sup>2+</sup>/Pb<sup>2+</sup> exporting P-type ATPase
fliQ	0.890251	-0.167717	0.112743	0.501714	0.299544	192.962	0.157713	flagellar biosynthesis protein FliQ
ybjO	0.889165	-0.169478	0.111602	0.501714	0.299544	95.7511	0.204606	putative inner membrane protein
zraR	0.889106	-0.169573	0.112602	0.501714	0.299544	113.234	0.204275	DNA-binding transcriptional activator ZraR-phosphorylated // DNA-binding transcriptional activator ZraR
yecJ	0.887649	-0.17194	0.111367	0.501714	0.299544	201.328	0.173719	DUF2766 domain-containing protein YecJ
yohD	0.887053	-0.172909	0.111566	0.501714	0.299544	134.794	0.182469	DedA family protein YohD
waaP	1.12531	0.170326	0.113104	0.502832	0.298577	165.659	0.168323	lipopolysaccharide core heptose (I) kinase
cysQ	0.889544	-0.168862	0.113294	0.50319	0.298268	196.002	0.163931	3'(2'),5'-bisphosphate nucleotidase
gltD	1.12476	0.169618	0.114334	0.504389	0.297234	165.647	0.169315	glutamate synthase subunit GltD
hcaT	1.12362	0.168152	0.114271	0.504389	0.297234	82.9121	0.203763	putative 3-phenylpropionate transporter
yaiV	1.12253	0.166758	0.114202	0.504389	0.297234	59.9597	0.225829
gadY	1.1183	0.161313	0.113802	0.504389	0.297234	1283.82	0.140134	small regulatory RNA GadY
pnp	1.09983	0.137284	0.114163	0.504389	0.297234	2258.75	0.105658	polynucleotide phosphorylase
astC	1.02121	0.0302754	0.113675	0.504389	0.297234	2.53529	0.182746	succinylornithine transaminase
yccE	0.940103	-0.0891093	0.114184	0.504389	0.297234	12.1662	0.20227	uncharacterized protein YccE
yfiP	1.1246	0.169411	0.114567	0.50493	0.296769	150.228	0.166937
cirA	1.0952	0.131201	0.115259	0.507008	0.294985	33.0446	0.219119	iron-catecholate outer membrane transporter CirA
fdhE	0.899044	-0.153537	0.115161	0.507008	0.294985	564.663	0.129118	formate dehydrogenase formation protein
grxB	1.11691	0.159513	0.115431	0.507277	0.294755	245.264	0.142872	oxidized glutaredoxin 2 // reduced glutaredoxin 2
ygeA	1.0959	0.132112	0.116117	0.509317	0.293012	33.0881	0.219144	amino acid racemase YgeA
yneL	0.977307	-0.0331161	0.11605	0.509317	0.293012	2.21046	0.18329	putative HTH-type transcriptional regulator YneL
insCD-4	0.908332	-0.138709	0.116266	0.509483	0.292871	47.997	0.219146
sulA	1.11855	0.161625	0.117627	0.511538	0.291122	299.86	0.147501	cell division inhibitor SulA
lpoA	1.11575	0.15802	0.117614	0.511538	0.291122	312.403	0.138889	outer membrane lipoprotein - activator of MrcA activity
hisL	1.10427	0.143093	0.117155	0.511538	0.291122	748.639	0.114244	<i>his</i> operon leader peptide
pheU	1.07752	0.107721	0.117454	0.511538	0.291122	123414	0.210464	tRNA-Phe(GAA)
yjfL	1.05617	0.0788436	0.116854	0.511538	0.291122	11.0192	0.197578	DUF350 domain-containing inner membrane protein YjfL
mhpC	1.014	0.0200531	0.117266	0.511538	0.291122	1.06296	0.18122	2-hydroxy-6-ketonona-2,4-dienedioate hydrolase
gatR_1	0.945588	-0.0807171	0.117562	0.511538	0.291122	10.961	0.198309
phoE	0.922582	-0.116251	0.117337	0.511538	0.291122	27.762	0.213618	outer membrane porin PhoE
ycjN	0.968948	-0.0455092	0.1178	0.511807	0.290893	3.65738	0.186125	putative ABC transporter periplasmic binding protein YcjN
cdaR	0.897631	-0.155806	0.118188	0.513005	0.289878	62.2628	0.213605	DNA-binding transcriptional activator CdaR
torI	1.11087	0.151687	0.118519	0.513954	0.289076	683.778	0.12804	CPS-53 (KpLE1) prophage; prophage CPS-53 recombination directionality factor and response regulator inhibitor
mqsR	0.890307	-0.167625	0.118799	0.514685	0.288458	120.813	0.185669	mRNA interferase toxin MqsR
rnc	1.10754	0.14736	0.119033	0.514725	0.288425	706.816	0.121399	RNase III
aceB	0.890477	-0.16735	0.118929	0.514725	0.288425	93.9638	0.192074	malate synthase A
pbpC	1.12302	0.16738	0.12061	0.521053	0.283118	132.528	0.181859	peptidoglycan glycosyltransferase PbpC
yoaC	0.891578	-0.165567	0.121086	0.522619	0.281815	150.293	0.170286	DUF1889 domain-containing protein YoaC
citT	0.923491	-0.11483	0.121584	0.523291	0.281257	22.829	0.212173	citrate:succinate antiporter
zinT	0.904916	-0.144144	0.121494	0.523291	0.281257	42.6107	0.216401	metal-binding protein ZinT
ynjH	0.897637	-0.155796	0.121419	0.523291	0.281257	65.8242	0.210982	DUF1496 domain-containing protein YnjH
rplX	1.10914	0.149445	0.122619	0.524866	0.279951	2572.92	0.12528	50S ribosomal subunit protein L24
mocA	1.1018	0.139862	0.122751	0.524866	0.279951	51.9215	0.217114	molybdenum cofactor cytidylyltransferase
dsdX	1.09211	0.127122	0.122689	0.524866	0.279951	35.1222	0.215746	D-serine transporter
yeaH	0.956392	-0.0643266	0.122522	0.524866	0.279951	6.98547	0.191844	DUF444 domain-containing protein YeaH
sodB	0.897877	-0.155411	0.122166	0.524866	0.279951	725.651	0.139135	superoxide dismutase (Fe)
ytfL	0.895803	-0.158746	0.122602	0.524866	0.279951	248.24	0.147261
mntH	0.8918	-0.165207	0.122579	0.524866	0.279951	106.701	0.192795	Mn<sup>2+</sup>/Fe<sup>2+</sup>: H<sup>+</sup> symporter MntH
yjjB	0.925605	-0.111532	0.122994	0.525417	0.279496	20.1099	0.21054	putative succinate exporter YjjB
ybgA	0.931363	-0.102585	0.12348	0.527	0.278189	17.0282	0.207053	DUF1722 domain-containing protein YbgA
ettA	1.10702	0.146677	0.123799	0.527381	0.277875	622.216	0.122703	energy-dependent translational throttle protein EttA
hyi	1.01376	0.0197126	0.123764	0.527381	0.277875	1.02624	0.181166	hydroxypyruvate isomerase
yqeL	1.03633	0.0514768	0.124	0.527746	0.277575	4.56644	0.187649	uncharacterized protein YqeL
fieF	1.10024	0.137818	0.125037	0.531668	0.274359	1063.49	0.11065	Zn<sup>2+</sup>/Fe<sup>2+</sup>/Cd<sup>2+</sup> exporter
leuW	1.11129	0.152239	0.125764	0.534264	0.272244	209374	0.134376	tRNA-Leu(UAG)
yhfZ	1.11576	0.158022	0.126546	0.534306	0.27221	73.468	0.203516	putative DNA-binding transcriptional regulator YhfZ
mgrB	1.11455	0.156467	0.125914	0.534306	0.27221	268.006	0.14421	PhoQ kinase inhibitor
rhlB	1.10211	0.140274	0.126628	0.534306	0.27221	924.337	0.115326	ATP-dependent RNA helicase RhlB
gsiD	0.901767	-0.149174	0.126341	0.534306	0.27221	50.1801	0.21266	glutathione ABC transporter membrane subunit GsiD
insCD-1	0.901337	-0.149862	0.126624	0.534306	0.27221	48.4502	0.210961
nadC	0.899702	-0.152481	0.126363	0.534306	0.27221	272.599	0.136654	quinolinate phosphoribosyltransferase (decarboxylating)
tas	0.895993	-0.158441	0.126587	0.534306	0.27221	189.934	0.151781	putative NADP(H)-dependent aldo-keto reductase Tas
pbpG	0.893256	-0.162854	0.126706	0.534306	0.27221	134.24	0.181506	peptidoglycan DD-endopeptidase PbpG
mhpT	0.939654	-0.0897982	0.126984	0.534498	0.272054	13.1388	0.201438	3-hydroxyphenylpropionate/3-hydroxycinnamate:H<sup>+</sup> symporter
radA	0.894848	-0.160286	0.12691	0.534498	0.272054	154.204	0.158857	DNA recombination protein
infB	1.09991	0.137383	0.127102	0.534506	0.272048	3098.31	0.110562	translation initiation factor IF-2&beta;' // translation initiation factor IF-2&beta; // translation initiation factor IF-2
alaU	1.09755	0.134288	0.128352	0.539268	0.268196	635855	0.107947	tRNA-Ala(UGC)
chbR	0.920439	-0.119606	0.128772	0.540536	0.267176	27.5226	0.211826	ChbR
mhpB	0.970538	-0.0431435	0.129082	0.540846	0.266927	3.59658	0.185361	3-carboxyethylcatechol 2,3-dioxygenase
yigI	0.944522	-0.0823431	0.129041	0.540846	0.266927	13.4037	0.198323	putative thioesterase YigI
ydjX	1.11003	0.150594	0.129351	0.54123	0.266618	395.013	0.134707	DedA family protein YdjX
thiQ	1.10859	0.148731	0.129763	0.54123	0.266618	48.8125	0.210003	thiamine ABC transporter ATP binding subunit
tgt	1.09772	0.134511	0.129431	0.54123	0.266618	796.571	0.108875	tRNA-guanine transglycosylase
yhfK	0.91173	-0.133322	0.129721	0.54123	0.266618	1162.33	0.107796	putative transporter YhfK
pgpC	0.89703	-0.156772	0.129719	0.54123	0.266618	85.631	0.199114	phosphatidylglycerophosphatase C
pyrC	1.11773	0.16057	0.129902	0.541319	0.266547	187.25	0.165903	dihydroorotase
uhpC	1.10568	0.144939	0.130077	0.541557	0.266356	44.4663	0.212217	UhpC-glucose-6-P // inner membrane protein sensing glucose-6-phosphate
aspC	1.10941	0.149791	0.130608	0.542781	0.265376	424.404	0.134162	aspartate aminotransferase
plsX	0.90981	-0.136362	0.130546	0.542781	0.265376	5700.53	0.111771	putative phosphate acyltransferase
dgoA	0.939111	-0.0906331	0.130783	0.543016	0.265187	13.6988	0.201325	2-dehydro-3-deoxy-6-phosphogalactonate aldolase
ydcA	0.914631	-0.128738	0.131082	0.543274	0.264981	33.7229	0.213117	protein YdcA
smpB	0.900659	-0.150948	0.130977	0.543274	0.264981	588.366	0.13579	SsrA-binding protein
clsA	0.897341	-0.156271	0.131234	0.543413	0.26487	265.523	0.150356	cardiolipin synthase A
csgA	0.972374	-0.0404171	0.131413	0.543426	0.26486	3.77143	0.184673	curlin, major subunit
dadA	0.926603	-0.109977	0.131474	0.543426	0.26486	25.1581	0.208268	D-amino acid dehydrogenase
yhdU	1.08708	0.120458	0.131856	0.544023	0.264383	28.6941	0.211383	DUF2556 domain-containing protein YhdU
ygjQ	1.05709	0.0800987	0.131792	0.544023	0.264383	11.3743	0.19729	DUF218 domain-containing protein YgjQ
yheV	0.927491	-0.108595	0.132179	0.544867	0.263709	21.8385	0.20785	DUF2387 domain-containing protein YheV
mdfA	1.10793	0.147861	0.132525	0.545801	0.262965	74.2524	0.208087	multidrug efflux pump MdfA / Na<sup>+</sup>:H<sup>+</sup> antiporter / K<sup>+</sup>:H<sup>+</sup> antiporter
yeiP	1.11533	0.157476	0.133259	0.548334	0.260955	262.937	0.162658	elongation factor P-like protein YeiP
inaA	0.895901	-0.158588	0.133431	0.548549	0.260785	146.907	0.171019	putative lipopolysaccharide kinase InaA
recO	1.10898	0.149236	0.133771	0.548984	0.260441	407.663	0.134687	recombination mediator protein RecO
galR	0.895757	-0.158821	0.133776	0.548984	0.260441	211.918	0.174496	DNA-binding transcriptional dual regulator GalR
trmO	1.11581	0.158087	0.134027	0.549521	0.260015	187.287	0.162948	tRNA m<sup>6</sup>t<sup>6</sup>A37 methyltransferase
satP	1.11579	0.158068	0.134252	0.54965	0.259914	151.945	0.163296	acetate/succinate:H<sup>+</sup> symporter
zur	0.911216	-0.134135	0.134298	0.54965	0.259914	939.822	0.111034	DNA-binding transcriptional repressor Zur
speE	1.11475	0.156724	0.134921	0.550729	0.259062	210.344	0.163058	spermidine synthase
pdeR	0.923461	-0.114877	0.134743	0.550729	0.259062	27.5737	0.208984	cyclic di-GMP phosphodiesterase PdeR
metQ	0.897747	-0.15562	0.134837	0.550729	0.259062	193.32	0.15606	L-methionine/D-methionine ABC transporter membrane anchored binding protein
rnpA	1.09089	0.125501	0.135311	0.551742	0.258264	9660.21	0.100066	RNase P protein component
mhpR	1.02437	0.0347409	0.13541	0.551742	0.258264	2.45567	0.183482	DNA-binding transcriptional activator MhpR
zapD	1.11374	0.155407	0.135864	0.553071	0.257219	184.671	0.155344	cell division factor ZapD
paaJ	1.05198	0.0731051	0.135977	0.553071	0.257219	9.61816	0.194487	&beta;-ketoadipyl-CoA thiolase
coaD	1.11484	0.156839	0.136922	0.55597	0.254949	130.396	0.167372	pantetheine-phosphate adenylyltransferase
mazF	0.896913	-0.15696	0.136932	0.55597	0.254949	111.354	0.17512	endoribonuclease toxin MazF
cbpA	0.898159	-0.154957	0.137329	0.557086	0.254078	82.6973	0.189716	curved DNA-binding protein
ybhH	0.971312	-0.0419939	0.138075	0.55962	0.252107	3.39533	0.184993	putative isomerase YbhH
purB	1.10876	0.148942	0.138945	0.560112	0.251725	353.408	0.140762	adenylosuccinate lyase
rimM	1.09387	0.129446	0.138903	0.560112	0.251725	2610.8	0.107151	ribosome maturation factor RimM
tonB	0.909732	-0.136487	0.138381	0.560112	0.251725	43.3132	0.20941	Ton complex subunit TonB
yebW	0.903849	-0.145847	0.139051	0.560112	0.251725	69.061	0.203528	DUF1482 domain-containing protein YebW
galP	0.902331	-0.148271	0.138707	0.560112	0.251725	286.569	0.139054	galactose:H<sup>+</sup> symporter
modE	0.898428	-0.154525	0.138834	0.560112	0.251725	84.3198	0.18876	DNA-binding transcriptional dual regulator ModE
hybD	0.897478	-0.156051	0.138507	0.560112	0.251725	169.285	0.170383	hydrogenase 2 maturation protease
ycbZ	1.10435	0.143198	0.139318	0.560694	0.251274	435.823	0.12818	putative ATP-dependent protease YcbZ
yceI	0.939793	-0.0895843	0.139755	0.561961	0.250294	17.1745	0.200099	protein YceI
matP	0.90272	-0.14765	0.140747	0.565453	0.247604	310.195	0.139996	macrodomain Ter protein
ileV	1.10888	0.149097	0.141611	0.56567	0.247437	358414	0.143371	tRNA-Ile(GAU)
rph	1.10488	0.143894	0.142155	0.56567	0.247437	375.729	0.132033	truncated RNase PH
rpsE	1.09652	0.132927	0.141694	0.56567	0.247437	3569.93	0.113033	30S ribosomal subunit protein S5
gyrB	1.09042	0.124884	0.142281	0.56567	0.247437	1856.81	0.10194	DNA gyrase subunit B
pyrG	1.08402	0.116386	0.141501	0.56567	0.247437	3656.43	0.0917405	CTP synthetase
lysA	0.939069	-0.0906969	0.142276	0.56567	0.247437	16.4725	0.200203	diaminopimelate decarboxylase
comR	0.910142	-0.135837	0.142002	0.56567	0.247437	70.965	0.207266	DNA-binding transcriptional repressor ComR
glpQ	0.909972	-0.136106	0.141445	0.56567	0.247437	1546.05	0.117915	glycerophosphoryl diester phosphodiesterase GlpQ
yffS	0.904719	-0.144459	0.14178	0.56567	0.247437	57.3862	0.202763	CPZ-55 prophage; uncharacterized protein YffS
fpr	0.900845	-0.150649	0.141668	0.56567	0.247437	197.497	0.149312	flavodoxin/ferredoxin-NADP<sup>+</sup> reductase
yqfA	0.900558	-0.151109	0.142237	0.56567	0.247437	363.208	0.149545
kdpD	0.899115	-0.153422	0.141846	0.56567	0.247437	142.091	0.162859	sensor histidine kinase KdpD
pgi	1.09595	0.132184	0.143198	0.568031	0.245628	1133.83	0.112195	glucose-6-phosphate isomerase
yeaR	0.924835	-0.112733	0.143246	0.568031	0.245628	45.4353	0.206827	DUF1971 domain-containing protein YeaR
mtn	0.913473	-0.130567	0.143081	0.568031	0.245628	936.625	0.110071	5'-methylthioadenosine/S-adenosylhomocysteine nucleosidase
shiA	0.899418	-0.152937	0.143727	0.569447	0.244546	190.751	0.163996	shikimate:H+ symporter
sbcD	1.11265	0.153998	0.144707	0.569457	0.244539	86.298	0.185887	ATP-dependent structure-specific DNA nuclease - SbcD subunit
agp	1.1115	0.152508	0.145041	0.569457	0.244539	93.8881	0.182688	glucose-1-phosphatase
spf	1.10242	0.140668	0.144599	0.569457	0.244539	72271.7	0.204629	small regulatory RNA Spot 42
lepB	1.10066	0.138373	0.145095	0.569457	0.244539	418.486	0.12425	signal peptidase I
rsuA	1.09804	0.13493	0.144919	0.569457	0.244539	552.474	0.117494	16S rRNA pseudouridine<sup>516</sup> synthase
flu	1.08971	0.123941	0.144835	0.569457	0.244539	32.5147	0.208223	CP4-44 prophage; self recognizing antigen 43 (Ag43) autotransporter
yjeN	1.04705	0.0663292	0.144575	0.569457	0.244539	8.97232	0.191728	uncharacterized protein YjeN
sufA	1.02578	0.0367158	0.145012	0.569457	0.244539	3.27057	0.183706	iron-sulfur cluster insertion protein SufA
ilvM	0.922534	-0.116327	0.143984	0.569457	0.244539	26.498	0.207289	acetolactate synthase II subunit IlvM
nrfG	0.908202	-0.138914	0.14458	0.569457	0.244539	53.3761	0.205213	putative formate-dependent nitrite reductase complex subunit NrfG
syd	0.903281	-0.146753	0.144364	0.569457	0.244539	225.848	0.141727	SecY-interacting protein
ylaC	0.909449	-0.136935	0.145565	0.570816	0.243504	473.427	0.121755	putative inner membrane protein
pyrF	1.11179	0.152878	0.145884	0.571577	0.242925	150.938	0.173416	orotidine-5'-phosphate decarboxylase
ileX	1.10287	0.141263	0.146387	0.573056	0.241803	5959.08	0.206102	tRNA-Ile(CAU)
appC	1.06011	0.0842201	0.146573	0.573295	0.241622	13.1198	0.197719	cytochrome <i>bd</i>-II subunit 1
nuoB	0.912597	-0.13195	0.146834	0.57383	0.241217	596.884	0.114304	NADH:quinone oxidoreductase subunit B
cydD	1.10841	0.148496	0.147381	0.575404	0.240027	224.001	0.146036	glutathione/L-cysteine ABC exporter subunit CydD
aldA	0.929024	-0.106212	0.147488	0.575404	0.240027	24.7194	0.204317	aldehyde dehydrogenase A
ycbF	1.052	0.0731377	0.147905	0.576541	0.23917	11.6811	0.193785	putative fimbrial chaperone YcbF
pspH	1.03807	0.0539002	0.149118	0.580064	0.236524	461.525	0.188002	small regulatory RNA PspH
nmpC	0.906528	-0.141577	0.149096	0.580064	0.236524	643.153	0.133488	DLP12 prophage; putative outer membrane porin NmpC
ycgM	0.90639	-0.141796	0.149188	0.580064	0.236524	335.772	0.134041	putative isomerase/hydrolase
ygiB	1.1089	0.149126	0.15013	0.582926	0.234386	179.013	0.15635	DUF1190 domain-containing protein YgiB
livG	0.955941	-0.0650071	0.150179	0.582926	0.234386	8.63663	0.191003	branched chain amino acid/phenylalanine ABC transporter ATP binding subunit LivG
cmtB	0.987742	-0.0177936	0.150828	0.584457	0.233247	0.969857	0.180905	mannitol-specific PTS enzyme IIA component CmtB
sodC	0.90443	-0.14492	0.150824	0.584457	0.233247	78.3201	0.19251	superoxide dismutase (Cu-Zn)
ycaD	1.104	0.142736	0.150968	0.584507	0.23321	88.9977	0.196701	putative transporter YcaD
iadA	1.10484	0.143838	0.15148	0.585501	0.232472	88.0995	0.195201	isoaspartyl dipeptidase
ydhL	0.943014	-0.0846484	0.151417	0.585501	0.232472	21.0316	0.197444	DUF1289 domain-containing protein YdhL
pflB	1.09356	0.129027	0.151747	0.586041	0.232072	19345.1	0.112744	pyruvate formate-lyase
pdeF	1.10869	0.148852	0.152003	0.586133	0.232004	140.659	0.178505	cyclic di-GMP phosphodiesterase PdeF
yjgW	0.958626	-0.0609596	0.152027	0.586133	0.232004	8.55138	0.189742
mraY	1.09653	0.132948	0.152498	0.587458	0.231023	453.348	0.118666	phospho-N-acetylmuramoyl-pentapeptide-transferase
psiE	0.928764	-0.106617	0.152836	0.588264	0.230428	27.229	0.20357	putative phosphate starvation-inducible protein PsiE
epmB	1.10195	0.140063	0.15339	0.58984	0.229266	336.885	0.133141	lysine 2,3-aminomutase
nlpA	0.92547	-0.111743	0.153502	0.58984	0.229266	30.3649	0.204305	lipoprotein-28
argH	0.907438	-0.140129	0.154545	0.593351	0.226689	59.6845	0.196085	argininosuccinate lyase
yejA	1.09908	0.136295	0.156057	0.598155	0.223186	411.557	0.126935	putative oligopeptide ABC transporter periplasmic binding protein YejA
rplV	0.906712	-0.141284	0.155952	0.598155	0.223186	2617.25	0.137808	50S ribosomal subunit protein L22
cvrA	1.09651	0.132924	0.156532	0.599129	0.222479	438.705	0.120817	putative K<sup>+</sup>:H<sup>+</sup> antiporter
tam	1.05072	0.0713769	0.15663	0.599129	0.222479	11.5138	0.192916	<i>trans</i>-aconitate 2-methyltransferase
asnB	0.90371	-0.146069	0.156703	0.599129	0.222479	153.897	0.158646	asparagine synthetase B
nfrA	1.10657	0.146101	0.157408	0.600322	0.221616	153.511	0.157523	exopolysaccharide secretion system outer membrane protein NfrA
leuQ	1.09304	0.12834	0.157376	0.600322	0.221616	2.33315e+06	0.113554	tRNA-Leu(CAG)
yhhW	0.923784	-0.114373	0.1574	0.600322	0.221616	37.3984	0.203955	quercetin 2,3-dioxygenase
grxA	1.10708	0.146758	0.157899	0.600698	0.221344	119.004	0.170677	oxidized glutaredoxin 1 // reduced glutaredoxin 1
pth	1.10389	0.142593	0.157849	0.600698	0.221344	89.2445	0.18939	peptidyl-tRNA hydrolase
fsaB	1.08072	0.111999	0.157869	0.600698	0.221344	33.431	0.204199	fructose-6-phosphate aldolase 2
asnT	1.0927	0.127897	0.158137	0.601104	0.22105	444538	0.134936	tRNA-Asn(GUU)
kptA	1.09118	0.125883	0.158373	0.601502	0.220763	41.0174	0.203418	RNA 2'-phosphotransferase
cvpA	1.10605	0.145412	0.1603	0.603328	0.219446	146.694	0.174024	colicin V production protein
waaG	1.10592	0.14525	0.160203	0.603328	0.219446	135.026	0.175974	lipopolysaccharide glucosyltransferase I
G0-10702	1.10489	0.143898	0.159702	0.603328	0.219446	106.133	0.184672
queA	1.09874	0.135852	0.160161	0.603328	0.219446	302.75	0.129022	tRNA preQ134 S-adenosylmethionine ribosyltransferase-isomerase
frdB	1.09093	0.125562	0.159388	0.603328	0.219446	1176.04	0.11016	fumarate reductase iron-sulfur protein
ydiS	0.950723	-0.0729034	0.159017	0.603328	0.219446	10.179	0.19312	putative electron transfer flavoprotein-quinone oxidoreductase YdiS
ybiU	0.932289	-0.101151	0.159336	0.603328	0.219446	24.9691	0.201265	DUF1479 domain-containing protein YbiU
secG	0.921134	-0.118518	0.160193	0.603328	0.219446	6735.91	0.100231	Sec translocon subunit SecG
rppH	0.915641	-0.127147	0.159268	0.603328	0.219446	585.04	0.113213	RNA pyrophosphohydrolase
ydfG	0.909924	-0.136182	0.160186	0.603328	0.219446	358.109	0.130492	3-hydroxy acid dehydrogenase YdfG
nrdR	0.905653	-0.14297	0.159781	0.603328	0.219446	192.596	0.1494	NrdR transcriptional repressor
htpG	1.08917	0.123227	0.160477	0.603498	0.219324	2013.2	0.107901	chaperone protein HtpG
intE	0.913956	-0.129803	0.160977	0.604881	0.21833	47.5453	0.199807	e14 prophage; putative integrase
cdd	0.916996	-0.125013	0.161352	0.605796	0.217674	1409.51	0.110879	cytidine/deoxycytidine deaminase
ribF	1.08982	0.124089	0.162216	0.608045	0.216065	709.96	0.109519	bifunctional riboflavin kinase / FMN adenylyltransferase
purE	1.08224	0.114023	0.162145	0.608045	0.216065	37.6465	0.202613	<i>N<sup>5</sup></i>-carboxyaminoimidazole ribonucleotide mutase
ynjD	0.92255	-0.116301	0.162539	0.60876	0.215554	31.8126	0.202469	putative ABC transporter ATP-binding protein YnjD
yicJ	0.960896	-0.0575475	0.162687	0.608817	0.215513	10.6014	0.188377	putative xyloside transporter YicJ
yehS	0.911739	-0.133307	0.163067	0.60974	0.214855	422.026	0.126636	DUF1456 domain-containing protein YehS
ymfS	0.962219	-0.0555632	0.163449	0.610673	0.214192	7.0552	0.18781
lpxB	1.09348	0.12893	0.163754	0.611312	0.213737	595.817	0.117962	lipid A disaccharide synthase
thrS	1.08848	0.122309	0.16448	0.612847	0.212648	3451.52	0.107487	threonine&mdash;tRNA ligase
ryfD	1.08831	0.122085	0.164711	0.612847	0.212648	21531.5	0.108163	small regulatory RNA RyfD
rpmC	0.91998	-0.120325	0.164718	0.612847	0.212648	3098.93	0.10545	50S ribosomal subunit protein L29
glcB	0.917831	-0.1237	0.164724	0.612847	0.212648	41.6947	0.200575	malate synthase G
yeeZ	0.906245	-0.142028	0.164833	0.612847	0.212648	200.225	0.153457	putative epimerase YeeZ
mgtA	1.09929	0.136569	0.165041	0.613123	0.212453	471.413	0.134902	Mg<sup>2+</sup> importing P-type ATPase
ymgL	1.03692	0.0522988	0.165453	0.613167	0.212421	6.12019	0.187061	protein YmgL
lrhA	0.909151	-0.137407	0.165364	0.613167	0.212421	307.012	0.138365	DNA-binding transcriptional dual regulator LrhA
dgcF	0.906549	-0.141543	0.165339	0.613167	0.212421	205.58	0.153132	putative diguanylate cyclase DgcF
rarD	1.09482	0.130696	0.165783	0.613891	0.211909	70.498	0.197792	putative transporter RarD
menI	0.927729	-0.108225	0.166074	0.614474	0.211497	30.6869	0.201	1,4-dihydroxy-2-naphthoyl-CoA hydrolase
fbp	1.10036	0.137976	0.166306	0.614837	0.21124	238.662	0.139577	fructose-1,6-bisphosphatase 1
tnaA	1.10362	0.142239	0.166445	0.614855	0.211227	116.297	0.174541	tryptophanase
caiB	1.06622	0.0925117	0.16661	0.61497	0.211146	25.6398	0.198352	&gamma;-butyrobetainyl-CoA:carnitine CoA transferase
yicU	0.969272	-0.0450263	0.167098	0.616275	0.210226	4.52546	0.185255	protein YicU
eutT	0.980799	-0.0279699	0.167402	0.6169	0.209785	2.59533	0.182058	putative ethanolamine utilization cobalamin adenosyltransferase
cytR	1.09875	0.135858	0.168137	0.617804	0.209149	369.612	0.135412	DNA-binding transcriptional repressor CytR
yffR	0.920073	-0.12018	0.168186	0.617804	0.209149	48.2583	0.19963	CPZ-55 prophage; uncharacterized protein YffR
yqiM	0.91492	-0.128282	0.168127	0.617804	0.209149	53.459	0.197229	protein YqiM
uidR	0.910975	-0.134516	0.167893	0.617804	0.209149	385.617	0.133036	DNA-binding transcriptional repressor UidR
yhbE	1.08923	0.123304	0.168846	0.618249	0.208836	679.81	0.111467	putative transporter YhbE
cadA	1.06831	0.095329	0.168749	0.618249	0.208836	26.53	0.198661	lysine decarboxylase 1
ydeI	1.01962	0.0280292	0.168469	0.618249	0.208836	1.94932	0.182027	BOF family protein YdeI
hdhA	0.916215	-0.126243	0.168744	0.618249	0.208836	45.4313	0.198035	7-&alpha;-hydroxysteroid dehydrogenase
nanR	1.09779	0.134599	0.169627	0.619682	0.207831	315.093	0.134251	NanR
fre	1.09766	0.134432	0.169612	0.619682	0.207831	356.295	0.133477	NAD(P)H-flavin reductase
nuoE	0.909788	-0.136398	0.169643	0.619682	0.207831	466.409	0.138448	NADH:quinone oxidoreductase subunit E
rluF	1.10194	0.140042	0.169795	0.619746	0.207786	96.606	0.178358	23S rRNA pseudouridine<sup>2604</sup> and tRNA<sup>Tyr</sup> pseudouridine<sup>35</sup> synthase
zitB	0.917575	-0.124102	0.17023	0.620838	0.207022	43.145	0.198555	Zn<sup>2+</sup>/Cd<sup>2+</sup>/Ni<sup>2+</sup>/Cu<sup>2+</sup> exporter
fxsA	1.09151	0.126327	0.170949	0.621977	0.206226	709.474	0.116684	protein FxsA
sspB	1.09003	0.124372	0.170882	0.621977	0.206226	825.33	0.113993	ClpXP protease specificity-enhancing factor
rplU	0.918586	-0.122513	0.170789	0.621977	0.206226	8212.37	0.115425	50S ribosomal subunit protein L21
frmA	1.09782	0.134645	0.171295	0.622742	0.205692	240.2	0.138238	<i>S</i>-(hydroxymethyl)glutathione dehydrogenase
pphA	1.05092	0.0716506	0.172669	0.627078	0.202678	11.5533	0.192096	phosphoprotein phosphatase 1
gltJ	0.929607	-0.105307	0.172761	0.627078	0.202678	38.3386	0.19962	glutamate/aspartate ABC transporter membrane subunit GltJ
ycaM	1.06602	0.09223	0.173229	0.627902	0.202108	23.163	0.197476	putative transporter YcaM
sucC	0.907957	-0.139304	0.173262	0.627902	0.202108	129.464	0.167737	succinyl-CoA synthetase subunit &beta;
secM	1.08168	0.113273	0.17378	0.629285	0.201153	1335.13	0.0987325	SecA translation regulator
mioC	1.08501	0.117706	0.174066	0.629328	0.201123	890.472	0.105199	flavoprotein MioC
yhcG	0.913615	-0.130342	0.173976	0.629328	0.201123	58.2177	0.192402	DUF1016 domain-containing protein YhcG
basS	0.911472	-0.13373	0.174351	0.629859	0.200757	69.1269	0.187558	BasS-<i>N</i>-phospho-L-histidine // sensor histidine kinase BasS
yoeE	1.02726	0.0388066	0.174535	0.630028	0.20064	3.29299	0.183806
yoaH	1.09833	0.135315	0.174877	0.630767	0.200131	232.371	0.141298	UFP0181 family protein YoaH
proP	0.913464	-0.13058	0.175152	0.631261	0.199791	490.877	0.129237	osmolyte:H<sup>+</sup> symporter ProP
rhaS	0.969391	-0.0448497	0.175981	0.633754	0.198079	4.95067	0.185059	DNA-binding transcriptional activator RhaS
yfcO	0.908671	-0.138171	0.176188	0.634001	0.19791	142.47	0.168506	DUF2544 domain-containing protein YfcO
umpH	0.912257	-0.132487	0.176467	0.634506	0.197564	299.134	0.135002	UMP phosphatase
clcB	0.925372	-0.111894	0.176783	0.635144	0.197128	33.5856	0.198942	putative chloride:H<sup>+</sup> antiporter ClcB
pncB	1.08555	0.11843	0.177115	0.635344	0.196991	645.658	0.108032	nicotinate phosphoribosyltransferase
rnr	0.918698	-0.122337	0.17703	0.635344	0.196991	1214.89	0.11384	RNase R
leuD	1.07429	0.103383	0.177324	0.635594	0.19682	32.0699	0.199044	3-isopropylmalate dehydratase subunit LeuD
dinD	1.10062	0.138316	0.177889	0.637054	0.195823	112.541	0.165735	DNA damage-inducible protein D
mnmC	1.09908	0.136302	0.180937	0.637054	0.195823	144.002	0.170548	fused tRNA 5-aminomethyl-2-thiouridylate methyltransferase and tRNA 5-aminomethyl-2-thiouridylate synthase
argD	1.09873	0.135834	0.181386	0.637054	0.195823	104.482	0.171834	<i>N</i>-acetylornithine aminotransferase / <i>N</i>-succinyldiaminopimelate aminotransferase
yihG	1.09862	0.135695	0.180961	0.637054	0.195823	156.1	0.151813	1-acylglycerol-3-phosphate <i>O</i>-acyltransferase YihG
valV	1.09826	0.135222	0.181897	0.637054	0.195823	317846	0.137103	tRNA-Val(GAC)
tdk	1.09784	0.134665	0.178733	0.637054	0.195823	275.457	0.143655	thymidine/deoxyuridine kinase
glgP	1.09735	0.134028	0.17948	0.637054	0.195823	356.489	0.140107	glycogen phosphorylase
ybeZ	1.09485	0.130735	0.17919	0.637054	0.195823	448.962	0.130832	PhoH-like protein
pfkA	1.08158	0.113138	0.181864	0.637054	0.195823	2722.43	0.101299	6-phosphofructokinase 1
elaD	1.04308	0.0608509	0.181091	0.637054	0.195823	8.58787	0.188759	protease ElaD
ygdB	1.04082	0.057724	0.17965	0.637054	0.195823	7.54447	0.188062	DUF2509 domain-containing protein YgdB
ydiR	0.980377	-0.0285913	0.179287	0.637054	0.195823	2.40579	0.182074	putative electron transfer flavoprotein subunit YdiR
ygeX	0.973053	-0.0394096	0.180109	0.637054	0.195823	3.74102	0.18385	2,3-diaminopropionate ammonia-lyase
yecV	0.937782	-0.0926762	0.181723	0.637054	0.195823	21.8467	0.196286	protein YecV
rpsQ	0.926593	-0.109992	0.179337	0.637054	0.195823	4328.45	0.0969924	30S ribosomal subunit protein S17
nsrR	0.923206	-0.115275	0.178944	0.637054	0.195823	1373.64	0.104075	DNA-binding transcriptional regulator NsrR
uxaC	0.9183	-0.122962	0.181675	0.637054	0.195823	77.8806	0.193723	D-glucoronate/D-galacturonate isomerase
lysC	0.915398	-0.12753	0.181778	0.637054	0.195823	82.3506	0.189825	aspartate kinase III
uxuA	0.913837	-0.129991	0.178762	0.637054	0.195823	61.6637	0.189183	D-mannonate dehydratase
fdhF	0.912923	-0.131435	0.180765	0.637054	0.195823	294.675	0.136352	formate dehydrogenase H
ppiA	0.912282	-0.132448	0.180376	0.637054	0.195823	225.25	0.138804	peptidyl-prolyl <i>cis-trans</i> isomerase A
sanA	0.9119	-0.133052	0.180476	0.637054	0.195823	246.436	0.141575	DUF218 domain-containing protein SanA
insK	0.91088	-0.134668	0.181468	0.637054	0.195823	85.7927	0.177343	IS150 conserved protein InsB
nlpE	0.910705	-0.134945	0.180152	0.637054	0.195823	87.3817	0.177608	sensor lipoprotein NlpE
yoeA	0.910059	-0.135968	0.18092	0.637054	0.195823	164.77	0.166294	CP4-44 prophage; TonB-dependent receptor plug domain-containing protein YoeA
ycjG	0.909866	-0.136274	0.180648	0.637054	0.195823	147.178	0.163548	L-Ala-D/L-Glu epimerase
intA	0.90963	-0.136648	0.18024	0.637054	0.195823	121.158	0.164518	CP4-57 prophage; integrase IntA
tmk	0.909497	-0.13686	0.179461	0.637054	0.195823	110.407	0.167053	Tmk
yjiA	0.909262	-0.137232	0.179017	0.637054	0.195823	137.842	0.163633	P-loop guanosine triphosphatase YjiA
intD	0.909132	-0.137439	0.178043	0.637054	0.195823	142.808	0.164212	DLP12 prophage; putative integrase
gltS	1.0986	0.135673	0.182078	0.637202	0.195723	118.417	0.171319	glutamate:sodium symporter
ybiC	1.06545	0.0914595	0.182756	0.638927	0.194549	24.2063	0.196025
leuB	0.952362	-0.0704175	0.182849	0.638927	0.194549	11.3174	0.191101	3-isopropylmalate dehydrogenase
potE	1.07772	0.107984	0.183546	0.640873	0.193228	34.4777	0.197457	putrescine transporter PotE
yfcE	1.09774	0.134537	0.183725	0.64101	0.193135	179.538	0.150639	phosphodiesterase YfcE
yibA	1.09846	0.135486	0.184048	0.641652	0.1927	159.05	0.162976	putative lyase containing HEAT-repeat
alaC	0.913498	-0.130526	0.184327	0.642136	0.192373	76.0901	0.183311	glutamate&mdash;pyruvate aminotransferase AlaC
ibsE	0.948279	-0.0766163	0.184796	0.64328	0.1916	14.0778	0.19264	toxic peptide IbsE
rrlB	1.08578	0.118728	0.185313	0.643616	0.191373	3562.52	0.112201	23S ribosomal RNA
yciY	1.08053	0.111744	0.185142	0.643616	0.191373	1322.57	0.10179	uncharacterized protein YciY
yhhT	0.936513	-0.0946291	0.185191	0.643616	0.191373	22.0542	0.196217	putative transporter YhhT
hlyE	0.959974	-0.0589325	0.185558	0.643979	0.191128	9.76068	0.188063	hemolysin E
yliM	1.09218	0.127208	0.186667	0.64601	0.189761	777.946	0.129639	protein YliM
nimR	1.07155	0.0997038	0.186504	0.64601	0.189761	31.982	0.197028	DNA-binding transcriptional repressor NimR
metH	0.915358	-0.127591	0.186462	0.64601	0.189761	354.5	0.130073	cobalamin-dependent methionine synthase
ysaE	0.913745	-0.130136	0.186706	0.64601	0.189761	608.35	0.148477	protein YsaE
ybhF	0.911453	-0.13376	0.187302	0.647583	0.188705	117.533	0.168431	ABC exporter ATP binding subunit YbhF
ycaO	1.09351	0.128969	0.188153	0.649862	0.187179	259.094	0.135195	ribosomal protein S12 methylthiotransferase accessory factor YcaO
ycjS	1.0362	0.0513009	0.188245	0.649862	0.187179	6.04292	0.186237	D-glucoside 3-dehydrogenase
etk	0.913788	-0.130069	0.188518	0.650317	0.186875	82.0245	0.180466	protein-tyrosine kinase Etk
gsiA	0.914282	-0.129288	0.188969	0.651382	0.186164	110.769	0.181123	glutathione ABC transporter ATP binding subunit GsiA
yhjC	0.915896	-0.126745	0.189149	0.651513	0.186077	63.9457	0.185519
yafZ	1.01041	0.014942	0.189344	0.651691	0.185958	0.927376	0.180585	CP4-6 prophage; DUF932 domain-containing protein YafZ
insD-1	0.928553	-0.106944	0.189485	0.651691	0.185958	31.3924	0.195969
ymfH	1.09674	0.133224	0.189961	0.652841	0.185193	143.087	0.162709	e14 prophage; putative protein YmfH
dnaB	1.08384	0.116151	0.190366	0.653742	0.184593	641.282	0.109206	replicative DNA helicase
idnO	1.0482	0.0679076	0.190669	0.654292	0.184228	12.4596	0.190162	5-keto-D-gluconate 5-reductase
potC	1.09584	0.132033	0.191203	0.655635	0.183338	159.091	0.152156	spermidine preferential ABC transporter membrane subunit PotC
murA	1.0862	0.119286	0.191538	0.656292	0.182903	561.077	0.115694	UDP-N-acetylglucosamine 1-carboxyvinyltransferase
yodE	1.0813	0.112768	0.192304	0.658427	0.181492	1029.35	0.105293	CPS-53 (KpLE1) prophage; toxic protein YodE
bcp	0.924222	-0.113689	0.192455	0.658451	0.181476	806.947	0.107001	thiol peroxidase
ygiH	1.09322	0.128579	0.193032	0.658976	0.181131	253.216	0.138938
waaA	1.09134	0.126099	0.193039	0.658976	0.181131	383.335	0.131142	KDO transferase
ybiT	1.09086	0.125462	0.193023	0.658976	0.181131	398.146	0.12976	putative ATP-binding protein YbiT
dcm	1.09422	0.129907	0.194072	0.660132	0.180369	205.507	0.148281	DNA-cytosine methyltransferase
rsfS	1.09305	0.128358	0.194101	0.660132	0.180369	256.254	0.141492	ribosomal silencing factor RsfS
mlaB	1.0929	0.128159	0.194052	0.660132	0.180369	233.086	0.13877	intermembrane phospholipid transport system protein MlaB
mcrB	1.09228	0.127347	0.194314	0.660132	0.180369	281.852	0.136781	McrB<sub>S</sub> // Type IV methyl-directed restriction enzyme EcoKMcrB subunit
asnS	1.08534	0.118148	0.19369	0.660132	0.180369	877.646	0.114687	asparagine&mdash;tRNA ligase
rzoD	0.979805	-0.0294341	0.194385	0.660132	0.180369	2.36922	0.182044	DLP12 prophage; putative prophage lysis lipoprotein RzoD
cas3	0.921126	-0.11853	0.193876	0.660132	0.180369	54.5644	0.19132	CRISPR-associated endonuclease/helicase Cas3
ansA	0.914549	-0.128867	0.195163	0.662283	0.178957	109.893	0.17413	L-asparaginase 1
pheS	1.08963	0.123844	0.195702	0.662699	0.178684	360.879	0.127828	phenylalanine&mdash;tRNA ligase subunit &alpha;
intQ	1.04597	0.0648473	0.195719	0.662699	0.178684	10.7463	0.189153	Qin prophage; putative defective integrase
ybfB	0.980704	-0.028111	0.195503	0.662699	0.178684	2.32562	0.181878	uncharacterized protein YbfB
ybgC	1.08686	0.12016	0.195884	0.662771	0.178636	532.698	0.119783	esterase/thioesterase
trxB	1.08987	0.124154	0.196283	0.663337	0.178266	368.106	0.129059	thioredoxin reductase
glnW	1.08986	0.124144	0.19672	0.663337	0.178266	799598	0.128936	tRNA-Gln(UUG)
clpX	1.07427	0.103354	0.19713	0.663337	0.178266	2442.68	0.0934511	ATP-dependent Clp protease ATP-binding subunit ClpX
alkB	1.0534	0.0750508	0.196958	0.663337	0.178266	14.4666	0.191344	DNA oxidative demethylase
yddY	1.03379	0.0479414	0.197149	0.663337	0.178266	5.63537	0.185303	protein YddY
yraK	0.932055	-0.101514	0.196788	0.663337	0.178266	39.8869	0.194475	putative fimbrial adhesin YraK
yafT	0.920346	-0.119752	0.197208	0.663337	0.178266	63.5863	0.188471	lipoprotein YafT
yfbR	0.916414	-0.125929	0.197121	0.663337	0.178266	76.2587	0.180618	dCMP phosphohydrolase
nfi	1.09426	0.129951	0.197767	0.66473	0.177355	116.809	0.164075	endonuclease V
ypdE	1.02249	0.032086	0.198643	0.666622	0.176121	2.5935	0.182447	aminopeptidase YpdE
yccM	0.94321	-0.0843493	0.198669	0.666622	0.176121	183.53	0.19299	putative electron transport protein YccM
hemA	0.925632	-0.111489	0.198766	0.666622	0.176121	857.287	0.106097	glutamyl-tRNA reductase
tatC	1.08462	0.117186	0.199593	0.667105	0.175806	967.167	0.115761	twin arginine protein translocation system - TatC protein
ghxQ	1.06401	0.0895171	0.199818	0.667105	0.175806	20.9223	0.194612	guanine/hypoxanthine transporter GhxQ
fiu	1.05051	0.0710904	0.199479	0.667105	0.175806	12.6315	0.190485	iron catecholate outer membrane transporter Fiu
prpD	0.980457	-0.0284739	0.19981	0.667105	0.175806	2.24813	0.181903	2-methylcitrate dehydratase
hisJ	0.927534	-0.108528	0.199928	0.667105	0.175806	39.8392	0.192757	histidine ABC transporter periplasmic binding protein
hmp	0.925125	-0.11228	0.199875	0.667105	0.175806	61.4007	0.191494	nitric oxide dioxygenase
waaU	0.915705	-0.127045	0.19909	0.667105	0.175806	363.081	0.142288	putative ADP-heptose:LPS heptosyltransferase 4
gcd	1.09224	0.127295	0.200551	0.668212	0.175086	102.574	0.174987	quinoprotein glucose dehydrogenase
crcB	0.926209	-0.110591	0.200428	0.668212	0.175086	45.1528	0.192128	F<sup>-</sup> channel
ydcR	1.08356	0.115777	0.20073	0.668322	0.175014	50.4533	0.189931	fused putative DNA-binding transcriptional regulator/putative aminotransferase YdcR
yijF	0.953477	-0.0687293	0.201378	0.669993	0.17393	13.0975	0.189683	DUF1287 domain-containing protein YijF
lgoR	1.09074	0.125312	0.201661	0.670111	0.173854	99.6458	0.176606	putative DNA-binding transcriptional regulator LgoR
ypdA	1.08973	0.12397	0.201851	0.670111	0.173854	344.86	0.132979
leuP	1.0802	0.111299	0.201771	0.670111	0.173854	1.9195e+06	0.10646	tRNA-Leu(CAG)
aceF	1.08851	0.122349	0.203408	0.674304	0.171144	3927.61	0.129602	AceF-dihydrolipoate // AceF-S-acetyldihydrolipoate // AceF-lipoate // pyruvate dehydrogenase, E2 subunit
moaB	0.919934	-0.120397	0.20332	0.674304	0.171144	317.359	0.125572	protein MoaB
yghW	0.961456	-0.0567075	0.203874	0.674456	0.171047	10.0831	0.186888	DUF2623 domain-containing protein YghW
yghJ	0.915814	-0.126874	0.203895	0.674456	0.171047	143.07	0.165247	putative lipoprotein YghJ
mtgA	0.915249	-0.127764	0.203602	0.674456	0.171047	190.682	0.154621	peptidoglycan glycosyltransferase MtgA
kdsA	1.08937	0.123492	0.204323	0.675384	0.170449	341.32	0.133986	3-deoxy-D-<i>manno</i>-octulosonate 8-phosphate synthase
rsmA	1.0852	0.117966	0.204889	0.675695	0.170249	607.761	0.120505	16S rRNA m<sup>6</sup><sub>2</sub>A1518,m<sup>6</sup><sub>2</sub>A1519 dimethyltransferase
ypfM	1.08426	0.116713	0.205006	0.675695	0.170249	826.145	0.1176	uncharacterized protein YpfM
amtB	0.945613	-0.0806782	0.204875	0.675695	0.170249	25.4838	0.191612	ammonium transporter
yiiQ	0.915748	-0.126977	0.204974	0.675695	0.170249	110.054	0.166816	DUF1454 domain-containing protein YiiQ
yfcQ	1.01075	0.0154321	0.205379	0.676437	0.169772	0.802935	0.180607	putative fimbrial protein YfcQ
pgaD	1.06613	0.0923844	0.205729	0.677106	0.169343	26.6273	0.19337	poly-<i>N</i>-acetyl-D-glucosamine synthase subunit PgaD
yhbV	0.921182	-0.118442	0.206011	0.677548	0.16906	437.907	0.122541
lomR_1	0.979962	-0.0292026	0.206163	0.677561	0.169052	2.20832	0.181941
nirD	0.927684	-0.108295	0.206368	0.677749	0.168931	1903.75	0.103372	nitrite reductase (NADH) small subunit
yeaC	0.915935	-0.126683	0.206622	0.678099	0.168707	147.971	0.160547	DUF1315 domain-containing protein YeaC
slt	1.09193	0.126882	0.206872	0.678434	0.168493	153.88	0.154396	soluble lytic murein transglycosylase
leuC	0.940358	-0.0887187	0.207193	0.679001	0.16813	23.7508	0.192687	3-isopropylmalate dehydratase subunit LeuC
asnW	1.08643	0.119591	0.208165	0.679759	0.167645	736908	0.125823	tRNA-Asn(GUU)
amiC	1.08632	0.119452	0.207849	0.679759	0.167645	365.32	0.125596	<i>N</i>-acetylmuramoyl-L-alanine amidase C
yiiM	1.08436	0.116839	0.208051	0.679759	0.167645	52.9748	0.186365	6-hydroxyaminopurine reductase
gspG	0.967085	-0.0482861	0.207936	0.679759	0.167645	6.17024	0.185072	type II secretion system protein GspG
csgG	0.945793	-0.0804034	0.207708	0.679759	0.167645	18.8801	0.191519	curli secretion channel
ryjA	1.0548	0.076973	0.208744	0.680196	0.167366	16.8466	0.191042	small RNA RyjA
phnD	1.02621	0.0373218	0.208611	0.680196	0.167366	4.43277	0.183086	phosphonate/phosphate ABC transporter periplasmic binding protein
arnD	0.948234	-0.0766855	0.208497	0.680196	0.167366	17.8892	0.190809	putative 4-deoxy-4-formamido-L-arabinose-phosphoundecaprenol deformylase ArnD
malM	1.0758	0.105416	0.209555	0.681872	0.166297	64.19	0.191404	maltose regulon periplasmic protein
yiaK	1.03164	0.0449327	0.209499	0.681872	0.166297	7.21181	0.184464	2,3-diketo-L-gulonate reductase
cydX	1.09135	0.126108	0.209741	0.681994	0.166219	356.487	0.145152	cytochrome <i>bd</i>-I accessory subunit CydX
ybiR	1.08905	0.123066	0.210096	0.682077	0.166166	95.546	0.175692	putative transporter YbiR
yjjI	1.08598	0.118993	0.210213	0.682077	0.166166	1116.02	0.125275	DUF3029 domain-containing protein YjjI
mnmG	1.07715	0.107221	0.210033	0.682077	0.166166	952.058	0.103363	5-carboxymethylaminomethyluridine-tRNA synthase subunit MnmG
dosC	1.04157	0.0587654	0.210735	0.683289	0.165395	9.65141	0.187196	diguanylate cyclase DosC
uidA	0.956153	-0.0646862	0.211296	0.684595	0.164566	12.5909	0.188298	&beta;-glucuronidase
nrdA	0.922594	-0.116232	0.211437	0.684595	0.164566	566.787	0.120812	ribonucleoside-diphosphate reductase 1 subunit &alpha;
yiaY	0.952351	-0.0704343	0.212104	0.686271	0.163505	12.802	0.189436	L-threonine dehydrogenase
sseA	1.09037	0.124811	0.212336	0.686537	0.163336	154.688	0.153576	3-mercaptopyruvate sulfurtransferase
mdtI	1.04586	0.0646845	0.212723	0.68685	0.163138	12.0314	0.188424	multidrug/spermidine efflux pump membrane subunit MdtI
gudD	0.945309	-0.0811417	0.212732	0.68685	0.163138	18.3864	0.191138	<i>D</i>-glucarate dehydratase
hscA	1.08257	0.114462	0.213492	0.688669	0.16199	414.269	0.117726	iron-sulfur cluster biosynthesis chaperone HscA
sohB	0.920556	-0.119423	0.213595	0.688669	0.16199	312.758	0.130839	S49 peptidase family protein
kbl	1.08241	0.114243	0.213893	0.689145	0.16169	475.802	0.117312	2-amino-3-ketobutyrate CoA ligase
glyX	1.0825	0.114373	0.214577	0.690863	0.160608	1.71203e+06	0.117947	tRNA-Gly(GCC)
rhoL	0.931932	-0.101704	0.214821	0.691165	0.160419	3651.97	0.0970811	<i>rho</i> operon leader peptide
arnF	1.01553	0.0222275	0.215693	0.692511	0.159573	1.72577	0.1811	undecaprenyl-phosphate-&alpha;-L-Ara4N flippase - ArnF subunit
yfeN	0.94242	-0.0855582	0.215621	0.692511	0.159573	23.3208	0.191305	putative outer membrane porin YfeN
ubiG	0.91776	-0.123811	0.215598	0.692511	0.159573	149.763	0.156584	bifunctional 3-demethylubiquinone-<i>8</i> 3-<i>O</i>-methyltransferase and 2-octaprenyl-6-hydroxyphenol methylase
loiP	1.08728	0.12073	0.215925	0.692773	0.159409	75.6115	0.175027	metalloprotease LoiP
mltA	1.08917	0.123224	0.216396	0.692979	0.15928	216.862	0.149053	membrane-bound lytic murein transglycosylase A
rpoZ	1.07434	0.103451	0.216413	0.692979	0.15928	1390.67	0.0998215	RNA polymerase subunit &omega;
ybeL	0.918756	-0.122246	0.216443	0.692979	0.15928	95.5664	0.168382	DUF1451 domain-containing protein YbeL
araF	0.967044	-0.0483459	0.216857	0.693822	0.158752	6.68052	0.184948	arabinose ABC transporter periplasmic binding protein
dnaA	1.07739	0.10754	0.217635	0.695826	0.157499	1144.79	0.106094	chromosomal replication initiator protein DnaA
yfgO	1.08688	0.120186	0.218443	0.696466	0.1571	85.2887	0.174075	putative transporter YfgO
mgtL	1.0815	0.113039	0.218369	0.696466	0.1571	1967.64	0.1156	leader peptide MgtL
yhiM	1.05249	0.0738009	0.218221	0.696466	0.1571	17.3576	0.18982	inner membrane protein YhiM
yagL	0.927195	-0.109056	0.21828	0.696466	0.1571	44.1184	0.187001	CP4-6 prophage; resolvase-like catalytic domain-containing protein YagL
glgA	1.08863	0.122508	0.220168	0.696653	0.156983	153.795	0.159602	glycogen synthase
tsaD	1.08645	0.119628	0.21963	0.696653	0.156983	260.615	0.135421	N<sup>6</sup>-L-threonylcarbamoyladenine synthase, TsaD subunit
truC	1.07914	0.10988	0.220433	0.696653	0.156983	72.1418	0.186394	tRNA pseudouridine<sup>65</sup> synthase
acrB	1.07567	0.105236	0.220126	0.696653	0.156983	989.063	0.104008	multidrug efflux pump RND permease AcrB
yohC	1.05139	0.0723017	0.219476	0.696653	0.156983	14.6054	0.189299	putative inner membrane protein
insB-6	0.93667	-0.0943875	0.220475	0.696653	0.156983	31.5815	0.190798
lsrK	0.936559	-0.0945589	0.219022	0.696653	0.156983	29.8478	0.190782	autoinducer-2 kinase
opgG	0.922899	-0.115755	0.219781	0.696653	0.156983	492.599	0.125182	osmoregulated periplasmic glucans biosynthesis protein G
ompT	0.922699	-0.116068	0.219003	0.696653	0.156983	1337.24	0.125511	DLP12 prophage; omptin family outer membrane protease OmpT
yjjU	0.922467	-0.116431	0.219142	0.696653	0.156983	71.6655	0.179297	putative patatin-like phospholipase YjjU
yaaA	0.918927	-0.121977	0.220345	0.696653	0.156983	166.932	0.150605	DNA binding and peroxide stress response protein YaaA
ygaH	0.918822	-0.122142	0.219464	0.696653	0.156983	129.429	0.161277	L-valine exporter, YgaH component
ymdB	0.918732	-0.122284	0.219576	0.696653	0.156983	150.128	0.157968	2'-<i>O</i>-acetyl-ADP-ribose deacetylase, regulator of RNase III activity
yeiH	1.08626	0.119366	0.220779	0.696897	0.156831	108.578	0.171597	PF03601 family inner membrane protein YeiH
yeaY	0.918901	-0.122018	0.220856	0.696897	0.156831	167.545	0.154515	Slp family lipoprotein YeaY
yadL	1.03067	0.0435888	0.221329	0.697908	0.156202	5.25453	0.183967	putative fimbrial protein YadL
wzzB	1.07669	0.106601	0.221653	0.698451	0.155864	1946	0.106628	O-antigen co-polymerase
hyaD	1.03206	0.0455229	0.222503	0.700401	0.154653	5.91391	0.18434	putative hydrogenase 1 maturation protease HyaD
nanT	0.934485	-0.0977573	0.22273	0.700401	0.154653	34.6961	0.189755	<i>N</i>-acetylneuraminate:H<sup>+</sup> symporter
ykgM	0.934059	-0.098415	0.222668	0.700401	0.154653	36.0086	0.189135	50S ribosomal subunit protein L31B
ygeM	0.977672	-0.0325773	0.223128	0.700692	0.154473	3.02311	0.182256
nfrB	0.91941	-0.12122	0.223031	0.700692	0.154473	135.288	0.157192	cyclic di-3',5'-guanylate-activated glycosyltransferase
tldD	0.927293	-0.108903	0.223393	0.701045	0.154254	649.956	0.113846	metalloprotease subunit TldD
yghZ	1.08723	0.120656	0.223918	0.701254	0.154125	98.9258	0.165675
rcnR	1.08104	0.112415	0.223891	0.701254	0.154125	63.4211	0.18269	DNA-binding transcriptional repressor RcnR
fucK	0.937646	-0.0928853	0.223659	0.701254	0.154125	30.1101	0.190143	L-fuculokinase
yoeI	1.07816	0.108577	0.224608	0.701975	0.153678	46.8159	0.185457	uncharacterized protein YoeI
ykgN	1.07625	0.106016	0.224603	0.701975	0.153678	52.1368	0.186676
gntP	1.05687	0.0797965	0.224437	0.701975	0.153678	22.8087	0.190123	fructuronate transporter
relB	0.922552	-0.116298	0.224999	0.702719	0.153218	73.2454	0.175979	Qin prophage; antitoxin/DNA-binding transcriptional repressor RelB
ydcV	0.976833	-0.0338157	0.225457	0.703673	0.152629	2.99164	0.182392	putative ABC transporter membrane subunit YdcV
pphB	1.05011	0.0705353	0.225648	0.703788	0.152558	14.2742	0.188677	phosphoprotein phosphatase 2
artM	1.08438	0.116866	0.226053	0.704573	0.152074	72.7793	0.174229	L-arginine ABC transporter membrane subunit ArtM
sraG	1.05047	0.0710327	0.226963	0.70693	0.150623	14.7624	0.188732	small regulatory RNA SraG
yhgO	0.937521	-0.0930777	0.227323	0.707569	0.150231	31.2201	0.189606	protein YhgO
yciQ	1.08623	0.119333	0.229414	0.708152	0.149873	171.828	0.153609	DUF2207 domain-containing protein YciQ
ydiH	1.0811	0.112494	0.228128	0.708152	0.149873	67.5178	0.179998	uncharacterized protein YdiH
proL	1.08077	0.112059	0.228154	0.708152	0.149873	254052	0.108153	tRNA-Pro(GGG)
dam	1.07985	0.110836	0.228222	0.708152	0.149873	417.96	0.118239	DNA adenine methyltransferase
rpsD	1.07835	0.108823	0.228116	0.708152	0.149873	6744.98	0.113175	30S ribosomal subunit protein S4
ybdR	1.06248	0.0874292	0.229517	0.708152	0.149873	26.0469	0.189731	putative Zn<sup>2+</sup>-dependent alcohol dehydrogenase YbdR
kdpA	1.04183	0.0591265	0.229466	0.708152	0.149873	9.90709	0.186578	K<sup>+</sup> transporting P-type ATPase subunit KdpA
frlC	0.962337	-0.0553857	0.229371	0.708152	0.149873	12.4698	0.185829	fructoselysine 3-epimerase
yqeC	0.941108	-0.0875671	0.229329	0.708152	0.149873	24.0746	0.189626	uncharacterized protein YqeC
aroP	0.92813	-0.107601	0.229168	0.708152	0.149873	53.4181	0.183952	aromatic amino acid:H<sup>+</sup> symporter AroP
betT	0.924461	-0.113315	0.229331	0.708152	0.149873	90.8152	0.177714	choline:H+ symporter
serC	0.922715	-0.116043	0.22945	0.708152	0.149873	342.067	0.133461	phosphoserine/phosphohydroxythreonine aminotransferase
xerD	0.920653	-0.119271	0.229093	0.708152	0.149873	170.089	0.155704	site-specific recombinase
ykgH	0.96456	-0.0520572	0.229703	0.70825	0.149813	7.78806	0.185175	uncharacterized protein YkgH
yibF	0.925675	-0.111422	0.229881	0.708324	0.149768	63.3217	0.180417	glutathione transferase-like protein YibF
rprA	1.07152	0.099661	0.230058	0.708394	0.149725	38.9161	0.187946	small regulatory RNA RprA
ycaL	0.951971	-0.0710099	0.230369	0.708875	0.14943	16.4098	0.188343	periplasmic protease YcaL
yhbW	0.92303	-0.115551	0.230787	0.709685	0.148934	233.171	0.13338	putative luciferase-like monooxygenase YhbW
ygaU	0.92499	-0.11249	0.230956	0.709729	0.148907	81.6517	0.177436
chbB	1.0866	0.119823	0.232266	0.710276	0.148573	138.328	0.152512	<I>N,N'</I>-diacetylchitobiose-specific PTS enzyme IIB component
murJ	1.08543	0.118264	0.231626	0.710276	0.148573	184.446	0.145534	lipid II flippase MurJ
malS	1.04966	0.0699232	0.231884	0.710276	0.148573	20.7591	0.188198	alpha-amylase
agaS	0.985137	-0.0216044	0.23215	0.710276	0.148573	1.73419	0.180948	putative galactosamine-6-phosphate deaminase/isomerase
eyeA	0.968331	-0.0464278	0.232236	0.710276	0.148573	5.95817	0.184198	CP4-6 prophage; small RNA EyeA
yfeW	0.931141	-0.102929	0.232279	0.710276	0.148573	50.4411	0.185874	penicillin binding protein 4B
ymcE	0.929816	-0.104982	0.232372	0.710276	0.148573	3130.12	0.108864	protein YmcE
och5	0.926051	-0.110837	0.231992	0.710276	0.148573	84.6465	0.179811	small regulatory RNA Och5
hisD	1.08137	0.112855	0.233148	0.710552	0.148404	67.6601	0.176616	histidinal/histidinol dehydrogenase
tktA	1.07763	0.107863	0.233005	0.710552	0.148404	1640.44	0.113898	transketolase 1
gspI	1.02598	0.0369998	0.233121	0.710552	0.148404	4.35539	0.182785	type II secretion system protein GspI
yibL	0.92351	-0.114801	0.232676	0.710552	0.148404	262.555	0.132321	DUF2810 domain-containing protein YibL
nuoK	0.921512	-0.117925	0.233237	0.710552	0.148404	161.297	0.152213	NADH:quinone oxidoreductase subunit K
hdeD	1.08513	0.11787	0.233772	0.710586	0.148383	284.922	0.14758	acid-resistance membrane protein
zntR	1.08132	0.112796	0.233581	0.710586	0.148383	93.6894	0.176758	DNA-binding transcriptional activator ZntR
yeeR	1.05061	0.0712258	0.233868	0.710586	0.148383	15.5377	0.18819	CP4-44 prophage; inner membrane protein YeeR
yfiB	0.928661	-0.106777	0.233755	0.710586	0.148383	61.3342	0.182943	lipoprotein YfiB
ldrD	1.0778	0.108086	0.234033	0.710619	0.148363	83.0363	0.181781	small toxic polypeptide LdrD
ybdD	0.96158	-0.0565211	0.23448	0.711504	0.147823	11.4639	0.185838	PF04328 family protein YbdD
pspE	0.921895	-0.117326	0.234954	0.712472	0.147232	181.706	0.158414	thiosulfate sulfurtransferase PspE
rayT	0.947591	-0.0776638	0.235139	0.71256	0.147179	19.5032	0.188709	REP-associated tyrosine transposase
kdsB	1.08198	0.11367	0.235566	0.713384	0.146676	332.701	0.130141	3-deoxy-<i>manno</i>-octulosonate cytidylyltransferase
fadI	0.927233	-0.108997	0.236016	0.714276	0.146134	67.3498	0.180135	3-ketoacyl-CoA thiolase FadI
yheT	1.08457	0.117126	0.237009	0.715117	0.145623	152.556	0.15573	putative hydrolase YheT
rlmG	1.08392	0.116254	0.237172	0.715117	0.145623	172.058	0.142806	23S rRNA m<sup>2</sup>G1835 methyltransferase
ryeG	1.07369	0.102576	0.237	0.715117	0.145623	1059.79	0.105937	small RNA RyeG
ftsH	1.06992	0.0975042	0.23694	0.715117	0.145623	2938.7	0.0975694	ATP-dependent zinc metalloprotease FtsH
gyrA	1.06768	0.0944803	0.237682	0.715117	0.145623	2404.01	0.093561	DNA gyrase subunit A
ydiZ	0.9767	-0.0340127	0.237695	0.715117	0.145623	4.19331	0.182267	putative endoribonuclease YdiZ
ydfC	0.975871	-0.0352373	0.237853	0.715117	0.145623	3.3807	0.182447	Qin prophage; uncharacterized protein YdfC
entD	0.95884	-0.0606373	0.236651	0.715117	0.145623	11.568	0.186354	phosphopantetheinyl transferase EntD
insC-2	0.951294	-0.072037	0.23768	0.715117	0.145623	19.056	0.187812
rbsR	0.923773	-0.114389	0.23779	0.715117	0.145623	295.986	0.13554	DNA-binding transcriptional dual regulator RbsR
metZ	1.08343	0.115602	0.23897	0.715706	0.145265	134583	0.141095	tRNA-initiator Met(CAU)
rpoC	1.07909	0.10982	0.238775	0.715706	0.145265	6372.86	0.11981	RNA polymerase subunit &beta;'
ypjM_1	1.06679	0.0932723	0.238799	0.715706	0.145265	32.3954	0.187717
potH	1.02224	0.0317318	0.238302	0.715706	0.145265	3.65968	0.182075	putrescine ABC transporter membrane subunit PotH
ydaU	1.01587	0.0227139	0.238371	0.715706	0.145265	1.71177	0.180995	Rac prophage; DUF1376 domain-containing protein YdaU
dmsD	0.922658	-0.116132	0.238985	0.715706	0.145265	152.315	0.159842	redox enzyme maturation protein DmsD
yohP	0.989548	-0.0151585	0.239475	0.716708	0.144658	0.674791	0.180548	uncharacterized membrane protein YohP
oppD	1.08397	0.11632	0.2402	0.717642	0.144092	167.584	0.154718	murein tripeptide ABC transporter / oligopeptide ABC transporter ATP binding subunit OppD
xdhC	0.970615	-0.0430284	0.240257	0.717642	0.144092	6.21591	0.183559	putative xanthine dehydrogenase iron-sulfur-binding subunit XdhC
argG	0.923344	-0.115059	0.24001	0.717642	0.144092	117.427	0.163145	argininosuccinate synthetase
ribC	0.928253	-0.10741	0.240786	0.718756	0.143419	602.847	0.117868	riboflavin synthase
ispU	1.0765	0.106343	0.241434	0.719824	0.142774	766.495	0.115078	<i>ditrans,polycis</i>-undecaprenyl-diphosphate synthase [(2<i>E</i>,6<i>E</i>)-farnesyl-diphosphate specific]
nupX	1.0328	0.0465562	0.241458	0.719824	0.142774	6.49468	0.184016	putative nucleoside transporter
gluQ	0.9307	-0.103612	0.241903	0.720683	0.142255	544.707	0.110443	glutamyl-Q tRNA<sup>Asp</sup> synthetase
rfaE	1.08031	0.111439	0.242802	0.721441	0.141799	327.839	0.129114
ylcJ	1.07593	0.105583	0.243242	0.721441	0.141799	67.3363	0.180478	DLP12 prophage; protein YlcJ
yjeM	1.07235	0.100782	0.243245	0.721441	0.141799	47.812	0.183834	putative transporter YjeM
yciF	1.02736	0.0389358	0.243356	0.721441	0.141799	6.52403	0.182914	DUF892 domain-containing protein YciF
uacT	0.979539	-0.0298255	0.243534	0.721441	0.141799	3.5717	0.181722	urate:H<sup>+</sup> symporter
ytfF	0.930466	-0.103975	0.243094	0.721441	0.141799	57.9442	0.181448	inner membrane protein YtfF
yceH	0.926413	-0.110272	0.243285	0.721441	0.141799	98.3558	0.174264	DUF480 domain-containing protein YceH
ccmG	0.924704	-0.112937	0.243451	0.721441	0.141799	137.285	0.167217	thiol:disulfide oxidoreductase CcmG
aroA	0.923296	-0.115135	0.243573	0.721441	0.141799	161.001	0.151844	3-phosphoshikimate 1-carboxyvinyltransferase
yidZ	1.08223	0.114009	0.244002	0.72178	0.141595	110.943	0.163581	DNA-binding transcriptional dual regulator YidZ
hyfD	0.973649	-0.0385256	0.243891	0.72178	0.141595	4.69007	0.182805	hydrogenase 4 component D
yjiY	0.92388	-0.114223	0.244805	0.72369	0.140447	203.676	0.145037
yeeO	1.05757	0.0807558	0.245378	0.724916	0.139713	23.3765	0.187965	FMN/FAD exporter
galU	0.928625	-0.106832	0.245683	0.72535	0.139453	439.156	0.119493	UTP&mdash;glucose-1-phosphate uridylyltransferase
insCD-6	0.931493	-0.102384	0.246501	0.727298	0.138288	47.4481	0.181989
ypdB	1.08135	0.112834	0.247359	0.728507	0.137566	129.896	0.164642
yjfK	1.04391	0.0619944	0.247678	0.728507	0.137566	13.7371	0.186211	DUF2491 domain-containing protein YjfK
nuoM	0.926986	-0.10938	0.247455	0.728507	0.137566	401.179	0.126861	NADH:quinone oxidoreductase subunit M
cmoM	0.924915	-0.112608	0.247686	0.728507	0.137566	219.915	0.140105	tRNA <b>cmo</b><sup>5</sup>U34 methyltransferase
glnD	0.924375	-0.11345	0.247705	0.728507	0.137566	178.654	0.156625	protein-PII uridylyltransferase/uridylyl-removing enzyme
opgE	1.08154	0.113085	0.249816	0.729678	0.136869	171.253	0.151361	phosphoethanolamine transferase OpgE
tadA	1.08117	0.112593	0.248967	0.729678	0.136869	235.413	0.143149	tRNA adenosine<sup>34</sup> deaminase
nfuA	1.07958	0.110475	0.249619	0.729678	0.136869	262.152	0.131578	iron-sulfur cluster carrier protein NfuA
nhaA	1.07552	0.105036	0.249853	0.729678	0.136869	583.643	0.116646	Na<sup>+</sup>:H<sup>+</sup> antiporter NhaA
nudJ	1.07328	0.10202	0.249346	0.729678	0.136869	50.5626	0.181702	phosphatase NudJ
yehI	1.06668	0.0931269	0.249137	0.729678	0.136869	34.0916	0.18586	DUF4132 domain-containing protein YehI
aspA	1.06451	0.0901936	0.24975	0.729678	0.136869	10579.6	0.0908078	aspartate ammonia-lyase
IS128	0.963717	-0.0533186	0.249732	0.729678	0.136869	10.7024	0.184729
yhaL	0.936543	-0.0945831	0.249448	0.729678	0.136869	36.2506	0.185014	uncharacterized protein YhaL
yfeD	0.924784	-0.112811	0.249812	0.729678	0.136869	177.276	0.145034	putative DNA-binding transcriptional regulator YfeD
intS	0.92458	-0.11313	0.249129	0.729678	0.136869	148.156	0.148833	CPS-53 (KpLE1) prophage; prophage CPS-53 integrase
prfB	1.07614	0.105866	0.250154	0.730095	0.136621	775.777	0.117739	peptide chain release factor RF2
pcm	1.081	0.112367	0.250712	0.731255	0.135931	250.284	0.137718	protein-L-isoaspartate <i>O</i>-methyltransferase
wzb	0.991113	-0.0128778	0.251134	0.732021	0.135477	0.799074	0.18037	protein-tyrosine phosphatase
yebS	1.08106	0.112443	0.251547	0.732601	0.135133	189.48	0.143384
yfiL	0.960724	-0.0578055	0.25191	0.732601	0.135133	11.8829	0.185326	DUF2799 domain-containing lipoprotein YfiL
ydgC	0.943824	-0.0834109	0.251971	0.732601	0.135133	27.9696	0.186639	GlpM family protein
narI	0.93196	-0.10166	0.251695	0.732601	0.135133	1356.79	0.110939	nitrate reductase A subunit &gamma;
yccS	1.07979	0.110757	0.252975	0.732807	0.13501	307.149	0.134339	putative transporter YccS
mutY	1.07913	0.109872	0.252893	0.732807	0.13501	292.465	0.131783	adenine DNA glycosylase
mrdB	1.07617	0.105904	0.252539	0.732807	0.13501	435.898	0.120324	peptidoglycan glycosyltransferase MrdB
ispE	1.0737	0.102587	0.253	0.732807	0.13501	680.884	0.1129	4-(cytidine 5'-diphospho)-2-<i>C</i>-methyl-D-erythritol kinase
ymfT	0.988496	-0.0166929	0.252606	0.732807	0.13501	1.10366	0.180461	e14 prophage; putative DNA-binding transcriptional regulator YmfT
nfsB	0.926625	-0.109943	0.252271	0.732807	0.13501	433.542	0.133265	NAD(P)H-dependent nitroreductase NfsB
acrD	0.925924	-0.111035	0.253628	0.734162	0.134208	104.039	0.1616	multidrug efflux pump RND permease AcrD
frvR	0.937161	-0.0936318	0.25422	0.735412	0.133469	44.6918	0.183235	putative DNA-binding transcriptional regulator FrvR
dauA	1.08048	0.111676	0.254751	0.735491	0.133423	129.335	0.158511	aerobic C4-dicarboxylate transporter DauA
rcsF	1.08014	0.111212	0.255081	0.735491	0.133423	204.695	0.141836	sensor lipoprotein RcsF
yfjH	1.08011	0.111173	0.254578	0.735491	0.133423	185.095	0.140626	CP4-57 prophage; uncharacterized protein YfjH
rsmG	1.07989	0.110879	0.256973	0.735491	0.133423	223.657	0.14383	16S rRNA m<sup>7</sup>G527 methyltransferase
trpR	1.07952	0.110394	0.255321	0.735491	0.133423	107.176	0.16497	DNA-binding transcriptional repressor TrpR
dgkA	1.07902	0.109727	0.256893	0.735491	0.133423	98.1583	0.165007	diacylglycerol kinase
holA	1.07824	0.108681	0.2568	0.735491	0.133423	284.277	0.132396	DNA polymerase III subunit &delta;
thrW	1.07545	0.104938	0.254957	0.735491	0.133423	220000	0.118946	tRNA-Thr(CGU)
yicN	1.07394	0.10292	0.2562	0.735491	0.133423	75.3132	0.178196	DUF1198 domain-containing protein YicN
accA	1.07132	0.0993918	0.256836	0.735491	0.133423	806.969	0.107711	acetyl-CoA carboxyltransferase subunit &alpha;
malT	1.07006	0.097691	0.255619	0.735491	0.133423	3274.87	0.104343	DNA-binding transcriptional activator MalT
prpC	1.0218	0.031109	0.256907	0.735491	0.133423	4.81517	0.181749	2-methylcitrate synthase
micC	1.01513	0.0216627	0.255937	0.735491	0.133423	1.76974	0.180791	small regulatory RNA MicC
ralA	0.951536	-0.0716706	0.256418	0.735491	0.133423	18.5499	0.186452	Rac prophage; small regulatory RNA antitoxin RalA
murG	0.932238	-0.101229	0.254797	0.735491	0.133423	497.704	0.1113	N-acetylglucosaminyl transferase
nuoC	0.931459	-0.102436	0.256154	0.735491	0.133423	1292.68	0.113808	NADH:quinone oxidoreductase subunit CD
ytfK	0.931171	-0.102882	0.256763	0.735491	0.133423	870.269	0.11625	stringent response modulator YtfK
mglB	0.965393	-0.0508121	0.25735	0.736112	0.133056	10.1751	0.184195	D-galactose/methyl-galactoside ABC transporter periplasmic binding protein
ydiU	1.07967	0.110587	0.259769	0.737052	0.132502	131.665	0.155707
ilvC	1.07962	0.110527	0.258065	0.737052	0.132502	131.397	0.163133	ketol-acid reductoisomerase (NADP<sup>+</sup>)
usg	1.07959	0.11049	0.260272	0.737052	0.132502	172.232	0.148852	putative semialdehyde dehydrogenase Usg
zapC	1.07895	0.109629	0.259393	0.737052	0.132502	212.553	0.149228	cell division protein ZapC
plsC	1.07701	0.107028	0.258863	0.737052	0.132502	280.979	0.127652	1-acylglycerol-3-phosphate <i>O</i>-acyltransferase PlsC
ymfE	1.07598	0.105657	0.260047	0.737052	0.132502	87.7209	0.171959	e14 prophage; uncharacterized protein YmfE
rsmF	1.0746	0.103805	0.260246	0.737052	0.132502	118.666	0.175569	16S rRNA m<sup>5</sup>C1407 methyltransferase
rpsG	1.07112	0.0991203	0.259881	0.737052	0.132502	3959.57	0.10755	30S ribosomal subunit protein S7
yahI	1.01373	0.0196803	0.260194	0.737052	0.132502	1.57121	0.180687	carbamate kinase-like protein YahI
frc	0.975243	-0.036166	0.259152	0.737052	0.132502	4.13397	0.182299	formyl-CoA transferase
hisM	0.958972	-0.0604395	0.258467	0.737052	0.132502	12.3683	0.185354	lysine/arginine/ornithine ABC transporter / histidine ABC transporter, membrane subunit HisM
hisP	0.952298	-0.0705149	0.26041	0.737052	0.132502	17.9485	0.186027	lysine/arginine/ornithine ABC transporter / histidine ABC transporter, ATP binding subunit
yhhL	0.949194	-0.0752247	0.259268	0.737052	0.132502	27.1334	0.18628	DUF1145 domain-containing protein YhhL
insC-1	0.947209	-0.0782455	0.258534	0.737052	0.132502	24.9592	0.186213
cstA	0.929777	-0.105044	0.258683	0.737052	0.132502	71.8792	0.173155	pyruvate transporter CstA
nudK	0.927155	-0.109118	0.259571	0.737052	0.132502	111.31	0.162959	GDP-mannose hydrolase
yjjP	0.926203	-0.110599	0.258462	0.737052	0.132502	186.717	0.155304	putative succinate exporter YjjP
hyfB	0.957657	-0.0624197	0.260771	0.737164	0.132436	17.3266	0.185406	hydrogenase 4 component B
yigA	0.930027	-0.104656	0.260743	0.737164	0.132436	452.298	0.122592	DUF484 domain-containing protein YigA
fhuB	0.931217	-0.102811	0.260934	0.737172	0.132431	64.4565	0.175314	iron(III) hydroxamate ABC transporter membrane subunit
G0-10703	1.07001	0.0976262	0.26146	0.737747	0.132092	60.086	0.180656
narG	0.931435	-0.102473	0.261348	0.737747	0.132092	11768.3	0.116739	nitrate reductase A subunit &alpha;
ycgJ	1.07805	0.108426	0.262013	0.738853	0.131442	103.481	0.164455	PF05666 family protein YcgJ
speB	1.07852	0.109054	0.264299	0.738962	0.131378	155.512	0.157139	agmatinase
acpS	1.07802	0.108384	0.263141	0.738962	0.131378	125.08	0.160582	holo-[acyl-carrier-protein] synthase
ileU	1.07723	0.107332	0.264007	0.738962	0.131378	372732	0.132609	tRNA-Ile(GAU)
fusA	1.07441	0.103549	0.262723	0.738962	0.131378	16585	0.120021	elongation factor G
tatB	1.06593	0.092116	0.264486	0.738962	0.131378	1111.01	0.0974886	twin arginine protein translocation system - TatB protein
spoT	1.06391	0.0893706	0.264057	0.738962	0.131378	2331.04	0.0936134	bifunctional (p)ppGpp synthase/hydrolase SpoT
ylbG	1.05629	0.0790001	0.26272	0.738962	0.131378	25.2532	0.18605	putative DNA-binding transcriptional regulator YlbG
yhaC	1.04118	0.0582171	0.263051	0.738962	0.131378	11.2804	0.184935	uncharacterized protein YhaC
glvB	1.00941	0.0135141	0.264628	0.738962	0.131378	0.686045	0.180397	putative PTS enzyme II component GlvB
paaG	1.00941	0.0135141	0.264628	0.738962	0.131378	0.686045	0.180397	putative ring 1,2-epoxyphenylacetyl-CoA isomerase (oxepin-CoA forming)
ymfP	1.00941	0.0135141	0.264628	0.738962	0.131378	0.686045	0.180397
bssS	0.936549	-0.0945737	0.263304	0.738962	0.131378	1654.98	0.101911	regulator of biofilm formation
rpmG	0.931507	-0.102361	0.264327	0.738962	0.131378	6297.04	0.127752	50S ribosomal subunit protein L33
ybjT	0.928185	-0.107516	0.263683	0.738962	0.131378	112.165	0.163919	putative NAD(P)-binding protein YbjT
yhiY	0.928058	-0.107713	0.263285	0.738962	0.131378	291.305	0.135343	protein YhiY
galT	0.927017	-0.109332	0.263381	0.738962	0.131378	130.859	0.150993	galactose-1-phosphate uridylyltransferase
sraA	1.04289	0.0605897	0.265697	0.738962	0.131378	16.3203	0.185022	small RNA SraA
trpA	0.945712	-0.0805278	0.265557	0.738962	0.131378	37.6586	0.185075	tryptophan synthase subunit &alpha;
caiE	0.940514	-0.088479	0.265375	0.738962	0.131378	40.8825	0.183656	putative transferase CaiE
fliK	0.935157	-0.0967192	0.265622	0.738962	0.131378	833.837	0.106531	flagellar hook-length control protein
ynjI	0.930252	-0.104307	0.26506	0.738962	0.131378	73.2774	0.17061	DUF1266 domain-containing protein YnjI
yciK	0.92752	-0.10855	0.265583	0.738962	0.131378	122.113	0.15456	putative oxidoreductase
creC	0.927478	-0.108615	0.265756	0.738962	0.131378	123.058	0.15265	sensory histidine kinase CreC
ycgZ	0.977224	-0.0332395	0.266235	0.739397	0.131122	3.89156	0.181846	putative two-component system connector protein YcgZ
lipA	0.938089	-0.0922033	0.266179	0.739397	0.131122	1385	0.0989546	lipoyl synthase
yidA	1.0784	0.108894	0.266744	0.739917	0.130817	178.762	0.149163	sugar phosphatase YidA
btuD	1.07811	0.108505	0.266701	0.739917	0.130817	149.766	0.145161	vitamin B<sub>12</sub> ABC transporter ATP binding subunit
yjiH	1.03294	0.0467599	0.266911	0.739932	0.130808	7.19282	0.183504	uncharacterized protein YjiH
kduI	1.03713	0.0525941	0.267498	0.740605	0.130413	10.4119	0.184085	5-dehydro-4-deoxy-D-glucuronate isomerase
malG	0.963851	-0.0531186	0.267587	0.740605	0.130413	10.5853	0.184126	maltose ABC transporter membrane subunit MalG
mtlR	0.960462	-0.0581999	0.267678	0.740605	0.130413	706.26	0.184093	transcriptional repressor MtlR
fliA	0.928629	-0.106826	0.267799	0.740605	0.130413	2669.56	0.13749	RNA polymerase sigma factor FliA
alaX	1.07383	0.10276	0.268231	0.741351	0.129976	440311	0.121037	tRNA-Ala(GGC)
entC	1.03956	0.0559695	0.268536	0.741748	0.129743	14.5988	0.184516	isochorismate synthase EntC
ilvA	0.92813	-0.107602	0.268882	0.742256	0.129446	133.18	0.155129	threonine deaminase
pdxA	1.07218	0.100547	0.269202	0.742694	0.12919	790.865	0.116057	4-hydroxythreonine-4-phosphate dehydrogenase
ymfK	0.928395	-0.10719	0.269452	0.742936	0.129049	127.223	0.157019	e14 prophage; putative repressor protein YmfK
ykfG	1.01704	0.0243822	0.269852	0.7435	0.128719	1.99884	0.180984	CP4-6 prophage; RadC-like JAB domain-containing protein YkfG
cpxA	0.928276	-0.107375	0.26998	0.7435	0.128719	239.659	0.145344	sensor histidine kinase CpxA
cbrB	1.04157	0.0587589	0.270797	0.744853	0.127929	12.1775	0.184691	putative inner membrane protein
ypdJ	1.0233	0.0332333	0.270736	0.744853	0.127929	3.64856	0.181842	CPS-53 (KpLE1) prophage; putative uncharacterized protein YpdJ
rseP	0.938415	-0.0917014	0.27118	0.745014	0.127836	1372.16	0.0997587	intramembrane zinc metalloprotease RseP
nagB	0.928097	-0.107652	0.271178	0.745014	0.127836	173.101	0.148814	glucosamine-6-phosphate deaminase
msbA	1.073	0.101647	0.271534	0.745539	0.127529	495.991	0.119938	ATP-binding lipopolysaccharide transport protein
rpsF	1.06926	0.096616	0.271882	0.745547	0.127525	4483.37	0.107838	30S ribosomal subunit protein S6
ymfR	1.0141	0.0202038	0.272024	0.745547	0.127525	1.48255	0.18067	e14 prophage; IPR020297 domain-containing protein YmfR
insH21	0.937988	-0.0923581	0.271816	0.745547	0.127525	951.674	0.10109	IS<i>5</i> transposase and trans-activator
ytjB	0.938524	-0.0915341	0.272452	0.746274	0.127102	47.1545	0.180958	probable inner membrane protein Smp
yjgA	1.07137	0.099458	0.273185	0.747836	0.126194	469.992	0.115685	putative ribosome biogenesis factor YjgA
insH-6	1.07357	0.102415	0.274332	0.749879	0.125009	401.816	0.123333
cydB	1.069	0.0962589	0.275163	0.749879	0.125009	1560.94	0.109429	cytochrome <i>bd</i>-I subunit 2
cadB	1.03975	0.0562363	0.275402	0.749879	0.125009	11.0831	0.18423	lysine:cadaverine antiporter
ppdA	1.03828	0.0541969	0.275232	0.749879	0.125009	11.2231	0.184098	prepilin-type N-terminal cleavage/methylation domain-containing protein PpdA
trpL	0.962186	-0.055613	0.274594	0.749879	0.125009	12.5762	0.184075	<i>trp</i> operon leader peptide
yjdF	0.945634	-0.0806465	0.275028	0.749879	0.125009	26.6908	0.184025	DUF2238 domain-containing inner membrane protein YjdF
ligB	0.942564	-0.0853382	0.27441	0.749879	0.125009	36.9601	0.183141	DNA ligase B
cra	0.931694	-0.102072	0.275048	0.749879	0.125009	357.566	0.124506	DNA-binding transcriptional dual regulator Cra
tatE	0.929899	-0.104854	0.27526	0.749879	0.125009	194.326	0.160921	twin arginine protein translocation system - TatE protein
argZ	1.07171	0.0999209	0.275779	0.750458	0.124674	237651	0.117961	tRNA-Arg(ACG)
acs	1.04019	0.056841	0.276658	0.752405	0.123549	11.607	0.184276	acetyl-CoA synthetase (AMP-forming)
asnV	1.07345	0.102256	0.276845	0.752467	0.123513	521565	0.125177	tRNA-Asn(GUU)
mak	0.935175	-0.0966924	0.278301	0.755978	0.121491	54.6513	0.175255	fructokinase
yrdA	1.07539	0.104863	0.281318	0.756782	0.121029	294.374	0.144367	hexapeptide repeats-containing protein YrdA
tamA	1.07432	0.103423	0.279084	0.756782	0.121029	277.161	0.131694	translocation and assembly module subunit TamA
yajG	1.0713	0.099364	0.279747	0.756782	0.121029	364.72	0.119056	putative lipoprotein YajG
mraZ	1.06844	0.0955063	0.281731	0.756782	0.121029	708.353	0.110736	DNA-binding transcriptional repressor MraZ
ftnA	1.06607	0.0922958	0.279928	0.756782	0.121029	987.088	0.10297	ferritin iron storage protein
yojI	1.05859	0.0821441	0.280723	0.756782	0.121029	38.9002	0.183276	ABC transporter family protein / microcin J25 efflux protein
tauD	1.02894	0.0411594	0.281701	0.756782	0.121029	6.09978	0.182569	taurine dioxygenase
envR	1.0131	0.018771	0.279469	0.756782	0.121029	1.49775	0.180552	DNA-binding transcriptional repressor EnvR
cysH	0.981509	-0.0269262	0.281148	0.756782	0.121029	3.41193	0.181119	phosphoadenosine phosphosulfate reductase
nanC	0.978375	-0.0315403	0.281233	0.756782	0.121029	3.62719	0.181527	<i>N</i>-acetylneuraminate outer membrane channel
insC-4	0.957264	-0.0630105	0.281645	0.756782	0.121029	21.43	0.184143
yhaO	0.943653	-0.083672	0.280672	0.756782	0.121029	38.0606	0.18242
flhA	0.937898	-0.0924977	0.279061	0.756782	0.121029	834.484	0.105407	flagellar biosynthesis protein FlhA
elaA	0.934504	-0.0977273	0.280255	0.756782	0.121029	61.3251	0.172952	putative acetyltransferase ElaA
mngB	0.932226	-0.101249	0.280445	0.756782	0.121029	74.3489	0.1675	&alpha;-mannosidase
icd	0.93135	-0.102605	0.279518	0.756782	0.121029	551.615	0.128598	isocitrate dehydrogenase
cutA	0.931217	-0.10281	0.280918	0.756782	0.121029	131.323	0.163241	copper binding protein CutA
rnk	0.93001	-0.104683	0.281319	0.756782	0.121029	140.995	0.15182	nucleoside diphosphate kinase regulator
malQ	0.929517	-0.105447	0.27945	0.756782	0.121029	225.689	0.148224	4-&alpha;-glucanotransferase
fimC	1.03312	0.0470113	0.282057	0.756823	0.121006	8.50995	0.183129	type 1 fimbriae periplasmic chaperone
insG	0.935078	-0.0968408	0.282077	0.756823	0.121006	73.2096	0.173262	KpLE2 phage-like element; IS<i>4</i> putative transposase
yraQ	1.07299	0.101639	0.282732	0.756886	0.12097	80.9177	0.165549	permease family protein YraQ
yfcS	0.9813	-0.0272332	0.282471	0.756886	0.12097	2.93107	0.181134	putative fimbrial chaperone YfcS
nanK	0.951738	-0.0713632	0.28276	0.756886	0.12097	22.0352	0.184041	<i>N</i>-acetylmannosamine kinase
yrdD	0.931468	-0.102422	0.282624	0.756886	0.12097	351.472	0.132206	putative DNA topoisomerase
thyA	1.07174	0.0999594	0.282988	0.757054	0.120873	300.505	0.122709	thymidylate synthase
lolD	1.07482	0.104094	0.283674	0.757174	0.120804	159.556	0.150585	lipoprotein release complex - ATP binding subunit
rirA	1.07455	0.103729	0.285476	0.757174	0.120804	180.691	0.14705	small regulatory RNA RirA
dfp	1.07403	0.103029	0.285767	0.757174	0.120804	237.585	0.137095	fused 4'-phosphopantothenoylcysteine decarboxylase and phosphopantothenoylcysteine synthetase
metU	1.07326	0.101996	0.283838	0.757174	0.120804	327044	0.129835	tRNA-Met(CAU)
yfcU	1.07177	0.0999921	0.286949	0.757174	0.120804	86.2788	0.166919	putative outer membrane usher protein YfcU
nusB	1.07107	0.099057	0.288793	0.757174	0.120804	403.887	0.123791	transcription antitermination protein NusB
hda	1.07022	0.097906	0.285125	0.757174	0.120804	622.499	0.116308	inibitor of reinitiation of DNA replication
yjhU	1.06938	0.0967792	0.286352	0.757174	0.120804	441.488	0.115974	KpLE2 phage-like element; putative DNA-binding transcriptional regulator YjhU
nirC	1.06788	0.0947468	0.28854	0.757174	0.120804	1013.03	0.111979	nitrite transporter NirC
rimP	1.06664	0.0930726	0.287914	0.757174	0.120804	736.543	0.108334	ribosome maturation factor RimP
dsdA	1.06181	0.0865207	0.288361	0.757174	0.120804	38.7783	0.180288	D-serine ammonia-lyase
yqjG	1.05649	0.079276	0.288974	0.757174	0.120804	31.1633	0.182603	glutathionyl-hydroquinone reductase YqjG
ldtE	1.0521	0.0732714	0.288665	0.757174	0.120804	22.645	0.183578	L,D-transpeptidase LdtE
osmY	1.04293	0.0606396	0.287754	0.757174	0.120804	14.2865	0.183923	periplasmic chaperone OsmY
yaiP	1.03655	0.0517841	0.284691	0.757174	0.120804	9.45286	0.183472	putative glucosyltransferase
yhfU	1.03042	0.0432263	0.284819	0.757174	0.120804	9.85348	0.182595	DUF2620 domain-containing protein YhfU
ygcQ	1.02671	0.038028	0.284513	0.757174	0.120804	6.01022	0.182102	putative flavoprotein
ylbE	1.01614	0.0230974	0.286054	0.757174	0.120804	2.453	0.180813	DUF1116 domain-containing protein YlbE
yobI	0.989032	-0.0159113	0.284823	0.757174	0.120804	1.00014	0.180318	uncharacterized protein YobI
rutB	0.987752	-0.0177796	0.288823	0.757174	0.120804	1.6393	0.180424	ureidoacrylate amidohydrolase
wzc	0.982591	-0.0253376	0.286621	0.757174	0.120804	2.39447	0.180942	protein-tyrosine kinase Wzc
insE-4	0.962956	-0.0544583	0.285327	0.757174	0.120804	11.6132	0.183643
qorB	0.960706	-0.0578327	0.284129	0.757174	0.120804	18.1159	0.183872	NAD(P)H:quinone oxidoreductase
fucO	0.952029	-0.0709233	0.284033	0.757174	0.120804	20.292	0.184117	L-1,2-propanediol oxidoreductase
ydbC	0.949078	-0.0754013	0.287909	0.757174	0.120804	26.225	0.183092
yhgP	0.9488	-0.0758247	0.28614	0.757174	0.120804	27.1284	0.18329	protein YhgP
rho	0.941755	-0.0865757	0.288961	0.757174	0.120804	2735.88	0.0965764	transcription termination factor Rho
ybhR	0.936883	-0.0940597	0.287016	0.757174	0.120804	76.5189	0.174964	ABC exporter membrane subunit YbhR
mlaF	0.935679	-0.0959147	0.285603	0.757174	0.120804	668.517	0.111668	intermembrane phospholipid transport system, ATP binding subunit MlaF
fdnH	0.93567	-0.0959284	0.287505	0.757174	0.120804	871.128	0.114964	formate dehydrogenase N subunit &beta;
dsbB	0.935303	-0.0964942	0.286133	0.757174	0.120804	522.468	0.115813	protein thiol:quinone oxidoreductase DsbB<sub>oxidized</sub> // protein thiol:quinone oxidoreductase DsbB
nagE	0.932434	-0.100927	0.287681	0.757174	0.120804	286.964	0.130709	N-acetylglucosamine-specific PTS enzyme IIABC component
yccJ	0.932431	-0.100931	0.286331	0.757174	0.120804	99.3978	0.162768	PF13993 family protein YccJ
yhhM	0.93235	-0.101057	0.283651	0.757174	0.120804	95.2721	0.165562	DUF2500 domain-containing protein YhhM
tqsA	0.931139	-0.102931	0.287981	0.757174	0.120804	180.87	0.150645	autoinducer 2 exporter
ybjG	0.930893	-0.103313	0.284165	0.757174	0.120804	111.697	0.155627	undecaprenyl pyrophosphate phosphatase
dgcZ	1.06698	0.0935329	0.28952	0.758089	0.12028	55.3157	0.174992	diguanylate cyclase DgcZ
yfjU	1.02705	0.0385029	0.289984	0.758089	0.12028	8.04177	0.182109	CP4-57 prophage; putative arsenate reductase-like protein YfjU
ykgR	0.945464	-0.0809059	0.289917	0.758089	0.12028	31.66	0.181889	uncharacterized membrane protein YkgR
yoaJ	0.934366	-0.0979398	0.289857	0.758089	0.12028	71.8211	0.168752	uncharacterized protein YoaJ
marA	1.074	0.102988	0.290372	0.758267	0.120178	81.6813	0.167928	DNA-binding transcriptional dual regulator MarA
rhsA	1.07368	0.10256	0.290382	0.758267	0.120178	114.674	0.152691	rhs element protein RhsA
ybcQ	0.964907	-0.051538	0.290761	0.758822	0.11986	10.6017	0.183153
ybcY	1.06146	0.0860481	0.291406	0.759644	0.11939	36.8972	0.179833	DLP12 prophage; putative SAM-dependent methyltransferase YbcY
nimT	0.942872	-0.0848667	0.291398	0.759644	0.11939	37.6884	0.180085	2-nitroimidazole exporter
yqjE	0.932846	-0.10029	0.292121	0.761075	0.118573	95.3147	0.160347	inner membrane protein YqjE
yefM	1.07342	0.102217	0.292463	0.761532	0.118312	143.458	0.150262	YefM antitoxin of the YoeB-YefM toxin-antitoxin pair and DNA binding transcriptional repressor
insEF-4	0.9426	-0.0852828	0.293515	0.763838	0.116999	41.379	0.179478
pyrE	1.05837	0.0818412	0.293723	0.763946	0.116937	38.4357	0.180881	orotate phosphoribosyltransferase
ybjJ	0.937362	-0.0933225	0.293984	0.764193	0.116797	72.756	0.172998	inner membrane protein YbjJ
xylH	1.05706	0.0800587	0.294201	0.764324	0.116722	37.3324	0.181503	xylose ABC transporter membrane subunit
prlC	1.06989	0.0974631	0.294855	0.765156	0.11625	387.082	0.128043	oligopeptidase A
php	0.98536	-0.0212777	0.294852	0.765156	0.11625	1.99447	0.180614	putative hydrolase
kilR	0.987717	-0.0178302	0.295109	0.765382	0.116122	1.54756	0.180424	Rac prophage; inhibitor of FtsZ
wbbJ	0.932705	-0.100508	0.295352	0.765579	0.11601	342.87	0.137236	putative lipopolysaccharide biosynthesis O-acetyl transferase WbbJ
dgcC	1.0336	0.0476791	0.295724	0.76571	0.115936	11.8805	0.182759	diguanylate cyclase DgcC
folE	0.932354	-0.101051	0.295736	0.76571	0.115936	160.006	0.143871	GTP cyclohydrolase 1
yqhD	1.07253	0.101014	0.29759	0.767491	0.114926	258.719	0.15069	NADPH-dependent aldehyde reductase YqhD
yjgL	1.07217	0.100533	0.297332	0.767491	0.114926	123.093	0.154111	protein YjgL
leuL	1.0719	0.100166	0.297728	0.767491	0.114926	267.352	0.136659	<i>leu</i> operon leader peptide
pgsA	1.0697	0.0972119	0.297603	0.767491	0.114926	345.896	0.124746	CDP-diacylglycerol&mdash;glycerol-3-phosphate 3-phosphatidyltransferase
yfbM	1.03098	0.0440211	0.297763	0.767491	0.114926	7.11889	0.182392	DUF1877 domain-containing protein YfbM
yqfI	0.958408	-0.0612881	0.297258	0.767491	0.114926	15.3728	0.183245	protein YqfI
gdhA	0.934041	-0.0984425	0.297331	0.767491	0.114926	246.877	0.129226	glutamate dehydrogenase
bfr	0.932747	-0.100442	0.297021	0.767491	0.114926	132.749	0.15318	bacterioferritin
ddlA	1.07063	0.0984577	0.298724	0.768899	0.114131	263.505	0.129421	D-alanine&mdash;D-alanine ligase A
yjhB	1.04396	0.0620675	0.298811	0.768899	0.114131	21.985	0.183363
puuD	0.961706	-0.0563317	0.298701	0.768899	0.114131	13.4266	0.183003	&gamma;-glutamyl-&gamma;-aminobutyrate hydrolase
aspV	1.08541	0.118237	0.301238	0.769754	0.113648	1.71255e+06	0.0990246	tRNA-Asp(GUC)
pmrD	1.07192	0.100202	0.301634	0.769754	0.113648	175.334	0.14021	signal transduction protein PmrD
ygiA	1.07126	0.099306	0.299842	0.769754	0.113648	228.501	0.138046
slmA	1.07093	0.0988593	0.300837	0.769754	0.113648	276.926	0.130729	nucleoid occlusion factor SlmA
yebO	1.06665	0.0930865	0.300136	0.769754	0.113648	1347.09	0.113616	uncharacterized protein YebO
hisR	1.06604	0.0922662	0.301415	0.769754	0.113648	735218	0.111997	tRNA-His(GUG)
btuB	1.06512	0.0910097	0.30057	0.769754	0.113648	522.74	0.109023	cobalamin outer membrane transporter
rpsL	1.06099	0.0854059	0.302034	0.769754	0.113648	2746.72	0.0982676	30S ribosomal subunit protein S12
lsrR	1.05614	0.0788001	0.302329	0.769754	0.113648	32.2425	0.180735	DNA-binding transcriptional repressor LsrR
mokB	1.05577	0.0782889	0.299601	0.769754	0.113648	39.1129	0.181275	putative regulatory protein MokB
ybgQ	1.02977	0.042316	0.301623	0.769754	0.113648	6.74149	0.182153	putative fimbrial usher protein YbgQ
ninE	1.00866	0.0124404	0.302499	0.769754	0.113648	0.616363	0.180298	DLP12 prophage; NinE family prophage protein
yhdW	0.961815	-0.0561679	0.301254	0.769754	0.113648	14.3423	0.182883	putative ABC transporter periplasmic binding protein YhdW
pmrR	0.940205	-0.0889532	0.301997	0.769754	0.113648	48.6865	0.17498	small regulatory membrane protein PmrR
pdeC	0.937688	-0.0928206	0.301873	0.769754	0.113648	60.1553	0.170613	c-di-GMP phosphodiesterase PdeC
yjjY	0.937141	-0.0936614	0.29989	0.769754	0.113648	65.6345	0.170184	uncharacterized protein YjjY
rsmE	0.936484	-0.0946733	0.302456	0.769754	0.113648	358.937	0.119702	16S rRNA m<sup>3</sup>U1498 methyltransferase
sxy	0.935394	-0.0963539	0.300493	0.769754	0.113648	74.6276	0.165243	transcriptional coactivator for CRP
fklB	0.935229	-0.0966078	0.301035	0.769754	0.113648	382.771	0.125756	peptidyl-prolyl <i>cis-trans</i> isomerase FklB
rsmD	0.933609	-0.0991093	0.301394	0.769754	0.113648	125.241	0.155618	16S rRNA m<sup>2</sup>G966 methyltransferase
rrlH	1.06612	0.0923688	0.302686	0.769803	0.113621	3301.83	0.113396	23S ribosomal RNA
proK	1.07113	0.0991381	0.303565	0.77161	0.112602	286734	0.138126	tRNA-Pro(CGG)
entE	1.04547	0.0641529	0.304748	0.773622	0.111471	17.6493	0.182794	2,3-dihydroxybenzoate-AMP ligase
yaeR	0.94258	-0.0853123	0.304862	0.773622	0.111471	44.0532	0.176811	VOC domain-containing protein YaeR
glpG	0.93505	-0.0968844	0.30467	0.773622	0.111471	340.53	0.12872	rhomboid protease GlpG
yhjD	0.943503	-0.0839007	0.305124	0.773857	0.111339	67.8417	0.177661	putative transporter YhjD
ydgK	0.938101	-0.0921841	0.305642	0.774744	0.110842	484.386	0.114751	DUF2569 domain-containing inner membrane protein YdgK
istR	1.06687	0.0933909	0.305963	0.775129	0.110626	542.393	0.117418	small regulatory RNA IstR-1 // small RNA IstR-2
yibJ	1.07079	0.0986761	0.306288	0.775524	0.110405	164.794	0.1412	putative RHS domain-containing protein YibJ
evgS	0.936851	-0.0941092	0.307818	0.778968	0.10848	849.298	0.121629	EvgS-<i>N</i>-phospho-L-histidine-721 // EvgS-phospho-L-aspartate // EvgS-<i>N</i>-phospho-L-histidine-1137 // sensor histidine kinase EvgS
malI	1.07013	0.0977842	0.3106	0.77964	0.108106	134.66	0.149483	DNA-binding transcriptional repressor MalI
dinJ	1.06841	0.0954698	0.312098	0.77964	0.108106	334.777	0.129166	antitoxin/DNA-binding transcriptional repressor DinJ
rffT	1.06732	0.0939969	0.311453	0.77964	0.108106	483.986	0.122903
deoD	1.06701	0.093571	0.309869	0.77964	0.108106	1021.24	0.11958	purine nucleoside phosphorylase
dacA	1.06486	0.0906697	0.309701	0.77964	0.108106	610.32	0.112182	D-alanyl-D-alanine carboxypeptidase DacA
purA	1.06337	0.0886382	0.309211	0.77964	0.108106	2602.05	0.106639	adenylosuccinate synthetase
pdeL	1.06274	0.0877954	0.312027	0.77964	0.108106	67.7962	0.17346	DNA-binding transcriptional regulator/c-di-GMP phosphodiesterase PdeL
acrZ	1.06079	0.0851395	0.310946	0.77964	0.108106	2490.4	0.100787	multidrug efflux pump accessory protein AcrZ
cbpM	1.04713	0.066446	0.31132	0.77964	0.108106	20.0716	0.182094	chaperone modulator CbpM
yhhH	1.04192	0.0592406	0.311823	0.77964	0.108106	15.6105	0.182407	PF15631 family protein YhhH
pstA	1.04162	0.0588306	0.309224	0.77964	0.108106	16.9774	0.182542	phosphate ABC transporter membrane subunit PstA
sgbH	1.01976	0.028224	0.309246	0.77964	0.108106	4.49049	0.181008	3-keto-L-gulonate-6-phosphate decarboxylase SgbH
[truncated: 2,774 more rows]

## Sheet: fliA deletion
Gene name	Fold change	log2 Fold Change	p-value	padj	-log (padj)	baseMean	lfcSE	Gene Description
[truncated: 4,599 more rows]

[truncated: 1 more sheets: Legend]
